# Supplementary material
Source: ML conference proceedings conference paper supplement (https://openreview.net/forum?id=ml1NjI-ujzf)
Supplement: supplementary_material [file attachment]

## Sheet: Introduction
	Active-Passive SimStereo – Benchmark results
	This file contains the results for a selection of deep learning model for stereo matching on the Active-Passive SimStereo benchmark.
	More details on the benchmark, as well as a discussion on the generalization abilities between active and passive stereo of the tested methods, is provided in our “Active-Passive SimStereo – Benchmarking the Cross Generalization of Deep Learning-based Stereo Methods” paper
	The dataset itself is available on IEEE-dataport: https://ieee-dataport.org/open-access/active-passive-simstereo
	Organization of the document
	This tab contains the summary of the document
	The Infos tab contains the description of the evaluated methods and metrics used in the benchmark.
	The Aggregated metrics tab reports the error metric aggregated over all the test set per method
	The Relative performance indicators tab reports indicator summarizing the average improvement of the error metrics of the previous tab across images of the test set.
	The Raw Per Images tab reports the detailled error metric for each images in the test set.
	The reference tab contains bibtex entries for the refered methods, please cite the relevant method if you copy their results in your work.

## Sheet: Infos
Methods
Name	Description	Training	Bibtex ref	Git repository url (point to the commit used for evaluation)
AANet	AANet architecture with all layers	finetuned on KITTI 2015	xu2020aanet	https://github.com/haofeixu/aanet/tree/f689abf81ef072b4e50eb480d3a73db66eebda44
AANetUnrefined	AANet architecture without the final refinement module	finetuned on KITTI 2015	xu2020aanet	https://github.com/haofeixu/aanet/tree/f689abf81ef072b4e50eb480d3a73db66eebda44
ACVNet	ACVNet architecture with all layers	finetuned on KITTI 2015	xu2022attention	https://github.com/gangweiX/ACVNet/tree/8ed55c6a7f4ee20f9a6373e1fd4749b7b8f02955
ACVNetLvl0	ACVNet initial disparity level with minimal refinement	finetuned on KITTI 2015	xu2022attention	https://github.com/gangweiX/ACVNet/tree/8ed55c6a7f4ee20f9a6373e1fd4749b7b8f02955
ACVNetLvl1	ACVNet second disparity level with intermediate refinement	finetuned on KITTI 2015	xu2022attention	https://github.com/gangweiX/ACVNet/tree/8ed55c6a7f4ee20f9a6373e1fd4749b7b8f02955
ACVNet-ft	ACVNet architecture with all layers	finetuned on KITTI 2015 and then on Active-Passive SimStereo1	xu2022attention	https://github.com/gangweiX/ACVNet/tree/8ed55c6a7f4ee20f9a6373e1fd4749b7b8f02955
AnyNet	Anynet architecture with all layers	finetuned on KITTI 2015	wang2018anytime	https://github.com/mileyan/AnyNet/tree/83badc75af596e76edce67e4917ba4fbacbb7c1d
AnyNetLvl1	Anynet second disparity level with intermediate refinement	finetuned on KITTI 2015	wang2018anytime	https://github.com/mileyan/AnyNet/tree/83badc75af596e76edce67e4917ba4fbacbb7c1d
AnyNetLvl0	Anynet initial disparity level with minimal refinement	finetuned on KITTI 2015	wang2018anytime	https://github.com/mileyan/AnyNet/tree/83badc75af596e76edce67e4917ba4fbacbb7c1d
CascadeStereo	CascadeStereo architecture with all layers	finetuned on KITTI 2015	gu2019cas	https://github.com/alibaba/cascade-stereo/tree/b3b03719036ae1ce2cec48609063d58c87de4298
CascadeStereoStage2	CascadeStereo second disparity level with intermediate refinement	finetuned on KITTI 2015	gu2019cas	https://github.com/alibaba/cascade-stereo/tree/b3b03719036ae1ce2cec48609063d58c87de4298
CascadeStereoStage1	CascadeStereo initial disparity level with minimal refinement	finetuned on KITTI 2015	gu2019cas	https://github.com/alibaba/cascade-stereo/tree/b3b03719036ae1ce2cec48609063d58c87de4298
CascadeStereoFt	CascadeStereo architecture with all layers	finetuned on KITTI 2015 and then on Active-Passive SimStereo1	gu2019cas	https://github.com/alibaba/cascade-stereo/tree/b3b03719036ae1ce2cec48609063d58c87de4298
CascadeStereoFtStage2	CascadeStereo second disparity level with intermediate refinement	finetuned on KITTI 2015 and then on Active-Passive SimStereo1	gu2019cas	https://github.com/alibaba/cascade-stereo/tree/b3b03719036ae1ce2cec48609063d58c87de4298
CascadeStereoFtStage1	CascadeStereo initial disparity level with minimal refinement	finetuned on KITTI 2015 and then on Active-Passive SimStereo1	gu2019cas	https://github.com/alibaba/cascade-stereo/tree/b3b03719036ae1ce2cec48609063d58c87de4298
CREStereo	CREStereo architecture with all layers	Trained on in house dataset and finetuned on eth3d	li2022practical	https://github.com/megvii-research/CREStereo/tree/ad3a1613bdedd88b93247e5f002cb7c80799762d
DeepPruner_Best	DeepPruner architecture with all layers. “Best” variant has more parameters and process the images at a higher resolution	finetuned on KITTI 2015	duggal2019deep	https://github.com/uber-research/DeepPruner/tree/40b188cf954577e21d5068db2be2bedc6b0e8781
DeepPruner_Fast	DeepPruner architecture with all layers. “Fast” variant has less parameters and process the images at a lower resolution	finetuned on KITTI 2015	duggal2019deep	https://github.com/uber-research/DeepPruner/tree/40b188cf954577e21d5068db2be2bedc6b0e8781
DeepPruner_Best_norefine	DeepPruner architecture without the final refinement module. “Best” variant has more parameters and process the images at a higher resolution	finetuned on KITTI 2015	duggal2019deep	https://github.com/uber-research/DeepPruner/tree/40b188cf954577e21d5068db2be2bedc6b0e8781
DeepPruner_Fast_norefine	DeepPruner architecture without the final refinement module. “Fast” variant has less parameters and process the images at a lower resolution	finetuned on KITTI 2015	duggal2019deep	https://github.com/uber-research/DeepPruner/tree/40b188cf954577e21d5068db2be2bedc6b0e8781
GANet	GANet architecture with all layers	finetuned on KITTI 2015	zhang2019GANet	https://github.com/feihuzhang/GANet/tree/0d9d94fa9016c741eafc7044a9764ee2b16c59ab
GANetLvl1	GANet second disparity level with intermediate refinement	finetuned on KITTI 2015	zhang2019GANet	https://github.com/feihuzhang/GANet/tree/0d9d94fa9016c741eafc7044a9764ee2b16c59ab
GANetLvl0	GANet initial disparity level with minimal refinement	finetuned on KITTI 2015	zhang2019GANet	https://github.com/feihuzhang/GANet/tree/0d9d94fa9016c741eafc7044a9764ee2b16c59ab
GwcNet	GwcNet architecture with all layers	finetuned on KITTI 2015	guo2019group	https://github.com/xy-guo/GwcNet/tree/0987074f48b098c6e975a58ca5aacf233b0fb0eb
GwcNetLvl0	GwcNet initial disparity level with minimal refinement	finetuned on KITTI 2015	guo2019group	https://github.com/xy-guo/GwcNet/tree/0987074f48b098c6e975a58ca5aacf233b0fb0eb
GwcNetLvl1	GwcNet second disparity level	finetuned on KITTI 2015	guo2019group	https://github.com/xy-guo/GwcNet/tree/0987074f48b098c6e975a58ca5aacf233b0fb0eb
GwcNetLvl2	GwcNet third disparity level	finetuned on KITTI 2015	guo2019group	https://github.com/xy-guo/GwcNet/tree/0987074f48b098c6e975a58ca5aacf233b0fb0eb
HighResStereo	HighResStereo architecture with all layers	finetuned on KITTI 2015	yang2019hsm	https://github.com/gengshan-y/high-res-stereo/tree/cb60fde567066f59caea709dca1ac26b2ea27380
HighResStereoLvl2	HighResStereo second disparity level with intermediate refinement	finetuned on KITTI 2015	yang2019hsm	https://github.com/gengshan-y/high-res-stereo/tree/cb60fde567066f59caea709dca1ac26b2ea27380
HighResStereoLvl3	HighResStereo initial disparity level with minimal refinement	finetuned on KITTI 2015	yang2019hsm	https://github.com/gengshan-y/high-res-stereo/tree/cb60fde567066f59caea709dca1ac26b2ea27380
Lac-GwcNet	Lac-GwcNet architecture with all layers	finetuned on KITTI 2015	Liu_Yu_Long_2022	https://github.com/SpadeLiu/Lac-GwcNet/tree/2d432ad14549edd8934890df7352badd20194607
Lac-GwcNetNoRefine	Lac-GwcNet initial disparity level with minimal refinement	finetuned on KITTI 2015	Liu_Yu_Long_2022	https://github.com/SpadeLiu/Lac-GwcNet/tree/2d432ad14549edd8934890df7352badd20194607
MobileStereoNet2D	Full MobileStereoNet 2D model (no 3D convolutions of cost volume)	finetuned on KITTI 2015	shamsafar2022mobilestereonet	https://github.com/cogsys-tuebingen/mobilestereonet/tree/3c2931ab87561535469206bc366b942af67a2230
MobileStereoNet2DLvl0	MobileStereoNet 2D initial disparity level with minimal refinement	finetuned on KITTI 2015	shamsafar2022mobilestereonet	https://github.com/cogsys-tuebingen/mobilestereonet/tree/3c2931ab87561535469206bc366b942af67a2230
MobileStereoNet2DLvl1	MobileStereoNet 2D second disparity level	finetuned on KITTI 2015	shamsafar2022mobilestereonet	https://github.com/cogsys-tuebingen/mobilestereonet/tree/3c2931ab87561535469206bc366b942af67a2230
MobileStereoNet2DLvl2	MobileStereoNet 2D third disparity level	finetuned on KITTI 2015	shamsafar2022mobilestereonet	https://github.com/cogsys-tuebingen/mobilestereonet/tree/3c2931ab87561535469206bc366b942af67a2230
MobileStereoNet3D	Full MobileStereoNet 3D model (3D convolutions of cost volume)	finetuned on KITTI 2015	shamsafar2022mobilestereonet	https://github.com/cogsys-tuebingen/mobilestereonet/tree/3c2931ab87561535469206bc366b942af67a2230
MobileStereoNet3DLvl0	MobileStereoNet 3D initial disparity level with minimal refinement	finetuned on KITTI 2015	shamsafar2022mobilestereonet	https://github.com/cogsys-tuebingen/mobilestereonet/tree/3c2931ab87561535469206bc366b942af67a2230
MobileStereoNet3DLvl1	MobileStereoNet 3D second disparity level	finetuned on KITTI 2015	shamsafar2022mobilestereonet	https://github.com/cogsys-tuebingen/mobilestereonet/tree/3c2931ab87561535469206bc366b942af67a2230
MobileStereoNet3DLvl2	MobileStereoNet 3D third disparity level	finetuned on KITTI 2015	shamsafar2022mobilestereonet	https://github.com/cogsys-tuebingen/mobilestereonet/tree/3c2931ab87561535469206bc366b942af67a2230
PSMNet	PSMNet architecture with all layers	finetuned on KITTI 2015	chang2018pyramid	https://github.com/JiaRenChang/PSMNet/tree/87ac9093afbf6545c093bd9d26c5ffd66e49a7b8
PSMNetLvl1	PSMNet second disparity level with intermediate refinement	finetuned on KITTI 2015	chang2018pyramid	https://github.com/JiaRenChang/PSMNet/tree/87ac9093afbf6545c093bd9d26c5ffd66e49a7b8
PSMNetLvl0	PSMNet initial disparity level with minimal refinement	finetuned on KITTI 2015	chang2018pyramid	https://github.com/JiaRenChang/PSMNet/tree/87ac9093afbf6545c093bd9d26c5ffd66e49a7b8
RAFT-Stereo	RAFT-Stereo architecture with all layers	trained on SceneFlow	lipson2021raft	https://github.com/princeton-vl/RAFT-Stereo/tree/0e2a12746143a7552e30ef2f4b1d4c3214388a1a
RealTimeStereo	RealTimeStereo architecture with all layers	finetuned on KITTI 2015	chang2020ACCV	https://github.com/JiaRenChang/RealtimeStereo/tree/67d622785c8560a66a4917db0b3bb7ddfd7e127b
RealTimeStereoLvl1	RealTimeStereo second disparity level with intermediate refinement	finetuned on KITTI 2015	chang2020ACCV	https://github.com/JiaRenChang/RealtimeStereo/tree/67d622785c8560a66a4917db0b3bb7ddfd7e127b
RealTimeStereoLvl0	RealTimeStereo initial disparity level with minimal refinement	finetuned on KITTI 2015	chang2020ACCV	https://github.com/JiaRenChang/RealtimeStereo/tree/67d622785c8560a66a4917db0b3bb7ddfd7e127b
SMD-Net	SMD-Net architecture with all layers (and PSMNet backbone)	Trained on UnrealStereo4k and finetuned on KITTI 2015	Tosi2021CVPR	https://github.com/fabiotosi92/SMD-Nets/tree/fbc646834af50b73a754be32cc76d8149b3ddd0a
SRH-Net	SRH-Net architecture with all layers	finetuned on KITTI 2015	Hongzhi2021SRH	https://github.com/hongzhidu/SRHNet
StereoNet	StereoNet architecture with all layers	trained on SceneFlow	khamis2018stereonet	https://github.com/meteorshowers/X-StereoLab/tree/ff8ec7e3c96625cb85b91bcc657829970e316e1f
StereoNetNoRefineModule	StereoNet architecture without the final refinement module	trained on SceneFlow	khamis2018stereonet	https://github.com/meteorshowers/X-StereoLab/tree/ff8ec7e3c96625cb85b91bcc657829970e316e1f
StereoNetFt	StereoNet architecture with all layers	trained on SceneFlow and then finetuned on Active-Passive SimStereo1	khamis2018stereonet	https://github.com/meteorshowers/X-StereoLab/tree/ff8ec7e3c96625cb85b91bcc657829970e316e1f
StereoNetFtNoRefineModule	StereoNet and then finetuned on Active-Passive SimStereo1) architecture without the final refinement module	trained on SceneFlow and then finetuned on Active-Passive SimStereo1	khamis2018stereonet	https://github.com/meteorshowers/X-StereoLab/tree/ff8ec7e3c96625cb85b91bcc657829970e316e1f
ActiveStereoNet	StereoNet architecture with all layers	trained, in a self supervised manner, on RealSense active stereo images	zhang2018ECCV	https://github.com/meteorshowers/X-StereoLab/tree/ff8ec7e3c96625cb85b91bcc657829970e316e1f
ActiveStereoNetNoRefineModule	StereoNet architecture without the final refinement module	trained, in a self supervised manner, on RealSense active stereo images	zhang2018ECCV	https://github.com/meteorshowers/X-StereoLab/tree/ff8ec7e3c96625cb85b91bcc657829970e316e1f
	1Only methods that failed to generalize to active stereo were finetuned on our dataset. We used the active stereo images to perform the finetuning.
Performance metrics
Name	Description		Note
MAE	Mean Absolute error over all pixels in the image		Lower indicate better performance
RMSE	Root Mean Square Error over all pixels in the image		Lower indicate better performance
BAD0.5	Proportion of pixels in the image with an absolute error above 0.5 pixels		Lower indicate better performance
BAD1	Proportion of pixels in the image with an absolute error above 1 pixels		Lower indicate better performance
BAD2	Proportion of pixels in the image with an absolute error above 2 pixels		Lower indicate better performance
BAD4	Proportion of pixels in the image with an absolute error above 4 pixels		Lower indicate better performance
MAE_edges	Mean Absolute error over pixels in the image that are considered edge pixels (see below which pixels are considered edge pixels)		Lower indicate better performance
RMSE_edges	Root Mean Square Error over pixels in the image that are considered edge pixels (see below which pixels are considered edge pixels)		Lower indicate better performance
BAD0.5_edges	Proportion of edge pixels in the image with an absolute error above 0.5 pixels (see below which pixels are considered edge pixels)		Lower indicate better performance
BAD1_edges	Proportion of edge pixels in the image with an absolute error above 1 pixels (see below which pixels are considered edge pixels)		Lower indicate better performance
BAD2_edges	Proportion of edge pixels in the image with an absolute error above 2 pixels (see below which pixels are considered edge pixels)		Lower indicate better performance
BAD4_edges	Proportion of edge pixels in the image with an absolute error above 4 pixels (see below which pixels are considered edge pixels)		Lower indicate better performance
MAE_flat	Mean Absolute error over pixels in the image that are considered non-edge pixels (see below which pixels are considered non-edge pixels)		Lower indicate better performance
RMSE_flat	Root Mean Square Error over pixels in the image that are considered non-edge pixels (see below which pixels are considered non-edge pixels)		Lower indicate better performance
BAD0.5_flat	Proportion of non-edge pixels in the image with an absolute error above 0.5 pixels (see below which pixels are considered non-edge pixels)		Lower indicate better performance
BAD1_flat	Proportion of non-edge pixels in the image with an absolute error above 1 pixels (see below which pixels are considered non-edge pixels)		Lower indicate better performance
BAD2_flat	Proportion of non-edge pixels in the image with an absolute error above 2 pixels (see below which pixels are considered non-edge pixels)		Lower indicate better performance
BAD4_flat	Proportion of non-edge pixels in the image with an absolute error above 4 pixels (see below which pixels are considered non-edge pixels)		Lower indicate better performance
Edge and non-edge pixels
An important feature of stereo models is their ability of reconstructing edges properly. To measure this, we included edge and non-edges restricted metrics in our benchmark.
Edges can be detected using a standard high-pass filter [-1, -1, -1; -1, 8, -1; -1, -1, -1]. We take the absolute value of the resulting filtered images applied to the ground truth disparity signal and any pixel with a value above 2 is considered to be an edge. A morphological dilation with a 21x21 pixels square is then applied on the resulting binary mask to get the final selection of edge pixel…
Relative performance indicators
Name	Description		Note
propImprovedImgs(Metric)	Proportion of images in the test set where the corresponding metic, from the metrics described above, has improved.		Higher indicate better generalization to active stereo
averageRelativeImprovement(Metric)	Average improvement over all images in the test set of the corresponding metric.		Higher indicate better generalization to active stereo

## Sheet: Aggregated Performance
aggregated results:
Method	Active/passive	MAE	RMSE	BAD0.5	BAD1	BAD2	BAD4	MAE_edges	RMSE_edges	BAD0.5_edges	BAD1_edges	BAD2_edges	BAD4_edges	MAE_flat	RMSE_flat	BAD0.5_flat	BAD1_flat	BAD2_flat	BAD4_flat
AANet	Passive	4.07	8.35	0.66	0.45	0.3	0.2	4.71	10.38	0.67	0.47	0.33	0.21	3.67	6.35	0.66	0.43	0.29	0.2
AANetUnrefined	Passive	16.25	18.01	0.99	0.99	0.97	0.91	16.52	18.3	0.99	0.99	0.98	0.92	16.07	17.71	0.99	0.99	0.97	0.91
ACVNet	Passive	4	9.22	0.36	0.25	0.17	0.12	3.18	8.27	0.38	0.24	0.16	0.11	4.33	9.13	0.34	0.25	0.18	0.14
ACVNetLvl0	Passive	10.11	22.5	0.4	0.29	0.22	0.18	5.77	16.16	0.41	0.28	0.19	0.14	12.3	24.59	0.38	0.29	0.24	0.2
ACVNetLvl1	Passive	6.23	14.34	0.37	0.26	0.19	0.14	4.1	11.1	0.39	0.26	0.17	0.12	7.18	15.13	0.35	0.27	0.2	0.15
ACVNet-ft	Passive	2.4	4.73	0.37	0.26	0.19	0.14	2.28	4.97	0.4	0.27	0.18	0.12	2.44	4.15	0.35	0.26	0.2	0.15
AnyNet	Passive	5.31	8.8	0.84	0.69	0.46	0.29	5.35	9.15	0.85	0.71	0.49	0.31	5.2	8.18	0.84	0.68	0.44	0.29
AnyNetLvl1	Passive	5.68	9.11	0.87	0.76	0.55	0.33	5.71	9.42	0.88	0.77	0.57	0.35	5.56	8.5	0.87	0.75	0.54	0.32
AnyNetLvl0	Passive	5.79	9.04	0.89	0.78	0.59	0.35	5.64	9.07	0.89	0.79	0.61	0.35	5.78	8.64	0.89	0.78	0.59	0.35
CascadeStereo	Passive	4.95	10.12	0.66	0.39	0.23	0.16	4.07	9.63	0.66	0.39	0.21	0.14	5.35	9.9	0.66	0.39	0.24	0.18
CascadeStereoStage2	Passive	4.95	10.12	0.66	0.39	0.23	0.16	4.07	9.63	0.66	0.39	0.21	0.14	5.35	9.9	0.66	0.39	0.24	0.18
CascadeStereoStage1	Passive	4.92	9.72	0.82	0.64	0.31	0.15	4.29	9.77	0.82	0.63	0.31	0.14	5.18	9.18	0.82	0.64	0.31	0.16
CascadeStereoFt	Passive	4.37	8.13	0.57	0.38	0.28	0.23	3.45	7.23	0.57	0.36	0.24	0.17	4.88	8.25	0.57	0.39	0.3	0.26
CascadeStereoFtStage2	Passive	4.37	8.13	0.57	0.38	0.28	0.23	3.45	7.23	0.57	0.36	0.24	0.17	4.88	8.25	0.57	0.39	0.3	0.26
CascadeStereoFtStage1	Passive	4.15	7.78	0.71	0.48	0.27	0.17	3.61	7.47	0.71	0.49	0.26	0.15	4.38	7.53	0.7	0.48	0.28	0.18
CREStereo	Passive	0.71	1.75	0.21	0.14	0.08	0.04	0.81	2.12	0.24	0.15	0.08	0.04	0.63	1.23	0.19	0.13	0.08	0.04
DeepPruner_Best	Passive	3.8	7.1	0.5	0.34	0.24	0.17	3.62	7.39	0.56	0.37	0.25	0.17	3.81	6.4	0.47	0.32	0.23	0.18
DeepPruner_Fast	Passive	4.69	7.88	0.67	0.47	0.32	0.22	4.29	7.85	0.7	0.5	0.33	0.21	4.79	7.4	0.65	0.45	0.31	0.23
DeepPruner_Best_norefine	Passive	3.78	7.02	0.51	0.34	0.24	0.17	3.6	7.29	0.56	0.38	0.25	0.17	3.8	6.35	0.47	0.32	0.23	0.18
DeepPruner_Fast_norefine	Passive	4.72	7.92	0.66	0.47	0.32	0.22	4.31	7.85	0.69	0.5	0.33	0.21	4.81	7.48	0.64	0.45	0.31	0.23
GANet	Passive	4.01	7.89	0.59	0.39	0.27	0.19	3.75	7.68	0.62	0.42	0.28	0.19	4.04	7.22	0.57	0.38	0.26	0.19
GANetLvl1	Passive	4.07	7.75	0.59	0.4	0.28	0.2	3.9	7.76	0.62	0.44	0.3	0.2	4.12	7.22	0.57	0.38	0.27	0.2
GANetLvl0	Passive	5.59	11.05	0.68	0.48	0.34	0.24	5.32	11.04	0.68	0.49	0.35	0.25	5.81	10.53	0.68	0.47	0.33	0.25
GwcNet	Passive	5.17	10.38	0.74	0.5	0.33	0.22	4.89	10.65	0.74	0.53	0.34	0.21	5.39	9.94	0.74	0.49	0.32	0.23
GwcNetLvl0	Passive	5.54	11.24	0.68	0.49	0.34	0.24	5.14	11.14	0.7	0.52	0.35	0.23	5.9	11.07	0.68	0.47	0.34	0.26
GwcNetLvl1	Passive	5.35	10.76	0.72	0.5	0.33	0.22	4.82	10.22	0.74	0.53	0.34	0.21	5.76	10.75	0.72	0.48	0.33	0.23
GwcNetLvl2	Passive	5.21	10.5	0.73	0.5	0.33	0.22	4.92	10.78	0.73	0.53	0.34	0.21	5.42	9.89	0.73	0.48	0.32	0.23
HighResStereo	Passive	2.94	4.87	0.54	0.37	0.24	0.16	2.74	4.99	0.59	0.4	0.23	0.14	3.01	4.39	0.5	0.35	0.24	0.17
HighResStereoLvl2	Passive	3.53	5.42	0.73	0.55	0.35	0.19	3.42	5.63	0.77	0.59	0.36	0.18	3.5	4.87	0.71	0.52	0.33	0.2
HighResStereoLvl3	Passive	5.22	6.97	0.9	0.81	0.64	0.37	5.2	7.23	0.91	0.81	0.65	0.39	5.14	6.49	0.9	0.81	0.63	0.36
Lac-GwcNet	Passive	3.95	7.71	0.58	0.39	0.26	0.18	3.8	7.97	0.61	0.42	0.27	0.18	3.98	7.02	0.56	0.38	0.25	0.19
Lac-GwcNetNoRefine	Passive	3.95	7.75	0.58	0.39	0.26	0.18	3.81	8.05	0.61	0.42	0.27	0.18	3.98	7.02	0.56	0.38	0.25	0.19
MobileStereoNet2D	Passive	4.49	7.68	0.79	0.59	0.36	0.23	4.39	8.11	0.79	0.59	0.37	0.22	4.53	7.07	0.8	0.59	0.36	0.24
MobileStereoNet2DLvl0	Passive	5.19	9.38	0.8	0.59	0.39	0.27	4.43	8.28	0.78	0.58	0.38	0.24	5.66	9.58	0.81	0.6	0.4	0.29
MobileStereoNet2DLvl1	Passive	4.7	8.14	0.79	0.59	0.38	0.24	4.45	8.21	0.79	0.59	0.38	0.23	4.83	7.77	0.8	0.6	0.38	0.26
MobileStereoNet2DLvl2	Passive	4.58	8.03	0.79	0.58	0.36	0.24	4.49	8.54	0.79	0.59	0.37	0.23	4.64	7.38	0.8	0.58	0.36	0.25
MobileStereoNet3D	Passive	5.06	9.81	0.81	0.61	0.38	0.23	4.9	10.19	0.8	0.6	0.38	0.23	5.16	9.3	0.82	0.62	0.38	0.24
MobileStereoNet3DLvl0	Passive	7.26	14.49	0.81	0.61	0.4	0.28	6.06	12.89	0.79	0.6	0.41	0.26	8.08	15.03	0.82	0.62	0.41	0.29
MobileStereoNet3DLvl1	Passive	5.51	11.35	0.79	0.59	0.38	0.24	5.21	11.25	0.79	0.59	0.39	0.24	5.69	10.94	0.8	0.6	0.38	0.25
MobileStereoNet3DLvl2	Passive	5.23	10.52	0.81	0.61	0.38	0.23	5.05	10.8	0.8	0.6	0.39	0.23	5.36	10.09	0.82	0.62	0.38	0.24
PSMNet	Passive	4.23	6.57	0.93	0.82	0.45	0.21	4.33	6.97	0.93	0.82	0.48	0.22	4.13	5.93	0.93	0.82	0.43	0.21
PSMNetLvl1	Passive	4.32	6.87	0.93	0.82	0.45	0.21	4.48	7.39	0.93	0.82	0.48	0.22	4.19	6.12	0.93	0.82	0.43	0.21
PSMNetLvl0	Passive	4.8	8.17	0.93	0.83	0.46	0.23	4.84	8.44	0.93	0.83	0.49	0.23	4.73	7.59	0.93	0.82	0.43	0.22
RAFT-Stereo	Passive	2.96	5.31	0.47	0.34	0.24	0.17	3.16	5.89	0.55	0.4	0.27	0.17	2.86	4.6	0.42	0.31	0.23	0.16
RealTimeStereo	Passive	4.71	7.69	0.8	0.64	0.44	0.28	4.67	7.81	0.81	0.65	0.45	0.27	4.59	7.2	0.79	0.62	0.43	0.28
RealTimeStereoLvl1	Passive	4.89	7.75	0.83	0.68	0.49	0.31	4.89	7.9	0.84	0.7	0.5	0.3	4.76	7.26	0.82	0.67	0.48	0.3
RealTimeStereoLvl0	Passive	4.9	7.67	0.84	0.7	0.51	0.31	4.96	7.92	0.85	0.71	0.52	0.31	4.73	7.14	0.84	0.69	0.49	0.31
SMD-Nets	Passive	6.48	12.32	0.77	0.58	0.4	0.27	5.54	11.51	0.77	0.58	0.39	0.24	6.98	12.39	0.78	0.58	0.41	0.29
SRHNet	Passive	4.24	7.43	0.76	0.49	0.29	0.19	3.78	7.05	0.75	0.5	0.3	0.19	4.44	7.18	0.77	0.49	0.28	0.2
StereoNet	Passive	4.11	10.98	0.55	0.37	0.26	0.18	3.77	12.43	0.61	0.41	0.26	0.17	4.31	8.84	0.5	0.34	0.25	0.18
StereoNetNoRefineModule	Passive	4.38	10.06	0.57	0.39	0.27	0.19	3.87	9.42	0.63	0.43	0.28	0.18	4.67	9.61	0.52	0.35	0.25	0.19
StereoNetFt	Passive	5.21	11.9	0.72	0.53	0.35	0.24	4.64	11.91	0.74	0.55	0.36	0.22	5.75	11.28	0.71	0.51	0.35	0.24
StereoNetFtNoRefineModule	Passive	5.79	12.24	0.71	0.53	0.36	0.25	4.56	9.83	0.73	0.55	0.35	0.23	6.8	13.3	0.7	0.51	0.36	0.26
ActiveStereoNet	Passive	9.39	21.57	0.6	0.46	0.35	0.28	5.96	12.98	0.68	0.51	0.37	0.26	11.8	25.44	0.55	0.42	0.34	0.29
ActiveStereoNetNoRefineModule	Passive	9.46	21.49	0.67	0.48	0.36	0.28	5.97	12.66	0.72	0.54	0.38	0.26	11.89	25.44	0.64	0.44	0.35	0.29
AANet	Active	2.02	6.73	0.43	0.2	0.12	0.08	3.49	9.73	0.52	0.32	0.21	0.14	1	3.14	0.36	0.12	0.06	0.04
AANetUnrefined	Active	16.58	18.12	1	1	0.99	0.93	16.73	18.39	1	0.99	0.98	0.93	16.52	17.86	1	1	0.99	0.93
ACVNet	Active	1.31	3.49	0.23	0.13	0.08	0.05	1.85	4.38	0.35	0.2	0.12	0.08	0.86	2.34	0.14	0.08	0.04	0.03
ACVNetLvl0	Active	2.01	6	0.26	0.16	0.1	0.07	2.49	6.6	0.41	0.24	0.14	0.1	1.62	4.98	0.16	0.1	0.07	0.05
ACVNetLvl1	Active	1.45	3.97	0.25	0.14	0.08	0.06	2.03	4.88	0.38	0.21	0.13	0.08	0.98	2.81	0.15	0.09	0.05	0.04
ACVNet-ft	Active	0.66	2.16	0.17	0.07	0.04	0.03	1.1	3.09	0.29	0.14	0.07	0.05	0.27	0.66	0.07	0.02	0.01	0.01
AnyNet	Active	3.43	6.13	0.8	0.61	0.32	0.18	4.46	7.57	0.84	0.68	0.45	0.26	2.69	4.66	0.78	0.57	0.24	0.13
AnyNetLvl1	Active	4	6.55	0.86	0.72	0.49	0.25	4.97	7.95	0.88	0.77	0.56	0.32	3.32	5.19	0.84	0.69	0.44	0.2
AnyNetLvl0	Active	4.21	6.57	0.87	0.75	0.54	0.28	4.99	7.71	0.9	0.79	0.6	0.34	3.66	5.46	0.86	0.72	0.5	0.25
CascadeStereo	Active	2.07	4.48	0.64	0.33	0.14	0.08	2.55	5.28	0.67	0.4	0.19	0.11	1.64	3.43	0.61	0.28	0.1	0.06
CascadeStereoStage2	Active	2.07	4.48	0.64	0.33	0.14	0.08	2.55	5.28	0.67	0.4	0.19	0.11	1.64	3.43	0.61	0.28	0.1	0.06
CascadeStereoStage1	Active	2.36	4.7	0.81	0.61	0.24	0.07	2.89	5.63	0.82	0.63	0.3	0.1	1.89	3.54	0.8	0.59	0.18	0.04
CascadeStereoFt	Active	0.47	1.68	0.12	0.05	0.03	0.02	0.78	2.43	0.21	0.1	0.05	0.03	0.21	0.52	0.05	0.01	0	0
CascadeStereoFtStage2	Active	0.47	1.68	0.12	0.05	0.03	0.02	0.78	2.43	0.21	0.1	0.05	0.03	0.21	0.52	0.05	0.01	0	0
CascadeStereoFtStage1	Active	0.72	2	0.3	0.12	0.05	0.02	1.13	2.8	0.44	0.2	0.09	0.04	0.37	0.72	0.19	0.04	0.02	0
CREStereo	Active	0.32	1.44	0.07	0.04	0.02	0.01	0.59	2.08	0.13	0.07	0.04	0.03	0.08	0.34	0.01	0.01	0	0
DeepPruner_Best	Active	1.12	3.17	0.23	0.12	0.07	0.05	1.83	4.4	0.38	0.21	0.13	0.09	0.5	1.25	0.12	0.04	0.02	0.02
DeepPruner_Fast	Active	1.92	4.29	0.41	0.23	0.13	0.09	2.66	5.35	0.59	0.36	0.2	0.13	1.28	2.82	0.29	0.13	0.07	0.05
DeepPruner_Best_norefine	Active	1.1	3.02	0.24	0.13	0.08	0.05	1.8	4.18	0.4	0.23	0.14	0.09	0.5	1.19	0.12	0.05	0.02	0.02
DeepPruner_Fast_norefine	Active	1.93	4.24	0.4	0.23	0.14	0.09	2.69	5.25	0.59	0.37	0.22	0.14	1.28	2.84	0.27	0.13	0.08	0.05
GANet	Active	1.56	5.05	0.27	0.14	0.09	0.07	2.38	6.24	0.43	0.24	0.15	0.11	0.91	3.56	0.16	0.06	0.04	0.03
GANetLvl1	Active	1.57	4.81	0.28	0.15	0.1	0.07	2.38	6.02	0.44	0.25	0.16	0.11	0.92	3.33	0.17	0.07	0.05	0.03
GANetLvl0	Active	2.46	6.7	0.43	0.21	0.13	0.1	3.59	8.55	0.55	0.35	0.22	0.17	1.61	4.38	0.35	0.11	0.07	0.05
GwcNet	Active	1.8	4.41	0.53	0.24	0.11	0.08	2.57	5.52	0.61	0.36	0.19	0.12	1.17	2.78	0.46	0.15	0.06	0.04
GwcNetLvl0	Active	2	5.04	0.45	0.23	0.13	0.09	2.84	6.19	0.6	0.38	0.21	0.13	1.34	3.46	0.34	0.13	0.07	0.05
GwcNetLvl1	Active	1.7	4.13	0.5	0.23	0.12	0.08	2.48	5.24	0.61	0.37	0.19	0.12	1.07	2.58	0.42	0.13	0.06	0.04
GwcNetLvl2	Active	1.74	4.26	0.51	0.23	0.11	0.07	2.5	5.39	0.6	0.36	0.18	0.12	1.11	2.63	0.44	0.14	0.05	0.04
HighResStereo	Active	1.3	3.11	0.38	0.2	0.1	0.05	1.86	3.99	0.56	0.32	0.16	0.08	0.83	1.85	0.25	0.11	0.05	0.03
HighResStereoLvl2	Active	2.47	4.36	0.68	0.47	0.25	0.11	2.95	5.11	0.76	0.57	0.34	0.15	2.04	3.31	0.63	0.4	0.2	0.09
HighResStereoLvl3	Active	5.4	7.04	0.9	0.81	0.65	0.4	5.37	7.27	0.91	0.82	0.66	0.41	5.33	6.62	0.9	0.81	0.65	0.4
Lac-GwcNet	Active	1.25	3.34	0.31	0.14	0.08	0.05	1.77	4.19	0.43	0.24	0.14	0.09	0.78	1.66	0.21	0.07	0.03	0.02
Lac-GwcNetNoRefine	Active	1.24	3.36	0.3	0.14	0.08	0.05	1.76	4.22	0.41	0.23	0.13	0.09	0.78	1.67	0.21	0.07	0.03	0.02
MobileStereoNet2D	Active	2.11	4.44	0.7	0.38	0.14	0.08	2.84	5.67	0.72	0.48	0.22	0.13	1.49	2.75	0.67	0.31	0.07	0.04
MobileStereoNet2DLvl0	Active	2.19	5.15	0.66	0.35	0.14	0.09	3.02	6.51	0.72	0.47	0.24	0.14	1.52	3.24	0.61	0.25	0.07	0.05
MobileStereoNet2DLvl1	Active	2.16	4.65	0.68	0.38	0.15	0.09	2.91	5.9	0.72	0.48	0.24	0.13	1.55	3.02	0.65	0.3	0.08	0.05
MobileStereoNet2DLvl2	Active	2.2	5.07	0.68	0.37	0.14	0.09	3.08	6.79	0.72	0.48	0.23	0.13	1.53	2.9	0.65	0.29	0.07	0.05
MobileStereoNet3D	Active	1.88	4.37	0.59	0.28	0.13	0.08	2.65	5.77	0.64	0.39	0.2	0.13	1.3	2.65	0.55	0.21	0.07	0.05
MobileStereoNet3DLvl0	Active	2.93	7.38	0.6	0.31	0.17	0.11	3.65	8.48	0.66	0.43	0.26	0.16	2.52	5.85	0.55	0.23	0.1	0.07
MobileStereoNet3DLvl1	Active	2.08	5.01	0.54	0.27	0.13	0.09	2.8	6.16	0.64	0.39	0.21	0.13	1.52	3.48	0.48	0.19	0.08	0.05
MobileStereoNet3DLvl2	Active	1.95	4.64	0.58	0.29	0.13	0.08	2.67	5.91	0.64	0.39	0.21	0.13	1.41	3.05	0.54	0.21	0.08	0.05
PSMNet	Active	2.32	3.94	0.93	0.8	0.27	0.07	3.04	5.21	0.92	0.79	0.37	0.12	1.73	2.29	0.94	0.8	0.2	0.03
PSMNetLvl1	Active	2.32	3.93	0.93	0.8	0.28	0.07	3.03	5.2	0.92	0.79	0.37	0.13	1.73	2.28	0.94	0.8	0.2	0.03
PSMNetLvl0	Active	2.43	4.23	0.93	0.81	0.28	0.08	3.19	5.5	0.92	0.8	0.39	0.13	1.81	2.63	0.93	0.82	0.2	0.03
RAFT-Stereo	Active	1.25	3.35	0.25	0.16	0.1	0.07	2.05	4.61	0.4	0.26	0.17	0.11	0.64	1.69	0.14	0.08	0.05	0.04
RealTimeStereo	Active	2.87	5.3	0.72	0.5	0.28	0.15	3.87	6.57	0.79	0.62	0.4	0.22	2.09	3.92	0.67	0.42	0.2	0.1
RealTimeStereoLvl1	Active	3.17	5.48	0.77	0.59	0.36	0.19	4.17	6.72	0.83	0.68	0.47	0.26	2.41	4.17	0.74	0.52	0.29	0.13
RealTimeStereoLvl0	Active	3.33	5.56	0.8	0.62	0.4	0.21	4.27	6.75	0.85	0.71	0.49	0.28	2.6	4.31	0.77	0.57	0.33	0.15
SMD-Nets	Active	2.24	5.26	0.63	0.34	0.15	0.09	2.86	6.25	0.68	0.43	0.22	0.13	1.75	3.78	0.59	0.27	0.09	0.05
SRHNet	Active	1.59	3.95	0.57	0.21	0.09	0.05	2.25	4.97	0.62	0.32	0.16	0.09	1.04	2.36	0.53	0.13	0.04	0.02
StereoNet	Active	1.79	7.74	0.44	0.23	0.12	0.07	2.91	11.48	0.61	0.39	0.21	0.12	0.95	2.88	0.32	0.12	0.05	0.03
StereoNetNoRefineModule	Active	1.75	5.75	0.41	0.21	0.11	0.07	2.82	7.94	0.58	0.36	0.2	0.12	0.95	2.99	0.28	0.1	0.04	0.03
StereoNetFt	Active	1.79	6.57	0.54	0.3	0.14	0.07	2.89	9.86	0.68	0.45	0.24	0.13	0.96	2.42	0.45	0.18	0.06	0.03
StereoNetFtNoRefineModule	Active	1.76	4.75	0.56	0.31	0.15	0.08	2.64	6.42	0.68	0.45	0.25	0.13	1.07	2.76	0.48	0.21	0.07	0.03
ActiveStereoNet	Active	2.32	6.92	0.36	0.22	0.14	0.09	3.48	7.74	0.61	0.4	0.25	0.16	1.37	5.37	0.18	0.09	0.05	0.04
ActiveStereoNetNoRefineModule	Active	2.43	6.86	0.49	0.24	0.14	0.09	3.52	7.61	0.65	0.44	0.26	0.17	1.53	5.41	0.37	0.11	0.06	0.04

## Sheet: Relative performance indicators
relative indicators results:
Method	propImprovedImgs(MAE)	propImprovedImgs(RMSE)	propImprovedImgs(BAD0.5)	propImprovedImgs(BAD1)	propImprovedImgs(BAD2)	propImprovedImgs(BAD4)	propImprovedImgs(MAE_edges)	propImprovedImgs(RMSE_edges)	propImprovedImgs(BAD0.5_edges)	propImprovedImgs(BAD1_edges)	propImprovedImgs(BAD2_edges)	propImprovedImgs(BAD4_edges)	propImprovedImgs(MAE_flat)	propImprovedImgs(RMSE_flat)	propImprovedImgs(BAD0.5_flat)	propImprovedImgs(BAD1_flat)	propImprovedImgs(BAD2_flat)	propImprovedImgs(BAD4_flat)	averageRelativeImprovement(MAE)	averageRelativeImprovement(RMSE)	averageRelativeImprovement(BAD0.5)	averageRelativeImprovement(BAD1)	averageRelativeImprovement(BAD2)	averageRelativeImprovement(BAD4)	averageRelativeImprovement(MAE_edges)	averageRelativeImprovement(RMSE_edges)	averageRelativeImprovement(BAD0.5_edges)	averageRelativeImprovement(BAD1_edges)	averageRelativeImprovement(BAD2_edges)	averageRelativeImprovement(BAD4_edges)	averageRelativeImprovement(MAE_flat)	averageRelativeImprovement(RMSE_flat)	averageRelativeImprovement(BAD0.5_flat)	averageRelativeImprovement(BAD1_flat)	averageRelativeImprovement(BAD2_flat)	averageRelativeImprovement(BAD4_flat)
AANet	0.8738	0.6311	0.9806	0.9806	0.9903	0.9417	0.7282	0.534	0.9806	0.9806	0.9709	0.8932	0.9709	0.8835	0.9515	0.9806	0.9709	0.9515	0.3515	0.1097	0.3553	0.5316	0.5486	0.4841	0.1787	0.0322	0.217	0.3195	0.3567	0.2822	0.5599	0.4019	0.4651	0.7228	0.7524	0.7174
AANetUnrefined	0.3981	0.4757	0.3883	0.3786	0.3689	0.3689	0.3592	0.4175	0.4369	0.4078	0.3981	0.3981	0.3981	0.4466	0.2621	0.2718	0.2621	0.3204	-0.0174	-0.0051	-0.0031	-0.0057	-0.012	-0.0209	-0.0101	-0.0034	-0.0018	-0.0034	-0.0074	-0.0125	-0.0267	-0.0082	-0.0054	-0.0099	-0.0207	-0.0288
ACVNet	0.7087	0.6311	0.8058	0.7476	0.7379	0.6602	0.5825	0.5631	0.6019	0.6893	0.6699	0.5922	0.835	0.7573	0.8738	0.835	0.8155	0.6699	0.3002	0.2413	0.2865	0.3551	0.3726	0.2781	0.1485	0.1517	0.0601	0.1558	0.2145	0.1493	0.4577	0.3878	0.506	0.5638	0.5375	0.4238
ACVNetLvl0	0.7282	0.7184	0.7767	0.8252	0.7961	0.7573	0.6699	0.6893	0.5049	0.6699	0.699	0.7184	0.835	0.7961	0.8738	0.9029	0.8641	0.8155	0.4274	0.4036	0.2771	0.3696	0.4185	0.4314	0.2878	0.3304	0.009	0.1169	0.2132	0.2578	0.5549	0.4901	0.5172	0.618	0.6103	0.5828
ACVNetLvl1	0.7184	0.6796	0.7961	0.8155	0.7476	0.699	0.6311	0.6019	0.5534	0.6699	0.6796	0.6408	0.8155	0.7864	0.8738	0.8738	0.8447	0.7767	0.3424	0.3081	0.2798	0.3692	0.3932	0.3563	0.1961	0.2287	0.0313	0.1446	0.2168	0.2123	0.4865	0.4321	0.5046	0.5846	0.5716	0.5304
ACVNet-ft	0.8641	0.8252	0.8932	0.9126	0.9029	0.8544	0.835	0.7961	0.835	0.8544	0.8738	0.7961	0.8932	0.9126	0.932	0.9417	0.9223	0.7961	0.4782	0.4222	0.4667	0.6007	0.6362	0.5721	0.3599	0.3177	0.2354	0.4187	0.4964	0.46	0.6145	0.6461	0.6997	0.8207	0.8429	0.7424
AnyNet	0.932	0.8932	0.8835	0.9417	0.9806	0.9515	0.9126	0.8641	0.7864	0.8252	0.8835	0.9223	0.9515	0.932	0.835	0.9223	0.9806	0.9612	0.2936	0.2655	0.0418	0.107	0.2928	0.3877	0.1598	0.1685	0.0186	0.04	0.0845	0.1706	0.3989	0.3823	0.0588	0.1552	0.4599	0.5859
AnyNetLvl1	0.8835	0.8738	0.7476	0.8058	0.8447	0.9029	0.8155	0.835	0.5631	0.5728	0.5922	0.7573	0.8835	0.8835	0.767	0.7961	0.8641	0.9223	0.2215	0.2295	0.0201	0.0489	0.1125	0.2404	0.1133	0.1459	0.0043	0.0085	0.0164	0.0601	0.2997	0.3132	0.0308	0.076	0.18	0.3808
AnyNetLvl0	0.835	0.8447	0.7573	0.7573	0.7961	0.8155	0.7961	0.7864	0.4854	0.466	0.5728	0.6505	0.8738	0.8544	0.7767	0.7864	0.7961	0.8544	0.2003	0.2189	0.0184	0.0407	0.0935	0.1903	0.0997	0.1408	-0.0014	-0.0005	0.0123	0.0519	0.2693	0.2864	0.0324	0.07	0.1534	0.293
CascadeStereo	0.6505	0.6505	0.534	0.6311	0.7087	0.6311	0.5922	0.5728	0.3786	0.4757	0.6214	0.5728	0.7379	0.7379	0.6311	0.7573	0.8058	0.767	0.2469	0.2653	0.0258	0.1055	0.2819	0.2718	0.16	0.2143	-0.0226	-0.0144	0.1185	0.1347	0.3307	0.3378	0.0591	0.1956	0.4445	0.4495
CascadeStereoStage2	0.6505	0.6505	0.534	0.6311	0.7087	0.6311	0.5922	0.5728	0.3786	0.4757	0.6214	0.5728	0.7379	0.7379	0.6311	0.7573	0.8058	0.767	0.2469	0.2653	0.0258	0.1055	0.2819	0.2718	0.16	0.2143	-0.0226	-0.0144	0.1185	0.1347	0.3307	0.3378	0.0591	0.1956	0.4445	0.4495
CascadeStereoStage1	0.699	0.699	0.5631	0.6214	0.6699	0.7184	0.6311	0.6699	0.4854	0.4951	0.5146	0.6117	0.7864	0.8058	0.6117	0.6796	0.7282	0.8058	0.2222	0.2705	0.012	0.0378	0.164	0.3592	0.1544	0.2233	0.0008	0.0049	0.0228	0.1893	0.2911	0.324	0.023	0.0648	0.2813	0.5518
CascadeStereoFt	0.9903	0.9806	0.9903	1	0.9903	0.9612	0.9903	0.9806	0.9903	1	0.9806	0.9612	0.9903	0.9806	0.9806	0.9903	0.9709	0.9612	0.7794	0.7081	0.7585	0.8157	0.8218	0.8349	0.689	0.6147	0.6098	0.7064	0.729	0.7557	0.8605	0.8636	0.8825	0.9261	0.9222	0.9269
CascadeStereoFtStage2	0.9903	0.9806	0.9903	1	0.9903	0.9612	0.9903	0.9806	0.9903	1	0.9806	0.9612	0.9903	0.9806	0.9806	0.9903	0.9709	0.9612	0.7794	0.7081	0.7585	0.8157	0.8218	0.8349	0.689	0.6147	0.6098	0.7064	0.729	0.7558	0.8605	0.8636	0.8825	0.9261	0.9222	0.9269
CascadeStereoFtStage1	1	0.9709	1	1	0.9709	0.9515	0.9903	0.9709	0.9903	1	0.9709	0.9612	0.9903	0.9903	0.9903	1	0.9612	0.9515	0.6782	0.6182	0.5691	0.7436	0.7656	0.7683	0.5747	0.5336	0.3725	0.5682	0.6476	0.6842	0.777	0.7871	0.7201	0.9034	0.8997	0.8932
CREStereo	0.7961	0.6602	0.9029	0.767	0.6214	0.5049	0.7184	0.4951	0.8544	0.7379	0.6019	0.4563	0.932	0.9126	0.9223	0.7961	0.6505	0.466	0.4136	0.1847	0.5597	0.4582	0.3351	0.1394	0.2503	0.0696	0.4004	0.3497	0.2537	0.0661	0.6296	0.5932	0.8008	0.6873	0.5578	0.3866
DeepPruner_Best	0.9417	0.9223	0.9709	1	0.9709	0.8932	0.9417	0.9223	0.9806	0.9903	0.9806	0.8738	0.9612	0.9515	0.9612	1	0.9612	0.8544	0.5216	0.4141	0.5088	0.6045	0.6177	0.5352	0.388	0.3186	0.3064	0.4115	0.4549	0.3987	0.6865	0.6636	0.7094	0.8412	0.878	0.7873
DeepPruner_Fast	0.9515	0.932	0.9806	0.9903	0.9709	0.9126	0.932	0.8932	0.9515	0.9806	0.9515	0.9029	0.9612	0.9612	0.9806	0.9806	0.9806	0.8835	0.4744	0.3761	0.3785	0.5083	0.5612	0.538	0.3235	0.2728	0.1524	0.2774	0.3803	0.3923	0.6198	0.5629	0.5475	0.715	0.7585	0.714
DeepPruner_Best_norefine	0.9417	0.9417	0.9806	1	0.9806	0.8932	0.9612	0.9223	0.9709	1	0.9709	0.9029	0.9709	0.9515	0.9612	0.9903	0.9515	0.8544	0.5248	0.426	0.499	0.5884	0.6105	0.5395	0.3916	0.3325	0.284	0.3893	0.4395	0.4027	0.688	0.6677	0.7109	0.8189	0.8623	0.7857
DeepPruner_Fast_norefine	0.9515	0.932	0.9806	0.9903	0.9709	0.932	0.9515	0.9126	0.9029	0.9709	0.9515	0.9223	0.9612	0.9417	0.9806	0.9806	0.9806	0.9126	0.4761	0.3838	0.3837	0.4967	0.5441	0.5319	0.3221	0.283	0.1425	0.2532	0.3499	0.3788	0.6248	0.5618	0.5664	0.7177	0.7578	0.7318
GANet	0.8738	0.7476	0.9903	0.9709	0.9612	0.8932	0.8544	0.7379	0.9806	0.9806	0.9515	0.9029	0.9029	0.767	0.9806	0.9806	0.9612	0.8835	0.4304	0.265	0.5201	0.6081	0.5888	0.5333	0.3153	0.1915	0.2984	0.4133	0.4373	0.4019	0.554	0.3672	0.7036	0.8042	0.7696	0.69
GANetLvl1	0.9126	0.7864	0.9806	0.9709	0.9612	0.932	0.8835	0.7573	0.9806	0.9806	0.9709	0.932	0.9223	0.835	0.9612	0.9709	0.9515	0.8932	0.4475	0.2881	0.5059	0.5972	0.5792	0.5241	0.32	0.2002	0.2863	0.4027	0.4292	0.3862	0.5803	0.4157	0.6895	0.7929	0.7546	0.6903
GANetLvl0	0.9515	0.8738	0.9709	0.9806	0.9806	0.9612	0.9515	0.8641	0.9612	0.9709	0.9709	0.9515	0.9515	0.8932	0.9709	0.9903	0.9806	0.9417	0.4668	0.33	0.3516	0.5463	0.5675	0.5249	0.2945	0.2039	0.1824	0.2944	0.3499	0.3179	0.6165	0.519	0.4727	0.7502	0.7663	0.7278
GwcNet	0.9903	0.9709	1	0.9903	0.9903	0.9709	0.9612	0.9417	0.9806	0.9903	0.9903	0.9612	0.9903	0.9806	0.9903	1	1	0.9515	0.5478	0.5128	0.2874	0.5193	0.6298	0.6227	0.4352	0.4292	0.1746	0.3137	0.4525	0.4646	0.6588	0.6625	0.3762	0.6959	0.8115	0.8175
GwcNetLvl0	0.9709	0.9223	0.9903	0.9903	0.9903	0.9806	0.9709	0.9417	0.9903	0.9903	0.9903	0.9806	0.9709	0.9417	0.9806	0.9903	0.9903	0.9612	0.5699	0.5177	0.3455	0.5116	0.6048	0.6312	0.4159	0.416	0.1423	0.2583	0.3962	0.4367	0.7068	0.6678	0.5035	0.7241	0.7913	0.8007
GwcNetLvl1	0.9709	0.9515	1	1	0.9903	0.9515	0.9709	0.9515	0.9806	0.9903	0.9903	0.9612	0.9709	0.9612	0.9903	1	0.9806	0.932	0.5645	0.5328	0.3081	0.5282	0.6279	0.6339	0.4394	0.4409	0.1652	0.3037	0.4494	0.4758	0.6756	0.6659	0.4184	0.7229	0.811	0.7958
GwcNetLvl2	0.9903	0.9709	0.9903	1	0.9903	0.9612	0.9806	0.932	0.9806	0.9903	0.9903	0.9709	0.9903	0.9806	0.9806	1	1	0.9417	0.5556	0.5228	0.3012	0.5272	0.6325	0.6281	0.4438	0.4383	0.1789	0.3157	0.4582	0.4745	0.6617	0.6593	0.3976	0.7098	0.8154	0.8089
HighResStereo	0.8447	0.767	0.8544	0.8932	0.8544	0.7864	0.7476	0.7087	0.6408	0.7961	0.8155	0.7282	0.9223	0.8932	0.932	0.932	0.9223	0.7282	0.3597	0.2843	0.2664	0.3917	0.4876	0.4433	0.2005	0.1669	0.0477	0.1613	0.312	0.3261	0.5099	0.4777	0.4543	0.6168	0.6817	0.5957
HighResStereoLvl2	0.7184	0.7087	0.7379	0.7573	0.767	0.6893	0.6408	0.6117	0.5146	0.5631	0.6796	0.6117	0.8155	0.8058	0.7767	0.8252	0.767	0.7379	0.1909	0.1518	0.0708	0.1257	0.2164	0.2558	0.0882	0.0759	0.0097	0.0226	0.0675	0.1427	0.2715	0.2413	0.1079	0.1983	0.3269	0.3356
HighResStereoLvl3	0.466	0.4854	0.4757	0.4854	0.4466	0.3786	0.3883	0.4757	0.4466	0.4272	0.4078	0.3592	0.4951	0.5243	0.4951	0.534	0.5049	0.3883	-0.021	-0.0055	0.0005	-0.0016	-0.0135	-0.0335	-0.0197	-0.0026	-0.0008	-0.0059	-0.0214	-0.0335	-0.0283	-0.0184	0.0004	-0.0004	-0.0144	-0.0442
Lac-GwcNet	0.9612	0.932	0.9806	0.9903	0.9612	0.9417	0.9709	0.9223	0.9806	0.9903	0.9612	0.9612	0.9612	0.9417	0.9709	0.9612	0.9417	0.8835	0.5476	0.4735	0.4724	0.6093	0.6272	0.6078	0.4413	0.3906	0.2962	0.4143	0.4733	0.4773	0.6801	0.6832	0.6414	0.8094	0.8026	0.7817
Lac-GwcNetNoRefine	0.9612	0.932	0.9806	0.9903	0.9709	0.9515	0.9709	0.9417	0.9806	0.9903	0.9709	0.9612	0.9515	0.9417	0.9709	0.9612	0.9417	0.8835	0.5531	0.4783	0.484	0.6212	0.637	0.6116	0.4514	0.3986	0.3185	0.4384	0.4918	0.4821	0.6821	0.6835	0.6437	0.8096	0.8009	0.7801
MobileStereoNet2D	0.9612	0.9223	0.8932	0.9709	0.9903	0.9709	0.9612	0.9126	0.9515	0.9515	0.9709	0.9709	0.9709	0.932	0.7961	0.9417	0.9903	0.9709	0.4492	0.4049	0.1354	0.3603	0.5866	0.6103	0.328	0.3047	0.0908	0.1986	0.3827	0.4372	0.5632	0.5688	0.1769	0.4979	0.7886	0.8179
MobileStereoNet2DLvl0	0.9709	0.9612	0.9417	0.9806	0.9709	0.9709	0.9806	0.8447	0.9223	0.9709	0.9709	0.9806	0.9806	0.9806	0.9029	0.9709	0.9709	0.9709	0.5186	0.4352	0.1783	0.4146	0.6132	0.6523	0.3056	0.2269	0.0769	0.1859	0.3642	0.4336	0.6691	0.658	0.2572	0.587	0.8162	0.8334
MobileStereoNet2DLvl1	0.9515	0.9223	0.8932	0.9709	0.9806	0.9612	0.9515	0.8835	0.9126	0.932	0.9709	0.9612	0.9709	0.9515	0.8738	0.9709	0.9806	0.9709	0.4756	0.4202	0.1547	0.371	0.5922	0.6248	0.3308	0.2998	0.0817	0.1833	0.3693	0.4428	0.5998	0.5975	0.2129	0.5229	0.7924	0.8144
MobileStereoNet2DLvl2	0.9515	0.8738	0.8641	0.9612	0.9806	0.9612	0.9029	0.8058	0.8932	0.932	0.9709	0.9515	0.9612	0.932	0.8058	0.9515	0.9806	0.9709	0.4428	0.3439	0.1519	0.3699	0.585	0.5956	0.2825	0.2181	0.0858	0.1931	0.3675	0.396	0.5813	0.582	0.208	0.5158	0.7894	0.8109
MobileStereoNet3D	0.9612	0.9126	0.9806	0.9806	0.9903	0.9806	0.9515	0.9029	0.9806	0.9806	0.9903	0.9709	0.9806	0.9417	0.9709	0.9806	0.9903	0.9709	0.5163	0.407	0.29	0.5407	0.6475	0.6147	0.3918	0.3029	0.205	0.3646	0.4678	0.4615	0.6387	0.5968	0.3591	0.6794	0.8154	0.7946
MobileStereoNet3DLvl0	0.932	0.8932	0.9709	0.9806	0.9806	0.9515	0.932	0.835	0.9417	0.9806	0.9903	0.9515	0.932	0.9029	0.9709	0.9806	0.9709	0.9709	0.5367	0.456	0.2748	0.4864	0.5694	0.5696	0.3705	0.3255	0.1701	0.2751	0.3664	0.3782	0.6581	0.6012	0.3561	0.6446	0.7398	0.7416
MobileStereoNet3DLvl1	0.9709	0.932	0.9806	0.9806	0.9903	0.9903	0.9515	0.932	0.9515	0.9806	0.9806	0.9806	0.9806	0.932	0.9612	0.9806	0.9903	0.9806	0.5457	0.4674	0.3262	0.5388	0.6315	0.6237	0.4205	0.3816	0.1956	0.3393	0.446	0.4638	0.6625	0.6088	0.4243	0.6926	0.8036	0.7974
MobileStereoNet3DLvl2	0.9612	0.9029	0.9806	0.9806	0.9903	0.9806	0.9612	0.8932	0.9806	0.9806	0.9903	0.9709	0.9709	0.9417	0.9612	0.9806	0.9903	0.9806	0.524	0.4268	0.2953	0.5349	0.6406	0.6201	0.4015	0.3313	0.2037	0.3539	0.4594	0.4636	0.6427	0.5965	0.3692	0.6762	0.8101	0.8065
PSMNet	0.9029	0.9223	0.4369	0.6602	0.932	0.9417	0.932	0.8835	0.5728	0.7282	0.932	0.9223	0.932	0.932	0.3107	0.5825	0.9417	0.932	0.3046	0.294	0.0006	0.0407	0.3804	0.5837	0.2237	0.2045	0.0072	0.0405	0.2237	0.4252	0.3801	0.4161	-0.0015	0.0429	0.5271	0.7672
PSMNetLvl1	0.932	0.932	0.4175	0.6214	0.9417	0.9417	0.9223	0.8932	0.5437	0.7184	0.932	0.9223	0.9612	0.9515	0.2913	0.534	0.932	0.9612	0.3164	0.319	0.0009	0.0379	0.3778	0.5926	0.242	0.2381	0.0083	0.0428	0.2242	0.4302	0.3879	0.4312	-0.0019	0.0374	0.5234	0.8081
PSMNetLvl0	0.9612	0.9515	0.3883	0.5534	0.9417	0.9417	0.9417	0.8932	0.5825	0.7184	0.9417	0.932	0.9709	0.9612	0.2718	0.4563	0.9417	0.9806	0.3599	0.4035	0.0024	0.0265	0.3727	0.6106	0.2793	0.3188	0.0084	0.0398	0.2087	0.4365	0.4324	0.5099	0.0006	0.0198	0.5239	0.83
RAFT-Stereo	0.9709	0.8932	0.9806	0.9709	0.932	0.9029	0.9223	0.835	0.9709	0.9709	0.9223	0.8835	0.9903	0.9612	0.9903	0.9709	0.9515	0.8252	0.4607	0.3215	0.4556	0.4992	0.5193	0.4887	0.3113	0.2191	0.262	0.3262	0.3739	0.3669	0.6351	0.5405	0.6615	0.7219	0.7307	0.6024
RealTimeStereo	0.9223	0.8738	0.9612	0.9515	0.9709	0.932	0.8447	0.7767	0.7476	0.8252	0.8641	0.8835	0.9515	0.9223	0.9612	0.9612	0.9806	0.9515	0.3444	0.3009	0.0989	0.2114	0.3519	0.4667	0.1629	0.1572	0.0205	0.0511	0.1203	0.2207	0.4688	0.429	0.1494	0.3211	0.5236	0.6455
RealTimeStereoLvl1	0.9029	0.8544	0.9417	0.932	0.9515	0.9223	0.7961	0.7379	0.5534	0.6214	0.7379	0.8252	0.9515	0.9126	0.9612	0.9417	0.9709	0.9417	0.3024	0.2727	0.0682	0.1444	0.2615	0.3853	0.1348	0.1402	0.0101	0.025	0.0664	0.1375	0.4138	0.3843	0.1067	0.2241	0.3954	0.5521
RealTimeStereoLvl0	0.8932	0.8447	0.8641	0.9029	0.9223	0.8932	0.7767	0.7379	0.4951	0.5728	0.6408	0.7184	0.9126	0.8932	0.9126	0.9126	0.9223	0.9223	0.2681	0.2458	0.0498	0.1093	0.2107	0.3311	0.1231	0.135	0.0036	0.013	0.0486	0.1095	0.3674	0.3424	0.0819	0.1753	0.3207	0.4809
SMD-Nets	0.9515	0.9126	0.8932	0.9515	0.9709	0.9806	0.9417	0.8835	0.9515	0.9612	0.9709	0.9612	0.9806	0.9417	0.8544	0.9417	0.9903	0.9709	0.5393	0.4846	0.1945	0.413	0.6039	0.6445	0.4183	0.3896	0.1257	0.2538	0.4164	0.4782	0.646	0.6303	0.2534	0.5426	0.7669	0.7995
SRHNet	0.9709	0.9126	0.9126	0.9709	0.9806	0.9806	0.9417	0.9223	0.9612	0.9806	0.9417	0.9612	0.9709	0.932	0.8835	0.9709	0.9806	0.9612	0.4778	0.3973	0.2649	0.5497	0.6401	0.635	0.3591	0.2901	0.1826	0.3605	0.4615	0.4729	0.5852	0.5714	0.3272	0.7062	0.8389	0.8379
StereoNet	0.835	0.8058	0.7864	0.835	0.8544	0.8155	0.7573	0.7573	0.5534	0.6699	0.7573	0.767	0.9223	0.932	0.8155	0.8738	0.9223	0.9223	0.3774	0.1982	0.1758	0.3224	0.4501	0.4634	0.1606	0.0597	0.0027	0.0643	0.1862	0.2346	0.5415	0.5101	0.3101	0.5431	0.6873	0.6921
StereoNetNoRefineModule	0.9126	0.9029	0.9029	0.932	0.932	0.9417	0.8738	0.8835	0.8447	0.8932	0.9126	0.8932	0.932	0.932	0.9126	0.932	0.9417	0.9417	0.4383	0.2987	0.2614	0.4199	0.516	0.5225	0.2277	0.1257	0.0732	0.1609	0.2689	0.3098	0.5873	0.5375	0.4128	0.6465	0.7358	0.718
StereoNetFt	0.932	0.8835	0.9126	0.9612	0.9515	0.9223	0.8932	0.7864	0.8155	0.8835	0.932	0.932	0.9806	0.9612	0.9417	0.9612	0.9417	0.9515	0.5325	0.336	0.2398	0.4232	0.5607	0.6157	0.3249	0.1392	0.0803	0.1825	0.3315	0.4105	0.6851	0.6551	0.3529	0.6099	0.7537	0.7878
StereoNetFtNoRefineModule	0.9612	0.9417	0.9223	0.9515	0.9515	0.9417	0.9126	0.8932	0.8447	0.9126	0.9223	0.9417	0.9612	0.9515	0.9417	0.9612	0.9612	0.9417	0.5697	0.5027	0.2106	0.3948	0.5522	0.6252	0.3677	0.2988	0.0797	0.1732	0.3074	0.4244	0.6948	0.6709	0.302	0.5595	0.7382	0.7766
ActiveStereoNet	0.9903	0.9515	1	1	0.9903	0.9806	0.9709	0.932	0.9709	1	0.9806	0.9709	0.9612	0.9515	1	1	1	0.9709	0.6782	0.6277	0.398	0.5071	0.5841	0.6354	0.4275	0.4335	0.1045	0.2281	0.342	0.4082	0.8013	0.7273	0.6554	0.764	0.7951	0.8148
ActiveStereoNetNoRefineModule	0.9903	0.9515	0.9903	1	1	0.9806	0.9612	0.932	0.9126	0.9612	0.9903	0.9806	0.9612	0.9515	0.9903	1	0.9903	0.9709	0.6626	0.6284	0.2692	0.4761	0.582	0.639	0.4223	0.4321	0.0915	0.1965	0.3408	0.4172	0.7769	0.7229	0.4072	0.7299	0.7971	0.8174

## Sheet: Performance Per Images
Detailled results:
Method	Image	MAE-passive	MAE-active	RMSE-passive	RMSE-active	BAD0.5-passive	BAD0.5-active	BAD1-passive	BAD1-active	BAD2-passive	BAD2-active	BAD4-passive	BAD4-active	MAE_edges-passive	MAE_edges-active	RMSE_edges-passive	RMSE_edges-active	BAD0.5_edges-passive	BAD0.5_edges-active	BAD1_edges-passive	BAD1_edges-active	BAD2_edges-passive	BAD2_edges-active	BAD4_edges-passive	BAD4_edges-active	MAE_flat-passive	MAE_flat-active	RMSE_flat-passive	RMSE_flat-active	BAD0.5_flat-passive	BAD0.5_flat-active	BAD1_flat-passive	BAD1_flat-active	BAD2_flat-passive	BAD2_flat-active	BAD4_flat-passive	BAD4_flat-active
AnyNet	abstract_bowls_1	2.91	2.54	4.32	3.99	0.88	0.84	0.72	0.68	0.47	0.37	0.21	0.17	3.47	3.29	5.09	4.86	0.88	0.87	0.76	0.75	0.53	0.52	0.27	0.25	2.43	1.89	3.51	3.03	0.87	0.82	0.69	0.62	0.41	0.25	0.16	0.1
AnyNet	abstract_bowls_14	2.7	1.58	3.98	2.54	0.85	0.76	0.69	0.54	0.44	0.2	0.21	0.07	2.5	2.16	3.79	3.39	0.84	0.8	0.69	0.63	0.41	0.33	0.17	0.13	2.82	1.23	4.09	1.83	0.85	0.74	0.69	0.49	0.46	0.12	0.23	0.04
AnyNet	bones_3	6.22	4.79	11.03	8.73	0.87	0.85	0.73	0.71	0.48	0.44	0.31	0.27	6.48	5.81	11.33	10.11	0.86	0.85	0.72	0.71	0.49	0.5	0.32	0.33	5.64	2.55	10.35	4.43	0.89	0.85	0.78	0.7	0.47	0.31	0.27	0.14
AnyNet	bones_6	7.04	9.34	12	15.82	0.87	0.85	0.76	0.72	0.56	0.53	0.38	0.4	7.62	10.3	12.85	16.82	0.88	0.87	0.77	0.76	0.57	0.57	0.39	0.43	4.86	5.71	8.06	11.34	0.85	0.76	0.74	0.57	0.55	0.38	0.36	0.26
AnyNet	Chairs4	4.06	3.92	5.38	5.49	0.88	0.86	0.77	0.73	0.59	0.53	0.42	0.39	4.52	4.45	5.77	5.91	0.91	0.89	0.82	0.78	0.67	0.61	0.48	0.46	2.59	2.27	3.94	3.89	0.8	0.76	0.62	0.55	0.35	0.25	0.22	0.17
AnyNet	chess_8	2.57	1.72	3.88	2.55	0.81	0.78	0.65	0.57	0.37	0.25	0.21	0.1	2.92	2.26	4.28	3.24	0.83	0.8	0.69	0.64	0.45	0.39	0.25	0.17	2.23	1.19	3.45	1.62	0.8	0.76	0.61	0.49	0.3	0.11	0.16	0.03
AnyNet	childroom_1	1.39	1.3	1.91	1.81	0.77	0.75	0.55	0.51	0.2	0.16	0.05	0.04	1.76	1.7	2.47	2.42	0.78	0.78	0.58	0.55	0.31	0.28	0.1	0.1	1.13	1.01	1.38	1.22	0.76	0.74	0.53	0.48	0.12	0.07	0.01	0
AnyNet	childroom_12	4.22	2.25	6.85	4.42	0.87	0.78	0.73	0.52	0.49	0.21	0.31	0.13	5.71	3.22	8.66	5.81	0.9	0.79	0.79	0.61	0.6	0.34	0.43	0.21	2.74	1.3	4.4	2.34	0.84	0.77	0.67	0.43	0.38	0.09	0.19	0.04
AnyNet	childroom_2	4.41	3.59	8.91	8.49	0.86	0.82	0.73	0.64	0.5	0.32	0.28	0.17	5.52	5.5	11.29	11.35	0.84	0.85	0.74	0.72	0.56	0.5	0.31	0.3	3.38	1.83	5.92	4.43	0.89	0.79	0.73	0.57	0.45	0.15	0.24	0.05
AnyNet	childroom_4	1.37	1.24	2.23	1.89	0.71	0.7	0.47	0.47	0.17	0.15	0.05	0.04	1.69	1.53	2.76	2.37	0.76	0.74	0.52	0.52	0.23	0.22	0.09	0.07	1.05	0.95	1.5	1.24	0.65	0.65	0.41	0.41	0.12	0.08	0.02	0.01
AnyNet	childroom_6	1.47	1.27	2.12	1.91	0.79	0.73	0.57	0.47	0.2	0.15	0.04	0.04	1.84	1.68	2.67	2.47	0.85	0.81	0.66	0.6	0.29	0.25	0.08	0.07	1.14	0.91	1.5	1.25	0.74	0.66	0.49	0.36	0.13	0.06	0.01	0.01
AnyNet	childroom_9	2.91	1.92	4.71	3.19	0.82	0.78	0.62	0.53	0.36	0.25	0.23	0.12	3.82	2.9	5.92	4.4	0.87	0.85	0.72	0.69	0.44	0.42	0.31	0.24	2.38	1.37	3.85	2.22	0.79	0.74	0.56	0.43	0.31	0.15	0.19	0.06
AnyNet	cloth4	4.9	2.6	10.33	5.08	0.77	0.77	0.6	0.54	0.39	0.27	0.28	0.17	6.37	4.65	12.83	8.08	0.85	0.86	0.72	0.75	0.48	0.46	0.32	0.29	4.51	2.05	9.56	3.92	0.75	0.75	0.57	0.49	0.37	0.22	0.27	0.14
AnyNet	cloth6	2.91	1.78	5.2	3.03	0.87	0.81	0.69	0.58	0.38	0.22	0.18	0.08	3.9	2.72	6.85	4.41	0.9	0.84	0.73	0.67	0.5	0.43	0.25	0.16	2.44	1.33	4.18	2.07	0.86	0.8	0.67	0.53	0.32	0.12	0.14	0.03
AnyNet	cloth7	9.44	2.87	16.4	4.96	0.84	0.8	0.68	0.57	0.53	0.3	0.49	0.19	5.69	3.2	11.73	5.57	0.77	0.77	0.55	0.54	0.33	0.32	0.29	0.22	12.59	2.59	19.49	4.38	0.89	0.82	0.79	0.61	0.7	0.29	0.67	0.17
AnyNet	coral6	2.95	1.91	4.64	3.06	0.86	0.82	0.66	0.6	0.4	0.24	0.22	0.11	4.31	3.01	6.17	4.41	0.91	0.87	0.77	0.73	0.56	0.45	0.37	0.24	2.11	1.23	3.35	1.78	0.83	0.79	0.59	0.52	0.3	0.1	0.13	0.03
AnyNet	dining_room_1_1	8.87	8.26	14.3	13.62	0.88	0.89	0.77	0.76	0.65	0.6	0.48	0.43	9.46	9.43	15.33	15.28	0.89	0.88	0.78	0.77	0.63	0.62	0.46	0.45	8.03	6.58	12.69	10.83	0.86	0.9	0.74	0.73	0.68	0.58	0.5	0.41
AnyNet	office_top5	2.13	1.65	2.96	2.41	0.82	0.81	0.65	0.57	0.39	0.23	0.14	0.08	2.66	2.45	3.76	3.49	0.83	0.82	0.68	0.66	0.45	0.41	0.22	0.2	1.84	1.23	2.42	1.54	0.82	0.8	0.63	0.53	0.36	0.14	0.09	0.02
AnyNet	park1	1.77	1.57	2.91	2.41	0.8	0.8	0.57	0.55	0.25	0.23	0.07	0.06	2.07	1.94	3.44	2.95	0.87	0.86	0.65	0.64	0.3	0.3	0.08	0.08	1.45	1.18	2.21	1.65	0.72	0.73	0.49	0.46	0.2	0.15	0.07	0.03
AnyNet	park10	2.41	2.25	3.93	3.76	0.81	0.81	0.63	0.61	0.36	0.31	0.16	0.14	3	2.85	4.69	4.54	0.84	0.83	0.69	0.68	0.45	0.42	0.23	0.2	1.35	1.15	1.9	1.54	0.75	0.76	0.52	0.5	0.2	0.11	0.04	0.02
AnyNet	park6	4.58	3.77	8.57	8.05	0.83	0.82	0.68	0.64	0.43	0.33	0.29	0.19	8.33	8.08	13.5	13.49	0.88	0.87	0.77	0.74	0.6	0.58	0.47	0.43	2.68	1.58	4.28	2.31	0.81	0.8	0.64	0.59	0.35	0.2	0.2	0.07
AnyNet	person1_1	15.88	5.16	23.23	9.52	0.86	0.78	0.77	0.6	0.68	0.36	0.59	0.27	12.18	8.7	17.45	13.28	0.86	0.87	0.75	0.74	0.6	0.56	0.55	0.46	17.05	4.04	24.78	7.96	0.86	0.76	0.78	0.56	0.7	0.29	0.6	0.21
AnyNet	person1_3	4.73	3.89	9.54	9.03	0.9	0.88	0.78	0.74	0.56	0.39	0.28	0.2	7.77	7.02	13.68	13.71	0.94	0.92	0.86	0.84	0.71	0.65	0.48	0.41	3.1	2.21	6.31	4.98	0.89	0.86	0.74	0.68	0.48	0.25	0.17	0.09
AnyNet	person1_8	7.91	3.22	14.16	5.45	0.78	0.78	0.63	0.61	0.51	0.34	0.4	0.23	8.44	5.47	14.51	8.08	0.76	0.78	0.64	0.66	0.55	0.56	0.48	0.43	7.78	2.67	14.08	4.59	0.79	0.78	0.63	0.59	0.5	0.29	0.38	0.18
AnyNet	person2_5	2.74	1.42	5.34	2.28	0.8	0.75	0.61	0.52	0.37	0.18	0.17	0.05	3.04	1.89	6.16	3.1	0.83	0.75	0.67	0.57	0.4	0.32	0.17	0.09	2.57	1.16	4.81	1.64	0.78	0.76	0.58	0.49	0.35	0.1	0.17	0.02
AnyNet	person3_10	2.85	1.97	5.03	3.17	0.83	0.82	0.66	0.61	0.37	0.24	0.18	0.11	4.08	3.59	6.26	5.17	0.87	0.87	0.76	0.74	0.55	0.53	0.34	0.29	2.4	1.38	4.49	1.99	0.82	0.8	0.63	0.56	0.3	0.14	0.13	0.05
AnyNet	person3_3	3.38	1.99	5.3	3.43	0.79	0.75	0.62	0.55	0.43	0.25	0.29	0.12	4.22	3.75	6.43	5.74	0.82	0.85	0.66	0.72	0.5	0.51	0.36	0.3	3.1	1.39	4.87	2.17	0.78	0.72	0.61	0.49	0.4	0.17	0.26	0.05
AnyNet	person3_4	3.8	3.09	7.31	5.9	0.82	0.8	0.64	0.61	0.34	0.3	0.21	0.17	5.43	5.11	9.35	8.28	0.83	0.85	0.69	0.71	0.47	0.51	0.32	0.33	2.87	1.94	5.83	3.96	0.81	0.77	0.61	0.56	0.27	0.18	0.15	0.08
AnyNet	plant_vintage12	3.95	2.62	5.99	4.24	0.86	0.82	0.72	0.66	0.48	0.36	0.32	0.17	3.98	3.26	6.15	5.08	0.85	0.83	0.72	0.69	0.47	0.45	0.31	0.25	3.9	1.48	5.69	2.05	0.88	0.79	0.74	0.62	0.5	0.2	0.33	0.04
AnyNet	plant_vintage14	2.98	1.33	5.49	1.95	0.79	0.75	0.56	0.54	0.34	0.16	0.2	0.04	3.16	1.84	6.24	2.92	0.78	0.77	0.56	0.54	0.3	0.27	0.19	0.11	2.9	1.12	5.16	1.38	0.79	0.74	0.56	0.53	0.36	0.11	0.21	0.01
AnyNet	plant_vintage15	3.31	1.24	7.22	1.86	0.76	0.76	0.55	0.49	0.28	0.12	0.17	0.03	3.45	1.69	7.65	2.76	0.76	0.75	0.56	0.5	0.3	0.23	0.16	0.09	3.24	1.05	7.01	1.27	0.77	0.76	0.55	0.49	0.27	0.07	0.17	0.01
AnyNet	plant_vintage2	3.04	2.15	6.47	4.18	0.78	0.77	0.59	0.55	0.37	0.25	0.18	0.12	3.11	2.6	6.86	5.18	0.79	0.73	0.59	0.53	0.34	0.28	0.18	0.16	3	1.89	6.24	3.48	0.77	0.79	0.59	0.55	0.39	0.24	0.19	0.09
AnyNet	plant_vintage4	3.81	1.89	7.76	3.46	0.78	0.77	0.6	0.55	0.36	0.23	0.22	0.09	3.87	2.3	8.27	4.23	0.79	0.74	0.61	0.53	0.37	0.31	0.21	0.15	3.77	1.64	7.44	2.89	0.77	0.78	0.59	0.56	0.35	0.18	0.22	0.06
AnyNet	plant_vintage7	3.52	2.28	5.51	3.75	0.85	0.82	0.7	0.62	0.47	0.3	0.27	0.14	3.72	3.16	5.52	4.8	0.87	0.85	0.74	0.7	0.52	0.45	0.3	0.24	3.28	1.23	5.5	1.81	0.82	0.78	0.66	0.52	0.4	0.12	0.23	0.02
AnyNet	roundntwist4	4.08	5.82	6.49	10.53	0.91	0.89	0.82	0.78	0.6	0.57	0.32	0.33	3.04	4.27	5.59	8.93	0.87	0.88	0.73	0.76	0.44	0.48	0.18	0.21	5.64	8.16	7.64	12.56	0.99	0.91	0.97	0.83	0.83	0.71	0.52	0.52
AnyNet	ScifiKnot1	2.25	1.86	3.55	2.89	0.74	0.76	0.56	0.55	0.32	0.28	0.18	0.12	3.09	2.74	4.56	4.06	0.82	0.8	0.67	0.64	0.44	0.4	0.28	0.24	1.73	1.33	2.76	1.85	0.69	0.74	0.49	0.5	0.25	0.2	0.13	0.04
AnyNet	ScifiKnot4	4.69	2.68	7.62	5.57	0.86	0.75	0.72	0.55	0.51	0.24	0.33	0.13	6.05	4.66	9.44	7.82	0.89	0.87	0.79	0.72	0.6	0.49	0.39	0.28	4.22	2.01	6.89	4.56	0.84	0.71	0.7	0.49	0.49	0.15	0.31	0.07
AnyNet	sleeping_room_1_11	1.8	1.57	2.6	2.24	0.83	0.81	0.63	0.6	0.29	0.21	0.09	0.06	3	2.64	4.04	3.53	0.92	0.91	0.8	0.77	0.53	0.46	0.24	0.2	1.37	1.18	1.81	1.51	0.8	0.77	0.57	0.54	0.2	0.12	0.03	0.01
AnyNet	living_room_3_5	2.28	1.95	3.54	3.03	0.82	0.79	0.61	0.58	0.33	0.28	0.16	0.13	3.04	2.84	4.43	4.03	0.86	0.87	0.7	0.72	0.46	0.46	0.24	0.23	1.61	1.17	2.49	1.69	0.79	0.72	0.53	0.45	0.21	0.12	0.08	0.03
AnyNet	living_room_3_9	2.01	1.45	3.47	2.32	0.83	0.76	0.62	0.52	0.27	0.19	0.09	0.04	2.66	2.03	4.7	3.37	0.85	0.8	0.68	0.58	0.36	0.29	0.14	0.09	1.67	1.16	2.65	1.55	0.82	0.75	0.58	0.49	0.23	0.14	0.07	0.02
AnyNet	mannequins_10	9.67	10.56	17.58	19.18	0.88	0.81	0.74	0.67	0.54	0.48	0.43	0.39	12.22	14.11	20.66	22.84	0.88	0.88	0.77	0.77	0.62	0.63	0.51	0.52	5.21	4.38	10.2	10.02	0.87	0.7	0.7	0.5	0.4	0.22	0.31	0.17
AnyNet	mannequins_12	6.93	3.93	10.27	7.61	0.88	0.83	0.77	0.64	0.6	0.34	0.49	0.21	6.88	5.4	10.75	9.16	0.87	0.87	0.75	0.73	0.54	0.5	0.41	0.32	6.97	2.49	9.77	5.69	0.9	0.8	0.79	0.55	0.66	0.19	0.56	0.1
AnyNet	mannequins_2	4.58	2.81	7.05	5.22	0.87	0.81	0.74	0.62	0.52	0.35	0.36	0.17	4.24	3.49	6.98	6.19	0.85	0.82	0.73	0.66	0.47	0.41	0.3	0.23	5.23	1.48	7.18	2.34	0.89	0.78	0.75	0.53	0.64	0.21	0.49	0.05
AnyNet	mannequins_5	2.25	1.75	3.16	2.6	0.83	0.78	0.66	0.56	0.38	0.27	0.17	0.1	2.5	2.1	3.55	3.08	0.83	0.78	0.65	0.6	0.41	0.36	0.22	0.15	1.89	1.24	2.48	1.67	0.84	0.78	0.67	0.5	0.34	0.14	0.11	0.02
AnyNet	mannequins_9	4.06	2.89	6.31	4.96	0.85	0.84	0.72	0.66	0.48	0.37	0.33	0.18	3.96	3.4	6.38	5.65	0.83	0.85	0.7	0.68	0.48	0.43	0.3	0.23	4.29	1.77	6.15	2.94	0.87	0.83	0.76	0.62	0.49	0.22	0.41	0.08
AnyNet	Minicubes4	4.8	4.41	7.24	6.99	0.89	0.86	0.76	0.71	0.54	0.47	0.37	0.31	4.6	4.42	7.11	6.94	0.88	0.87	0.74	0.73	0.52	0.49	0.34	0.32	5.18	4.39	7.49	7.1	0.91	0.84	0.79	0.67	0.56	0.42	0.41	0.29
AnyNet	Minicubes5	4.11	3.89	5.73	5.77	0.87	0.87	0.76	0.73	0.56	0.49	0.38	0.34	3.63	3.45	5.32	5.32	0.85	0.85	0.72	0.7	0.51	0.46	0.32	0.29	4.8	4.53	6.27	6.37	0.91	0.91	0.83	0.77	0.64	0.53	0.47	0.41
AnyNet	Minicubes9	3.19	2.09	4.31	3.07	0.88	0.81	0.78	0.66	0.58	0.33	0.27	0.13	3.46	2.64	4.79	3.74	0.86	0.83	0.75	0.69	0.57	0.46	0.3	0.21	2.86	1.39	3.61	1.9	0.9	0.8	0.82	0.61	0.59	0.16	0.22	0.03
AnyNet	moto3	2.45	2.88	3.88	5.37	0.84	0.85	0.68	0.69	0.37	0.35	0.16	0.17	2.88	3	4.59	5.75	0.9	0.88	0.77	0.74	0.45	0.41	0.19	0.17	2.1	2.79	3.21	5.04	0.8	0.83	0.6	0.65	0.31	0.31	0.14	0.17
AnyNet	music1_1	7.58	2.61	16.51	4.67	0.81	0.79	0.67	0.6	0.43	0.28	0.31	0.17	7.44	3.66	16.54	5.98	0.82	0.83	0.71	0.7	0.46	0.45	0.28	0.26	7.65	2.09	16.49	3.86	0.81	0.78	0.65	0.55	0.42	0.19	0.32	0.12
AnyNet	music1_6	4.41	3.71	6.67	6.61	0.87	0.83	0.76	0.69	0.55	0.4	0.37	0.24	5.17	5.03	7.73	8.19	0.88	0.88	0.79	0.76	0.6	0.55	0.42	0.35	3.3	1.76	4.72	3.01	0.84	0.75	0.73	0.57	0.47	0.19	0.3	0.08
AnyNet	music1_7	1.76	1.37	3.21	1.87	0.76	0.77	0.53	0.53	0.25	0.19	0.09	0.05	2.71	2.09	4.68	2.79	0.84	0.8	0.69	0.66	0.45	0.41	0.21	0.14	1.35	1.06	2.31	1.3	0.73	0.76	0.46	0.47	0.17	0.09	0.04	0
AnyNet	music1_9	6	2.35	10.19	4.78	0.87	0.76	0.73	0.52	0.53	0.24	0.36	0.13	5.16	3.96	8.58	6.99	0.89	0.84	0.75	0.71	0.58	0.52	0.36	0.29	6.23	1.89	10.59	3.95	0.86	0.73	0.72	0.47	0.52	0.17	0.36	0.09
AnyNet	nest5	6.28	5.34	21.44	21.2	0.9	0.84	0.8	0.68	0.58	0.44	0.39	0.3	7.78	7.12	27.08	26.9	0.91	0.88	0.81	0.76	0.63	0.57	0.45	0.39	4.5	3.21	11.53	11.08	0.89	0.78	0.78	0.59	0.53	0.29	0.31	0.19
AnyNet	office1	2.56	1.49	5.01	2.49	0.78	0.76	0.58	0.51	0.3	0.19	0.14	0.05	2.51	2.12	4.62	3.59	0.81	0.81	0.61	0.6	0.34	0.3	0.14	0.1	2.58	1.14	5.22	1.56	0.76	0.73	0.56	0.47	0.28	0.13	0.14	0.02
AnyNet	office12	4.6	3.03	6.95	5.45	0.88	0.8	0.76	0.57	0.59	0.3	0.38	0.2	6.17	4.95	8.64	7.62	0.9	0.83	0.81	0.67	0.7	0.51	0.54	0.37	3.77	2.01	5.86	3.83	0.87	0.78	0.74	0.51	0.53	0.18	0.3	0.11
AnyNet	office14	5.2	3.03	9.24	6.23	0.88	0.82	0.73	0.62	0.48	0.32	0.31	0.16	5.7	4.67	9.86	8.86	0.89	0.87	0.77	0.73	0.57	0.47	0.36	0.27	4.85	1.86	8.77	3.26	0.87	0.79	0.69	0.55	0.41	0.21	0.27	0.09
AnyNet	office2	3.74	2.29	7.16	5	0.81	0.8	0.65	0.59	0.42	0.25	0.21	0.09	3.71	3.25	8.16	7.48	0.71	0.73	0.48	0.49	0.27	0.25	0.17	0.17	3.75	1.94	6.75	3.7	0.85	0.82	0.71	0.63	0.48	0.24	0.23	0.06
AnyNet	sleeping_room_1_15	3.24	1.31	7.28	1.74	0.8	0.77	0.61	0.53	0.32	0.18	0.15	0.04	3.14	1.68	7.48	2.21	0.83	0.81	0.65	0.61	0.35	0.31	0.12	0.08	3.32	1.03	7.12	1.25	0.77	0.74	0.59	0.48	0.29	0.07	0.17	0
AnyNet	sleeping_room_1_3	3.41	3.09	9.87	8.89	0.78	0.75	0.58	0.55	0.27	0.24	0.11	0.1	4.57	4.29	11.32	10.47	0.81	0.79	0.66	0.65	0.39	0.38	0.21	0.2	3.03	2.69	9.34	8.3	0.77	0.74	0.55	0.52	0.23	0.19	0.08	0.07
AnyNet	sleeping_room_1_7	2.78	2.15	5.73	4.06	0.78	0.79	0.56	0.52	0.31	0.26	0.16	0.11	3.85	3.39	7.66	6.12	0.77	0.78	0.6	0.58	0.42	0.4	0.25	0.22	2.3	1.58	4.61	2.65	0.78	0.8	0.54	0.48	0.26	0.2	0.12	0.06
AnyNet	spaceStation2	6.79	5.19	10.1	8.52	0.91	0.88	0.83	0.77	0.69	0.59	0.56	0.42	4.91	4.86	8.1	8.04	0.83	0.83	0.67	0.68	0.46	0.46	0.36	0.36	7.74	5.36	10.98	8.75	0.95	0.91	0.91	0.82	0.81	0.66	0.66	0.45
AnyNet	stack_circles4	13.08	4.23	19.36	6.97	0.87	0.85	0.76	0.7	0.63	0.41	0.57	0.27	9.04	5.18	15.9	8.2	0.83	0.85	0.71	0.7	0.54	0.48	0.41	0.33	15.34	3.71	21.05	6.18	0.89	0.85	0.79	0.7	0.68	0.37	0.66	0.23
AnyNet	stack_circles9	12.34	3.6	22.51	6.07	0.92	0.81	0.83	0.63	0.69	0.37	0.6	0.25	7.5	4.9	15.3	7.63	0.88	0.85	0.74	0.69	0.5	0.47	0.4	0.34	15.39	2.77	26.05	4.84	0.94	0.78	0.89	0.58	0.8	0.3	0.72	0.19
AnyNet	time_travellers_10	22.64	16.53	33.42	27.25	0.85	0.8	0.74	0.66	0.61	0.51	0.53	0.43	22.17	19.92	33.7	31.85	0.85	0.84	0.74	0.71	0.59	0.55	0.5	0.44	22.84	15.14	33.3	25.14	0.85	0.78	0.74	0.64	0.62	0.49	0.54	0.42
AnyNet	time_travellers_13	10.24	3.79	13.29	6.37	0.89	0.87	0.83	0.7	0.72	0.36	0.63	0.24	8.62	5.46	12.65	8.26	0.84	0.87	0.74	0.74	0.57	0.54	0.48	0.37	11.35	2.64	13.72	4.64	0.92	0.87	0.89	0.67	0.82	0.24	0.74	0.15
AnyNet	time_travellers_15	15.07	7.39	20.33	12.62	0.93	0.91	0.85	0.81	0.7	0.51	0.62	0.37	12.5	10.48	18.51	15.98	0.91	0.91	0.81	0.82	0.63	0.62	0.52	0.5	16.56	5.61	21.31	10.18	0.95	0.91	0.87	0.8	0.73	0.45	0.67	0.29
AnyNet	time_travellers_2	9.08	5.6	11.98	8.94	0.94	0.81	0.85	0.7	0.69	0.47	0.59	0.37	7.6	6.53	10.9	9.58	0.9	0.88	0.78	0.79	0.64	0.6	0.49	0.45	10.15	4.93	12.7	8.44	0.96	0.76	0.89	0.63	0.73	0.38	0.66	0.31
AnyNet	time_travellers_20	7.15	1.75	9.53	2.75	0.93	0.76	0.86	0.55	0.74	0.25	0.64	0.09	6.72	2.85	10.32	4.15	0.88	0.84	0.76	0.68	0.57	0.45	0.49	0.24	7.36	1.19	9.09	1.62	0.95	0.72	0.92	0.49	0.83	0.15	0.72	0.02
AnyNet	time_travellers_24	27.23	9.25	38.08	20.05	0.93	0.86	0.87	0.69	0.78	0.37	0.67	0.26	23.81	16.93	36.78	29.8	0.89	0.85	0.78	0.71	0.66	0.54	0.55	0.42	28.39	6.64	38.51	15.38	0.95	0.86	0.91	0.69	0.83	0.32	0.71	0.2
AnyNet	time_travellers_25	11.65	6.3	16.98	11.78	0.91	0.86	0.79	0.69	0.59	0.43	0.54	0.33	11.84	9.78	18.42	15.86	0.89	0.91	0.78	0.81	0.6	0.62	0.5	0.47	11.53	3.99	15.96	8.01	0.92	0.83	0.8	0.61	0.59	0.3	0.57	0.23
AnyNet	time_travellers_3	15.91	7.14	21.31	12.32	0.95	0.89	0.87	0.75	0.72	0.49	0.64	0.37	11.87	8.44	17.87	13.84	0.93	0.91	0.81	0.8	0.63	0.6	0.51	0.45	18.93	6.17	23.55	11.05	0.97	0.87	0.91	0.71	0.8	0.42	0.74	0.32
AnyNet	twirls2	2.61	2.18	4.08	3.66	0.8	0.79	0.63	0.59	0.42	0.31	0.21	0.14	3.25	3	4.96	4.85	0.85	0.83	0.71	0.68	0.51	0.43	0.26	0.22	2.2	1.64	3.39	2.61	0.76	0.76	0.58	0.52	0.36	0.23	0.18	0.09
AnyNet	twirls3	3	2.06	5.52	4.06	0.84	0.78	0.66	0.56	0.4	0.25	0.21	0.1	3.54	2.96	6.5	5.61	0.82	0.81	0.66	0.63	0.48	0.39	0.26	0.19	2.73	1.6	4.97	2.99	0.85	0.77	0.66	0.52	0.36	0.18	0.18	0.05
AnyNet	voronoid_sphere6	6.72	6.28	10.93	10.85	0.85	0.86	0.73	0.7	0.58	0.45	0.4	0.32	7.61	8.01	11.9	12.7	0.85	0.87	0.73	0.72	0.6	0.53	0.45	0.41	5.23	3.36	9.05	6.68	0.84	0.85	0.71	0.66	0.55	0.31	0.32	0.16
AnyNet	voronoid_sphere9	5.12	5.28	7.1	7.48	0.91	0.88	0.8	0.75	0.55	0.54	0.44	0.44	4.79	5.07	6.95	7.45	0.9	0.88	0.78	0.73	0.5	0.48	0.38	0.39	7.1	6.56	7.92	7.65	0.95	0.93	0.91	0.89	0.86	0.84	0.82	0.73
AnyNet	walker4	5.98	4.32	8.03	6.71	0.92	0.85	0.84	0.71	0.67	0.48	0.54	0.35	5.86	5.32	8.46	7.96	0.88	0.88	0.79	0.76	0.56	0.55	0.47	0.42	6.06	3.71	7.76	5.81	0.95	0.84	0.87	0.68	0.73	0.44	0.57	0.31
AnyNet	windmills4	3.39	2.65	5.93	5.48	0.86	0.8	0.73	0.57	0.49	0.31	0.28	0.14	4.98	4.72	8.67	8.33	0.9	0.88	0.81	0.76	0.55	0.55	0.4	0.35	2.95	2.07	4.9	4.37	0.84	0.78	0.71	0.52	0.47	0.24	0.25	0.09
AnyNet	youngster_room10	3.84	1.96	7.99	3.34	0.85	0.78	0.69	0.58	0.42	0.25	0.23	0.11	4.23	3.45	7.76	5.19	0.91	0.9	0.8	0.77	0.59	0.53	0.29	0.26	3.65	1.23	8.09	1.88	0.83	0.72	0.64	0.49	0.34	0.12	0.19	0.04
AnyNet	youngster_room14	3.95	2.04	6.28	3.37	0.8	0.76	0.64	0.51	0.45	0.27	0.31	0.15	3.76	2.74	6.38	4.31	0.81	0.8	0.62	0.6	0.42	0.37	0.28	0.21	4.06	1.67	6.23	2.74	0.8	0.74	0.65	0.47	0.46	0.21	0.34	0.11
AnyNet	youngster_room4	2.13	1.55	3.7	2.51	0.78	0.76	0.57	0.54	0.28	0.2	0.12	0.06	2.58	2.15	4.76	3.63	0.77	0.77	0.57	0.58	0.31	0.29	0.17	0.13	1.9	1.25	3.03	1.69	0.78	0.76	0.57	0.53	0.26	0.16	0.1	0.02
AnyNet	youngster_room7	1.85	1.45	2.71	2.11	0.76	0.76	0.55	0.5	0.31	0.2	0.13	0.07	2.39	2.15	3.39	3.01	0.8	0.77	0.63	0.62	0.42	0.39	0.21	0.18	1.57	1.09	2.29	1.46	0.73	0.75	0.51	0.45	0.26	0.11	0.09	0.02
AnyNet	youngster_room9	2.33	1.43	3.62	2.05	0.81	0.76	0.64	0.55	0.35	0.2	0.16	0.05	3.1	2.33	4.57	3.15	0.88	0.86	0.76	0.72	0.49	0.43	0.24	0.15	2.01	1.05	3.12	1.32	0.79	0.72	0.59	0.48	0.3	0.1	0.12	0.01
AnyNet	dining_room_1_13	2.45	1.64	3.59	2.57	0.82	0.77	0.65	0.53	0.41	0.21	0.19	0.08	3.01	2.38	4.35	3.43	0.88	0.86	0.73	0.69	0.5	0.41	0.22	0.14	2.12	1.19	3.04	1.88	0.79	0.72	0.6	0.43	0.36	0.1	0.18	0.04
AnyNet	living_room_3_2	2.08	1.76	3.28	3.54	0.79	0.78	0.62	0.52	0.32	0.2	0.12	0.07	3.59	3.65	5.34	6.44	0.9	0.87	0.78	0.76	0.54	0.53	0.29	0.22	1.65	1.22	2.39	2.06	0.76	0.75	0.58	0.46	0.26	0.11	0.08	0.02
AnyNet	office_top4	3.55	2.64	7.32	4.86	0.8	0.76	0.64	0.58	0.39	0.29	0.19	0.16	3.6	3.03	7.75	5.75	0.75	0.72	0.58	0.55	0.32	0.3	0.19	0.19	3.52	2.46	7.12	4.4	0.82	0.77	0.67	0.59	0.42	0.28	0.19	0.14
AnyNet	sleeping_room_1_13	3.95	2.27	8.01	3.84	0.84	0.81	0.68	0.62	0.41	0.28	0.24	0.14	3.61	3.11	6.33	5	0.82	0.84	0.68	0.65	0.45	0.44	0.28	0.24	4.06	1.98	8.52	3.35	0.84	0.8	0.69	0.6	0.4	0.23	0.22	0.11
AnyNet	dining_room_1_5	2.71	2.62	3.88	3.96	0.9	0.88	0.77	0.73	0.46	0.42	0.19	0.17	3.16	3.07	4.76	4.73	0.86	0.86	0.69	0.7	0.48	0.46	0.25	0.23	2.28	2.19	2.78	3.02	0.95	0.9	0.84	0.76	0.45	0.38	0.13	0.11
AnyNet	dining_room_1_7	8.13	5.93	12.16	10.25	0.94	0.89	0.87	0.76	0.71	0.5	0.5	0.31	7.87	7.15	12.17	11.6	0.92	0.91	0.84	0.79	0.66	0.58	0.46	0.37	8.43	4.52	12.14	8.41	0.96	0.87	0.9	0.73	0.78	0.4	0.54	0.23
AnyNet	dining_room_1_9	2.3	2	3.36	3.13	0.83	0.8	0.68	0.6	0.42	0.32	0.14	0.11	2.56	2.39	3.95	3.8	0.84	0.81	0.67	0.61	0.39	0.37	0.2	0.17	2	1.56	2.55	2.16	0.82	0.78	0.69	0.58	0.47	0.27	0.08	0.05
AnyNet	floating_cubes1	4.27	3.28	5.48	4.63	0.87	0.83	0.78	0.7	0.65	0.52	0.5	0.32	4.49	4.05	5.95	5.59	0.88	0.87	0.78	0.74	0.64	0.59	0.5	0.43	4.09	2.69	5.09	3.73	0.86	0.8	0.78	0.67	0.66	0.46	0.5	0.25
AnyNet	fruit1	4.2	2.97	8.75	5.99	0.84	0.82	0.69	0.65	0.45	0.35	0.26	0.15	4.75	4.03	10.23	8.1	0.84	0.83	0.7	0.67	0.43	0.43	0.26	0.2	3.91	2.39	7.84	4.45	0.83	0.81	0.69	0.63	0.46	0.3	0.25	0.13
AnyNet	fruit6	2.4	1.82	3.81	2.97	0.8	0.76	0.59	0.55	0.33	0.23	0.2	0.11	3.85	3.25	5.54	4.61	0.87	0.86	0.74	0.72	0.54	0.52	0.37	0.28	1.81	1.24	2.82	1.94	0.77	0.71	0.53	0.48	0.24	0.11	0.13	0.04
AnyNet	fruit8	2.41	1.47	4.79	2.26	0.76	0.75	0.56	0.54	0.31	0.18	0.14	0.05	3.25	2.18	5.93	3.31	0.85	0.8	0.71	0.66	0.46	0.4	0.19	0.12	2.02	1.14	4.16	1.54	0.72	0.73	0.49	0.49	0.24	0.08	0.11	0.02
AnyNet	hacienda1	2.74	2.34	3.96	3.58	0.87	0.82	0.73	0.66	0.49	0.41	0.22	0.15	2.88	2.63	4.37	4.07	0.88	0.88	0.75	0.73	0.47	0.44	0.2	0.16	2.6	2.02	3.45	2.94	0.86	0.76	0.72	0.59	0.5	0.37	0.23	0.14
AnyNet	hacienda4	2.98	2.27	5.41	4.17	0.84	0.81	0.68	0.61	0.43	0.32	0.15	0.1	2.48	2.15	5.56	4.53	0.79	0.77	0.57	0.54	0.28	0.24	0.09	0.08	3.55	2.41	5.23	3.71	0.91	0.85	0.8	0.69	0.6	0.4	0.23	0.13
AnyNet	hacienda8	14.84	18.23	26.58	30.5	0.81	0.83	0.68	0.7	0.51	0.56	0.41	0.47	8.05	9.07	18.37	20.29	0.75	0.75	0.59	0.59	0.38	0.43	0.24	0.27	17.37	21.65	29.06	33.53	0.84	0.86	0.71	0.74	0.55	0.61	0.47	0.54
AnyNet	landscape1_5	4.82	3.63	9.95	7.23	0.8	0.79	0.64	0.64	0.4	0.35	0.25	0.2	6.45	5.55	12.14	9.78	0.85	0.86	0.74	0.74	0.54	0.52	0.34	0.33	3.76	2.39	8.21	4.9	0.77	0.75	0.58	0.58	0.3	0.24	0.19	0.12
AnyNet	landscape1_6	2.15	1.88	3.55	3.08	0.78	0.79	0.58	0.58	0.29	0.25	0.14	0.11	3.17	2.77	4.8	4.24	0.85	0.84	0.71	0.68	0.46	0.43	0.26	0.21	1.31	1.15	1.99	1.58	0.72	0.75	0.47	0.5	0.15	0.1	0.05	0.02
AnyNet	landscape3_2	4.39	4.44	8.44	8.65	0.83	0.84	0.62	0.63	0.39	0.4	0.3	0.31	5.32	5.41	10.71	10.98	0.82	0.82	0.65	0.65	0.42	0.43	0.3	0.29	3.72	3.75	6.33	6.48	0.85	0.85	0.61	0.62	0.37	0.39	0.31	0.32
AnyNet	landscape5_2	26.07	9.78	45.91	19.51	0.91	0.81	0.79	0.64	0.6	0.44	0.49	0.33	16.37	9.87	34.61	20.47	0.91	0.87	0.76	0.7	0.57	0.46	0.4	0.31	28.08	9.76	47.91	19.31	0.91	0.79	0.8	0.63	0.61	0.44	0.51	0.33
AnyNet	living_room_1_1	2.43	1.58	4.69	2.56	0.77	0.74	0.59	0.52	0.33	0.23	0.15	0.07	2.67	2.03	5.12	3.18	0.82	0.8	0.66	0.61	0.38	0.34	0.18	0.11	2.17	1.07	4.14	1.59	0.73	0.67	0.51	0.4	0.27	0.11	0.12	0.03
AnyNet	living_room_2_3	2.37	1.63	3.91	2.84	0.81	0.75	0.59	0.52	0.34	0.23	0.17	0.06	4.48	3.22	6.82	5.32	0.9	0.81	0.71	0.63	0.49	0.42	0.37	0.23	1.85	1.24	2.76	1.76	0.79	0.73	0.56	0.49	0.31	0.18	0.12	0.02
AnyNetLvl1	abstract_bowls_1	3.31	3.29	4.55	4.49	0.89	0.9	0.78	0.8	0.58	0.59	0.28	0.27	3.99	3.96	5.32	5.28	0.91	0.91	0.83	0.84	0.67	0.67	0.37	0.37	2.72	2.72	3.75	3.68	0.88	0.9	0.74	0.77	0.51	0.52	0.2	0.19
AnyNetLvl1	abstract_bowls_14	2.99	2.21	4.19	3.08	0.88	0.87	0.75	0.71	0.53	0.41	0.24	0.12	2.88	2.75	4.13	3.84	0.88	0.88	0.74	0.75	0.53	0.51	0.2	0.19	3.06	1.89	4.22	2.5	0.88	0.87	0.75	0.69	0.53	0.35	0.27	0.07
AnyNetLvl1	bones_3	6.63	5.24	10.97	8.92	0.91	0.88	0.81	0.76	0.62	0.54	0.37	0.34	6.93	6.2	11.33	10.25	0.9	0.88	0.8	0.76	0.62	0.57	0.39	0.38	5.96	3.14	10.15	4.9	0.92	0.88	0.83	0.75	0.62	0.47	0.32	0.23
AnyNetLvl1	bones_6	7.58	9.92	12.23	16.16	0.92	0.91	0.84	0.81	0.69	0.64	0.45	0.45	8.14	10.82	13.09	17.16	0.92	0.91	0.83	0.82	0.68	0.65	0.46	0.48	5.45	6.57	8.22	11.69	0.94	0.89	0.88	0.78	0.72	0.58	0.43	0.34
AnyNetLvl1	Chairs4	4.38	4.36	5.49	5.71	0.94	0.88	0.87	0.77	0.71	0.63	0.44	0.46	4.77	4.83	5.85	6.1	0.96	0.91	0.89	0.81	0.76	0.69	0.5	0.53	3.13	2.89	4.19	4.3	0.89	0.82	0.78	0.64	0.58	0.44	0.25	0.23
AnyNetLvl1	chess_8	2.86	2.34	4.01	3.17	0.86	0.84	0.71	0.68	0.47	0.42	0.25	0.19	3.29	2.98	4.46	3.88	0.87	0.86	0.76	0.74	0.56	0.55	0.32	0.3	2.44	1.72	3.53	2.28	0.85	0.83	0.66	0.62	0.4	0.3	0.18	0.08
AnyNetLvl1	childroom_1	1.62	1.56	2.19	2.18	0.77	0.77	0.6	0.54	0.29	0.26	0.07	0.07	2.08	2.14	2.77	2.87	0.82	0.84	0.67	0.65	0.39	0.4	0.14	0.15	1.3	1.15	1.65	1.5	0.74	0.71	0.55	0.46	0.21	0.16	0.02	0.01
AnyNetLvl1	childroom_12	4.66	2.75	7.23	4.74	0.88	0.81	0.77	0.64	0.59	0.37	0.37	0.18	6.23	3.69	9.11	6.05	0.9	0.85	0.8	0.71	0.66	0.46	0.51	0.27	3.11	1.82	4.67	2.89	0.86	0.77	0.75	0.57	0.51	0.27	0.22	0.09
AnyNetLvl1	childroom_2	4.87	4.19	9.3	8.95	0.89	0.87	0.79	0.74	0.6	0.48	0.31	0.23	6.06	6.26	11.67	11.95	0.9	0.92	0.8	0.83	0.64	0.65	0.37	0.38	3.78	2.27	6.38	4.71	0.88	0.82	0.77	0.65	0.56	0.33	0.26	0.09
AnyNetLvl1	childroom_4	1.68	1.53	2.56	2.27	0.75	0.74	0.54	0.52	0.28	0.25	0.07	0.07	2	1.82	3.07	2.72	0.79	0.78	0.61	0.59	0.34	0.3	0.1	0.1	1.34	1.24	1.89	1.7	0.71	0.7	0.47	0.44	0.22	0.2	0.04	0.03
AnyNetLvl1	childroom_6	1.57	1.55	2.28	2.26	0.77	0.75	0.55	0.54	0.24	0.26	0.07	0.07	2.02	1.96	2.86	2.81	0.84	0.81	0.66	0.63	0.34	0.34	0.12	0.11	1.17	1.19	1.62	1.64	0.7	0.69	0.46	0.47	0.15	0.19	0.02	0.02
AnyNetLvl1	childroom_9	3.77	2.54	5.23	3.77	0.91	0.82	0.81	0.66	0.61	0.41	0.33	0.2	4.24	3.58	6.18	4.97	0.9	0.9	0.79	0.79	0.57	0.57	0.34	0.32	3.49	1.94	4.6	2.88	0.92	0.77	0.82	0.58	0.64	0.32	0.32	0.13
AnyNetLvl1	cloth4	5.21	3.21	10.62	5.56	0.87	0.85	0.72	0.71	0.47	0.45	0.29	0.22	6.42	4.95	12.78	8.58	0.89	0.9	0.75	0.76	0.52	0.51	0.32	0.3	4.89	2.75	9.96	4.43	0.86	0.84	0.71	0.69	0.46	0.44	0.28	0.19
AnyNetLvl1	cloth6	3.21	2.26	5.48	3.42	0.9	0.87	0.78	0.7	0.47	0.38	0.21	0.12	4.11	3.14	7.13	4.7	0.93	0.91	0.82	0.8	0.52	0.51	0.26	0.22	2.77	1.83	4.47	2.59	0.88	0.85	0.75	0.65	0.45	0.31	0.18	0.08
AnyNetLvl1	cloth7	9.72	3.28	16.76	5.25	0.88	0.8	0.78	0.64	0.62	0.4	0.5	0.25	5.94	3.43	11.58	5.69	0.86	0.79	0.72	0.62	0.47	0.38	0.29	0.24	12.91	3.14	20.13	4.85	0.9	0.81	0.84	0.66	0.75	0.42	0.68	0.26
AnyNetLvl1	coral6	3.05	2.47	4.68	3.54	0.84	0.85	0.68	0.69	0.46	0.43	0.23	0.17	4.33	3.63	6.17	4.83	0.89	0.9	0.8	0.8	0.6	0.6	0.37	0.35	2.25	1.75	3.46	2.41	0.8	0.82	0.6	0.62	0.37	0.32	0.15	0.07
AnyNetLvl1	dining_room_1_1	9.18	8.52	14.32	13.63	0.93	0.92	0.87	0.84	0.74	0.7	0.54	0.48	9.74	9.73	15.36	15.36	0.93	0.92	0.86	0.84	0.73	0.71	0.51	0.5	8.39	6.78	12.68	10.7	0.94	0.93	0.89	0.83	0.76	0.68	0.58	0.46
AnyNetLvl1	office_top5	2.47	2.35	3.32	3.15	0.86	0.85	0.73	0.71	0.47	0.46	0.18	0.16	2.86	3.07	4.03	4.11	0.85	0.88	0.71	0.76	0.47	0.54	0.24	0.27	2.26	1.97	2.86	2.49	0.86	0.84	0.74	0.68	0.48	0.42	0.15	0.1
AnyNetLvl1	park1	2.19	1.96	3.39	2.84	0.82	0.82	0.67	0.65	0.39	0.37	0.11	0.08	2.3	2.18	3.77	3.25	0.86	0.85	0.7	0.69	0.36	0.39	0.1	0.09	2.08	1.74	2.92	2.31	0.79	0.8	0.63	0.61	0.42	0.34	0.13	0.07
AnyNetLvl1	park10	2.86	2.81	4.19	4.12	0.87	0.87	0.75	0.74	0.49	0.48	0.21	0.21	3.33	3.36	4.85	4.82	0.88	0.89	0.76	0.78	0.54	0.55	0.27	0.27	2	1.79	2.57	2.34	0.85	0.83	0.73	0.66	0.39	0.34	0.09	0.08
AnyNetLvl1	park6	5.29	4.57	8.94	8.45	0.9	0.89	0.79	0.78	0.61	0.55	0.36	0.28	8.99	8.7	13.84	13.82	0.93	0.93	0.85	0.84	0.7	0.68	0.53	0.49	3.41	2.48	4.81	3.28	0.88	0.87	0.76	0.74	0.56	0.49	0.28	0.17
AnyNetLvl1	person1_1	16.11	5.67	23.46	9.73	0.89	0.84	0.8	0.68	0.71	0.46	0.61	0.33	12.21	9.24	17.2	13.59	0.9	0.91	0.8	0.8	0.68	0.63	0.57	0.5	17.34	4.54	25.12	8.13	0.89	0.81	0.81	0.64	0.72	0.4	0.62	0.27
AnyNetLvl1	person1_3	5.39	4.61	10.66	9.81	0.91	0.9	0.81	0.81	0.62	0.57	0.33	0.27	8.72	7.97	15.17	14.86	0.94	0.95	0.88	0.9	0.75	0.74	0.53	0.49	3.61	2.82	7.18	5.45	0.89	0.88	0.78	0.77	0.56	0.48	0.23	0.14
AnyNetLvl1	person1_8	8.28	3.67	14.64	5.73	0.83	0.82	0.71	0.68	0.56	0.46	0.42	0.29	8.66	5.8	14.42	8.21	0.85	0.87	0.74	0.77	0.62	0.59	0.49	0.46	8.18	3.15	14.7	4.94	0.83	0.81	0.7	0.65	0.55	0.42	0.4	0.25
AnyNetLvl1	person2_5	3.07	1.74	5.72	2.61	0.84	0.78	0.7	0.57	0.45	0.29	0.2	0.08	3.28	2.4	6.49	3.49	0.85	0.85	0.72	0.69	0.48	0.45	0.18	0.16	2.95	1.36	5.24	1.96	0.83	0.75	0.68	0.5	0.44	0.2	0.2	0.04
AnyNetLvl1	person3_10	3.23	2.45	5.25	3.53	0.87	0.86	0.74	0.71	0.49	0.41	0.24	0.17	4.47	3.94	6.56	5.38	0.89	0.89	0.78	0.79	0.61	0.6	0.41	0.37	2.78	1.91	4.68	2.54	0.86	0.85	0.73	0.68	0.45	0.35	0.17	0.1
AnyNetLvl1	person3_3	3.81	2.54	5.55	3.98	0.87	0.79	0.75	0.63	0.53	0.39	0.32	0.19	4.71	4.38	6.77	6.24	0.87	0.87	0.76	0.76	0.59	0.58	0.4	0.41	3.51	1.93	5.07	2.83	0.88	0.77	0.74	0.58	0.51	0.33	0.29	0.12
AnyNetLvl1	person3_4	4.35	3.69	7.72	6.26	0.86	0.84	0.73	0.7	0.49	0.47	0.26	0.25	6.05	5.77	9.78	8.6	0.88	0.9	0.76	0.81	0.58	0.64	0.39	0.42	3.39	2.51	6.26	4.41	0.84	0.8	0.71	0.64	0.44	0.38	0.2	0.15
AnyNetLvl1	plant_vintage12	4.29	3.22	6.11	4.52	0.89	0.89	0.79	0.77	0.59	0.55	0.36	0.26	4.35	3.78	6.27	5.24	0.88	0.89	0.77	0.78	0.6	0.6	0.35	0.33	4.2	2.23	5.83	2.82	0.91	0.89	0.82	0.77	0.58	0.46	0.36	0.13
AnyNetLvl1	plant_vintage14	3.19	1.58	5.87	2.34	0.8	0.76	0.6	0.53	0.36	0.24	0.21	0.07	3.4	2.11	6.75	3.26	0.83	0.79	0.62	0.59	0.31	0.32	0.18	0.14	3.1	1.36	5.47	1.83	0.78	0.75	0.59	0.51	0.38	0.21	0.22	0.05
AnyNetLvl1	plant_vintage15	3.53	1.5	7.56	2.22	0.73	0.76	0.55	0.55	0.32	0.23	0.19	0.05	3.7	1.98	8.16	3.13	0.77	0.76	0.6	0.57	0.31	0.31	0.16	0.1	3.46	1.29	7.28	1.67	0.71	0.75	0.52	0.53	0.32	0.2	0.2	0.02
AnyNetLvl1	plant_vintage2	3.48	2.83	6.87	4.93	0.85	0.86	0.73	0.72	0.48	0.43	0.21	0.17	3.43	3.1	7.18	5.9	0.83	0.83	0.68	0.67	0.42	0.38	0.19	0.16	3.51	2.67	6.68	4.27	0.86	0.88	0.76	0.75	0.51	0.47	0.23	0.17
AnyNetLvl1	plant_vintage4	4.13	2.33	8.08	3.82	0.81	0.82	0.65	0.65	0.43	0.36	0.24	0.14	4.15	2.66	8.52	4.43	0.83	0.81	0.68	0.65	0.44	0.39	0.22	0.19	4.12	2.13	7.8	3.4	0.8	0.83	0.63	0.66	0.42	0.35	0.26	0.11
AnyNetLvl1	plant_vintage7	3.91	2.76	5.58	4.11	0.89	0.83	0.78	0.69	0.6	0.45	0.35	0.21	4.13	3.66	5.65	5.12	0.91	0.87	0.82	0.77	0.66	0.59	0.37	0.33	3.66	1.68	5.51	2.4	0.87	0.79	0.74	0.59	0.54	0.28	0.32	0.08
AnyNetLvl1	roundntwist4	4.43	6.55	6.69	10.93	0.92	0.93	0.87	0.89	0.72	0.79	0.37	0.44	3.46	4.86	5.94	9.34	0.87	0.89	0.78	0.82	0.58	0.67	0.24	0.3	5.89	9.09	7.69	12.96	1	1	1	1	0.94	0.98	0.56	0.65
AnyNetLvl1	ScifiKnot1	2.4	2.53	3.68	3.48	0.77	0.86	0.59	0.71	0.37	0.44	0.19	0.2	3.14	3.23	4.62	4.44	0.82	0.86	0.67	0.73	0.46	0.51	0.28	0.29	1.95	2.1	2.96	2.74	0.73	0.86	0.55	0.7	0.32	0.39	0.14	0.14
AnyNetLvl1	ScifiKnot4	5.04	3.2	7.94	5.93	0.86	0.82	0.75	0.65	0.58	0.4	0.37	0.17	6.45	5.41	9.69	8.41	0.9	0.92	0.8	0.82	0.66	0.62	0.45	0.38	4.55	2.44	7.24	4.8	0.85	0.78	0.73	0.59	0.55	0.32	0.35	0.1
AnyNetLvl1	sleeping_room_1_11	2.08	2.08	2.91	2.77	0.84	0.83	0.66	0.69	0.37	0.41	0.14	0.13	3.48	3.34	4.43	4.12	0.93	0.92	0.85	0.85	0.64	0.66	0.35	0.34	1.57	1.62	2.09	2.07	0.81	0.8	0.6	0.63	0.27	0.32	0.06	0.05
AnyNetLvl1	living_room_3_5	2.81	2.44	3.92	3.45	0.87	0.84	0.74	0.69	0.49	0.43	0.22	0.18	3.56	3.36	4.78	4.45	0.9	0.9	0.8	0.8	0.61	0.59	0.32	0.31	2.14	1.63	2.97	2.2	0.85	0.78	0.68	0.6	0.39	0.29	0.13	0.07
AnyNetLvl1	living_room_3_9	2.48	2.09	3.95	2.95	0.86	0.81	0.72	0.66	0.43	0.44	0.12	0.09	3.04	2.71	5.15	3.91	0.87	0.87	0.76	0.74	0.45	0.52	0.15	0.15	2.2	1.78	3.18	2.33	0.85	0.79	0.7	0.63	0.42	0.4	0.11	0.07
AnyNetLvl1	mannequins_10	10.16	11.17	17.89	19.5	0.91	0.88	0.82	0.8	0.64	0.64	0.48	0.45	12.81	14.65	21.07	23.2	0.92	0.92	0.84	0.85	0.7	0.73	0.55	0.58	5.54	5.1	10.19	10.23	0.9	0.82	0.78	0.7	0.53	0.46	0.34	0.23
AnyNetLvl1	mannequins_12	7.26	4.7	10.47	7.92	0.91	0.86	0.82	0.75	0.68	0.55	0.52	0.33	7.32	6.17	10.92	9.45	0.92	0.92	0.84	0.84	0.66	0.68	0.46	0.44	7.2	3.26	10.01	6.05	0.89	0.8	0.81	0.66	0.7	0.42	0.58	0.22
AnyNetLvl1	mannequins_2	4.97	3.65	7.2	5.68	0.9	0.88	0.81	0.77	0.65	0.57	0.42	0.28	4.68	4.19	7.13	6.53	0.89	0.89	0.79	0.79	0.61	0.59	0.37	0.33	5.55	2.61	7.35	3.47	0.93	0.86	0.85	0.73	0.75	0.52	0.52	0.2
AnyNetLvl1	mannequins_5	2.54	2.34	3.5	3.28	0.86	0.81	0.7	0.66	0.43	0.41	0.22	0.19	2.88	2.73	3.93	3.75	0.87	0.83	0.72	0.69	0.48	0.46	0.27	0.26	2.04	1.78	2.76	2.44	0.85	0.78	0.67	0.61	0.36	0.33	0.14	0.1
AnyNetLvl1	mannequins_9	4.62	3.71	6.63	5.46	0.9	0.91	0.81	0.81	0.63	0.59	0.4	0.29	4.51	4.07	6.69	6.05	0.9	0.9	0.79	0.8	0.61	0.6	0.37	0.33	4.85	2.89	6.49	3.84	0.92	0.93	0.84	0.84	0.66	0.58	0.46	0.21
AnyNetLvl1	Minicubes4	4.98	4.94	7.26	7.15	0.89	0.92	0.78	0.82	0.6	0.62	0.39	0.37	4.88	4.91	7.17	7.09	0.9	0.91	0.8	0.82	0.61	0.63	0.37	0.38	5.17	4.99	7.43	7.27	0.88	0.94	0.75	0.84	0.57	0.58	0.43	0.36
AnyNetLvl1	Minicubes5	4.49	4.5	5.84	6.03	0.91	0.91	0.84	0.83	0.69	0.67	0.43	0.42	4.06	4.02	5.45	5.54	0.9	0.9	0.81	0.8	0.64	0.62	0.37	0.37	5.11	5.19	6.35	6.66	0.93	0.92	0.88	0.87	0.76	0.75	0.5	0.49
AnyNetLvl1	Minicubes9	3.59	2.86	4.65	3.78	0.93	0.88	0.85	0.77	0.66	0.54	0.33	0.24	3.93	3.4	5.15	4.37	0.94	0.89	0.84	0.8	0.67	0.63	0.37	0.32	3.17	2.18	3.91	2.86	0.93	0.86	0.85	0.72	0.64	0.43	0.29	0.13
AnyNetLvl1	moto3	2.82	3.35	4.19	5.67	0.88	0.87	0.78	0.76	0.47	0.51	0.21	0.22	3.22	3.41	4.87	6.08	0.91	0.89	0.81	0.78	0.57	0.55	0.23	0.21	2.5	3.3	3.56	5.32	0.86	0.86	0.74	0.75	0.4	0.47	0.19	0.23
AnyNetLvl1	music1_1	7.8	2.98	16.94	5.02	0.86	0.84	0.7	0.67	0.5	0.39	0.31	0.19	7.82	4.1	16.85	6.45	0.88	0.88	0.75	0.76	0.54	0.56	0.31	0.29	7.79	2.41	16.99	4.11	0.86	0.83	0.68	0.62	0.48	0.3	0.31	0.15
AnyNetLvl1	music1_6	4.81	4.3	6.92	6.73	0.9	0.89	0.8	0.78	0.63	0.59	0.42	0.33	5.58	5.48	7.94	8.21	0.91	0.92	0.83	0.83	0.68	0.67	0.48	0.43	3.67	2.55	5.07	3.59	0.88	0.85	0.76	0.71	0.56	0.46	0.35	0.18
AnyNetLvl1	music1_7	2.1	1.7	3.68	2.24	0.83	0.82	0.66	0.62	0.32	0.31	0.12	0.08	2.88	2.32	5.11	3.04	0.85	0.85	0.72	0.68	0.46	0.45	0.21	0.2	1.77	1.44	2.86	1.8	0.81	0.8	0.63	0.6	0.26	0.25	0.08	0.03
AnyNetLvl1	music1_9	6.46	3.02	10.92	5.11	0.88	0.85	0.77	0.7	0.58	0.43	0.39	0.21	5.49	4.78	8.94	7.34	0.9	0.91	0.79	0.83	0.59	0.62	0.41	0.41	6.73	2.53	11.42	4.28	0.88	0.84	0.76	0.66	0.58	0.38	0.39	0.15
AnyNetLvl1	nest5	6.68	5.99	21.58	21.37	0.92	0.89	0.84	0.79	0.68	0.6	0.43	0.38	8.14	7.74	27.19	27.07	0.92	0.92	0.85	0.85	0.7	0.69	0.5	0.49	4.94	3.9	11.78	11.3	0.92	0.86	0.83	0.73	0.66	0.49	0.35	0.26
AnyNetLvl1	office1	2.72	1.91	5.16	2.92	0.8	0.82	0.62	0.63	0.34	0.31	0.16	0.08	2.6	2.53	4.56	3.97	0.84	0.86	0.65	0.69	0.35	0.41	0.15	0.13	2.79	1.56	5.46	2.12	0.78	0.8	0.6	0.6	0.34	0.26	0.16	0.05
AnyNetLvl1	office12	4.84	3.51	7.18	5.63	0.89	0.85	0.79	0.69	0.61	0.45	0.42	0.26	6.5	5.37	8.9	7.62	0.94	0.89	0.87	0.78	0.73	0.62	0.58	0.45	3.97	2.53	6.09	4.21	0.87	0.82	0.75	0.64	0.55	0.35	0.33	0.16
AnyNetLvl1	office14	5.82	3.53	9.64	6.51	0.89	0.88	0.8	0.73	0.62	0.45	0.38	0.23	6.32	5.25	10.27	9.12	0.92	0.91	0.84	0.82	0.67	0.61	0.43	0.36	5.47	2.31	9.17	3.66	0.87	0.86	0.76	0.66	0.59	0.34	0.35	0.13
AnyNetLvl1	office2	3.98	2.93	7.42	5.51	0.82	0.86	0.68	0.72	0.48	0.47	0.23	0.14	3.94	3.81	8.44	7.98	0.76	0.81	0.56	0.63	0.32	0.39	0.17	0.2	3.99	2.62	7.01	4.27	0.84	0.88	0.72	0.75	0.53	0.5	0.25	0.11
AnyNetLvl1	sleeping_room_1_15	3.5	1.71	7.56	2.18	0.83	0.83	0.68	0.64	0.42	0.33	0.16	0.07	3.44	2.08	7.74	2.62	0.88	0.85	0.74	0.7	0.44	0.43	0.14	0.12	3.54	1.43	7.41	1.75	0.8	0.82	0.64	0.59	0.4	0.25	0.18	0.02
AnyNetLvl1	sleeping_room_1_3	3.74	3.46	10	9.07	0.76	0.78	0.59	0.6	0.38	0.36	0.15	0.14	4.77	4.39	11.37	10.31	0.82	0.81	0.66	0.66	0.44	0.42	0.22	0.19	3.39	3.15	9.51	8.62	0.74	0.77	0.56	0.57	0.36	0.33	0.13	0.13
AnyNetLvl1	sleeping_room_1_7	3.07	2.76	6.05	4.59	0.83	0.87	0.65	0.7	0.39	0.41	0.17	0.18	3.99	3.77	8.02	6.6	0.82	0.84	0.66	0.7	0.4	0.42	0.22	0.25	2.66	2.31	4.91	3.31	0.83	0.89	0.65	0.71	0.38	0.4	0.14	0.15
AnyNetLvl1	spaceStation2	7.55	6.33	10.6	9.18	0.94	0.94	0.88	0.89	0.79	0.77	0.69	0.62	5.6	5.61	8.69	8.67	0.87	0.89	0.74	0.77	0.6	0.58	0.41	0.41	8.54	6.7	11.45	9.43	0.97	0.97	0.94	0.94	0.89	0.87	0.83	0.72
AnyNetLvl1	stack_circles4	13.52	4.83	19.73	7.2	0.92	0.9	0.83	0.8	0.71	0.6	0.59	0.34	9.36	5.66	15.75	8.29	0.9	0.91	0.79	0.82	0.63	0.64	0.45	0.39	15.83	4.37	21.64	6.52	0.92	0.9	0.86	0.79	0.76	0.57	0.67	0.32
AnyNetLvl1	stack_circles9	12.55	4.49	22.78	6.52	0.94	0.91	0.88	0.81	0.76	0.6	0.62	0.36	7.94	5.5	15.48	7.97	0.92	0.91	0.83	0.81	0.65	0.6	0.45	0.41	15.45	3.85	26.37	5.41	0.96	0.91	0.91	0.81	0.83	0.6	0.73	0.33
AnyNetLvl1	time_travellers_10	23.45	17.12	34.2	27.74	0.88	0.86	0.81	0.75	0.69	0.61	0.54	0.48	22.76	20.55	34.16	32.23	0.91	0.91	0.83	0.82	0.69	0.66	0.52	0.5	23.73	15.71	34.22	25.69	0.87	0.84	0.8	0.72	0.68	0.58	0.55	0.47
AnyNetLvl1	time_travellers_13	10.52	4.63	13.56	6.69	0.93	0.92	0.87	0.83	0.78	0.64	0.65	0.35	8.92	6.11	12.89	8.42	0.89	0.94	0.8	0.86	0.67	0.71	0.5	0.47	11.62	3.62	14	5.18	0.95	0.9	0.91	0.8	0.86	0.59	0.75	0.28
AnyNetLvl1	time_travellers_15	15.46	8.27	20.65	12.93	0.94	0.95	0.88	0.9	0.77	0.74	0.65	0.5	13.08	10.94	18.75	16.23	0.94	0.93	0.88	0.86	0.75	0.72	0.56	0.54	16.83	6.74	21.67	10.57	0.94	0.96	0.88	0.92	0.79	0.74	0.7	0.47
AnyNetLvl1	time_travellers_2	9.43	6.15	12.16	9	0.94	0.9	0.89	0.8	0.77	0.65	0.62	0.44	8.11	6.99	11.17	9.55	0.92	0.94	0.85	0.86	0.72	0.74	0.53	0.53	10.39	5.55	12.83	8.59	0.96	0.87	0.91	0.75	0.81	0.59	0.68	0.38
AnyNetLvl1	time_travellers_20	7.36	2.42	9.87	3.45	0.95	0.8	0.9	0.63	0.81	0.43	0.64	0.2	7.01	3.62	10.77	4.76	0.91	0.9	0.83	0.78	0.68	0.59	0.5	0.35	7.53	1.81	9.38	2.52	0.97	0.76	0.94	0.56	0.87	0.34	0.72	0.12
AnyNetLvl1	time_travellers_24	27.82	9.8	38.77	20.84	0.95	0.89	0.91	0.75	0.8	0.51	0.69	0.29	24.53	18.11	37.39	31.26	0.93	0.9	0.87	0.8	0.72	0.65	0.58	0.48	28.94	6.98	39.23	15.81	0.96	0.88	0.92	0.73	0.83	0.47	0.73	0.23
AnyNetLvl1	time_travellers_25	12.15	7.15	17.52	11.93	0.93	0.94	0.85	0.88	0.7	0.71	0.55	0.45	12.37	10.25	18.91	15.84	0.91	0.94	0.83	0.89	0.7	0.77	0.54	0.57	12	5.09	16.54	8.38	0.94	0.94	0.86	0.87	0.7	0.67	0.57	0.36
AnyNetLvl1	time_travellers_3	16.12	7.85	21.34	12.68	0.95	0.92	0.89	0.84	0.78	0.7	0.69	0.46	12.31	9.01	18.09	14.24	0.93	0.93	0.85	0.85	0.71	0.72	0.58	0.52	18.97	6.99	23.48	11.38	0.96	0.92	0.92	0.83	0.83	0.68	0.78	0.41
AnyNetLvl1	twirls2	2.86	2.95	4.2	4.34	0.85	0.87	0.72	0.73	0.5	0.5	0.22	0.22	3.56	3.7	5.12	5.39	0.91	0.9	0.81	0.8	0.61	0.61	0.27	0.27	2.4	2.46	3.48	3.49	0.81	0.85	0.67	0.68	0.43	0.42	0.19	0.19
AnyNetLvl1	twirls3	3.23	2.71	5.7	4.5	0.86	0.85	0.74	0.71	0.5	0.46	0.21	0.17	3.79	3.53	6.68	6.03	0.86	0.85	0.75	0.73	0.56	0.54	0.27	0.26	2.95	2.3	5.13	3.5	0.87	0.84	0.73	0.7	0.48	0.42	0.18	0.12
AnyNetLvl1	voronoid_sphere6	7.11	6.9	10.98	10.98	0.91	0.92	0.83	0.83	0.67	0.64	0.44	0.4	7.98	8.5	11.87	12.76	0.92	0.92	0.84	0.83	0.69	0.66	0.49	0.48	5.66	4.21	9.29	7.06	0.9	0.91	0.81	0.83	0.63	0.6	0.37	0.25
AnyNetLvl1	voronoid_sphere9	5.6	5.65	7.31	7.59	0.94	0.92	0.88	0.81	0.72	0.65	0.5	0.5	5.35	5.45	7.22	7.58	0.94	0.91	0.86	0.8	0.69	0.61	0.44	0.44	7.05	6.8	7.82	7.69	0.98	0.95	0.96	0.91	0.9	0.87	0.82	0.82
AnyNetLvl1	walker4	6.01	4.88	8.17	7.11	0.91	0.88	0.83	0.79	0.69	0.62	0.53	0.42	6.02	5.62	8.67	8.24	0.89	0.89	0.8	0.8	0.62	0.63	0.48	0.46	6	4.42	7.85	6.31	0.92	0.88	0.85	0.78	0.73	0.62	0.57	0.4
AnyNetLvl1	windmills4	3.7	3.75	6.12	6.08	0.9	0.91	0.81	0.79	0.58	0.6	0.33	0.29	5.31	5.47	9.1	8.87	0.91	0.92	0.82	0.83	0.64	0.65	0.45	0.46	3.26	3.27	4.99	5.04	0.9	0.9	0.8	0.77	0.57	0.59	0.3	0.25
AnyNetLvl1	youngster_room10	4.14	2.41	8.35	3.8	0.86	0.78	0.73	0.62	0.49	0.41	0.25	0.16	4.53	4.08	8.06	5.69	0.9	0.93	0.81	0.84	0.65	0.66	0.34	0.34	3.95	1.61	8.49	2.42	0.84	0.71	0.69	0.52	0.41	0.29	0.21	0.08
AnyNetLvl1	youngster_room14	4.33	2.51	6.58	3.71	0.84	0.81	0.7	0.65	0.53	0.42	0.35	0.19	4.11	3.13	6.78	4.59	0.84	0.83	0.68	0.69	0.48	0.48	0.3	0.27	4.46	2.17	6.48	3.13	0.85	0.8	0.72	0.63	0.56	0.38	0.38	0.15
AnyNetLvl1	youngster_room4	2.41	1.99	4.08	3.05	0.82	0.8	0.63	0.6	0.34	0.33	0.15	0.11	2.89	2.53	5.18	4.08	0.86	0.82	0.68	0.65	0.37	0.39	0.17	0.16	2.17	1.72	3.39	2.37	0.8	0.79	0.6	0.58	0.33	0.3	0.14	0.09
AnyNetLvl1	youngster_room7	2.04	1.72	2.89	2.4	0.78	0.75	0.61	0.55	0.36	0.29	0.16	0.12	2.51	2.4	3.37	3.17	0.83	0.83	0.67	0.66	0.48	0.44	0.24	0.23	1.8	1.37	2.62	1.9	0.76	0.71	0.57	0.49	0.31	0.21	0.12	0.06
AnyNetLvl1	youngster_room9	2.57	1.83	3.84	2.49	0.83	0.81	0.69	0.63	0.44	0.35	0.18	0.08	3.3	2.81	4.74	3.6	0.88	0.9	0.78	0.81	0.56	0.57	0.27	0.22	2.26	1.42	3.38	1.82	0.81	0.77	0.65	0.55	0.39	0.26	0.14	0.02
AnyNetLvl1	dining_room_1_13	2.7	2.06	3.89	2.99	0.85	0.82	0.7	0.65	0.46	0.35	0.22	0.12	3.11	2.8	4.57	3.85	0.87	0.87	0.72	0.75	0.51	0.51	0.23	0.22	2.46	1.61	3.41	2.32	0.84	0.79	0.68	0.59	0.43	0.25	0.21	0.06
AnyNetLvl1	living_room_3_2	2.49	2.42	3.69	4.07	0.84	0.84	0.71	0.69	0.47	0.41	0.16	0.14	4.01	4.15	5.74	6.86	0.93	0.9	0.85	0.8	0.68	0.62	0.34	0.3	2.06	1.93	2.84	2.81	0.81	0.82	0.68	0.66	0.41	0.36	0.11	0.09
AnyNetLvl1	office_top4	3.94	3.2	7.72	5.38	0.86	0.83	0.71	0.69	0.49	0.45	0.22	0.21	3.81	3.35	7.94	6.25	0.8	0.77	0.61	0.58	0.39	0.37	0.2	0.21	4	3.13	7.61	4.93	0.89	0.86	0.75	0.74	0.54	0.49	0.23	0.21
AnyNetLvl1	sleeping_room_1_13	4.28	2.86	8.24	4.3	0.86	0.86	0.74	0.71	0.52	0.46	0.27	0.23	3.82	3.4	6.26	5.18	0.87	0.85	0.76	0.72	0.51	0.52	0.28	0.27	4.43	2.68	8.82	3.95	0.86	0.86	0.74	0.71	0.52	0.44	0.26	0.21
AnyNetLvl1	dining_room_1_5	3.08	3.21	4.25	4.51	0.91	0.91	0.82	0.82	0.55	0.58	0.24	0.25	3.54	3.49	5.14	5.18	0.87	0.88	0.75	0.76	0.54	0.56	0.3	0.27	2.64	2.95	3.16	3.75	0.95	0.94	0.89	0.87	0.56	0.6	0.18	0.22
AnyNetLvl1	dining_room_1_7	8.31	6.45	12.17	10.38	0.94	0.92	0.89	0.83	0.75	0.64	0.54	0.4	8.13	7.54	12.17	11.67	0.95	0.94	0.88	0.86	0.72	0.68	0.5	0.44	8.51	5.19	12.18	8.67	0.94	0.91	0.89	0.81	0.77	0.58	0.58	0.35
AnyNetLvl1	dining_room_1_9	2.77	2.74	3.76	3.74	0.88	0.89	0.77	0.76	0.53	0.52	0.22	0.21	2.8	2.77	4.17	4.15	0.85	0.84	0.7	0.69	0.44	0.45	0.23	0.23	2.74	2.7	3.25	3.24	0.92	0.93	0.85	0.85	0.63	0.6	0.2	0.19
AnyNetLvl1	floating_cubes1	4.42	4.04	5.57	5.22	0.91	0.91	0.82	0.81	0.7	0.68	0.51	0.45	4.68	4.56	6.1	6.05	0.92	0.91	0.83	0.81	0.7	0.67	0.51	0.5	4.22	3.65	5.14	4.49	0.9	0.92	0.81	0.81	0.7	0.68	0.52	0.42
AnyNetLvl1	fruit1	4.54	3.77	9.02	6.57	0.89	0.91	0.79	0.8	0.55	0.58	0.27	0.24	4.88	4.49	10.33	8.5	0.86	0.89	0.74	0.76	0.5	0.53	0.25	0.27	4.35	3.38	8.23	5.23	0.91	0.92	0.82	0.82	0.58	0.6	0.28	0.23
AnyNetLvl1	fruit6	2.73	2.53	4.1	3.57	0.84	0.85	0.66	0.7	0.4	0.45	0.23	0.19	4.18	3.86	5.78	5.11	0.9	0.9	0.8	0.8	0.62	0.63	0.39	0.38	2.15	1.99	3.18	2.71	0.82	0.84	0.61	0.66	0.32	0.37	0.16	0.11
AnyNetLvl1	fruit8	2.83	1.86	5.19	2.69	0.85	0.81	0.68	0.64	0.39	0.32	0.17	0.09	3.73	2.71	6.42	3.82	0.88	0.87	0.77	0.74	0.56	0.5	0.26	0.21	2.41	1.47	4.5	1.94	0.83	0.79	0.64	0.6	0.32	0.24	0.13	0.03
AnyNetLvl1	hacienda1	3.09	2.87	4.29	4.07	0.89	0.88	0.79	0.76	0.6	0.57	0.24	0.21	3.23	3.06	4.72	4.5	0.9	0.9	0.79	0.78	0.59	0.59	0.23	0.2	2.94	2.66	3.77	3.53	0.89	0.85	0.79	0.73	0.6	0.55	0.25	0.22
AnyNetLvl1	hacienda4	3.54	3.08	5.84	4.85	0.9	0.87	0.79	0.76	0.58	0.56	0.22	0.2	2.98	2.67	6.03	5.04	0.86	0.83	0.7	0.67	0.44	0.42	0.11	0.11	4.17	3.55	5.63	4.61	0.94	0.92	0.9	0.86	0.75	0.71	0.33	0.29
AnyNetLvl1	hacienda8	15.43	18.89	27.19	31.47	0.88	0.86	0.77	0.76	0.57	0.61	0.44	0.49	8.5	9.58	18.37	20.56	0.82	0.81	0.69	0.67	0.45	0.45	0.29	0.3	18.02	22.37	29.82	34.67	0.9	0.89	0.8	0.8	0.62	0.67	0.5	0.56
AnyNetLvl1	landscape1_5	5.27	4.11	10.3	7.64	0.86	0.84	0.73	0.7	0.52	0.48	0.29	0.26	7.1	6.23	12.8	10.42	0.9	0.91	0.81	0.82	0.65	0.65	0.4	0.41	4.08	2.74	8.28	5.09	0.83	0.8	0.67	0.61	0.44	0.37	0.22	0.17
AnyNetLvl1	landscape1_6	2.82	2.52	4.11	3.63	0.87	0.87	0.73	0.73	0.47	0.45	0.21	0.16	3.87	3.48	5.33	4.79	0.91	0.91	0.82	0.82	0.62	0.6	0.33	0.3	1.95	1.73	2.71	2.25	0.84	0.84	0.65	0.65	0.35	0.33	0.11	0.05
AnyNetLvl1	landscape3_2	4.72	4.8	8.78	8.8	0.86	0.86	0.73	0.73	0.5	0.54	0.33	0.35	5.79	5.88	11.33	11.23	0.86	0.87	0.73	0.76	0.5	0.56	0.33	0.33	3.95	4.02	6.36	6.53	0.86	0.85	0.73	0.71	0.49	0.52	0.33	0.36
AnyNetLvl1	landscape5_2	26.43	10.34	46.24	20	0.96	0.89	0.91	0.78	0.73	0.57	0.5	0.37	16.39	10.5	34.28	21.26	0.94	0.89	0.86	0.79	0.67	0.54	0.4	0.33	28.51	10.31	48.35	19.73	0.97	0.89	0.92	0.78	0.75	0.58	0.53	0.38
AnyNetLvl1	living_room_1_1	2.75	2.02	4.9	2.97	0.87	0.82	0.72	0.65	0.42	0.35	0.17	0.11	2.91	2.45	5.4	3.52	0.87	0.87	0.73	0.73	0.47	0.44	0.19	0.15	2.56	1.54	4.27	2.17	0.86	0.77	0.7	0.55	0.36	0.24	0.16	0.06
AnyNetLvl1	living_room_2_3	2.85	2.42	4.54	3.52	0.85	0.83	0.72	0.66	0.49	0.46	0.18	0.15	4.85	3.81	7.73	5.73	0.87	0.88	0.75	0.74	0.55	0.53	0.33	0.3	2.36	2.07	3.32	2.72	0.85	0.82	0.71	0.65	0.47	0.44	0.15	0.11
AnyNetLvl0	abstract_bowls_1	3.16	3.28	4.36	4.52	0.86	0.88	0.74	0.77	0.56	0.57	0.28	0.29	3.74	3.85	5.01	5.19	0.89	0.9	0.79	0.82	0.63	0.65	0.36	0.36	2.66	2.78	3.7	3.84	0.83	0.87	0.7	0.73	0.5	0.5	0.21	0.23
AnyNetLvl0	abstract_bowls_14	3.3	2.46	4.59	3.43	0.87	0.83	0.73	0.69	0.57	0.48	0.3	0.16	3.38	3.04	4.7	4.13	0.89	0.88	0.74	0.76	0.58	0.57	0.29	0.24	3.26	2.1	4.52	2.92	0.85	0.8	0.72	0.65	0.57	0.42	0.3	0.11
AnyNetLvl0	bones_3	6.88	5.57	10.83	8.96	0.92	0.9	0.83	0.81	0.68	0.61	0.44	0.38	7.21	6.52	11.14	10.21	0.93	0.92	0.85	0.84	0.71	0.66	0.46	0.42	6.17	3.48	10.14	5.28	0.9	0.87	0.8	0.74	0.62	0.49	0.41	0.29
AnyNetLvl0	bones_6	7.73	10.06	11.83	15.78	0.94	0.92	0.88	0.85	0.77	0.71	0.52	0.5	8.25	10.85	12.66	16.67	0.93	0.92	0.87	0.85	0.75	0.72	0.53	0.52	5.76	7.11	8.01	11.9	0.97	0.93	0.94	0.85	0.85	0.67	0.49	0.41
AnyNetLvl0	Chairs4	4.32	4.35	5.36	5.61	0.92	0.87	0.84	0.75	0.71	0.62	0.46	0.48	4.65	4.76	5.65	5.93	0.94	0.9	0.87	0.8	0.74	0.68	0.52	0.54	3.29	3.05	4.35	4.5	0.87	0.79	0.76	0.61	0.61	0.43	0.29	0.28
AnyNetLvl0	chess_8	2.76	2.57	3.79	3.34	0.88	0.87	0.72	0.74	0.46	0.49	0.24	0.22	3.13	3.03	4.1	3.84	0.9	0.9	0.77	0.8	0.55	0.58	0.3	0.29	2.42	2.12	3.47	2.78	0.86	0.85	0.67	0.69	0.38	0.41	0.18	0.16
AnyNetLvl0	childroom_1	1.85	1.76	2.25	2.23	0.89	0.84	0.73	0.67	0.39	0.35	0.06	0.07	2.07	2.22	2.57	2.73	0.89	0.88	0.75	0.76	0.45	0.5	0.1	0.12	1.7	1.45	2	1.8	0.9	0.82	0.72	0.6	0.36	0.24	0.04	0.03
AnyNetLvl0	childroom_12	4.84	3.22	7.22	5.09	0.91	0.86	0.82	0.73	0.65	0.47	0.4	0.24	6.48	4.22	9.13	6.44	0.93	0.87	0.87	0.77	0.76	0.58	0.55	0.34	3.22	2.23	4.6	3.22	0.88	0.84	0.78	0.69	0.54	0.37	0.25	0.15
AnyNetLvl0	childroom_2	5.1	4.32	9.47	9.01	0.9	0.86	0.8	0.73	0.61	0.51	0.35	0.26	6.35	6.44	11.79	12.03	0.92	0.94	0.82	0.85	0.66	0.68	0.42	0.41	3.95	2.35	6.63	4.73	0.89	0.79	0.78	0.62	0.56	0.36	0.28	0.11
AnyNetLvl0	childroom_4	1.45	1.35	2.17	1.92	0.71	0.72	0.49	0.49	0.23	0.22	0.06	0.04	1.64	1.54	2.47	2.22	0.74	0.76	0.53	0.55	0.26	0.25	0.08	0.06	1.27	1.16	1.83	1.56	0.68	0.68	0.45	0.44	0.2	0.18	0.04	0.02
AnyNetLvl0	childroom_6	1.72	1.62	2.34	2.24	0.83	0.83	0.65	0.62	0.3	0.25	0.07	0.05	2.09	2	2.84	2.76	0.86	0.87	0.72	0.7	0.4	0.35	0.11	0.1	1.4	1.28	1.8	1.66	0.79	0.8	0.59	0.55	0.22	0.17	0.02	0.02
AnyNetLvl0	childroom_9	3.83	2.73	5.17	3.78	0.91	0.86	0.81	0.73	0.64	0.5	0.37	0.22	3.84	3.28	5.56	4.56	0.87	0.88	0.76	0.77	0.58	0.56	0.34	0.28	3.83	2.42	4.93	3.25	0.93	0.85	0.84	0.71	0.67	0.46	0.38	0.18
AnyNetLvl0	cloth4	5.35	3.5	10.53	5.59	0.9	0.9	0.78	0.79	0.54	0.55	0.31	0.26	6.01	4.55	12.15	7.88	0.88	0.88	0.74	0.75	0.51	0.5	0.33	0.32	5.17	3.22	10.05	4.8	0.91	0.91	0.79	0.8	0.55	0.56	0.3	0.24
AnyNetLvl0	cloth6	2.97	2.19	5.15	3.21	0.84	0.83	0.68	0.67	0.44	0.38	0.22	0.15	3.51	2.77	6.38	4.07	0.83	0.86	0.68	0.71	0.45	0.47	0.25	0.23	2.72	1.92	4.44	2.7	0.84	0.81	0.68	0.65	0.43	0.34	0.2	0.11
AnyNetLvl0	cloth7	9.8	3.49	16.65	5.29	0.9	0.83	0.81	0.69	0.68	0.47	0.53	0.28	5.88	3.58	11.14	5.53	0.86	0.86	0.74	0.72	0.54	0.47	0.33	0.25	13.12	3.41	20.16	5.07	0.93	0.8	0.87	0.66	0.8	0.47	0.7	0.31
AnyNetLvl0	coral6	2.82	2.41	4.23	3.63	0.81	0.79	0.65	0.61	0.47	0.36	0.23	0.2	3.86	3.63	5.38	4.87	0.9	0.87	0.79	0.75	0.62	0.58	0.35	0.37	2.16	1.65	3.33	2.57	0.75	0.74	0.57	0.52	0.37	0.23	0.15	0.1
AnyNetLvl0	dining_room_1_1	9.22	8.57	14.16	13.5	0.95	0.93	0.9	0.86	0.8	0.74	0.56	0.52	9.71	9.7	15.15	15.17	0.95	0.93	0.89	0.85	0.77	0.73	0.54	0.53	8.53	6.95	12.62	10.66	0.96	0.93	0.92	0.86	0.83	0.74	0.6	0.5
AnyNetLvl0	office_top5	2.45	2.35	3.18	3.04	0.86	0.83	0.73	0.71	0.48	0.48	0.19	0.18	2.66	2.75	3.55	3.62	0.86	0.83	0.72	0.71	0.46	0.49	0.23	0.28	2.34	2.14	2.95	2.68	0.86	0.84	0.73	0.71	0.49	0.47	0.17	0.13
AnyNetLvl0	park1	2.4	2.19	3.34	2.84	0.86	0.87	0.7	0.74	0.45	0.44	0.17	0.13	2.02	1.92	3.25	2.78	0.76	0.78	0.56	0.6	0.32	0.32	0.13	0.12	2.81	2.48	3.43	2.9	0.96	0.96	0.86	0.88	0.59	0.57	0.22	0.14
AnyNetLvl0	park10	2.93	2.93	4.03	4.06	0.88	0.86	0.76	0.73	0.53	0.52	0.24	0.26	3.4	3.53	4.61	4.71	0.91	0.9	0.81	0.8	0.6	0.62	0.3	0.35	2.06	1.82	2.67	2.48	0.84	0.78	0.68	0.61	0.4	0.33	0.14	0.11
AnyNetLvl0	park6	5.75	4.99	9.35	8.96	0.91	0.88	0.82	0.77	0.65	0.55	0.41	0.33	9.41	9.14	14.25	14.32	0.94	0.93	0.88	0.86	0.75	0.71	0.56	0.51	3.9	2.89	5.36	4.1	0.9	0.86	0.79	0.73	0.6	0.47	0.34	0.24
AnyNetLvl0	person1_1	16.1	5.61	23.41	9.48	0.92	0.79	0.84	0.63	0.71	0.46	0.62	0.35	11.57	8.63	16.37	12.68	0.92	0.89	0.81	0.8	0.67	0.64	0.55	0.5	17.54	4.66	25.23	8.2	0.92	0.76	0.85	0.57	0.73	0.4	0.64	0.3
AnyNetLvl0	person1_3	5.47	4.76	10.78	9.87	0.87	0.88	0.76	0.75	0.59	0.54	0.37	0.31	8.81	8.21	15.28	14.91	0.92	0.91	0.84	0.84	0.72	0.71	0.55	0.53	3.68	2.92	7.33	5.53	0.84	0.86	0.71	0.71	0.52	0.45	0.27	0.19
AnyNetLvl0	person1_8	8.37	3.77	14.59	5.76	0.88	0.83	0.76	0.66	0.6	0.47	0.43	0.31	8.3	5.51	13.79	7.68	0.89	0.91	0.81	0.8	0.68	0.64	0.52	0.47	8.39	3.35	14.78	5.19	0.87	0.81	0.75	0.63	0.58	0.44	0.41	0.27
AnyNetLvl0	person2_5	3.13	2.06	5.53	2.67	0.87	0.85	0.74	0.7	0.5	0.44	0.2	0.09	3.19	2.34	5.99	3.1	0.88	0.88	0.75	0.75	0.51	0.49	0.19	0.12	3.1	1.9	5.25	2.39	0.87	0.84	0.74	0.68	0.49	0.41	0.21	0.07
AnyNetLvl0	person3_10	3.27	2.33	5.28	3.34	0.86	0.8	0.74	0.63	0.5	0.39	0.26	0.19	4.34	3.66	6.37	4.84	0.89	0.88	0.79	0.8	0.63	0.6	0.42	0.37	2.88	1.84	4.82	2.58	0.86	0.77	0.72	0.57	0.45	0.32	0.2	0.13
AnyNetLvl0	person3_3	3.85	3	5.53	4.18	0.83	0.88	0.72	0.74	0.55	0.5	0.35	0.27	4.58	4.56	6.34	6.07	0.9	0.9	0.79	0.81	0.63	0.66	0.4	0.45	3.6	2.48	5.23	3.31	0.81	0.88	0.69	0.71	0.52	0.44	0.33	0.21
AnyNetLvl0	person3_4	4.29	3.86	7.61	6.09	0.81	0.85	0.66	0.72	0.46	0.53	0.29	0.3	5.92	5.85	9.45	8.37	0.87	0.89	0.75	0.81	0.57	0.66	0.41	0.47	3.36	2.73	6.33	4.28	0.78	0.82	0.62	0.67	0.4	0.46	0.23	0.2
AnyNetLvl0	plant_vintage12	4.33	3.45	6.09	4.66	0.89	0.88	0.79	0.76	0.6	0.58	0.37	0.33	4.37	4.04	6.18	5.3	0.89	0.91	0.78	0.82	0.6	0.65	0.37	0.4	4.27	2.41	5.92	3.23	0.88	0.83	0.79	0.67	0.61	0.46	0.36	0.2
AnyNetLvl0	plant_vintage14	3.28	1.62	5.77	2.23	0.81	0.74	0.66	0.54	0.42	0.3	0.22	0.09	3.31	2.36	6.23	3.01	0.81	0.85	0.66	0.72	0.44	0.5	0.18	0.18	3.27	1.32	5.57	1.82	0.81	0.7	0.66	0.47	0.41	0.21	0.23	0.05
AnyNetLvl0	plant_vintage15	3.9	1.57	7.59	2.18	0.83	0.75	0.67	0.54	0.44	0.28	0.22	0.08	3.94	2.35	7.7	3.01	0.86	0.89	0.71	0.74	0.48	0.47	0.21	0.18	3.88	1.22	7.54	1.68	0.81	0.69	0.65	0.45	0.43	0.19	0.23	0.03
AnyNetLvl0	plant_vintage2	4.07	3.56	6.94	5.1	0.98	0.98	0.94	0.93	0.73	0.7	0.24	0.25	3.8	3.62	6.9	5.65	0.97	0.97	0.92	0.92	0.65	0.68	0.2	0.2	4.23	3.53	6.96	4.76	0.98	0.99	0.95	0.94	0.77	0.72	0.26	0.28
AnyNetLvl0	plant_vintage4	4.25	2.34	7.89	3.62	0.87	0.87	0.75	0.7	0.52	0.39	0.24	0.14	4.11	2.72	7.97	4.06	0.88	0.89	0.75	0.76	0.53	0.48	0.23	0.19	4.34	2.11	7.85	3.32	0.87	0.85	0.75	0.67	0.51	0.34	0.25	0.1
AnyNetLvl0	plant_vintage7	4.11	3.28	5.77	4.56	0.91	0.9	0.81	0.79	0.63	0.56	0.36	0.27	4.07	3.78	5.68	5.26	0.9	0.89	0.79	0.78	0.61	0.58	0.36	0.34	4.15	2.67	5.86	3.55	0.91	0.91	0.83	0.79	0.66	0.52	0.37	0.19
AnyNetLvl0	roundntwist4	4.71	6.91	6.6	10.82	0.93	0.97	0.87	0.92	0.78	0.81	0.49	0.55	3.59	5.07	5.66	9.04	0.89	0.94	0.79	0.86	0.64	0.69	0.31	0.37	6.4	9.66	7.81	13.05	1	1	1	1	0.98	0.99	0.75	0.82
AnyNetLvl0	ScifiKnot1	2.42	2.63	3.51	3.51	0.8	0.85	0.64	0.71	0.39	0.48	0.21	0.23	3.05	3.35	4.17	4.27	0.83	0.89	0.7	0.78	0.5	0.59	0.31	0.34	2.04	2.19	3.04	2.96	0.78	0.82	0.59	0.66	0.32	0.41	0.15	0.16
AnyNetLvl0	ScifiKnot4	5.25	3.33	8.03	6.07	0.87	0.79	0.76	0.63	0.6	0.42	0.4	0.2	6.48	5.66	9.48	8.62	0.9	0.9	0.82	0.81	0.7	0.66	0.48	0.42	4.82	2.53	7.48	4.91	0.85	0.76	0.74	0.57	0.57	0.34	0.37	0.12
AnyNetLvl0	sleeping_room_1_11	1.56	1.58	2.21	2.16	0.76	0.76	0.54	0.58	0.27	0.29	0.05	0.06	2.56	2.59	3.34	3.25	0.88	0.88	0.76	0.77	0.54	0.56	0.16	0.19	1.19	1.21	1.6	1.58	0.72	0.71	0.46	0.5	0.17	0.2	0.02	0.01
AnyNetLvl0	living_room_3_5	2.91	2.91	3.96	3.92	0.85	0.87	0.71	0.76	0.51	0.54	0.26	0.25	3.49	3.62	4.59	4.69	0.9	0.92	0.79	0.83	0.6	0.64	0.34	0.35	2.39	2.29	3.31	3.07	0.81	0.84	0.64	0.69	0.44	0.45	0.19	0.16
AnyNetLvl0	living_room_3_9	2.82	2.69	4	3.15	0.91	0.96	0.8	0.91	0.58	0.66	0.17	0.13	3	2.88	4.67	3.56	0.91	0.94	0.78	0.86	0.55	0.62	0.18	0.2	2.73	2.6	3.61	2.92	0.91	0.97	0.81	0.93	0.6	0.68	0.17	0.1
AnyNetLvl0	mannequins_10	10.29	11.35	17.63	19.27	0.9	0.9	0.8	0.81	0.67	0.66	0.53	0.52	12.95	14.75	20.77	22.91	0.92	0.93	0.85	0.87	0.74	0.75	0.62	0.64	5.65	5.42	10.04	10.17	0.85	0.86	0.72	0.72	0.54	0.51	0.38	0.31
AnyNetLvl0	mannequins_12	7.23	5.13	10.15	7.82	0.92	0.91	0.84	0.82	0.69	0.65	0.55	0.42	7.02	6.28	10.32	9.15	0.89	0.92	0.8	0.85	0.64	0.71	0.48	0.51	7.44	4	9.99	6.26	0.94	0.9	0.87	0.79	0.74	0.59	0.61	0.33
AnyNetLvl0	mannequins_2	5.2	4.29	7.03	5.93	0.95	0.93	0.88	0.85	0.74	0.71	0.52	0.45	4.9	4.72	6.87	6.61	0.94	0.94	0.86	0.88	0.71	0.73	0.47	0.47	5.81	3.45	7.35	4.3	0.96	0.89	0.9	0.79	0.81	0.67	0.61	0.39
AnyNetLvl0	mannequins_5	2.6	2.45	3.3	3.16	0.87	0.85	0.76	0.71	0.53	0.51	0.2	0.19	2.97	2.85	3.63	3.51	0.91	0.9	0.83	0.8	0.62	0.6	0.26	0.24	2.07	1.88	2.77	2.54	0.82	0.78	0.66	0.59	0.39	0.38	0.13	0.1
AnyNetLvl0	mannequins_9	4.77	4.02	6.64	5.66	0.89	0.88	0.8	0.78	0.67	0.63	0.42	0.37	4.64	4.29	6.62	6.08	0.88	0.89	0.79	0.79	0.66	0.63	0.38	0.39	5.07	3.43	6.69	4.6	0.9	0.86	0.82	0.75	0.69	0.63	0.49	0.33
AnyNetLvl0	Minicubes4	5.08	5.03	7.21	7.09	0.88	0.88	0.77	0.78	0.61	0.65	0.44	0.44	4.94	4.96	7.05	6.94	0.89	0.89	0.78	0.8	0.62	0.66	0.43	0.44	5.34	5.16	7.5	7.35	0.86	0.86	0.74	0.75	0.6	0.63	0.46	0.42
AnyNetLvl0	Minicubes5	4.38	4.33	5.76	5.95	0.9	0.89	0.81	0.77	0.64	0.58	0.42	0.42	3.95	3.89	5.32	5.44	0.9	0.89	0.79	0.76	0.59	0.56	0.37	0.37	5	4.96	6.33	6.62	0.9	0.88	0.84	0.78	0.71	0.62	0.5	0.48
AnyNetLvl0	Minicubes9	3.75	3.12	4.61	3.91	0.94	0.92	0.86	0.83	0.71	0.62	0.39	0.27	3.97	3.54	4.94	4.36	0.93	0.93	0.86	0.85	0.72	0.69	0.41	0.35	3.46	2.57	4.15	3.25	0.94	0.9	0.86	0.81	0.7	0.53	0.36	0.17
AnyNetLvl0	moto3	3.33	3.77	4.42	5.78	0.94	0.93	0.86	0.85	0.62	0.63	0.27	0.27	3.5	3.7	4.69	5.82	0.94	0.94	0.89	0.87	0.65	0.67	0.3	0.27	3.19	3.83	4.18	5.75	0.93	0.93	0.84	0.84	0.6	0.59	0.25	0.27
AnyNetLvl0	music1_1	7.72	2.94	16.93	5.35	0.83	0.81	0.66	0.61	0.46	0.35	0.31	0.19	7.51	3.87	16.43	6.73	0.83	0.85	0.69	0.71	0.5	0.49	0.28	0.25	7.82	2.48	17.18	4.51	0.82	0.79	0.65	0.56	0.44	0.29	0.32	0.15
AnyNetLvl0	music1_6	5.18	4.66	7.15	7	0.92	0.9	0.84	0.78	0.69	0.6	0.47	0.4	5.86	5.77	8.07	8.32	0.92	0.93	0.84	0.84	0.72	0.69	0.53	0.49	4.17	3.02	5.52	4.4	0.93	0.86	0.84	0.68	0.65	0.48	0.37	0.27
AnyNetLvl0	music1_7	1.98	1.56	3.44	2.11	0.81	0.75	0.61	0.54	0.31	0.27	0.12	0.08	2.61	2.21	4.64	2.82	0.82	0.82	0.66	0.69	0.46	0.45	0.2	0.18	1.72	1.28	2.78	1.72	0.8	0.72	0.59	0.48	0.24	0.19	0.09	0.04
AnyNetLvl0	music1_9	6.59	3.44	11.02	5.64	0.89	0.85	0.79	0.72	0.62	0.52	0.4	0.24	5.59	5.31	9.12	8.13	0.92	0.92	0.85	0.84	0.68	0.69	0.39	0.39	6.88	2.92	11.49	4.71	0.88	0.83	0.77	0.68	0.6	0.47	0.41	0.2
AnyNetLvl0	nest5	6.92	6.39	21.68	21.61	0.93	0.92	0.86	0.83	0.73	0.64	0.49	0.44	8.32	7.93	27.28	27.28	0.93	0.93	0.87	0.86	0.76	0.72	0.55	0.51	5.26	4.56	11.94	11.69	0.92	0.91	0.85	0.8	0.69	0.55	0.41	0.35
AnyNetLvl0	office1	2.86	2.12	5.07	2.87	0.84	0.86	0.68	0.74	0.42	0.41	0.17	0.09	2.59	2.54	4.1	3.57	0.84	0.85	0.69	0.74	0.45	0.48	0.16	0.15	3.02	1.88	5.54	2.39	0.84	0.87	0.67	0.73	0.4	0.37	0.18	0.06
AnyNetLvl0	office12	4.87	3.7	7.23	5.65	0.87	0.82	0.77	0.68	0.6	0.49	0.41	0.31	6.53	5.51	8.81	7.47	0.93	0.89	0.86	0.77	0.73	0.66	0.57	0.5	3.99	2.74	6.23	4.4	0.84	0.79	0.72	0.63	0.54	0.4	0.33	0.2
AnyNetLvl0	office14	5.79	3.72	9.26	6.61	0.89	0.83	0.79	0.68	0.63	0.45	0.4	0.28	6.24	5.47	9.89	9.1	0.89	0.9	0.8	0.81	0.67	0.62	0.46	0.4	5.46	2.48	8.79	3.99	0.89	0.78	0.78	0.59	0.6	0.33	0.37	0.19
AnyNetLvl0	office2	4.38	3.45	7.3	5.44	0.96	0.97	0.89	0.92	0.62	0.67	0.24	0.18	4.23	4.09	7.71	7.34	0.96	0.94	0.85	0.87	0.56	0.61	0.17	0.21	4.43	3.22	7.14	4.56	0.97	0.98	0.91	0.94	0.64	0.69	0.27	0.17
AnyNetLvl0	sleeping_room_1_15	3.36	1.45	7.35	1.89	0.8	0.75	0.64	0.54	0.39	0.27	0.15	0.04	3.03	1.62	7.09	2.1	0.79	0.79	0.63	0.59	0.36	0.33	0.12	0.04	3.62	1.31	7.54	1.72	0.81	0.72	0.64	0.51	0.41	0.22	0.18	0.03
AnyNetLvl0	sleeping_room_1_3	3.85	3.61	9.57	8.88	0.84	0.83	0.68	0.67	0.44	0.42	0.18	0.16	4.5	4.17	10.46	9.71	0.86	0.85	0.73	0.71	0.5	0.46	0.22	0.21	3.64	3.43	9.26	8.59	0.83	0.83	0.67	0.66	0.42	0.41	0.16	0.15
AnyNetLvl0	sleeping_room_1_7	3.26	2.89	6.04	4.6	0.81	0.83	0.67	0.69	0.48	0.47	0.18	0.21	4.05	3.74	7.62	6.25	0.81	0.78	0.67	0.64	0.49	0.49	0.23	0.27	2.91	2.51	5.16	3.61	0.81	0.85	0.67	0.71	0.47	0.45	0.15	0.18
AnyNetLvl0	spaceStation2	8.26	7.4	10.85	9.63	0.97	0.97	0.93	0.93	0.84	0.83	0.72	0.72	5.95	5.92	8.66	8.56	0.95	0.95	0.89	0.87	0.71	0.7	0.43	0.44	9.44	8.15	11.81	10.13	0.98	0.98	0.95	0.95	0.9	0.9	0.86	0.86
AnyNetLvl0	stack_circles4	13.5	5.03	19.66	7.16	0.92	0.9	0.85	0.79	0.73	0.62	0.6	0.41	9.25	5.71	15.36	8.1	0.91	0.92	0.82	0.85	0.67	0.69	0.46	0.43	15.87	4.65	21.69	6.58	0.92	0.89	0.86	0.76	0.77	0.59	0.68	0.4
AnyNetLvl0	stack_circles9	12.59	4.91	22.72	6.57	0.94	0.93	0.87	0.84	0.78	0.68	0.64	0.46	7.8	5.19	14.76	7.37	0.93	0.89	0.84	0.78	0.71	0.6	0.47	0.42	15.6	4.73	26.53	6.01	0.95	0.95	0.89	0.88	0.82	0.73	0.74	0.48
AnyNetLvl0	time_travellers_10	23.63	17.24	34.37	27.76	0.9	0.87	0.83	0.78	0.72	0.63	0.57	0.5	22.76	20.48	34.13	32.14	0.91	0.91	0.84	0.83	0.72	0.68	0.56	0.51	23.99	15.91	34.46	25.76	0.9	0.86	0.82	0.75	0.72	0.61	0.57	0.5
AnyNetLvl0	time_travellers_13	10.45	5.27	13.27	7.01	0.94	0.94	0.89	0.88	0.8	0.73	0.66	0.47	8.74	6.45	12.3	8.37	0.92	0.95	0.84	0.89	0.7	0.8	0.52	0.56	11.63	4.47	13.89	5.9	0.96	0.94	0.93	0.87	0.86	0.69	0.76	0.42
AnyNetLvl0	time_travellers_15	15.45	8.32	20.57	12.8	0.93	0.91	0.87	0.83	0.78	0.7	0.67	0.54	12.81	10.4	18.24	15.61	0.94	0.92	0.87	0.84	0.77	0.71	0.6	0.53	16.98	7.12	21.8	10.85	0.93	0.91	0.87	0.83	0.79	0.69	0.71	0.54
AnyNetLvl0	time_travellers_2	9.46	6.51	11.96	8.92	0.96	0.92	0.9	0.83	0.77	0.7	0.63	0.52	8.11	7.07	10.84	9.34	0.95	0.92	0.89	0.85	0.74	0.75	0.54	0.58	10.43	6.11	12.7	8.6	0.97	0.91	0.91	0.81	0.79	0.66	0.69	0.47
AnyNetLvl0	time_travellers_20	7.24	2.87	9.54	3.62	0.96	0.91	0.91	0.8	0.82	0.56	0.66	0.25	6.56	3.66	9.99	4.46	0.92	0.93	0.84	0.85	0.68	0.69	0.5	0.39	7.59	2.46	9.3	3.1	0.98	0.89	0.96	0.77	0.89	0.5	0.74	0.18
AnyNetLvl0	time_travellers_24	28.01	10.06	38.95	21.16	0.95	0.85	0.89	0.73	0.8	0.54	0.71	0.33	24.42	18.46	37.24	31.55	0.92	0.93	0.84	0.86	0.72	0.74	0.59	0.52	29.23	7.2	39.52	16.17	0.96	0.83	0.91	0.68	0.83	0.47	0.75	0.27
AnyNetLvl0	time_travellers_25	11.9	7.33	17.26	11.69	0.92	0.9	0.82	0.81	0.66	0.67	0.54	0.54	12	9.81	18.42	15.17	0.92	0.93	0.83	0.85	0.66	0.73	0.5	0.57	11.83	5.7	16.44	8.66	0.91	0.88	0.82	0.78	0.66	0.63	0.57	0.51
AnyNetLvl0	time_travellers_3	15.89	7.95	21.18	12.6	0.92	0.93	0.85	0.84	0.76	0.69	0.69	0.51	11.92	8.9	17.81	14.1	0.89	0.92	0.8	0.85	0.69	0.72	0.57	0.56	18.85	7.24	23.37	11.36	0.95	0.94	0.89	0.84	0.82	0.67	0.78	0.48
AnyNetLvl0	twirls2	3.17	3.49	4.2	4.53	0.9	0.93	0.79	0.84	0.61	0.64	0.28	0.33	3.78	4.09	4.92	5.29	0.91	0.94	0.83	0.87	0.7	0.71	0.38	0.42	2.77	3.1	3.66	3.97	0.9	0.93	0.77	0.83	0.55	0.6	0.22	0.28
AnyNetLvl0	twirls3	3.49	3.26	5.59	4.65	0.92	0.92	0.84	0.83	0.6	0.64	0.23	0.26	3.87	3.81	6.31	5.79	0.88	0.91	0.78	0.82	0.62	0.65	0.3	0.34	3.29	2.99	5.19	3.97	0.94	0.92	0.87	0.84	0.59	0.64	0.19	0.21
AnyNetLvl0	voronoid_sphere6	7.37	6.89	10.97	10.95	0.93	0.89	0.85	0.78	0.72	0.63	0.5	0.42	8.13	8.49	11.75	12.65	0.93	0.91	0.87	0.82	0.74	0.69	0.52	0.5	6.1	4.19	9.54	7.26	0.91	0.87	0.82	0.72	0.7	0.52	0.47	0.29
AnyNetLvl0	voronoid_sphere9	5.4	5.55	7.22	7.59	0.91	0.89	0.81	0.78	0.66	0.61	0.47	0.48	5.13	5.3	7.11	7.53	0.89	0.88	0.79	0.75	0.62	0.56	0.42	0.42	6.98	7.03	7.81	7.98	0.98	0.97	0.96	0.92	0.91	0.87	0.77	0.8
AnyNetLvl0	walker4	5.99	5.17	8.17	7.34	0.91	0.9	0.79	0.79	0.66	0.62	0.53	0.46	5.82	5.5	8.48	8.19	0.9	0.9	0.75	0.76	0.55	0.55	0.46	0.43	6.1	4.96	7.97	6.76	0.91	0.91	0.82	0.81	0.72	0.67	0.58	0.47
AnyNetLvl0	windmills4	4.08	4.24	6.07	6.13	0.95	0.94	0.89	0.87	0.71	0.72	0.39	0.42	5.12	5.32	8.41	8.22	0.94	0.94	0.86	0.85	0.68	0.71	0.46	0.48	3.79	3.94	5.23	5.41	0.96	0.94	0.89	0.87	0.72	0.72	0.37	0.4
AnyNetLvl0	youngster_room10	3.77	2.33	8.1	3.34	0.81	0.85	0.66	0.7	0.43	0.42	0.23	0.15	3.81	3.19	7.22	4.52	0.88	0.89	0.77	0.78	0.55	0.53	0.28	0.26	3.75	1.92	8.49	2.59	0.78	0.83	0.6	0.66	0.37	0.37	0.2	0.09
AnyNetLvl0	youngster_room14	4.55	2.93	6.87	4.21	0.85	0.85	0.73	0.69	0.54	0.47	0.36	0.24	4.11	3.3	6.8	4.7	0.85	0.88	0.71	0.76	0.49	0.54	0.28	0.25	4.79	2.74	6.9	3.93	0.85	0.84	0.73	0.66	0.57	0.43	0.4	0.24
AnyNetLvl0	youngster_room4	2.66	2.16	4.25	3.21	0.83	0.76	0.66	0.58	0.41	0.36	0.18	0.17	2.84	2.35	4.83	3.61	0.85	0.8	0.69	0.63	0.41	0.37	0.17	0.16	2.57	2.06	3.92	2.99	0.83	0.74	0.65	0.55	0.41	0.36	0.18	0.17
AnyNetLvl0	youngster_room7	1.96	1.54	2.71	2.09	0.81	0.75	0.63	0.53	0.36	0.27	0.13	0.09	2.3	2.11	3.06	2.66	0.85	0.85	0.71	0.69	0.44	0.43	0.17	0.16	1.78	1.25	2.52	1.73	0.78	0.7	0.59	0.46	0.31	0.19	0.11	0.05
AnyNetLvl0	youngster_room9	2.27	1.45	3.62	1.97	0.77	0.76	0.58	0.53	0.36	0.26	0.15	0.05	2.92	2.24	4.26	2.83	0.87	0.86	0.76	0.74	0.52	0.48	0.2	0.13	1.99	1.12	3.31	1.45	0.73	0.72	0.5	0.44	0.29	0.16	0.13	0.01
AnyNetLvl0	dining_room_1_13	2.46	1.93	3.6	2.81	0.8	0.81	0.63	0.62	0.42	0.34	0.21	0.09	2.49	2.28	3.88	3.37	0.79	0.83	0.62	0.66	0.41	0.43	0.17	0.12	2.44	1.72	3.42	2.41	0.81	0.8	0.64	0.6	0.43	0.29	0.22	0.07
AnyNetLvl0	living_room_3_2	2.9	2.94	3.72	4.16	0.94	0.93	0.87	0.86	0.65	0.63	0.17	0.17	3.49	3.64	4.88	6.04	0.89	0.87	0.81	0.76	0.66	0.59	0.31	0.25	2.73	2.74	3.32	3.44	0.95	0.94	0.89	0.88	0.64	0.64	0.13	0.15
AnyNetLvl0	office_top4	4.21	3.42	7.54	5.17	0.96	0.93	0.9	0.85	0.64	0.59	0.22	0.21	3.92	3.29	7.36	5.56	0.91	0.87	0.82	0.73	0.55	0.5	0.2	0.19	4.34	3.48	7.61	4.98	0.98	0.95	0.93	0.9	0.68	0.63	0.22	0.22
AnyNetLvl0	sleeping_room_1_13	4.3	2.96	8.21	4.36	0.86	0.84	0.73	0.68	0.52	0.46	0.3	0.26	3.51	3.2	5.65	4.63	0.89	0.88	0.77	0.76	0.51	0.51	0.27	0.26	4.57	2.87	8.92	4.26	0.85	0.83	0.72	0.66	0.53	0.45	0.3	0.26
AnyNetLvl0	dining_room_1_5	3.34	3.42	4.5	4.67	0.92	0.93	0.84	0.85	0.6	0.62	0.28	0.26	3.84	3.75	5.36	5.35	0.89	0.89	0.8	0.8	0.6	0.6	0.34	0.31	2.85	3.09	3.47	3.89	0.95	0.96	0.88	0.9	0.6	0.64	0.22	0.22
AnyNetLvl0	dining_room_1_7	8.2	6.57	12.05	10.38	0.92	0.91	0.85	0.81	0.74	0.63	0.54	0.42	7.98	7.55	12.01	11.66	0.91	0.93	0.83	0.82	0.71	0.66	0.52	0.46	8.45	5.43	12.1	8.67	0.93	0.89	0.87	0.79	0.77	0.6	0.57	0.37
AnyNetLvl0	dining_room_1_9	2.92	2.95	3.62	3.66	0.93	0.93	0.84	0.84	0.63	0.63	0.23	0.22	2.7	2.76	3.63	3.69	0.9	0.9	0.78	0.78	0.53	0.52	0.19	0.19	3.16	3.16	3.61	3.63	0.97	0.96	0.91	0.9	0.74	0.75	0.27	0.25
AnyNetLvl0	floating_cubes1	4.42	4.15	5.61	5.36	0.9	0.89	0.8	0.79	0.67	0.66	0.5	0.47	4.67	4.57	6	5.98	0.91	0.9	0.82	0.8	0.7	0.68	0.52	0.51	4.23	3.83	5.29	4.83	0.89	0.88	0.79	0.78	0.65	0.65	0.49	0.44
AnyNetLvl0	fruit1	4.64	4	8.8	6.41	0.93	0.93	0.84	0.86	0.63	0.67	0.31	0.27	4.7	4.31	9.74	7.89	0.92	0.89	0.8	0.78	0.58	0.54	0.25	0.28	4.61	3.83	8.24	5.44	0.94	0.96	0.86	0.91	0.66	0.74	0.35	0.27
AnyNetLvl0	fruit6	2.73	2.51	4.06	3.69	0.82	0.8	0.65	0.63	0.41	0.4	0.23	0.2	4	3.73	5.47	4.97	0.89	0.91	0.8	0.81	0.61	0.61	0.37	0.32	2.22	2.02	3.33	3.03	0.79	0.75	0.59	0.56	0.33	0.31	0.18	0.16
AnyNetLvl0	fruit8	2.71	1.66	4.99	2.36	0.79	0.78	0.62	0.57	0.4	0.29	0.18	0.08	3.45	2.39	5.93	3.23	0.83	0.86	0.72	0.72	0.57	0.48	0.24	0.16	2.36	1.32	4.48	1.81	0.77	0.75	0.58	0.51	0.32	0.2	0.15	0.04
AnyNetLvl0	hacienda1	3.34	3.12	4.21	3.98	0.97	0.95	0.91	0.89	0.69	0.66	0.26	0.21	3.25	3.06	4.34	4.08	0.95	0.96	0.88	0.88	0.63	0.61	0.23	0.18	3.44	3.19	4.06	3.86	0.98	0.94	0.94	0.89	0.76	0.71	0.29	0.25
AnyNetLvl0	hacienda4	4.03	3.77	5.88	5.02	0.96	0.97	0.91	0.93	0.73	0.78	0.28	0.27	3.51	3.36	5.76	4.9	0.96	0.97	0.9	0.92	0.65	0.71	0.2	0.19	4.61	4.23	6.01	5.16	0.96	0.97	0.92	0.95	0.82	0.87	0.38	0.35
AnyNetLvl0	hacienda8	16.03	19.42	26.87	31.08	0.98	0.98	0.96	0.96	0.8	0.8	0.51	0.56	8.85	10	17.39	19.7	0.98	0.98	0.95	0.95	0.75	0.74	0.32	0.34	18.71	22.94	29.65	34.37	0.98	0.98	0.97	0.96	0.82	0.83	0.58	0.65
AnyNetLvl0	landscape1_5	5.62	4.36	10.85	7.99	0.88	0.85	0.76	0.71	0.54	0.51	0.33	0.3	7.12	6.23	13.11	10.65	0.9	0.89	0.81	0.8	0.64	0.64	0.41	0.42	4.66	3.15	9.09	5.62	0.86	0.82	0.73	0.65	0.48	0.42	0.27	0.22
AnyNetLvl0	landscape1_6	3.26	2.67	4.45	3.89	0.87	0.83	0.75	0.69	0.57	0.45	0.3	0.21	4.17	3.67	5.48	5.01	0.91	0.9	0.83	0.8	0.68	0.61	0.41	0.34	2.51	1.85	3.37	2.62	0.84	0.78	0.69	0.59	0.48	0.32	0.21	0.11
AnyNetLvl0	landscape3_2	5.26	5.11	9.02	8.87	0.92	0.89	0.84	0.8	0.66	0.61	0.37	0.38	6.15	6.09	11.52	11.23	0.89	0.89	0.81	0.8	0.61	0.61	0.35	0.36	4.62	4.4	6.68	6.68	0.94	0.89	0.87	0.8	0.69	0.61	0.39	0.39
AnyNetLvl0	landscape5_2	26.85	10.9	46.33	19.98	0.99	0.98	0.98	0.93	0.89	0.82	0.52	0.38	16.05	10.23	33.14	20.12	0.99	0.96	0.99	0.9	0.81	0.71	0.36	0.29	29.09	11.04	48.62	19.95	0.99	0.98	0.98	0.94	0.91	0.84	0.56	0.4
AnyNetLvl0	living_room_1_1	3.15	2.55	4.84	3.17	0.9	0.92	0.8	0.82	0.59	0.53	0.2	0.17	2.87	2.55	4.92	3.3	0.86	0.89	0.75	0.77	0.53	0.52	0.16	0.18	3.46	2.54	4.75	3.02	0.95	0.95	0.87	0.87	0.66	0.55	0.24	0.17
AnyNetLvl0	living_room_2_3	3.08	2.9	4.39	3.62	0.94	0.94	0.86	0.88	0.61	0.62	0.18	0.21	4.45	3.76	6.89	5.08	0.93	0.93	0.85	0.85	0.63	0.65	0.28	0.31	2.74	2.69	3.51	3.16	0.94	0.95	0.86	0.89	0.61	0.61	0.16	0.18
CascadeStereo	abstract_bowls_1	1.16	0.97	2.57	1.6	0.68	0.68	0.39	0.31	0.13	0.06	0.04	0.02	1.19	1.13	3.36	2.09	0.64	0.66	0.33	0.33	0.12	0.1	0.04	0.05	1.14	0.82	1.59	0.98	0.71	0.71	0.43	0.31	0.14	0.03	0.03	0
CascadeStereo	abstract_bowls_14	3.64	1.32	6.15	2.27	0.73	0.61	0.54	0.35	0.4	0.17	0.29	0.08	2.51	1.59	5.28	2.87	0.65	0.66	0.41	0.38	0.24	0.18	0.15	0.11	4.33	1.15	6.62	1.82	0.78	0.59	0.62	0.34	0.5	0.16	0.37	0.07
CascadeStereo	bones_3	2.48	3.21	6.29	7.63	0.74	0.79	0.42	0.44	0.19	0.19	0.09	0.13	3.1	4.2	7.49	9.08	0.72	0.77	0.44	0.52	0.21	0.26	0.13	0.18	1.14	1.05	1.77	2.23	0.79	0.82	0.37	0.28	0.13	0.04	0.02	0.02
CascadeStereo	bones_6	3.21	4.6	7.86	9.95	0.72	0.76	0.47	0.51	0.23	0.3	0.13	0.19	3.55	5.08	8.51	10.67	0.71	0.75	0.48	0.53	0.25	0.32	0.15	0.21	1.93	2.8	4.68	6.64	0.76	0.78	0.43	0.44	0.18	0.21	0.07	0.11
CascadeStereo	Chairs4	1.45	2.38	2.49	3.73	0.63	0.79	0.38	0.59	0.2	0.34	0.09	0.19	1.58	2.33	2.65	3.73	0.65	0.77	0.41	0.57	0.23	0.32	0.1	0.18	1.04	2.52	1.88	3.7	0.57	0.84	0.28	0.65	0.12	0.39	0.04	0.21
CascadeStereo	chess_8	1.59	0.85	2.95	1.4	0.57	0.61	0.29	0.26	0.19	0.05	0.14	0.02	1.53	0.99	2.85	1.75	0.58	0.61	0.29	0.27	0.18	0.08	0.13	0.04	1.65	0.71	3.04	0.95	0.57	0.61	0.29	0.24	0.2	0.02	0.16	0
CascadeStereo	childroom_1	0.94	1.14	1.65	2.2	0.58	0.65	0.24	0.31	0.1	0.08	0.04	0.05	1.07	1.26	1.95	2.47	0.58	0.63	0.27	0.34	0.12	0.11	0.05	0.05	0.85	1.06	1.4	1.99	0.58	0.66	0.22	0.29	0.08	0.06	0.02	0.04
CascadeStereo	childroom_12	4.83	2.02	10.04	5.32	0.66	0.59	0.45	0.33	0.31	0.16	0.25	0.1	8.2	3.37	13.94	7.45	0.78	0.68	0.61	0.46	0.47	0.28	0.4	0.18	1.49	0.69	2.91	1.13	0.55	0.5	0.3	0.2	0.16	0.03	0.11	0.02
CascadeStereo	childroom_2	1.85	1.98	5.19	5.59	0.69	0.69	0.4	0.4	0.18	0.15	0.08	0.08	1.9	2.83	4.75	7.58	0.69	0.71	0.44	0.46	0.21	0.23	0.09	0.13	1.8	1.2	5.57	2.66	0.69	0.68	0.36	0.34	0.16	0.09	0.07	0.04
CascadeStereo	childroom_4	0.57	0.68	0.9	0.99	0.49	0.55	0.12	0.22	0.01	0.02	0	0	0.68	0.84	1.1	1.24	0.58	0.67	0.17	0.3	0.01	0.04	0	0.01	0.46	0.51	0.62	0.64	0.39	0.44	0.07	0.13	0	0	0	0
CascadeStereo	childroom_6	0.77	0.75	1.19	1.17	0.57	0.56	0.2	0.21	0.06	0.04	0.01	0.01	0.87	0.93	1.39	1.52	0.6	0.62	0.26	0.28	0.08	0.08	0.02	0.02	0.68	0.59	0.98	0.74	0.55	0.5	0.15	0.15	0.04	0.01	0.01	0
CascadeStereo	childroom_9	0.97	1.04	1.65	2.01	0.57	0.59	0.31	0.32	0.12	0.11	0.03	0.03	1.12	1.45	2.12	2.9	0.65	0.69	0.32	0.37	0.12	0.15	0.04	0.07	0.89	0.81	1.3	1.23	0.52	0.54	0.3	0.29	0.13	0.09	0.02	0
CascadeStereo	cloth4	1.06	0.91	2.97	3.43	0.54	0.48	0.25	0.2	0.09	0.03	0.04	0.01	1.64	1.46	5.51	5.46	0.6	0.57	0.35	0.28	0.11	0.04	0.05	0.03	0.9	0.77	1.76	2.64	0.52	0.46	0.23	0.17	0.08	0.03	0.04	0.01
CascadeStereo	cloth6	0.87	0.67	1.47	0.86	0.58	0.56	0.25	0.23	0.07	0.02	0.03	0	1.04	0.77	1.8	1.03	0.57	0.58	0.31	0.28	0.12	0.05	0.04	0	0.79	0.62	1.27	0.76	0.58	0.56	0.23	0.2	0.05	0	0.02	0
CascadeStereo	cloth7	5.77	1.34	12.13	2.59	0.69	0.66	0.49	0.32	0.37	0.13	0.3	0.06	3.31	1.71	9.03	3.21	0.66	0.7	0.37	0.4	0.23	0.18	0.17	0.1	7.85	1.02	14.23	1.9	0.72	0.62	0.58	0.24	0.49	0.09	0.41	0.04
CascadeStereo	coral6	1.27	1.19	2.3	2.14	0.64	0.65	0.35	0.34	0.15	0.11	0.07	0.06	1.77	1.78	2.96	2.99	0.74	0.71	0.48	0.46	0.24	0.23	0.11	0.12	0.97	0.83	1.77	1.36	0.57	0.62	0.27	0.26	0.09	0.03	0.04	0.02
CascadeStereo	dining_room_1_1	2.72	3.88	6.91	8.87	0.63	0.72	0.4	0.49	0.22	0.3	0.14	0.2	3.69	5.41	8.38	11.01	0.72	0.79	0.5	0.59	0.3	0.4	0.2	0.29	1.35	1.72	3.97	4.24	0.48	0.61	0.25	0.35	0.11	0.15	0.06	0.08
CascadeStereo	office_top5	0.71	0.71	0.95	0.95	0.57	0.59	0.25	0.2	0.03	0.02	0	0.01	0.8	0.92	1.13	1.29	0.59	0.67	0.3	0.33	0.05	0.06	0.01	0.02	0.66	0.6	0.83	0.72	0.56	0.55	0.22	0.14	0.01	0	0	0
CascadeStereo	park1	0.63	0.66	0.84	0.89	0.52	0.54	0.16	0.18	0.02	0.02	0	0	0.79	0.83	1.05	1.1	0.62	0.65	0.28	0.3	0.04	0.05	0.01	0.01	0.46	0.47	0.55	0.58	0.42	0.44	0.04	0.06	0	0	0	0
CascadeStereo	park10	1.13	1.54	2.13	2.74	0.61	0.73	0.31	0.46	0.11	0.18	0.05	0.08	1.36	1.91	2.57	3.33	0.63	0.73	0.35	0.5	0.15	0.26	0.08	0.12	0.71	0.87	0.88	1.03	0.59	0.72	0.24	0.39	0.03	0.02	0	0
CascadeStereo	park6	1.2	1.98	3.17	5.47	0.61	0.63	0.33	0.34	0.09	0.12	0.03	0.08	2.11	4.43	5.3	9.31	0.67	0.73	0.41	0.48	0.2	0.3	0.09	0.22	0.73	0.74	0.94	1.05	0.57	0.58	0.29	0.27	0.03	0.03	0	0
CascadeStereo	person1_1	27.35	1.43	47.18	4.45	0.72	0.63	0.6	0.2	0.52	0.05	0.49	0.04	14.06	2.96	30.71	7.39	0.66	0.62	0.49	0.33	0.35	0.16	0.32	0.12	31.56	0.95	51.31	2.98	0.74	0.63	0.63	0.15	0.57	0.02	0.54	0.01
CascadeStereo	person1_3	1.69	3.42	5.46	12.14	0.72	0.8	0.37	0.48	0.12	0.16	0.05	0.07	2.5	4.46	7.35	14.12	0.71	0.79	0.46	0.49	0.22	0.22	0.1	0.12	1.26	2.86	4.11	10.93	0.72	0.81	0.33	0.47	0.06	0.12	0.02	0.04
CascadeStereo	person1_8	14.61	2.83	32.44	8.1	0.67	0.74	0.49	0.41	0.36	0.19	0.33	0.15	13.5	5.03	32.47	14.46	0.57	0.68	0.39	0.42	0.32	0.27	0.29	0.21	14.88	2.29	32.43	5.54	0.7	0.75	0.52	0.4	0.37	0.17	0.34	0.14
CascadeStereo	person2_5	1.53	0.9	4.93	1.33	0.66	0.67	0.33	0.3	0.12	0.06	0.07	0.02	1.69	1.11	5.74	1.77	0.64	0.67	0.34	0.34	0.14	0.12	0.08	0.05	1.44	0.78	4.42	0.99	0.68	0.66	0.33	0.28	0.11	0.02	0.06	0.01
CascadeStereo	person3_10	1.67	1.42	5.66	2.69	0.59	0.68	0.32	0.41	0.12	0.14	0.05	0.07	3.05	2.06	9.55	3.79	0.65	0.7	0.42	0.44	0.2	0.26	0.11	0.15	1.16	1.19	3.22	2.16	0.57	0.67	0.28	0.4	0.09	0.1	0.03	0.04
CascadeStereo	person3_3	2.91	1.09	8.85	2.32	0.72	0.66	0.48	0.32	0.25	0.07	0.17	0.03	4.26	1.92	13.38	4.08	0.64	0.67	0.44	0.41	0.25	0.2	0.17	0.09	2.46	0.82	6.66	1.26	0.75	0.66	0.49	0.29	0.25	0.03	0.16	0.01
CascadeStereo	person3_4	2.02	2.13	5.43	5.16	0.65	0.7	0.34	0.42	0.12	0.17	0.07	0.07	2.67	3.15	6.67	6.83	0.62	0.71	0.35	0.45	0.18	0.24	0.11	0.14	1.64	1.55	4.57	3.91	0.66	0.69	0.33	0.4	0.09	0.12	0.05	0.03
CascadeStereo	plant_vintage12	1.99	1.45	3.97	3.05	0.61	0.67	0.33	0.32	0.2	0.13	0.14	0.07	1.88	1.89	3.8	3.75	0.63	0.71	0.35	0.44	0.19	0.19	0.12	0.1	2.2	0.66	4.27	0.9	0.58	0.61	0.29	0.13	0.22	0.01	0.18	0
CascadeStereo	plant_vintage14	3.79	0.6	17.95	0.75	0.55	0.54	0.26	0.13	0.07	0.01	0.05	0	3.41	0.74	17.18	0.93	0.62	0.64	0.28	0.22	0.07	0.03	0.04	0	3.95	0.54	18.26	0.66	0.52	0.49	0.26	0.09	0.07	0	0.05	0
CascadeStereo	plant_vintage15	1.33	0.62	6.26	0.75	0.52	0.58	0.21	0.15	0.07	0.01	0.02	0	1.12	0.75	4.5	0.9	0.6	0.68	0.26	0.24	0.07	0.02	0.01	0	1.43	0.56	6.9	0.67	0.49	0.54	0.18	0.11	0.06	0	0.02	0
CascadeStereo	plant_vintage2	1.53	0.61	8.08	0.87	0.52	0.47	0.2	0.17	0.05	0.03	0.02	0	1.82	0.64	10.12	0.92	0.53	0.48	0.25	0.2	0.05	0.02	0.02	0.01	1.36	0.6	6.64	0.85	0.52	0.46	0.18	0.15	0.04	0.03	0.02	0
CascadeStereo	plant_vintage4	5.18	0.61	21.69	0.77	0.55	0.56	0.23	0.12	0.1	0.01	0.06	0	3.37	0.64	17.17	0.91	0.43	0.48	0.22	0.19	0.08	0.04	0.04	0.01	6.27	0.6	23.99	0.67	0.62	0.61	0.23	0.08	0.11	0	0.08	0
CascadeStereo	plant_vintage7	1.01	1.17	1.86	2.29	0.63	0.67	0.25	0.27	0.08	0.1	0.04	0.06	1.21	1.55	2.37	3.01	0.56	0.63	0.26	0.35	0.12	0.16	0.08	0.1	0.78	0.72	0.95	0.85	0.71	0.73	0.24	0.18	0.03	0.01	0	0
CascadeStereo	roundntwist4	1.14	0.91	1.65	1.67	0.63	0.56	0.39	0.27	0.19	0.1	0.03	0.02	1.06	1.04	1.57	1.87	0.6	0.62	0.37	0.33	0.17	0.13	0.03	0.02	1.26	0.72	1.75	1.31	0.67	0.47	0.44	0.17	0.22	0.05	0.04	0.02
CascadeStereo	ScifiKnot1	1.37	1.25	4.09	2.03	0.58	0.68	0.31	0.37	0.14	0.12	0.08	0.08	1.94	1.55	6.18	2.54	0.65	0.69	0.41	0.41	0.22	0.18	0.13	0.12	1.02	1.06	1.9	1.64	0.54	0.67	0.26	0.35	0.1	0.09	0.05	0.06
CascadeStereo	ScifiKnot4	2.55	1.65	4.12	3.46	0.76	0.61	0.6	0.38	0.41	0.18	0.19	0.09	3.41	3.3	5.52	5.78	0.82	0.79	0.66	0.6	0.48	0.39	0.25	0.23	2.26	1.09	3.51	2.15	0.74	0.55	0.57	0.3	0.38	0.1	0.18	0.05
CascadeStereo	sleeping_room_1_11	0.74	0.73	0.98	0.95	0.61	0.62	0.25	0.28	0.03	0.01	0	0	0.84	0.8	1.17	1.21	0.61	0.6	0.31	0.28	0.06	0.04	0.01	0.01	0.7	0.71	0.9	0.84	0.61	0.63	0.23	0.28	0.02	0	0	0
CascadeStereo	living_room_3_5	1.36	1.6	3.02	2.82	0.61	0.72	0.28	0.48	0.12	0.19	0.07	0.08	1.39	2.16	3.2	3.6	0.64	0.77	0.3	0.55	0.13	0.28	0.07	0.15	1.34	1.11	2.85	1.86	0.59	0.67	0.27	0.42	0.12	0.1	0.07	0.03
CascadeStereo	living_room_3_9	0.73	0.78	0.99	1.05	0.56	0.63	0.23	0.24	0.06	0.05	0	0.01	0.77	0.9	1.11	1.31	0.56	0.61	0.25	0.32	0.07	0.08	0	0.02	0.72	0.72	0.93	0.9	0.56	0.64	0.22	0.21	0.05	0.03	0	0
CascadeStereo	mannequins_10	3.14	9.14	8.07	19.18	0.73	0.71	0.45	0.48	0.26	0.33	0.15	0.26	3.87	12.54	9.61	23.1	0.76	0.77	0.52	0.59	0.31	0.44	0.18	0.35	1.87	3.22	4.2	8.84	0.69	0.6	0.33	0.3	0.17	0.14	0.1	0.12
CascadeStereo	mannequins_12	6.38	2.31	12.88	4.9	0.79	0.68	0.55	0.4	0.43	0.19	0.38	0.14	4.94	3.22	10.86	6.09	0.74	0.76	0.46	0.51	0.33	0.29	0.28	0.21	7.78	1.42	14.59	3.35	0.84	0.6	0.64	0.3	0.54	0.09	0.48	0.07
CascadeStereo	mannequins_2	3.07	1.93	5.99	4.68	0.7	0.65	0.48	0.38	0.31	0.17	0.22	0.09	2.65	2.49	5.96	5.61	0.68	0.69	0.43	0.45	0.23	0.23	0.16	0.13	3.91	0.83	6.04	1.78	0.73	0.57	0.59	0.25	0.47	0.05	0.33	0.02
CascadeStereo	mannequins_5	0.98	1.11	1.45	1.77	0.65	0.63	0.36	0.35	0.08	0.14	0.03	0.04	1.02	1.14	1.62	1.89	0.63	0.62	0.33	0.35	0.1	0.13	0.04	0.04	0.92	1.07	1.17	1.59	0.68	0.64	0.4	0.34	0.05	0.16	0.01	0.03
CascadeStereo	mannequins_9	1.41	1.72	2.32	3.83	0.68	0.63	0.38	0.36	0.2	0.16	0.08	0.08	1.28	2.09	2.17	4.39	0.67	0.68	0.38	0.42	0.17	0.2	0.05	0.11	1.68	0.9	2.63	2.09	0.69	0.51	0.38	0.22	0.24	0.05	0.17	0.03
CascadeStereo	Minicubes4	3.4	3.06	5.77	5.36	0.72	0.66	0.52	0.44	0.34	0.31	0.27	0.26	3.05	2.87	5.47	5.23	0.69	0.69	0.48	0.44	0.31	0.29	0.23	0.22	4.06	3.41	6.3	5.59	0.77	0.61	0.6	0.43	0.4	0.36	0.34	0.33
CascadeStereo	Minicubes5	3.08	2.81	5.14	5.25	0.7	0.68	0.5	0.45	0.36	0.31	0.27	0.26	2.47	2.31	4.5	5.04	0.68	0.65	0.46	0.41	0.3	0.25	0.2	0.18	3.96	3.53	5.94	5.55	0.74	0.73	0.56	0.5	0.44	0.4	0.38	0.36
CascadeStereo	Minicubes9	3.16	1.11	10.41	1.84	0.72	0.68	0.53	0.36	0.33	0.1	0.15	0.04	2.32	1.26	8.7	2.24	0.65	0.63	0.44	0.34	0.23	0.14	0.11	0.07	4.22	0.91	12.25	1.16	0.81	0.74	0.65	0.37	0.46	0.04	0.2	0.01
CascadeStereo	moto3	0.88	1.17	1.24	1.74	0.61	0.67	0.28	0.35	0.09	0.16	0.02	0.07	1.12	1.38	1.53	2	0.72	0.73	0.38	0.42	0.15	0.21	0.03	0.09	0.68	1	0.93	1.51	0.51	0.62	0.19	0.3	0.04	0.12	0	0.04
CascadeStereo	music1_1	2.35	1.84	5.69	4.34	0.66	0.68	0.36	0.36	0.19	0.14	0.11	0.09	2.7	2.28	6.99	5.52	0.61	0.69	0.34	0.39	0.18	0.18	0.12	0.11	2.17	1.62	4.92	3.61	0.68	0.67	0.37	0.35	0.19	0.12	0.1	0.08
CascadeStereo	music1_6	1.73	2.33	3.42	5.21	0.71	0.71	0.4	0.4	0.2	0.2	0.11	0.12	2	3.22	3.97	6.45	0.7	0.75	0.44	0.52	0.24	0.29	0.12	0.19	1.35	1.01	2.38	2.41	0.72	0.64	0.33	0.22	0.13	0.06	0.08	0.03
CascadeStereo	music1_7	1.09	0.74	2.29	1.02	0.6	0.6	0.26	0.22	0.12	0.04	0.05	0.01	1.37	1.01	2.89	1.48	0.64	0.65	0.37	0.33	0.18	0.12	0.07	0.03	0.97	0.62	1.97	0.74	0.58	0.57	0.21	0.18	0.09	0	0.05	0
CascadeStereo	music1_9	10.95	1.46	25.28	2.84	0.73	0.61	0.6	0.39	0.51	0.18	0.38	0.07	7.99	2.21	19.65	4.47	0.6	0.56	0.41	0.4	0.31	0.27	0.24	0.13	11.78	1.26	26.64	2.18	0.77	0.63	0.65	0.38	0.56	0.15	0.42	0.05
CascadeStereo	nest5	3.59	3.75	18.67	18.84	0.77	0.74	0.58	0.52	0.35	0.32	0.17	0.19	4.83	5.25	23.89	24.09	0.79	0.81	0.59	0.63	0.38	0.43	0.23	0.27	2.11	1.96	9.1	9.27	0.75	0.65	0.56	0.38	0.3	0.18	0.09	0.1
CascadeStereo	office1	2.97	0.55	11.24	0.66	0.67	0.51	0.3	0.11	0.11	0	0.06	0	1.87	0.66	8.66	0.81	0.64	0.6	0.29	0.2	0.06	0.01	0.03	0	3.59	0.48	12.45	0.57	0.69	0.45	0.31	0.06	0.14	0	0.08	0
CascadeStereo	office12	2.84	1.95	3.98	4.42	0.79	0.61	0.67	0.32	0.5	0.15	0.28	0.11	3.24	3.25	4.56	6.22	0.85	0.69	0.73	0.45	0.53	0.28	0.3	0.21	2.63	1.26	3.63	3.07	0.76	0.56	0.64	0.24	0.49	0.08	0.27	0.06
CascadeStereo	office14	2.31	2.46	5.72	5.7	0.61	0.65	0.31	0.36	0.17	0.19	0.11	0.13	2.38	2.91	5.81	6.17	0.67	0.76	0.36	0.49	0.18	0.26	0.12	0.17	2.26	2.14	5.65	5.34	0.56	0.57	0.27	0.26	0.16	0.14	0.11	0.1
CascadeStereo	office2	3.15	0.55	11.75	0.65	0.75	0.5	0.37	0.13	0.12	0	0.06	0	1.98	0.59	9.29	0.72	0.61	0.53	0.32	0.18	0.04	0	0.02	0	3.57	0.53	12.52	0.63	0.8	0.49	0.38	0.11	0.15	0	0.07	0
CascadeStereo	sleeping_room_1_15	6.78	0.81	23.13	1.05	0.69	0.6	0.47	0.31	0.25	0.06	0.14	0	6.92	0.91	23.72	1.18	0.68	0.65	0.44	0.34	0.23	0.09	0.14	0	6.67	0.73	22.66	0.93	0.71	0.57	0.5	0.29	0.27	0.03	0.14	0
CascadeStereo	sleeping_room_1_3	0.64	1.08	0.79	3.65	0.55	0.57	0.19	0.29	0.01	0.1	0	0.02	0.74	1.38	0.93	5.45	0.62	0.6	0.29	0.3	0.02	0.08	0	0.04	0.61	0.98	0.74	2.82	0.53	0.56	0.15	0.28	0.01	0.1	0	0.02
CascadeStereo	sleeping_room_1_7	0.58	0.85	0.81	1.26	0.47	0.57	0.14	0.25	0.02	0.09	0	0.02	0.64	1	0.95	1.58	0.49	0.59	0.15	0.29	0.04	0.11	0.01	0.05	0.56	0.78	0.74	1.08	0.46	0.56	0.13	0.23	0.02	0.07	0	0.01
CascadeStereo	spaceStation2	7.06	6.26	9.7	9.33	0.82	0.81	0.71	0.7	0.67	0.61	0.65	0.59	4.15	4.3	7.36	9.07	0.63	0.62	0.42	0.43	0.35	0.34	0.33	0.33	8.54	7.25	10.7	9.46	0.92	0.91	0.86	0.84	0.84	0.75	0.81	0.73
CascadeStereo	stack_circles4	30.24	1.56	49.61	3.1	0.83	0.75	0.66	0.37	0.57	0.13	0.55	0.07	18.15	2.36	39.94	4.34	0.78	0.79	0.54	0.51	0.39	0.25	0.36	0.14	36.97	1.12	54.25	2.11	0.85	0.73	0.73	0.3	0.67	0.07	0.66	0.04
CascadeStereo	stack_circles9	17.57	1.46	36.24	2.94	0.8	0.7	0.62	0.36	0.52	0.13	0.47	0.07	9.15	1.99	25.12	3.91	0.71	0.66	0.47	0.4	0.36	0.2	0.32	0.13	22.87	1.13	41.75	2.12	0.86	0.73	0.72	0.33	0.62	0.09	0.56	0.03
CascadeStereo	time_travellers_10	36.86	10.82	49.28	22.55	0.76	0.76	0.65	0.49	0.59	0.31	0.58	0.25	27.65	15.71	41.53	27.79	0.74	0.79	0.57	0.57	0.49	0.4	0.46	0.35	40.62	8.82	52.1	20.02	0.77	0.75	0.68	0.45	0.63	0.28	0.63	0.21
CascadeStereo	time_travellers_13	11.11	1.62	17.44	3.53	0.8	0.67	0.69	0.39	0.63	0.13	0.6	0.08	8.01	2.56	15.51	5.16	0.71	0.7	0.56	0.47	0.46	0.23	0.44	0.16	13.24	0.97	18.65	1.64	0.86	0.65	0.78	0.34	0.74	0.06	0.71	0.03
CascadeStereo	time_travellers_15	21	2.99	33.67	7.93	0.86	0.59	0.69	0.4	0.58	0.14	0.57	0.11	14.85	5.33	30.38	11.03	0.77	0.75	0.55	0.54	0.43	0.29	0.41	0.22	24.56	1.63	35.43	5.4	0.92	0.5	0.76	0.32	0.66	0.06	0.66	0.04
CascadeStereo	time_travellers_2	7.54	3.13	14.9	6.83	0.8	0.59	0.59	0.37	0.51	0.21	0.48	0.17	7.03	4.36	19.32	8.2	0.73	0.72	0.49	0.52	0.37	0.32	0.35	0.25	7.91	2.25	10.64	5.65	0.86	0.49	0.67	0.26	0.6	0.12	0.57	0.11
CascadeStereo	time_travellers_20	11.94	0.99	26.33	2.05	0.82	0.59	0.71	0.27	0.62	0.06	0.52	0.03	8.3	1.62	20.41	3.25	0.73	0.64	0.57	0.38	0.48	0.15	0.41	0.09	13.8	0.67	28.89	0.95	0.87	0.56	0.78	0.21	0.7	0.01	0.58	0
CascadeStereo	time_travellers_24	45.89	10.42	54.47	24.32	0.85	0.85	0.79	0.45	0.76	0.23	0.74	0.19	32.13	14.08	46.29	27.8	0.72	0.82	0.6	0.56	0.55	0.37	0.52	0.31	50.57	9.18	56.98	23.02	0.89	0.86	0.85	0.41	0.83	0.18	0.81	0.16
CascadeStereo	time_travellers_25	12.46	4.46	20.62	11.11	0.81	0.65	0.59	0.43	0.51	0.2	0.49	0.15	11.15	6.6	20.85	13.8	0.81	0.75	0.58	0.55	0.44	0.33	0.4	0.25	13.33	3.03	20.46	8.89	0.8	0.58	0.6	0.35	0.56	0.11	0.56	0.09
CascadeStereo	time_travellers_3	14.42	6.88	20.61	14.29	0.82	0.61	0.66	0.43	0.59	0.28	0.58	0.24	11.05	6.62	18.81	13.33	0.77	0.75	0.57	0.55	0.46	0.34	0.44	0.27	16.94	7.08	21.84	14.96	0.86	0.5	0.73	0.35	0.69	0.23	0.69	0.21
CascadeStereo	twirls2	1.05	0.81	1.71	1.12	0.6	0.6	0.27	0.27	0.13	0.06	0.04	0.01	1.21	0.97	1.94	1.36	0.64	0.66	0.35	0.36	0.17	0.09	0.06	0.02	0.94	0.7	1.55	0.94	0.57	0.56	0.22	0.22	0.11	0.04	0.04	0
CascadeStereo	twirls3	0.99	0.74	1.9	0.99	0.58	0.6	0.29	0.24	0.12	0.04	0.03	0.01	1.13	0.95	2.59	1.32	0.58	0.66	0.29	0.34	0.15	0.09	0.04	0.02	0.91	0.64	1.43	0.78	0.58	0.57	0.29	0.2	0.11	0.01	0.02	0
CascadeStereo	voronoid_sphere6	3.74	7	8.04	13.04	0.69	0.8	0.49	0.55	0.27	0.38	0.17	0.29	4.36	9.47	8.96	15.47	0.7	0.83	0.51	0.67	0.31	0.5	0.2	0.39	2.71	2.85	6.18	7.3	0.67	0.74	0.45	0.35	0.22	0.18	0.13	0.11
CascadeStereo	voronoid_sphere9	3.37	4.06	7.35	6.31	0.73	0.74	0.45	0.58	0.32	0.45	0.26	0.37	2.65	4.06	7.09	6.51	0.7	0.71	0.39	0.54	0.24	0.4	0.18	0.34	7.57	4.05	8.71	5.02	0.91	0.87	0.84	0.8	0.79	0.72	0.75	0.54
CascadeStereo	walker4	7.82	2.58	10.33	4.16	0.88	0.71	0.78	0.52	0.72	0.33	0.67	0.22	6.27	3.07	9.69	4.9	0.75	0.71	0.58	0.52	0.51	0.36	0.49	0.28	8.79	2.27	10.72	3.62	0.95	0.7	0.89	0.52	0.84	0.32	0.79	0.18
CascadeStereo	windmills4	1.07	1.32	2.82	3.2	0.54	0.65	0.26	0.33	0.08	0.16	0.04	0.06	1.86	2.02	5.14	5.3	0.62	0.69	0.36	0.48	0.17	0.23	0.09	0.11	0.85	1.13	1.69	2.3	0.52	0.63	0.23	0.29	0.05	0.14	0.02	0.04
CascadeStereo	youngster_room10	6.38	0.73	21.86	1.04	0.63	0.58	0.37	0.23	0.21	0.04	0.13	0.01	4.4	0.94	17.34	1.43	0.73	0.64	0.48	0.32	0.23	0.08	0.11	0.02	7.34	0.64	23.73	0.79	0.59	0.54	0.31	0.18	0.2	0.02	0.13	0
CascadeStereo	youngster_room14	3.14	1.1	4.84	1.93	0.77	0.6	0.55	0.31	0.43	0.13	0.29	0.05	2.64	1.37	4.63	2.54	0.65	0.59	0.46	0.32	0.32	0.17	0.21	0.1	3.41	0.95	4.95	1.5	0.83	0.6	0.6	0.31	0.48	0.11	0.33	0.02
CascadeStereo	youngster_room4	1.59	0.64	8.75	0.8	0.61	0.57	0.24	0.18	0.07	0.01	0.02	0	2.87	0.73	13.43	0.97	0.62	0.56	0.33	0.25	0.12	0.04	0.05	0	0.95	0.6	4.95	0.7	0.61	0.57	0.2	0.14	0.04	0	0	0
CascadeStereo	youngster_room7	1.17	0.95	2.01	1.55	0.69	0.67	0.34	0.28	0.11	0.06	0.04	0.02	1.23	1.05	2.14	1.83	0.64	0.59	0.35	0.32	0.14	0.1	0.05	0.03	1.14	0.9	1.94	1.39	0.72	0.72	0.34	0.27	0.09	0.04	0.04	0.02
CascadeStereo	youngster_room9	3	0.7	11.37	0.89	0.64	0.62	0.31	0.23	0.1	0.02	0.06	0	2.26	0.76	10.17	1.09	0.59	0.55	0.3	0.26	0.1	0.05	0.03	0.01	3.32	0.68	11.84	0.79	0.67	0.65	0.32	0.21	0.1	0.01	0.07	0
CascadeStereo	dining_room_1_13	1.65	0.96	2.64	1.6	0.72	0.62	0.48	0.32	0.27	0.09	0.1	0.02	1.45	1.25	2.32	2.02	0.71	0.72	0.47	0.45	0.22	0.15	0.06	0.03	1.78	0.79	2.82	1.27	0.72	0.57	0.49	0.25	0.3	0.05	0.12	0.01
CascadeStereo	living_room_3_2	1.34	0.66	5.73	1	0.57	0.49	0.25	0.21	0.08	0.03	0.03	0.01	1.9	1.15	7.08	1.69	0.78	0.74	0.36	0.45	0.1	0.11	0.06	0.04	1.18	0.52	5.28	0.68	0.51	0.42	0.22	0.14	0.07	0.01	0.02	0
CascadeStereo	office_top4	5.32	0.62	21.29	0.77	0.54	0.56	0.22	0.18	0.1	0.01	0.07	0	4.37	0.65	19.54	0.81	0.49	0.53	0.2	0.23	0.06	0	0.05	0	5.75	0.61	22.03	0.76	0.56	0.57	0.23	0.16	0.12	0.01	0.08	0
CascadeStereo	sleeping_room_1_13	7.3	0.81	25.37	1.18	0.59	0.55	0.31	0.27	0.2	0.07	0.14	0.01	5.64	0.88	22.34	1.37	0.55	0.55	0.29	0.27	0.16	0.1	0.1	0.03	7.88	0.78	26.34	1.1	0.6	0.55	0.31	0.27	0.21	0.06	0.15	0.01
CascadeStereo	dining_room_1_5	1.01	1.3	1.65	2.4	0.62	0.7	0.32	0.43	0.11	0.16	0.03	0.05	1.22	1.54	2.08	3.05	0.65	0.73	0.38	0.49	0.14	0.2	0.05	0.07	0.8	1.07	1.08	1.53	0.59	0.67	0.27	0.38	0.07	0.13	0	0.03
CascadeStereo	dining_room_1_7	4.15	3.37	7.91	7.26	0.78	0.68	0.57	0.46	0.34	0.25	0.21	0.16	4.53	4.62	8.61	8.7	0.79	0.8	0.57	0.62	0.35	0.35	0.22	0.23	3.72	1.93	7.01	5.11	0.77	0.54	0.56	0.29	0.33	0.12	0.2	0.08
CascadeStereo	dining_room_1_9	0.73	0.87	1.07	1.31	0.59	0.61	0.22	0.26	0.03	0.08	0.01	0.02	0.81	1.04	1.28	1.61	0.59	0.61	0.25	0.35	0.05	0.13	0.01	0.03	0.65	0.69	0.77	0.89	0.6	0.62	0.18	0.15	0.01	0.03	0	0.01
CascadeStereo	floating_cubes1	2.99	1.91	3.85	2.62	0.77	0.72	0.64	0.53	0.56	0.38	0.42	0.17	2.96	2.03	3.92	2.83	0.77	0.72	0.61	0.53	0.52	0.37	0.4	0.21	3.01	1.83	3.79	2.46	0.77	0.72	0.66	0.54	0.58	0.39	0.43	0.13
CascadeStereo	fruit1	0.98	0.77	1.43	1.08	0.6	0.58	0.3	0.21	0.13	0.06	0.03	0.01	1.09	0.89	1.5	1.27	0.65	0.61	0.38	0.28	0.15	0.09	0.02	0.03	0.93	0.7	1.38	0.96	0.57	0.56	0.26	0.17	0.11	0.05	0.03	0
CascadeStereo	fruit6	1.32	1.21	2.45	2.28	0.58	0.64	0.29	0.34	0.15	0.1	0.11	0.06	1.79	1.9	3.13	3.35	0.65	0.72	0.38	0.46	0.24	0.23	0.16	0.14	1.13	0.93	2.12	1.65	0.55	0.6	0.25	0.29	0.12	0.05	0.09	0.03
CascadeStereo	fruit8	1.05	0.77	1.66	0.98	0.65	0.64	0.34	0.25	0.12	0.03	0.02	0	1.17	0.92	1.91	1.23	0.66	0.66	0.37	0.34	0.15	0.08	0.03	0.01	0.99	0.7	1.53	0.84	0.65	0.64	0.33	0.21	0.1	0.01	0.01	0
CascadeStereo	hacienda1	0.9	0.76	1.26	1.07	0.61	0.56	0.28	0.21	0.12	0.07	0.01	0	0.98	0.87	1.36	1.22	0.67	0.64	0.31	0.25	0.12	0.09	0.01	0.01	0.82	0.63	1.14	0.89	0.54	0.47	0.25	0.17	0.12	0.05	0	0
CascadeStereo	hacienda4	0.71	0.94	0.95	2.89	0.58	0.55	0.23	0.17	0.04	0.02	0	0.02	0.76	0.85	1.02	2.12	0.61	0.59	0.26	0.2	0.04	0.02	0	0.01	0.66	1.05	0.85	3.57	0.54	0.5	0.2	0.12	0.04	0.03	0	0.03
CascadeStereo	hacienda8	5.17	16.94	21.17	46.36	0.43	0.45	0.13	0.2	0.07	0.15	0.06	0.15	4.54	9.23	19.81	32.73	0.46	0.44	0.18	0.19	0.06	0.08	0.05	0.08	5.41	19.81	21.66	50.52	0.41	0.45	0.11	0.21	0.07	0.17	0.07	0.17
CascadeStereo	landscape1_5	0.95	1.41	2.76	4.15	0.55	0.61	0.21	0.32	0.06	0.12	0.02	0.04	1.34	2.18	3.82	6.03	0.64	0.68	0.3	0.4	0.09	0.17	0.04	0.08	0.7	0.92	1.77	2.19	0.49	0.56	0.16	0.27	0.04	0.08	0.01	0.02
CascadeStereo	landscape1_6	0.63	0.92	1.18	1.89	0.48	0.6	0.14	0.26	0.02	0.06	0.01	0.02	0.73	1.2	1.59	2.6	0.48	0.63	0.18	0.31	0.04	0.11	0.02	0.04	0.54	0.68	0.68	0.96	0.47	0.57	0.11	0.21	0.01	0.02	0	0
CascadeStereo	landscape3_2	7.72	3.37	23.91	10.01	0.6	0.63	0.3	0.38	0.21	0.25	0.18	0.18	4.53	2.44	19.07	6.86	0.6	0.65	0.28	0.39	0.16	0.23	0.11	0.12	10	4.03	26.85	11.76	0.59	0.62	0.31	0.37	0.25	0.27	0.24	0.23
CascadeStereo	landscape5_2	37.07	0.76	63.15	1.01	0.74	0.59	0.53	0.27	0.42	0.07	0.41	0	26.8	0.79	59.38	1	0.65	0.62	0.4	0.33	0.23	0.05	0.21	0	39.2	0.76	63.9	1.01	0.76	0.58	0.55	0.25	0.47	0.07	0.45	0
CascadeStereo	living_room_1_1	1.35	0.73	5.88	0.99	0.62	0.54	0.29	0.22	0.11	0.06	0.02	0	1.74	0.89	7.5	1.21	0.59	0.61	0.32	0.31	0.18	0.1	0.03	0.01	0.91	0.55	3.11	0.67	0.67	0.48	0.26	0.11	0.03	0.01	0	0
CascadeStereo	living_room_2_3	0.7	0.8	0.9	1.14	0.6	0.58	0.2	0.25	0.04	0.09	0	0.01	0.91	0.9	1.15	1.11	0.7	0.72	0.31	0.32	0.09	0.08	0	0	0.65	0.78	0.82	1.15	0.57	0.54	0.18	0.23	0.02	0.09	0	0.01
CascadeStereoStage2	abstract_bowls_1	1.16	0.97	2.57	1.6	0.68	0.68	0.39	0.31	0.13	0.06	0.04	0.02	1.19	1.13	3.36	2.09	0.64	0.66	0.33	0.33	0.12	0.1	0.04	0.05	1.14	0.82	1.59	0.98	0.71	0.71	0.43	0.31	0.14	0.03	0.03	0
CascadeStereoStage2	abstract_bowls_14	3.64	1.32	6.15	2.27	0.73	0.61	0.54	0.35	0.4	0.17	0.29	0.08	2.51	1.59	5.28	2.87	0.65	0.66	0.41	0.38	0.24	0.18	0.15	0.11	4.33	1.15	6.62	1.82	0.78	0.59	0.62	0.34	0.5	0.16	0.37	0.07
CascadeStereoStage2	bones_3	2.48	3.21	6.29	7.63	0.74	0.79	0.42	0.44	0.19	0.19	0.09	0.13	3.1	4.2	7.49	9.08	0.72	0.77	0.44	0.52	0.21	0.26	0.13	0.18	1.14	1.05	1.77	2.23	0.79	0.82	0.37	0.28	0.13	0.04	0.02	0.02
CascadeStereoStage2	bones_6	3.21	4.6	7.86	9.95	0.72	0.76	0.47	0.51	0.23	0.3	0.13	0.19	3.55	5.08	8.51	10.67	0.71	0.75	0.48	0.53	0.25	0.32	0.15	0.21	1.93	2.8	4.68	6.64	0.76	0.78	0.43	0.44	0.18	0.21	0.07	0.11
CascadeStereoStage2	Chairs4	1.45	2.38	2.49	3.73	0.63	0.79	0.38	0.59	0.2	0.34	0.09	0.19	1.58	2.33	2.65	3.73	0.65	0.77	0.41	0.57	0.23	0.32	0.1	0.18	1.04	2.52	1.88	3.7	0.57	0.84	0.28	0.65	0.12	0.39	0.04	0.21
CascadeStereoStage2	chess_8	1.59	0.85	2.95	1.4	0.57	0.61	0.29	0.26	0.19	0.05	0.14	0.02	1.53	0.99	2.85	1.75	0.58	0.61	0.29	0.27	0.18	0.08	0.13	0.04	1.65	0.71	3.04	0.95	0.57	0.61	0.29	0.24	0.2	0.02	0.16	0
CascadeStereoStage2	childroom_1	0.94	1.14	1.65	2.2	0.58	0.65	0.24	0.31	0.1	0.08	0.04	0.05	1.07	1.26	1.95	2.47	0.58	0.63	0.27	0.34	0.12	0.11	0.05	0.05	0.85	1.06	1.4	1.99	0.58	0.66	0.22	0.29	0.08	0.06	0.02	0.04
CascadeStereoStage2	childroom_12	4.83	2.02	10.04	5.32	0.66	0.59	0.45	0.33	0.31	0.16	0.25	0.1	8.2	3.37	13.94	7.45	0.78	0.68	0.61	0.46	0.47	0.28	0.4	0.18	1.49	0.69	2.91	1.13	0.55	0.5	0.3	0.2	0.16	0.03	0.11	0.02
CascadeStereoStage2	childroom_2	1.85	1.98	5.19	5.59	0.69	0.69	0.4	0.4	0.18	0.15	0.08	0.08	1.9	2.83	4.75	7.58	0.69	0.71	0.44	0.46	0.21	0.23	0.09	0.13	1.8	1.2	5.57	2.66	0.69	0.68	0.36	0.34	0.16	0.09	0.07	0.04
CascadeStereoStage2	childroom_4	0.57	0.68	0.9	0.99	0.49	0.55	0.12	0.22	0.01	0.02	0	0	0.68	0.84	1.1	1.24	0.58	0.67	0.17	0.3	0.01	0.04	0	0.01	0.46	0.51	0.62	0.64	0.39	0.44	0.07	0.13	0	0	0	0
CascadeStereoStage2	childroom_6	0.77	0.75	1.19	1.17	0.57	0.56	0.2	0.21	0.06	0.04	0.01	0.01	0.87	0.93	1.39	1.52	0.6	0.62	0.26	0.28	0.08	0.08	0.02	0.02	0.68	0.59	0.98	0.74	0.55	0.5	0.15	0.15	0.04	0.01	0.01	0
CascadeStereoStage2	childroom_9	0.97	1.04	1.65	2.01	0.57	0.59	0.31	0.32	0.12	0.11	0.03	0.03	1.12	1.45	2.12	2.9	0.65	0.69	0.32	0.37	0.12	0.15	0.04	0.07	0.89	0.81	1.3	1.23	0.52	0.54	0.3	0.29	0.13	0.09	0.02	0
CascadeStereoStage2	cloth4	1.06	0.91	2.97	3.43	0.54	0.48	0.25	0.2	0.09	0.03	0.04	0.01	1.64	1.46	5.51	5.46	0.6	0.57	0.35	0.28	0.11	0.04	0.05	0.03	0.9	0.77	1.76	2.64	0.52	0.46	0.23	0.17	0.08	0.03	0.04	0.01
CascadeStereoStage2	cloth6	0.87	0.67	1.47	0.86	0.58	0.56	0.25	0.23	0.07	0.02	0.03	0	1.04	0.77	1.8	1.03	0.57	0.58	0.31	0.28	0.12	0.05	0.04	0	0.79	0.62	1.27	0.76	0.58	0.56	0.23	0.2	0.05	0	0.02	0
CascadeStereoStage2	cloth7	5.77	1.34	12.13	2.59	0.69	0.66	0.49	0.32	0.37	0.13	0.3	0.06	3.31	1.71	9.03	3.21	0.66	0.7	0.37	0.4	0.23	0.18	0.17	0.1	7.85	1.02	14.23	1.9	0.72	0.62	0.58	0.24	0.49	0.09	0.41	0.04
CascadeStereoStage2	coral6	1.27	1.19	2.3	2.14	0.64	0.65	0.35	0.34	0.15	0.11	0.07	0.06	1.77	1.78	2.96	2.99	0.74	0.71	0.48	0.46	0.24	0.23	0.11	0.12	0.97	0.83	1.77	1.36	0.57	0.62	0.27	0.26	0.09	0.03	0.04	0.02
CascadeStereoStage2	dining_room_1_1	2.72	3.88	6.91	8.87	0.63	0.72	0.4	0.49	0.22	0.3	0.14	0.2	3.69	5.41	8.38	11.01	0.72	0.79	0.5	0.59	0.3	0.4	0.2	0.29	1.35	1.72	3.97	4.24	0.48	0.61	0.25	0.35	0.11	0.15	0.06	0.08
CascadeStereoStage2	office_top5	0.71	0.71	0.95	0.95	0.57	0.59	0.25	0.2	0.03	0.02	0	0.01	0.8	0.92	1.13	1.29	0.59	0.67	0.3	0.33	0.05	0.06	0.01	0.02	0.66	0.6	0.83	0.72	0.56	0.55	0.22	0.14	0.01	0	0	0
CascadeStereoStage2	park1	0.63	0.66	0.84	0.89	0.52	0.54	0.16	0.18	0.02	0.02	0	0	0.79	0.83	1.05	1.1	0.62	0.65	0.28	0.3	0.04	0.05	0.01	0.01	0.46	0.47	0.55	0.58	0.42	0.44	0.04	0.06	0	0	0	0
CascadeStereoStage2	park10	1.13	1.54	2.13	2.74	0.61	0.73	0.31	0.46	0.11	0.18	0.05	0.08	1.36	1.91	2.57	3.33	0.63	0.73	0.35	0.5	0.15	0.26	0.08	0.12	0.71	0.87	0.88	1.03	0.59	0.72	0.24	0.39	0.03	0.02	0	0
CascadeStereoStage2	park6	1.2	1.98	3.17	5.47	0.61	0.63	0.33	0.34	0.09	0.12	0.03	0.08	2.11	4.43	5.3	9.31	0.67	0.73	0.41	0.48	0.2	0.3	0.09	0.22	0.73	0.74	0.94	1.05	0.57	0.58	0.29	0.27	0.03	0.03	0	0
CascadeStereoStage2	person1_1	27.35	1.43	47.18	4.45	0.72	0.63	0.6	0.2	0.52	0.05	0.49	0.04	14.06	2.96	30.71	7.39	0.66	0.62	0.49	0.33	0.35	0.16	0.32	0.12	31.56	0.95	51.31	2.98	0.74	0.63	0.63	0.15	0.57	0.02	0.54	0.01
CascadeStereoStage2	person1_3	1.69	3.42	5.46	12.14	0.72	0.8	0.37	0.48	0.12	0.16	0.05	0.07	2.5	4.46	7.35	14.12	0.71	0.79	0.46	0.49	0.22	0.22	0.1	0.12	1.26	2.86	4.11	10.93	0.72	0.81	0.33	0.47	0.06	0.12	0.02	0.04
CascadeStereoStage2	person1_8	14.61	2.83	32.44	8.1	0.67	0.74	0.49	0.41	0.36	0.19	0.33	0.15	13.5	5.03	32.47	14.46	0.57	0.68	0.39	0.42	0.32	0.27	0.29	0.21	14.88	2.29	32.43	5.54	0.7	0.75	0.52	0.4	0.37	0.17	0.34	0.14
CascadeStereoStage2	person2_5	1.53	0.9	4.93	1.33	0.66	0.67	0.33	0.3	0.12	0.06	0.07	0.02	1.69	1.11	5.74	1.77	0.64	0.67	0.34	0.34	0.14	0.12	0.08	0.05	1.44	0.78	4.42	0.99	0.68	0.66	0.33	0.28	0.11	0.02	0.06	0.01
CascadeStereoStage2	person3_10	1.67	1.42	5.66	2.69	0.59	0.68	0.32	0.41	0.12	0.14	0.05	0.07	3.05	2.06	9.55	3.79	0.65	0.7	0.42	0.44	0.2	0.26	0.11	0.15	1.16	1.19	3.22	2.16	0.57	0.67	0.28	0.4	0.09	0.1	0.03	0.04
CascadeStereoStage2	person3_3	2.91	1.09	8.85	2.32	0.72	0.66	0.48	0.32	0.25	0.07	0.17	0.03	4.26	1.92	13.38	4.08	0.64	0.67	0.44	0.41	0.25	0.2	0.17	0.09	2.46	0.82	6.66	1.26	0.75	0.66	0.49	0.29	0.25	0.03	0.16	0.01
CascadeStereoStage2	person3_4	2.02	2.13	5.43	5.16	0.65	0.7	0.34	0.42	0.12	0.17	0.07	0.07	2.67	3.15	6.67	6.83	0.62	0.71	0.35	0.45	0.18	0.24	0.11	0.14	1.64	1.55	4.57	3.91	0.66	0.69	0.33	0.4	0.09	0.12	0.05	0.03
CascadeStereoStage2	plant_vintage12	1.99	1.45	3.97	3.05	0.61	0.67	0.33	0.32	0.2	0.13	0.14	0.07	1.88	1.89	3.8	3.75	0.63	0.71	0.35	0.44	0.19	0.19	0.12	0.1	2.2	0.66	4.27	0.9	0.58	0.61	0.29	0.13	0.22	0.01	0.18	0
CascadeStereoStage2	plant_vintage14	3.79	0.6	17.95	0.75	0.55	0.54	0.26	0.13	0.07	0.01	0.05	0	3.41	0.74	17.18	0.93	0.62	0.64	0.28	0.22	0.07	0.03	0.04	0	3.95	0.54	18.26	0.66	0.52	0.49	0.26	0.09	0.07	0	0.05	0
CascadeStereoStage2	plant_vintage15	1.33	0.62	6.26	0.75	0.52	0.58	0.21	0.15	0.07	0.01	0.02	0	1.12	0.75	4.5	0.9	0.6	0.68	0.26	0.24	0.07	0.02	0.01	0	1.43	0.56	6.9	0.67	0.49	0.54	0.18	0.11	0.06	0	0.02	0
CascadeStereoStage2	plant_vintage2	1.53	0.61	8.08	0.87	0.52	0.47	0.2	0.17	0.05	0.03	0.02	0	1.82	0.64	10.12	0.92	0.53	0.48	0.25	0.2	0.05	0.02	0.02	0.01	1.36	0.6	6.64	0.85	0.52	0.46	0.18	0.15	0.04	0.03	0.02	0
CascadeStereoStage2	plant_vintage4	5.18	0.61	21.69	0.77	0.55	0.56	0.23	0.12	0.1	0.01	0.06	0	3.37	0.64	17.17	0.91	0.43	0.48	0.22	0.19	0.08	0.04	0.04	0.01	6.27	0.6	23.99	0.67	0.62	0.61	0.23	0.08	0.11	0	0.08	0
CascadeStereoStage2	plant_vintage7	1.01	1.17	1.86	2.29	0.63	0.67	0.25	0.27	0.08	0.1	0.04	0.06	1.21	1.55	2.37	3.01	0.56	0.63	0.26	0.35	0.12	0.16	0.08	0.1	0.78	0.72	0.95	0.85	0.71	0.73	0.24	0.18	0.03	0.01	0	0
CascadeStereoStage2	roundntwist4	1.14	0.91	1.65	1.67	0.63	0.56	0.39	0.27	0.19	0.1	0.03	0.02	1.06	1.04	1.57	1.87	0.6	0.62	0.37	0.33	0.17	0.13	0.03	0.02	1.26	0.72	1.75	1.31	0.67	0.47	0.44	0.17	0.22	0.05	0.04	0.02
CascadeStereoStage2	ScifiKnot1	1.37	1.25	4.09	2.03	0.58	0.68	0.31	0.37	0.14	0.12	0.08	0.08	1.94	1.55	6.18	2.54	0.65	0.69	0.41	0.41	0.22	0.18	0.13	0.12	1.02	1.06	1.9	1.64	0.54	0.67	0.26	0.35	0.1	0.09	0.05	0.06
CascadeStereoStage2	ScifiKnot4	2.55	1.65	4.12	3.46	0.76	0.61	0.6	0.38	0.41	0.18	0.19	0.09	3.41	3.3	5.52	5.78	0.82	0.79	0.66	0.6	0.48	0.39	0.25	0.23	2.26	1.09	3.51	2.15	0.74	0.55	0.57	0.3	0.38	0.1	0.18	0.05
CascadeStereoStage2	sleeping_room_1_11	0.74	0.73	0.98	0.95	0.61	0.62	0.25	0.28	0.03	0.01	0	0	0.84	0.8	1.17	1.21	0.61	0.6	0.31	0.28	0.06	0.04	0.01	0.01	0.7	0.71	0.9	0.84	0.61	0.63	0.23	0.28	0.02	0	0	0
CascadeStereoStage2	living_room_3_5	1.36	1.6	3.02	2.82	0.61	0.72	0.28	0.48	0.12	0.19	0.07	0.08	1.39	2.16	3.2	3.6	0.64	0.77	0.3	0.55	0.13	0.28	0.07	0.15	1.34	1.11	2.85	1.86	0.59	0.67	0.27	0.42	0.12	0.1	0.07	0.03
CascadeStereoStage2	living_room_3_9	0.73	0.78	0.99	1.05	0.56	0.63	0.23	0.24	0.06	0.05	0	0.01	0.77	0.9	1.11	1.31	0.56	0.61	0.25	0.32	0.07	0.08	0	0.02	0.72	0.72	0.93	0.9	0.56	0.64	0.22	0.21	0.05	0.03	0	0
CascadeStereoStage2	mannequins_10	3.14	9.14	8.07	19.18	0.73	0.71	0.45	0.48	0.26	0.33	0.15	0.26	3.87	12.54	9.61	23.1	0.76	0.77	0.52	0.59	0.31	0.44	0.18	0.35	1.87	3.22	4.2	8.84	0.69	0.6	0.33	0.3	0.17	0.14	0.1	0.12
CascadeStereoStage2	mannequins_12	6.38	2.31	12.88	4.9	0.79	0.68	0.55	0.4	0.43	0.19	0.38	0.14	4.94	3.22	10.86	6.09	0.74	0.76	0.46	0.51	0.33	0.29	0.28	0.21	7.78	1.42	14.59	3.35	0.84	0.6	0.64	0.3	0.54	0.09	0.48	0.07
CascadeStereoStage2	mannequins_2	3.07	1.93	5.99	4.68	0.7	0.65	0.48	0.38	0.31	0.17	0.22	0.09	2.65	2.49	5.96	5.61	0.68	0.69	0.43	0.45	0.23	0.23	0.16	0.13	3.91	0.83	6.04	1.78	0.73	0.57	0.59	0.25	0.47	0.05	0.33	0.02
CascadeStereoStage2	mannequins_5	0.98	1.11	1.45	1.77	0.65	0.63	0.36	0.35	0.08	0.14	0.03	0.04	1.02	1.14	1.62	1.89	0.63	0.62	0.33	0.35	0.1	0.13	0.04	0.04	0.92	1.07	1.17	1.59	0.68	0.64	0.4	0.34	0.05	0.16	0.01	0.03
CascadeStereoStage2	mannequins_9	1.41	1.72	2.32	3.83	0.68	0.63	0.38	0.36	0.2	0.16	0.08	0.08	1.28	2.09	2.17	4.39	0.67	0.68	0.38	0.42	0.17	0.2	0.05	0.11	1.68	0.9	2.63	2.09	0.69	0.51	0.38	0.22	0.24	0.05	0.17	0.03
CascadeStereoStage2	Minicubes4	3.4	3.06	5.77	5.36	0.72	0.66	0.52	0.44	0.34	0.31	0.27	0.26	3.05	2.87	5.47	5.23	0.69	0.69	0.48	0.44	0.31	0.29	0.23	0.22	4.06	3.41	6.3	5.59	0.77	0.61	0.6	0.43	0.4	0.36	0.34	0.33
CascadeStereoStage2	Minicubes5	3.08	2.81	5.14	5.25	0.7	0.68	0.5	0.45	0.36	0.31	0.27	0.26	2.47	2.31	4.5	5.04	0.68	0.65	0.46	0.41	0.3	0.25	0.2	0.18	3.96	3.53	5.94	5.55	0.74	0.73	0.56	0.5	0.44	0.4	0.38	0.36
CascadeStereoStage2	Minicubes9	3.16	1.11	10.41	1.84	0.72	0.68	0.53	0.36	0.33	0.1	0.15	0.04	2.32	1.26	8.7	2.24	0.65	0.63	0.44	0.34	0.23	0.14	0.11	0.07	4.22	0.91	12.25	1.16	0.81	0.74	0.65	0.37	0.46	0.04	0.2	0.01
CascadeStereoStage2	moto3	0.88	1.17	1.24	1.74	0.61	0.67	0.28	0.35	0.09	0.16	0.02	0.07	1.12	1.38	1.53	2	0.72	0.73	0.38	0.42	0.15	0.21	0.03	0.09	0.68	1	0.93	1.51	0.51	0.62	0.19	0.3	0.04	0.12	0	0.04
CascadeStereoStage2	music1_1	2.35	1.84	5.69	4.34	0.66	0.68	0.36	0.36	0.19	0.14	0.11	0.09	2.7	2.28	6.99	5.52	0.61	0.69	0.34	0.39	0.18	0.18	0.12	0.11	2.17	1.62	4.92	3.61	0.68	0.67	0.37	0.35	0.19	0.12	0.1	0.08
CascadeStereoStage2	music1_6	1.73	2.33	3.42	5.21	0.71	0.71	0.4	0.4	0.2	0.2	0.11	0.12	2	3.22	3.97	6.45	0.7	0.75	0.44	0.52	0.24	0.29	0.12	0.19	1.35	1.01	2.38	2.41	0.72	0.64	0.33	0.22	0.13	0.06	0.08	0.03
CascadeStereoStage2	music1_7	1.09	0.74	2.29	1.02	0.6	0.6	0.26	0.22	0.12	0.04	0.05	0.01	1.37	1.01	2.89	1.48	0.64	0.65	0.37	0.33	0.18	0.12	0.07	0.03	0.97	0.62	1.97	0.74	0.58	0.57	0.21	0.18	0.09	0	0.05	0
CascadeStereoStage2	music1_9	10.95	1.46	25.28	2.84	0.73	0.61	0.6	0.39	0.51	0.18	0.38	0.07	7.99	2.21	19.65	4.47	0.6	0.56	0.41	0.4	0.31	0.27	0.24	0.13	11.78	1.26	26.64	2.18	0.77	0.63	0.65	0.38	0.56	0.15	0.42	0.05
CascadeStereoStage2	nest5	3.59	3.75	18.67	18.84	0.77	0.74	0.58	0.52	0.35	0.32	0.17	0.19	4.83	5.25	23.89	24.09	0.79	0.81	0.59	0.63	0.38	0.43	0.23	0.27	2.11	1.96	9.1	9.27	0.75	0.65	0.56	0.38	0.3	0.18	0.09	0.1
CascadeStereoStage2	office1	2.97	0.55	11.24	0.66	0.67	0.51	0.3	0.11	0.11	0	0.06	0	1.87	0.66	8.66	0.81	0.64	0.6	0.29	0.2	0.06	0.01	0.03	0	3.59	0.48	12.45	0.57	0.69	0.45	0.31	0.06	0.14	0	0.08	0
CascadeStereoStage2	office12	2.84	1.95	3.98	4.42	0.79	0.61	0.67	0.32	0.5	0.15	0.28	0.11	3.24	3.25	4.56	6.22	0.85	0.69	0.73	0.45	0.53	0.28	0.3	0.21	2.63	1.26	3.63	3.07	0.76	0.56	0.64	0.24	0.49	0.08	0.27	0.06
CascadeStereoStage2	office14	2.31	2.46	5.72	5.7	0.61	0.65	0.31	0.36	0.17	0.19	0.11	0.13	2.38	2.91	5.81	6.17	0.67	0.76	0.36	0.49	0.18	0.26	0.12	0.17	2.26	2.14	5.65	5.34	0.56	0.57	0.27	0.26	0.16	0.14	0.11	0.1
CascadeStereoStage2	office2	3.15	0.55	11.75	0.65	0.75	0.5	0.37	0.13	0.12	0	0.06	0	1.98	0.59	9.29	0.72	0.61	0.53	0.32	0.18	0.04	0	0.02	0	3.57	0.53	12.52	0.63	0.8	0.49	0.38	0.11	0.15	0	0.07	0
CascadeStereoStage2	sleeping_room_1_15	6.78	0.81	23.13	1.05	0.69	0.6	0.47	0.31	0.25	0.06	0.14	0	6.92	0.91	23.72	1.18	0.68	0.65	0.44	0.34	0.23	0.09	0.14	0	6.67	0.73	22.66	0.93	0.71	0.57	0.5	0.29	0.27	0.03	0.14	0
CascadeStereoStage2	sleeping_room_1_3	0.64	1.08	0.79	3.65	0.55	0.57	0.19	0.29	0.01	0.1	0	0.02	0.74	1.38	0.93	5.45	0.62	0.6	0.29	0.3	0.02	0.08	0	0.04	0.61	0.98	0.74	2.82	0.53	0.56	0.15	0.28	0.01	0.1	0	0.02
CascadeStereoStage2	sleeping_room_1_7	0.58	0.85	0.81	1.26	0.47	0.57	0.14	0.25	0.02	0.09	0	0.02	0.64	1	0.95	1.58	0.49	0.59	0.15	0.29	0.04	0.11	0.01	0.05	0.56	0.78	0.74	1.08	0.46	0.56	0.13	0.23	0.02	0.07	0	0.01
CascadeStereoStage2	spaceStation2	7.06	6.26	9.7	9.33	0.82	0.81	0.71	0.7	0.67	0.61	0.65	0.59	4.15	4.3	7.36	9.07	0.63	0.62	0.42	0.43	0.35	0.34	0.33	0.33	8.54	7.25	10.7	9.46	0.92	0.91	0.86	0.84	0.84	0.75	0.81	0.73
CascadeStereoStage2	stack_circles4	30.24	1.56	49.61	3.1	0.83	0.75	0.66	0.37	0.57	0.13	0.55	0.07	18.15	2.36	39.94	4.34	0.78	0.79	0.54	0.51	0.39	0.25	0.36	0.14	36.97	1.12	54.25	2.11	0.85	0.73	0.73	0.3	0.67	0.07	0.66	0.04
CascadeStereoStage2	stack_circles9	17.57	1.46	36.24	2.94	0.8	0.7	0.62	0.36	0.52	0.13	0.47	0.07	9.15	1.99	25.12	3.91	0.71	0.66	0.47	0.4	0.36	0.2	0.32	0.13	22.87	1.13	41.75	2.12	0.86	0.73	0.72	0.33	0.62	0.09	0.56	0.03
CascadeStereoStage2	time_travellers_10	36.86	10.82	49.28	22.55	0.76	0.76	0.65	0.49	0.59	0.31	0.58	0.25	27.65	15.71	41.53	27.79	0.74	0.79	0.57	0.57	0.49	0.4	0.46	0.35	40.62	8.82	52.1	20.02	0.77	0.75	0.68	0.45	0.63	0.28	0.63	0.21
CascadeStereoStage2	time_travellers_13	11.11	1.62	17.44	3.53	0.8	0.67	0.69	0.39	0.63	0.13	0.6	0.08	8.01	2.56	15.51	5.16	0.71	0.7	0.56	0.47	0.46	0.23	0.44	0.16	13.24	0.97	18.65	1.64	0.86	0.65	0.78	0.34	0.74	0.06	0.71	0.03
CascadeStereoStage2	time_travellers_15	21	2.99	33.67	7.93	0.86	0.59	0.69	0.4	0.58	0.14	0.57	0.11	14.85	5.33	30.38	11.03	0.77	0.75	0.55	0.54	0.43	0.29	0.41	0.22	24.56	1.63	35.43	5.4	0.92	0.5	0.76	0.32	0.66	0.06	0.66	0.04
CascadeStereoStage2	time_travellers_2	7.54	3.13	14.9	6.83	0.8	0.59	0.59	0.37	0.51	0.21	0.48	0.17	7.03	4.36	19.32	8.2	0.73	0.72	0.49	0.52	0.37	0.32	0.35	0.25	7.91	2.25	10.64	5.65	0.86	0.49	0.67	0.26	0.6	0.12	0.57	0.11
CascadeStereoStage2	time_travellers_20	11.94	0.99	26.33	2.05	0.82	0.59	0.71	0.27	0.62	0.06	0.52	0.03	8.3	1.62	20.41	3.25	0.73	0.64	0.57	0.38	0.48	0.15	0.41	0.09	13.8	0.67	28.89	0.95	0.87	0.56	0.78	0.21	0.7	0.01	0.58	0
CascadeStereoStage2	time_travellers_24	45.89	10.42	54.47	24.32	0.85	0.85	0.79	0.45	0.76	0.23	0.74	0.19	32.13	14.08	46.29	27.8	0.72	0.82	0.6	0.56	0.55	0.37	0.52	0.31	50.57	9.18	56.98	23.02	0.89	0.86	0.85	0.41	0.83	0.18	0.81	0.16
CascadeStereoStage2	time_travellers_25	12.46	4.46	20.62	11.11	0.81	0.65	0.59	0.43	0.51	0.2	0.49	0.15	11.15	6.6	20.85	13.8	0.81	0.75	0.58	0.55	0.44	0.33	0.4	0.25	13.33	3.03	20.46	8.89	0.8	0.58	0.6	0.35	0.56	0.11	0.56	0.09
CascadeStereoStage2	time_travellers_3	14.42	6.88	20.61	14.29	0.82	0.61	0.66	0.43	0.59	0.28	0.58	0.24	11.05	6.62	18.81	13.33	0.77	0.75	0.57	0.55	0.46	0.34	0.44	0.27	16.94	7.08	21.84	14.96	0.86	0.5	0.73	0.35	0.69	0.23	0.69	0.21
CascadeStereoStage2	twirls2	1.05	0.81	1.71	1.12	0.6	0.6	0.27	0.27	0.13	0.06	0.04	0.01	1.21	0.97	1.94	1.36	0.64	0.66	0.35	0.36	0.17	0.09	0.06	0.02	0.94	0.7	1.55	0.94	0.57	0.56	0.22	0.22	0.11	0.04	0.04	0
CascadeStereoStage2	twirls3	0.99	0.74	1.9	0.99	0.58	0.6	0.29	0.24	0.12	0.04	0.03	0.01	1.13	0.95	2.59	1.32	0.58	0.66	0.29	0.34	0.15	0.09	0.04	0.02	0.91	0.64	1.43	0.78	0.58	0.57	0.29	0.2	0.11	0.01	0.02	0
CascadeStereoStage2	voronoid_sphere6	3.74	7	8.04	13.04	0.69	0.8	0.49	0.55	0.27	0.38	0.17	0.29	4.36	9.47	8.96	15.47	0.7	0.83	0.51	0.67	0.31	0.5	0.2	0.39	2.71	2.85	6.18	7.3	0.67	0.74	0.45	0.35	0.22	0.18	0.13	0.11
CascadeStereoStage2	voronoid_sphere9	3.37	4.06	7.35	6.31	0.73	0.74	0.45	0.58	0.32	0.45	0.26	0.37	2.65	4.06	7.09	6.51	0.7	0.71	0.39	0.54	0.24	0.4	0.18	0.34	7.57	4.05	8.71	5.02	0.91	0.87	0.84	0.8	0.79	0.72	0.75	0.54
CascadeStereoStage2	walker4	7.82	2.58	10.33	4.16	0.88	0.71	0.78	0.52	0.72	0.33	0.67	0.22	6.27	3.07	9.69	4.9	0.75	0.71	0.58	0.52	0.51	0.36	0.49	0.28	8.79	2.27	10.72	3.62	0.95	0.7	0.89	0.52	0.84	0.32	0.79	0.18
CascadeStereoStage2	windmills4	1.07	1.32	2.82	3.2	0.54	0.65	0.26	0.33	0.08	0.16	0.04	0.06	1.86	2.02	5.14	5.3	0.62	0.69	0.36	0.48	0.17	0.23	0.09	0.11	0.85	1.13	1.69	2.3	0.52	0.63	0.23	0.29	0.05	0.14	0.02	0.04
CascadeStereoStage2	youngster_room10	6.38	0.73	21.86	1.04	0.63	0.58	0.37	0.23	0.21	0.04	0.13	0.01	4.4	0.94	17.34	1.43	0.73	0.64	0.48	0.32	0.23	0.08	0.11	0.02	7.34	0.64	23.73	0.79	0.59	0.54	0.31	0.18	0.2	0.02	0.13	0
CascadeStereoStage2	youngster_room14	3.14	1.1	4.84	1.93	0.77	0.6	0.55	0.31	0.43	0.13	0.29	0.05	2.64	1.37	4.63	2.54	0.65	0.59	0.46	0.32	0.32	0.17	0.21	0.1	3.41	0.95	4.95	1.5	0.83	0.6	0.6	0.31	0.48	0.11	0.33	0.02
CascadeStereoStage2	youngster_room4	1.59	0.64	8.75	0.8	0.61	0.57	0.24	0.18	0.07	0.01	0.02	0	2.87	0.73	13.43	0.97	0.62	0.56	0.33	0.25	0.12	0.04	0.05	0	0.95	0.6	4.95	0.7	0.61	0.57	0.2	0.14	0.04	0	0	0
CascadeStereoStage2	youngster_room7	1.17	0.95	2.01	1.55	0.69	0.67	0.34	0.28	0.11	0.06	0.04	0.02	1.23	1.05	2.14	1.83	0.64	0.59	0.35	0.32	0.14	0.1	0.05	0.03	1.14	0.9	1.94	1.39	0.72	0.72	0.34	0.27	0.09	0.04	0.04	0.02
CascadeStereoStage2	youngster_room9	3	0.7	11.37	0.89	0.64	0.62	0.31	0.23	0.1	0.02	0.06	0	2.26	0.76	10.17	1.09	0.59	0.55	0.3	0.26	0.1	0.05	0.03	0.01	3.32	0.68	11.84	0.79	0.67	0.65	0.32	0.21	0.1	0.01	0.07	0
CascadeStereoStage2	dining_room_1_13	1.65	0.96	2.64	1.6	0.72	0.62	0.48	0.32	0.27	0.09	0.1	0.02	1.45	1.25	2.32	2.02	0.71	0.72	0.47	0.45	0.22	0.15	0.06	0.03	1.78	0.79	2.82	1.27	0.72	0.57	0.49	0.25	0.3	0.05	0.12	0.01
CascadeStereoStage2	living_room_3_2	1.34	0.66	5.73	1	0.57	0.49	0.25	0.21	0.08	0.03	0.03	0.01	1.9	1.15	7.08	1.69	0.78	0.74	0.36	0.45	0.1	0.11	0.06	0.04	1.18	0.52	5.28	0.68	0.51	0.42	0.22	0.14	0.07	0.01	0.02	0
CascadeStereoStage2	office_top4	5.32	0.62	21.29	0.77	0.54	0.56	0.22	0.18	0.1	0.01	0.07	0	4.37	0.65	19.54	0.81	0.49	0.53	0.2	0.23	0.06	0	0.05	0	5.75	0.61	22.03	0.76	0.56	0.57	0.23	0.16	0.12	0.01	0.08	0
CascadeStereoStage2	sleeping_room_1_13	7.3	0.81	25.37	1.18	0.59	0.55	0.31	0.27	0.2	0.07	0.14	0.01	5.64	0.88	22.34	1.37	0.55	0.55	0.29	0.27	0.16	0.1	0.1	0.03	7.88	0.78	26.34	1.1	0.6	0.55	0.31	0.27	0.21	0.06	0.15	0.01
CascadeStereoStage2	dining_room_1_5	1.01	1.3	1.65	2.4	0.62	0.7	0.32	0.43	0.11	0.16	0.03	0.05	1.22	1.54	2.08	3.05	0.65	0.73	0.38	0.49	0.14	0.2	0.05	0.07	0.8	1.07	1.08	1.53	0.59	0.67	0.27	0.38	0.07	0.13	0	0.03
CascadeStereoStage2	dining_room_1_7	4.15	3.37	7.91	7.26	0.78	0.68	0.57	0.46	0.34	0.25	0.21	0.16	4.53	4.62	8.61	8.7	0.79	0.8	0.57	0.62	0.35	0.35	0.22	0.23	3.72	1.93	7.01	5.11	0.77	0.54	0.56	0.29	0.33	0.12	0.2	0.08
CascadeStereoStage2	dining_room_1_9	0.73	0.87	1.07	1.31	0.59	0.61	0.22	0.26	0.03	0.08	0.01	0.02	0.81	1.04	1.28	1.61	0.59	0.61	0.25	0.35	0.05	0.13	0.01	0.03	0.65	0.69	0.77	0.89	0.6	0.62	0.18	0.15	0.01	0.03	0	0.01
CascadeStereoStage2	floating_cubes1	2.99	1.91	3.85	2.62	0.77	0.72	0.64	0.53	0.56	0.38	0.42	0.17	2.96	2.03	3.92	2.83	0.77	0.72	0.61	0.53	0.52	0.37	0.4	0.21	3.01	1.83	3.79	2.46	0.77	0.72	0.66	0.54	0.58	0.39	0.43	0.13
CascadeStereoStage2	fruit1	0.98	0.77	1.43	1.08	0.6	0.58	0.3	0.21	0.13	0.06	0.03	0.01	1.09	0.89	1.5	1.27	0.65	0.61	0.38	0.28	0.15	0.09	0.02	0.03	0.93	0.7	1.38	0.96	0.57	0.56	0.26	0.17	0.11	0.05	0.03	0
CascadeStereoStage2	fruit6	1.32	1.21	2.45	2.28	0.58	0.64	0.29	0.34	0.15	0.1	0.11	0.06	1.79	1.9	3.13	3.35	0.65	0.72	0.38	0.46	0.24	0.23	0.16	0.14	1.13	0.93	2.12	1.65	0.55	0.6	0.25	0.29	0.12	0.05	0.09	0.03
CascadeStereoStage2	fruit8	1.05	0.77	1.66	0.98	0.65	0.64	0.34	0.25	0.12	0.03	0.02	0	1.17	0.92	1.91	1.23	0.66	0.66	0.37	0.34	0.15	0.08	0.03	0.01	0.99	0.7	1.53	0.84	0.65	0.64	0.33	0.21	0.1	0.01	0.01	0
CascadeStereoStage2	hacienda1	0.9	0.76	1.26	1.07	0.61	0.56	0.28	0.21	0.12	0.07	0.01	0	0.98	0.87	1.36	1.22	0.67	0.64	0.31	0.25	0.12	0.09	0.01	0.01	0.82	0.63	1.14	0.89	0.54	0.47	0.25	0.17	0.12	0.05	0	0
CascadeStereoStage2	hacienda4	0.71	0.94	0.95	2.89	0.58	0.55	0.23	0.17	0.04	0.02	0	0.02	0.76	0.85	1.02	2.12	0.61	0.59	0.26	0.2	0.04	0.02	0	0.01	0.66	1.05	0.85	3.57	0.54	0.5	0.2	0.12	0.04	0.03	0	0.03
CascadeStereoStage2	hacienda8	5.17	16.94	21.17	46.36	0.43	0.45	0.13	0.2	0.07	0.15	0.06	0.15	4.54	9.23	19.81	32.73	0.46	0.44	0.18	0.19	0.06	0.08	0.05	0.08	5.41	19.81	21.66	50.52	0.41	0.45	0.11	0.21	0.07	0.17	0.07	0.17
CascadeStereoStage2	landscape1_5	0.95	1.41	2.76	4.15	0.55	0.61	0.21	0.32	0.06	0.12	0.02	0.04	1.34	2.18	3.82	6.03	0.64	0.68	0.3	0.4	0.09	0.17	0.04	0.08	0.7	0.92	1.77	2.19	0.49	0.56	0.16	0.27	0.04	0.08	0.01	0.02
CascadeStereoStage2	landscape1_6	0.63	0.92	1.18	1.89	0.48	0.6	0.14	0.26	0.02	0.06	0.01	0.02	0.73	1.2	1.59	2.6	0.48	0.63	0.18	0.31	0.04	0.11	0.02	0.04	0.54	0.68	0.68	0.96	0.47	0.57	0.11	0.21	0.01	0.02	0	0
CascadeStereoStage2	landscape3_2	7.72	3.37	23.91	10.01	0.6	0.63	0.3	0.38	0.21	0.25	0.18	0.18	4.53	2.44	19.07	6.86	0.6	0.65	0.28	0.39	0.16	0.23	0.11	0.12	10	4.03	26.85	11.76	0.59	0.62	0.31	0.37	0.25	0.27	0.24	0.23
CascadeStereoStage2	landscape5_2	37.07	0.76	63.15	1.01	0.74	0.59	0.53	0.27	0.42	0.07	0.41	0	26.8	0.79	59.38	1	0.65	0.62	0.4	0.33	0.23	0.05	0.21	0	39.2	0.76	63.9	1.01	0.76	0.58	0.55	0.25	0.47	0.07	0.45	0
CascadeStereoStage2	living_room_1_1	1.35	0.73	5.88	0.99	0.62	0.54	0.29	0.22	0.11	0.06	0.02	0	1.74	0.89	7.5	1.21	0.59	0.61	0.32	0.31	0.18	0.1	0.03	0.01	0.91	0.55	3.11	0.67	0.67	0.48	0.26	0.11	0.03	0.01	0	0
CascadeStereoStage2	living_room_2_3	0.7	0.8	0.9	1.14	0.6	0.58	0.2	0.25	0.04	0.09	0	0.01	0.91	0.9	1.15	1.11	0.7	0.72	0.31	0.32	0.09	0.08	0	0	0.65	0.78	0.82	1.15	0.57	0.54	0.18	0.23	0.02	0.09	0	0.01
CascadeStereoStage1	abstract_bowls_1	1.64	1.37	2.5	1.87	0.82	0.84	0.64	0.63	0.25	0.13	0.06	0.02	1.59	1.56	2.77	2.34	0.78	0.8	0.59	0.6	0.23	0.21	0.05	0.05	1.68	1.2	2.23	1.32	0.85	0.87	0.68	0.66	0.27	0.06	0.06	0
CascadeStereoStage1	abstract_bowls_14	4.01	1.64	6.59	2.38	0.85	0.82	0.69	0.58	0.46	0.26	0.29	0.07	2.87	1.94	5.32	2.98	0.83	0.81	0.66	0.62	0.35	0.3	0.15	0.1	4.71	1.46	7.26	1.93	0.86	0.82	0.72	0.55	0.52	0.23	0.38	0.04
CascadeStereoStage1	bones_3	2.8	3.52	6.74	7.85	0.85	0.84	0.68	0.65	0.3	0.28	0.09	0.13	3.4	4.49	8.05	9.32	0.82	0.83	0.65	0.67	0.35	0.36	0.13	0.18	1.49	1.4	1.69	2.53	0.93	0.86	0.74	0.62	0.19	0.1	0.01	0.02
CascadeStereoStage1	bones_6	3.37	4.36	7.74	9.06	0.88	0.87	0.73	0.73	0.35	0.37	0.11	0.17	3.73	4.84	8.44	9.87	0.87	0.86	0.71	0.72	0.36	0.4	0.13	0.19	2.05	2.55	4.17	5.01	0.91	0.9	0.77	0.75	0.3	0.28	0.06	0.08
CascadeStereoStage1	Chairs4	2.15	2.25	2.96	3.09	0.83	0.86	0.66	0.69	0.36	0.42	0.17	0.15	2.32	2.47	3.16	3.34	0.84	0.88	0.69	0.73	0.42	0.49	0.19	0.18	1.59	1.55	2.26	2.15	0.79	0.79	0.58	0.58	0.18	0.23	0.1	0.08
CascadeStereoStage1	chess_8	2.12	1.37	3.2	1.75	0.82	0.81	0.63	0.59	0.3	0.2	0.16	0.02	2.07	1.55	3.06	2.05	0.82	0.8	0.62	0.59	0.3	0.27	0.15	0.04	2.17	1.2	3.33	1.41	0.82	0.82	0.64	0.58	0.29	0.14	0.18	0
CascadeStereoStage1	childroom_1	1.46	1.63	2.66	2.4	0.8	0.83	0.59	0.63	0.21	0.26	0.03	0.04	1.63	1.77	3.64	2.73	0.79	0.81	0.58	0.61	0.26	0.3	0.05	0.06	1.34	1.54	1.67	2.14	0.81	0.84	0.59	0.64	0.18	0.23	0.02	0.03
CascadeStereoStage1	childroom_12	5.19	3.03	10.36	6.62	0.84	0.82	0.65	0.64	0.37	0.27	0.24	0.14	8.49	4.82	14.3	9.23	0.91	0.86	0.77	0.7	0.5	0.41	0.39	0.26	1.92	1.27	3.33	1.71	0.78	0.79	0.52	0.58	0.23	0.12	0.1	0.02
CascadeStereoStage1	childroom_2	2.16	2.04	6.27	5.15	0.88	0.82	0.7	0.58	0.3	0.22	0.05	0.06	2.22	2.86	5.92	7.15	0.85	0.82	0.64	0.63	0.29	0.31	0.08	0.12	2.1	1.29	6.59	1.93	0.92	0.82	0.76	0.54	0.3	0.14	0.02	0.01
CascadeStereoStage1	childroom_4	1.05	1.1	1.33	1.41	0.75	0.76	0.48	0.48	0.09	0.11	0	0.01	1.24	1.28	1.57	1.66	0.83	0.81	0.59	0.56	0.14	0.18	0.01	0.01	0.85	0.91	1.03	1.1	0.67	0.71	0.36	0.4	0.04	0.04	0	0
CascadeStereoStage1	childroom_6	1.33	1.32	1.79	1.76	0.8	0.81	0.59	0.59	0.14	0.14	0.04	0.02	1.35	1.51	1.8	2.11	0.8	0.84	0.62	0.64	0.15	0.18	0.03	0.04	1.32	1.15	1.78	1.4	0.79	0.79	0.56	0.54	0.13	0.11	0.04	0.01
CascadeStereoStage1	childroom_9	1.49	1.53	2.05	2.18	0.84	0.81	0.61	0.59	0.21	0.27	0.04	0.04	1.8	1.97	2.63	2.96	0.88	0.86	0.71	0.69	0.27	0.34	0.07	0.08	1.31	1.28	1.63	1.57	0.81	0.78	0.56	0.54	0.17	0.22	0.02	0.01
CascadeStereoStage1	cloth4	2.15	1.48	9.59	3.99	0.69	0.77	0.43	0.53	0.15	0.18	0.03	0.01	3.6	2.01	14.74	6.23	0.68	0.8	0.46	0.57	0.16	0.18	0.06	0.02	1.76	1.34	7.66	3.13	0.69	0.76	0.43	0.52	0.15	0.19	0.03	0.01
CascadeStereoStage1	cloth6	1.19	1.17	1.56	1.4	0.76	0.76	0.5	0.55	0.14	0.14	0.02	0	1.3	1.26	1.76	1.54	0.76	0.78	0.51	0.56	0.19	0.18	0.03	0.01	1.14	1.13	1.45	1.33	0.75	0.75	0.5	0.55	0.12	0.13	0.02	0
CascadeStereoStage1	cloth7	6.06	1.71	13.87	2.6	0.83	0.83	0.67	0.62	0.4	0.27	0.27	0.05	3.85	1.88	11.21	3.06	0.79	0.81	0.59	0.6	0.28	0.26	0.14	0.08	7.93	1.57	15.77	2.15	0.85	0.84	0.73	0.63	0.51	0.28	0.37	0.03
CascadeStereoStage1	coral6	1.66	1.55	2.6	2.22	0.81	0.83	0.6	0.61	0.21	0.2	0.07	0.05	2.15	2.14	3.3	3.08	0.85	0.85	0.66	0.68	0.34	0.37	0.12	0.12	1.35	1.19	2.05	1.46	0.78	0.82	0.56	0.56	0.13	0.09	0.04	0.01
CascadeStereoStage1	dining_room_1_1	2.47	3.8	5.67	10.57	0.82	0.85	0.6	0.7	0.28	0.37	0.12	0.16	3.31	5.33	7.26	13.65	0.84	0.86	0.66	0.72	0.37	0.46	0.18	0.25	1.28	1.63	1.74	2.35	0.8	0.83	0.52	0.67	0.15	0.25	0.03	0.04
CascadeStereoStage1	office_top5	1.21	1.3	1.49	1.56	0.74	0.83	0.55	0.62	0.16	0.15	0.01	0.01	1.47	1.61	1.82	1.98	0.77	0.84	0.62	0.66	0.3	0.31	0.02	0.03	1.07	1.13	1.29	1.28	0.72	0.82	0.52	0.59	0.09	0.07	0	0
CascadeStereoStage1	park1	1.13	1.1	1.33	1.31	0.81	0.78	0.54	0.54	0.09	0.09	0	0	1.32	1.28	1.54	1.52	0.86	0.83	0.64	0.62	0.17	0.17	0.01	0.01	0.92	0.91	1.05	1.05	0.76	0.73	0.44	0.45	0.01	0.01	0	0
CascadeStereoStage1	park10	1.74	1.82	2.77	2.77	0.83	0.84	0.64	0.65	0.22	0.27	0.07	0.07	1.99	2.1	3.27	3.27	0.82	0.83	0.62	0.66	0.28	0.34	0.1	0.11	1.28	1.29	1.44	1.45	0.85	0.86	0.68	0.64	0.1	0.16	0	0
CascadeStereoStage1	park6	1.59	2.19	3.15	5.19	0.75	0.78	0.6	0.59	0.24	0.21	0.03	0.07	2.31	4.09	5.02	8.7	0.79	0.8	0.6	0.6	0.28	0.31	0.08	0.2	1.23	1.22	1.48	1.47	0.73	0.76	0.6	0.59	0.23	0.15	0	0.01
CascadeStereoStage1	person1_1	24.92	1.79	43.86	4.61	0.8	0.77	0.68	0.58	0.52	0.09	0.46	0.03	13.77	3.1	30.36	7.42	0.75	0.81	0.55	0.59	0.34	0.17	0.29	0.09	28.45	1.38	47.34	3.24	0.81	0.76	0.72	0.57	0.58	0.07	0.51	0.01
CascadeStereoStage1	person1_3	1.68	3.64	2.75	12.75	0.86	0.83	0.7	0.66	0.31	0.25	0.02	0.05	1.87	4.56	3.96	14.91	0.83	0.81	0.62	0.6	0.3	0.26	0.05	0.09	1.58	3.15	1.8	11.44	0.87	0.84	0.74	0.69	0.31	0.25	0.01	0.03
CascadeStereoStage1	person1_8	13.13	3.36	31.32	10.96	0.83	0.84	0.65	0.66	0.42	0.28	0.32	0.12	13.32	5.57	32.52	17.33	0.71	0.74	0.51	0.56	0.37	0.36	0.29	0.19	13.08	2.82	31.02	8.74	0.86	0.86	0.69	0.68	0.44	0.26	0.33	0.1
CascadeStereoStage1	person2_5	1.54	1.2	3.43	1.47	0.76	0.78	0.58	0.56	0.26	0.13	0.04	0.01	1.75	1.31	5.12	1.72	0.76	0.76	0.57	0.53	0.26	0.22	0.06	0.02	1.43	1.14	1.93	1.3	0.77	0.8	0.59	0.58	0.27	0.09	0.03	0
CascadeStereoStage1	person3_10	1.99	1.58	6.77	2.11	0.83	0.83	0.6	0.65	0.19	0.28	0.05	0.04	3.41	2.09	11.76	3.01	0.79	0.83	0.61	0.66	0.29	0.36	0.11	0.12	1.47	1.4	3.45	1.67	0.85	0.82	0.59	0.64	0.16	0.24	0.03	0.01
CascadeStereoStage1	person3_3	2.79	1.41	8.3	1.92	0.85	0.8	0.63	0.62	0.3	0.21	0.16	0.02	3.92	1.82	13.95	2.87	0.77	0.79	0.52	0.62	0.27	0.31	0.15	0.06	2.41	1.27	5.14	1.48	0.88	0.8	0.66	0.62	0.31	0.18	0.16	0
CascadeStereoStage1	person3_4	2.36	2.4	5.42	5.37	0.82	0.78	0.6	0.61	0.21	0.24	0.06	0.07	2.99	3.31	6.61	6.96	0.81	0.81	0.59	0.61	0.26	0.31	0.11	0.13	2.01	1.88	4.61	4.21	0.82	0.77	0.61	0.61	0.17	0.2	0.04	0.03
CascadeStereoStage1	plant_vintage12	2.65	1.82	4.92	3.14	0.8	0.82	0.6	0.61	0.27	0.23	0.15	0.06	2.58	2.2	4.98	3.8	0.79	0.81	0.6	0.63	0.28	0.31	0.13	0.1	2.79	1.14	4.82	1.29	0.82	0.84	0.59	0.58	0.25	0.07	0.19	0
CascadeStereoStage1	plant_vintage14	3.12	1.05	15.64	1.24	0.67	0.77	0.44	0.48	0.13	0.1	0.03	0	3.45	1.13	16.8	1.36	0.78	0.77	0.5	0.53	0.15	0.14	0.03	0	2.99	1.01	15.14	1.19	0.62	0.77	0.42	0.47	0.12	0.09	0.03	0
CascadeStereoStage1	plant_vintage15	1.01	1.01	1.92	1.21	0.68	0.74	0.4	0.46	0.1	0.1	0	0	1.17	1.18	1.48	1.41	0.72	0.75	0.51	0.55	0.18	0.18	0.01	0	0.93	0.94	2.09	1.11	0.66	0.73	0.35	0.42	0.07	0.07	0	0
CascadeStereoStage1	plant_vintage2	2.19	1.31	10.44	1.55	0.8	0.8	0.63	0.62	0.22	0.2	0.01	0	2.59	1.25	12.97	1.58	0.77	0.76	0.57	0.55	0.24	0.18	0.02	0.01	1.96	1.34	8.68	1.53	0.81	0.82	0.67	0.67	0.21	0.21	0.01	0
CascadeStereoStage1	plant_vintage4	4.02	1.28	18.31	1.51	0.76	0.79	0.53	0.63	0.2	0.19	0.05	0	3.26	1.01	16.83	1.37	0.72	0.65	0.43	0.42	0.12	0.12	0.04	0.01	4.47	1.45	19.15	1.59	0.79	0.88	0.59	0.75	0.25	0.23	0.06	0
CascadeStereoStage1	plant_vintage7	1.77	1.8	2.77	3.06	0.82	0.82	0.62	0.62	0.24	0.23	0.08	0.07	1.96	2.27	3.24	3.93	0.79	0.81	0.58	0.6	0.25	0.3	0.11	0.13	1.55	1.24	2.07	1.42	0.84	0.83	0.68	0.63	0.22	0.15	0.04	0
CascadeStereoStage1	roundntwist4	1.26	1.65	1.68	5.42	0.75	0.79	0.49	0.6	0.19	0.25	0.02	0.03	1.4	1.85	1.83	6.66	0.8	0.82	0.55	0.6	0.24	0.28	0.03	0.04	1.04	1.34	1.41	2.6	0.67	0.75	0.41	0.58	0.12	0.2	0.02	0.01
CascadeStereoStage1	ScifiKnot1	1.76	1.49	5.98	1.98	0.75	0.79	0.55	0.61	0.22	0.23	0.07	0.05	2.41	1.76	9.37	2.45	0.78	0.79	0.58	0.61	0.3	0.28	0.12	0.1	1.35	1.33	1.95	1.62	0.72	0.78	0.53	0.61	0.18	0.2	0.04	0.02
CascadeStereoStage1	ScifiKnot4	2.77	1.76	4.17	3.07	0.81	0.79	0.65	0.53	0.47	0.25	0.23	0.07	3.62	3.24	5.51	5.31	0.87	0.86	0.77	0.72	0.54	0.47	0.29	0.21	2.48	1.26	3.6	1.75	0.79	0.77	0.62	0.47	0.44	0.17	0.21	0.02
CascadeStereoStage1	sleeping_room_1_11	1.38	1.31	1.67	1.57	0.81	0.82	0.61	0.63	0.24	0.17	0.01	0	1.56	1.46	1.97	1.87	0.81	0.82	0.62	0.62	0.29	0.25	0.03	0.02	1.32	1.26	1.55	1.44	0.81	0.82	0.61	0.63	0.22	0.15	0	0
CascadeStereoStage1	living_room_3_5	1.87	2.05	3.02	3.1	0.82	0.8	0.65	0.63	0.26	0.36	0.07	0.11	2.07	2.51	3.37	3.76	0.82	0.83	0.66	0.68	0.33	0.43	0.09	0.16	1.69	1.64	2.68	2.37	0.82	0.77	0.63	0.58	0.21	0.29	0.05	0.06
CascadeStereoStage1	living_room_3_9	1.2	1.27	1.43	1.48	0.78	0.81	0.57	0.62	0.15	0.17	0	0	1.24	1.3	1.57	1.59	0.73	0.78	0.54	0.58	0.21	0.22	0	0	1.18	1.26	1.36	1.43	0.81	0.82	0.59	0.63	0.11	0.15	0	0
CascadeStereoStage1	mannequins_10	2.99	9.28	6.55	19.62	0.81	0.81	0.65	0.65	0.3	0.36	0.13	0.24	3.46	12.69	7.49	23.73	0.82	0.85	0.66	0.7	0.35	0.47	0.15	0.32	2.17	3.34	4.45	8.6	0.78	0.75	0.63	0.56	0.22	0.17	0.08	0.1
CascadeStereoStage1	mannequins_12	5.5	2.32	12.49	4.42	0.9	0.83	0.76	0.62	0.46	0.23	0.34	0.11	5.02	3.13	11.96	5.6	0.86	0.84	0.72	0.67	0.4	0.35	0.27	0.17	5.97	1.53	12.99	2.81	0.95	0.82	0.81	0.57	0.52	0.11	0.41	0.04
CascadeStereoStage1	mannequins_2	3.34	2.27	5.61	4.78	0.87	0.8	0.69	0.56	0.42	0.28	0.21	0.08	3.05	2.79	5.63	5.71	0.84	0.8	0.66	0.58	0.36	0.35	0.17	0.12	3.93	1.25	5.58	1.9	0.92	0.81	0.75	0.52	0.54	0.13	0.3	0.01
CascadeStereoStage1	mannequins_5	1.58	1.44	2.07	1.92	0.81	0.8	0.64	0.59	0.28	0.23	0.03	0.03	1.62	1.54	2.23	2.13	0.81	0.8	0.63	0.59	0.24	0.25	0.06	0.05	1.53	1.3	1.82	1.59	0.81	0.79	0.66	0.59	0.32	0.19	0	0.01
CascadeStereoStage1	mannequins_9	1.9	1.89	2.76	3.63	0.8	0.78	0.63	0.56	0.28	0.22	0.13	0.07	1.79	2.24	2.62	4.19	0.81	0.8	0.63	0.6	0.27	0.28	0.09	0.1	2.14	1.12	3.04	1.89	0.8	0.75	0.63	0.48	0.3	0.07	0.21	0.01
CascadeStereoStage1	Minicubes4	3.9	3.49	6.17	5.75	0.82	0.85	0.69	0.68	0.45	0.37	0.28	0.24	3.6	3.43	5.96	5.76	0.81	0.86	0.68	0.7	0.43	0.37	0.24	0.22	4.45	3.6	6.56	5.74	0.84	0.84	0.72	0.65	0.48	0.36	0.36	0.28
CascadeStereoStage1	Minicubes5	3.37	2.97	5.26	5.74	0.87	0.87	0.72	0.7	0.46	0.38	0.27	0.19	2.82	2.74	4.94	6.12	0.83	0.85	0.67	0.67	0.39	0.34	0.2	0.15	4.16	3.3	5.7	5.14	0.91	0.89	0.8	0.73	0.56	0.43	0.38	0.25
CascadeStereoStage1	Minicubes9	2.96	1.6	10.56	2.09	0.84	0.84	0.66	0.66	0.37	0.28	0.13	0.04	2.67	1.72	10.29	2.41	0.82	0.8	0.62	0.61	0.29	0.32	0.11	0.06	3.33	1.45	10.88	1.61	0.87	0.89	0.71	0.72	0.46	0.24	0.17	0
CascadeStereoStage1	moto3	1.33	1.54	1.6	1.88	0.84	0.85	0.59	0.65	0.21	0.28	0.02	0.04	1.6	1.84	1.88	2.19	0.88	0.88	0.7	0.75	0.29	0.38	0.03	0.07	1.12	1.31	1.34	1.59	0.8	0.83	0.5	0.57	0.14	0.19	0	0.01
CascadeStereoStage1	music1_1	2.93	2.34	5.9	4.53	0.83	0.85	0.67	0.67	0.34	0.25	0.12	0.09	3.25	2.8	7.24	5.68	0.8	0.82	0.62	0.63	0.32	0.33	0.13	0.13	2.77	2.11	5.1	3.83	0.85	0.86	0.69	0.69	0.35	0.21	0.11	0.08
CascadeStereoStage1	music1_6	2.26	2.81	3.67	5.27	0.84	0.84	0.67	0.67	0.35	0.34	0.12	0.14	2.49	3.68	4.19	6.49	0.81	0.85	0.65	0.7	0.39	0.45	0.14	0.22	1.92	1.51	2.74	2.54	0.88	0.82	0.71	0.63	0.29	0.18	0.07	0.02
CascadeStereoStage1	music1_7	1.65	1.28	2.2	1.52	0.81	0.81	0.64	0.62	0.27	0.15	0.07	0.01	1.87	1.58	2.52	1.93	0.82	0.84	0.67	0.66	0.34	0.29	0.11	0.04	1.56	1.15	2.05	1.31	0.81	0.8	0.63	0.6	0.25	0.08	0.05	0
CascadeStereoStage1	music1_9	7.46	1.84	16.09	3.43	0.81	0.77	0.68	0.54	0.49	0.23	0.38	0.08	6.1	2.76	13.4	5.34	0.73	0.76	0.55	0.58	0.34	0.34	0.24	0.13	7.84	1.58	16.76	2.67	0.83	0.77	0.71	0.53	0.53	0.19	0.42	0.06
CascadeStereoStage1	nest5	4	4.03	18.75	18.89	0.89	0.88	0.76	0.71	0.48	0.41	0.18	0.2	4.82	5.31	23.87	24.08	0.87	0.88	0.74	0.75	0.47	0.51	0.21	0.27	3.02	2.51	9.56	9.52	0.91	0.87	0.78	0.66	0.49	0.29	0.15	0.11
CascadeStereoStage1	office1	2.79	1.17	11.92	1.31	0.85	0.85	0.69	0.61	0.21	0.08	0.05	0	2.58	1.22	11.6	1.43	0.84	0.82	0.66	0.57	0.21	0.15	0.03	0	2.91	1.13	12.09	1.24	0.85	0.87	0.71	0.64	0.21	0.04	0.06	0
CascadeStereoStage1	office12	2.8	2.14	3.79	4.01	0.87	0.8	0.74	0.59	0.54	0.22	0.24	0.1	3.01	3.12	4.18	5.49	0.89	0.83	0.79	0.67	0.6	0.35	0.22	0.18	2.7	1.62	3.57	2.95	0.87	0.78	0.71	0.55	0.5	0.15	0.25	0.06
CascadeStereoStage1	office14	2.87	2.69	6.1	5.62	0.82	0.8	0.63	0.57	0.27	0.29	0.12	0.13	3.07	3.09	6.32	6.12	0.85	0.86	0.67	0.67	0.33	0.37	0.13	0.17	2.74	2.41	5.93	5.24	0.8	0.75	0.61	0.5	0.24	0.24	0.1	0.1
CascadeStereoStage1	office2	2.73	1.39	11.81	1.59	0.84	0.85	0.64	0.66	0.24	0.2	0.03	0	2.56	1.29	12.05	1.53	0.82	0.83	0.61	0.6	0.23	0.18	0.01	0.01	2.79	1.43	11.72	1.62	0.85	0.86	0.65	0.68	0.24	0.21	0.04	0
CascadeStereoStage1	sleeping_room_1_15	5.57	1.27	18.77	1.5	0.88	0.8	0.72	0.61	0.39	0.18	0.16	0	6.36	1.33	21.67	1.6	0.84	0.8	0.7	0.6	0.37	0.22	0.13	0.01	4.95	1.23	16.12	1.42	0.91	0.81	0.75	0.62	0.41	0.15	0.19	0
CascadeStereoStage1	sleeping_room_1_3	1.4	1.37	2.72	2.76	0.8	0.8	0.6	0.58	0.19	0.17	0.01	0.01	1.76	1.65	4.71	4.25	0.83	0.79	0.65	0.56	0.25	0.22	0.02	0.02	1.28	1.28	1.58	2.04	0.78	0.8	0.59	0.58	0.17	0.16	0	0
CascadeStereoStage1	sleeping_room_1_7	1.09	1.19	1.37	1.52	0.71	0.75	0.49	0.53	0.13	0.13	0.01	0.02	1.22	1.37	1.56	1.84	0.73	0.77	0.5	0.55	0.19	0.18	0.02	0.06	1.03	1.11	1.28	1.34	0.69	0.75	0.48	0.52	0.1	0.11	0	0
CascadeStereoStage1	spaceStation2	4.16	2.92	8	5.83	0.92	0.91	0.83	0.82	0.72	0.72	0.15	0.08	3.42	2.91	6.54	6.33	0.84	0.81	0.65	0.64	0.43	0.43	0.16	0.14	4.54	2.92	8.65	5.56	0.96	0.96	0.92	0.92	0.86	0.87	0.14	0.06
CascadeStereoStage1	stack_circles4	28.27	1.73	47.88	2.53	0.86	0.81	0.77	0.66	0.65	0.33	0.55	0.05	15.34	2.21	35.04	3.54	0.84	0.82	0.71	0.66	0.5	0.37	0.35	0.11	35.48	1.46	53.72	1.72	0.87	0.8	0.81	0.67	0.73	0.3	0.66	0.01
CascadeStereoStage1	stack_circles9	17.21	1.67	37.18	2.44	0.91	0.86	0.78	0.69	0.55	0.2	0.43	0.05	9.21	2.07	26.12	3.28	0.85	0.85	0.7	0.68	0.42	0.31	0.28	0.09	22.24	1.42	42.69	1.71	0.94	0.86	0.83	0.69	0.64	0.13	0.52	0.03
CascadeStereoStage1	time_travellers_10	37.02	11.91	49.39	24.19	0.84	0.77	0.73	0.62	0.61	0.37	0.58	0.24	28.18	16.21	42.01	28.72	0.87	0.85	0.71	0.69	0.51	0.46	0.46	0.32	40.62	10.16	52.1	22.08	0.84	0.74	0.74	0.6	0.65	0.34	0.63	0.2
CascadeStereoStage1	time_travellers_13	10.61	2.19	16.46	4.05	0.9	0.82	0.83	0.66	0.66	0.3	0.59	0.09	8.03	3.05	16.13	5.59	0.85	0.83	0.73	0.66	0.5	0.37	0.42	0.17	12.38	1.6	16.68	2.5	0.93	0.81	0.9	0.66	0.77	0.26	0.71	0.03
CascadeStereoStage1	time_travellers_15	18.62	3.24	29.35	7.88	0.97	0.8	0.89	0.58	0.63	0.26	0.55	0.09	13.69	5.36	27.13	10.93	0.94	0.85	0.8	0.67	0.48	0.36	0.37	0.19	21.47	2.01	30.56	5.38	1	0.78	0.93	0.53	0.71	0.2	0.65	0.03
CascadeStereoStage1	time_travellers_2	7.8	3.61	14.1	7.45	0.9	0.81	0.8	0.6	0.56	0.34	0.48	0.17	7.1	5.02	17.64	9.08	0.85	0.86	0.73	0.75	0.47	0.5	0.34	0.25	8.31	2.59	10.86	6	0.93	0.77	0.86	0.49	0.63	0.23	0.57	0.11
CascadeStereoStage1	time_travellers_20	9.5	1.47	21.22	2.06	0.88	0.79	0.79	0.6	0.63	0.21	0.51	0.04	7.47	1.99	19	2.95	0.86	0.81	0.73	0.65	0.5	0.34	0.4	0.1	10.54	1.21	22.27	1.41	0.89	0.78	0.81	0.58	0.69	0.14	0.57	0
CascadeStereoStage1	time_travellers_24	46.13	11.42	54.88	25.73	0.9	0.9	0.82	0.77	0.74	0.32	0.72	0.19	32.48	14.33	47.05	28.9	0.82	0.87	0.68	0.69	0.55	0.42	0.49	0.28	50.77	10.43	57.31	24.56	0.93	0.92	0.86	0.79	0.81	0.29	0.8	0.16
CascadeStereoStage1	time_travellers_25	12.32	5.67	20.41	13.19	0.92	0.84	0.8	0.67	0.54	0.32	0.49	0.15	11.18	7.68	21.29	15.58	0.88	0.9	0.74	0.78	0.48	0.48	0.39	0.24	13.07	4.34	19.81	11.34	0.94	0.8	0.83	0.6	0.57	0.21	0.55	0.1
CascadeStereoStage1	time_travellers_3	14.31	6.84	19.79	14.36	0.95	0.78	0.86	0.56	0.65	0.31	0.59	0.21	11.02	6.48	17.68	13.41	0.92	0.81	0.8	0.64	0.54	0.38	0.45	0.24	16.76	7.11	21.22	15.03	0.98	0.75	0.91	0.51	0.73	0.26	0.69	0.2
CascadeStereoStage1	twirls2	1.41	1.18	1.96	1.51	0.82	0.72	0.57	0.51	0.16	0.17	0.05	0.01	1.54	1.38	2.18	1.77	0.81	0.77	0.57	0.57	0.21	0.24	0.06	0.02	1.32	1.05	1.8	1.31	0.82	0.68	0.56	0.47	0.13	0.13	0.04	0
CascadeStereoStage1	twirls3	1.38	1.37	2.61	1.65	0.8	0.81	0.57	0.61	0.18	0.2	0.02	0.02	1.53	1.45	3.83	1.82	0.75	0.81	0.53	0.59	0.2	0.23	0.04	0.04	1.31	1.33	1.69	1.55	0.82	0.82	0.58	0.62	0.17	0.19	0.01	0
CascadeStereoStage1	voronoid_sphere6	3.45	7.06	7.31	13.28	0.74	0.84	0.55	0.7	0.31	0.4	0.14	0.26	4.02	9.67	8.22	15.92	0.75	0.87	0.56	0.75	0.34	0.53	0.17	0.37	2.49	2.68	5.45	6.85	0.71	0.81	0.53	0.63	0.25	0.17	0.09	0.06
CascadeStereoStage1	voronoid_sphere9	3.77	3.84	7.31	6.11	0.87	0.84	0.72	0.68	0.42	0.42	0.29	0.28	3.2	4.14	7.15	6.47	0.85	0.85	0.7	0.7	0.36	0.43	0.21	0.31	7.14	2.1	8.2	3.41	0.95	0.77	0.88	0.58	0.78	0.34	0.74	0.13
CascadeStereoStage1	walker4	7.89	2.56	11.03	3.84	0.94	0.84	0.86	0.69	0.72	0.4	0.65	0.17	6.81	3.37	10.91	4.93	0.89	0.84	0.74	0.71	0.55	0.49	0.48	0.27	8.56	2.06	11.11	2.97	0.97	0.84	0.93	0.67	0.83	0.35	0.75	0.11
CascadeStereoStage1	windmills4	1.51	2.05	5.53	8.51	0.73	0.79	0.49	0.56	0.17	0.19	0.03	0.04	2.72	3.81	11.28	15.23	0.82	0.8	0.61	0.63	0.27	0.35	0.08	0.1	1.18	1.57	1.96	5.31	0.7	0.79	0.46	0.53	0.15	0.15	0.01	0.02
CascadeStereoStage1	youngster_room10	5.5	1.26	20.15	1.61	0.78	0.76	0.57	0.54	0.25	0.21	0.1	0.01	4.52	1.57	18.05	2.05	0.83	0.81	0.66	0.63	0.3	0.29	0.07	0.04	5.98	1.12	21.08	1.35	0.76	0.74	0.53	0.49	0.23	0.17	0.11	0
CascadeStereoStage1	youngster_room14	3.58	1.61	5.26	2.24	0.88	0.8	0.75	0.59	0.48	0.23	0.3	0.09	3.02	1.7	5.18	2.58	0.82	0.77	0.61	0.52	0.35	0.23	0.21	0.11	3.89	1.56	5.3	2.03	0.91	0.82	0.82	0.62	0.56	0.23	0.36	0.07
CascadeStereoStage1	youngster_room4	1.88	1.21	8.01	1.4	0.73	0.82	0.52	0.6	0.18	0.12	0.02	0	3.23	1.17	13.47	1.43	0.78	0.77	0.55	0.54	0.2	0.14	0.04	0	1.2	1.23	2.36	1.38	0.71	0.84	0.51	0.63	0.17	0.11	0	0
CascadeStereoStage1	youngster_room7	1.78	1.51	2.48	1.86	0.88	0.89	0.67	0.71	0.28	0.21	0.06	0.02	1.86	1.61	2.66	2.17	0.86	0.84	0.67	0.64	0.31	0.27	0.08	0.04	1.74	1.45	2.39	1.68	0.89	0.91	0.67	0.75	0.27	0.17	0.06	0.01
CascadeStereoStage1	youngster_room9	1.82	1.22	5.52	1.43	0.85	0.8	0.65	0.62	0.24	0.13	0.02	0	2.14	1.3	8.29	1.61	0.82	0.78	0.63	0.57	0.26	0.22	0.02	0.01	1.69	1.18	3.75	1.34	0.86	0.81	0.66	0.64	0.24	0.1	0.02	0
CascadeStereoStage1	dining_room_1_13	1.93	1.33	2.61	1.89	0.82	0.78	0.66	0.53	0.36	0.19	0.12	0.02	1.89	1.69	2.45	2.38	0.87	0.82	0.71	0.66	0.36	0.34	0.07	0.02	1.95	1.11	2.7	1.53	0.79	0.76	0.63	0.45	0.36	0.1	0.14	0.01
CascadeStereoStage1	living_room_3_2	1.55	1.38	3.9	1.88	0.81	0.76	0.56	0.53	0.2	0.2	0.05	0.06	2.41	2.03	7.55	2.64	0.88	0.88	0.74	0.73	0.33	0.39	0.07	0.12	1.31	1.2	1.81	1.61	0.79	0.72	0.51	0.47	0.17	0.15	0.05	0.04
CascadeStereoStage1	office_top4	4.97	1.11	21.82	1.29	0.81	0.79	0.61	0.53	0.17	0.09	0.05	0	5.31	1.08	22.82	1.33	0.77	0.73	0.59	0.48	0.23	0.14	0.04	0	4.82	1.12	21.35	1.28	0.83	0.82	0.63	0.56	0.14	0.07	0.05	0
CascadeStereoStage1	sleeping_room_1_13	6.47	1.21	23.21	1.53	0.79	0.72	0.6	0.54	0.34	0.18	0.14	0	5.52	1.29	21.28	1.62	0.76	0.76	0.52	0.56	0.24	0.21	0.11	0.01	6.79	1.19	23.83	1.5	0.8	0.71	0.62	0.53	0.37	0.17	0.15	0
CascadeStereoStage1	dining_room_1_5	1.29	1.58	1.88	3.08	0.76	0.83	0.5	0.65	0.15	0.23	0.03	0.03	1.5	1.85	2.28	4.11	0.77	0.82	0.54	0.65	0.2	0.28	0.05	0.06	1.08	1.32	1.38	1.53	0.74	0.83	0.47	0.66	0.1	0.19	0.02	0.01
CascadeStereoStage1	dining_room_1_7	4.37	3.39	8.15	6.97	0.89	0.82	0.76	0.67	0.43	0.32	0.19	0.14	4.92	4.49	8.82	8.42	0.91	0.88	0.78	0.74	0.49	0.45	0.21	0.2	3.73	2.12	7.3	4.79	0.87	0.76	0.72	0.58	0.37	0.17	0.16	0.07
CascadeStereoStage1	dining_room_1_9	1.25	1.27	1.62	1.69	0.8	0.76	0.57	0.57	0.15	0.17	0.01	0.02	1.32	1.42	1.84	1.99	0.78	0.79	0.54	0.57	0.19	0.23	0.02	0.03	1.17	1.1	1.32	1.29	0.82	0.74	0.6	0.57	0.11	0.09	0	0
CascadeStereoStage1	floating_cubes1	2.87	1.71	3.62	2.29	0.85	0.79	0.73	0.59	0.55	0.33	0.33	0.09	2.88	2.11	3.68	2.76	0.87	0.83	0.74	0.67	0.53	0.42	0.33	0.15	2.87	1.41	3.57	1.85	0.83	0.76	0.73	0.53	0.56	0.26	0.33	0.04
CascadeStereoStage1	fruit1	1.44	1.1	1.86	1.35	0.81	0.78	0.56	0.49	0.23	0.1	0.05	0.01	1.49	1.27	1.91	1.61	0.79	0.77	0.58	0.53	0.26	0.17	0.05	0.03	1.42	1.01	1.83	1.19	0.81	0.78	0.55	0.47	0.22	0.07	0.05	0
CascadeStereoStage1	fruit6	1.72	1.48	2.79	2.19	0.78	0.79	0.57	0.58	0.17	0.19	0.11	0.05	2.16	2.18	3.63	3.25	0.81	0.82	0.65	0.66	0.27	0.38	0.14	0.12	1.55	1.2	2.37	1.57	0.77	0.77	0.53	0.55	0.14	0.12	0.09	0.02
CascadeStereoStage1	fruit8	1.47	1.23	2.22	1.43	0.83	0.83	0.65	0.61	0.2	0.12	0.01	0	1.61	1.32	3.06	1.62	0.81	0.78	0.65	0.57	0.24	0.21	0.02	0.01	1.4	1.18	1.68	1.33	0.84	0.86	0.64	0.62	0.18	0.08	0.01	0
CascadeStereoStage1	hacienda1	1.36	1.17	1.69	1.48	0.8	0.75	0.61	0.54	0.17	0.11	0.03	0.01	1.45	1.35	1.8	1.67	0.84	0.83	0.65	0.64	0.19	0.15	0.04	0.03	1.26	0.98	1.57	1.24	0.75	0.66	0.55	0.43	0.16	0.07	0.01	0
CascadeStereoStage1	hacienda4	1.18	1.61	1.44	3	0.75	0.79	0.55	0.61	0.15	0.21	0	0.03	1.28	1.53	1.55	2.65	0.77	0.78	0.59	0.63	0.19	0.23	0	0.02	1.08	1.69	1.31	3.35	0.73	0.79	0.51	0.59	0.12	0.19	0	0.04
CascadeStereoStage1	hacienda8	2.33	11.29	9.99	36.8	0.66	0.77	0.4	0.44	0.1	0.15	0.04	0.1	3	8.77	12.37	31.13	0.74	0.77	0.49	0.49	0.14	0.15	0.04	0.08	2.08	12.23	8.94	38.71	0.63	0.77	0.36	0.42	0.08	0.15	0.04	0.11
CascadeStereoStage1	landscape1_5	1.4	1.46	2.14	2.37	0.81	0.81	0.61	0.6	0.16	0.21	0.03	0.02	1.66	1.85	2.81	3.33	0.83	0.84	0.66	0.67	0.21	0.29	0.05	0.05	1.23	1.21	1.56	1.45	0.79	0.79	0.57	0.55	0.12	0.16	0.02	0
CascadeStereoStage1	landscape1_6	1.22	1.4	1.68	2.04	0.78	0.82	0.53	0.6	0.12	0.18	0.02	0.02	1.36	1.62	2.05	2.62	0.77	0.81	0.56	0.62	0.17	0.23	0.03	0.05	1.1	1.21	1.31	1.39	0.78	0.83	0.5	0.59	0.08	0.14	0.01	0
CascadeStereoStage1	landscape3_2	4.27	2.72	15.89	8.29	0.84	0.83	0.66	0.68	0.3	0.32	0.1	0.12	2.17	2.18	7.06	5.44	0.84	0.85	0.66	0.68	0.25	0.29	0.05	0.07	5.77	3.1	19.93	9.84	0.84	0.82	0.66	0.68	0.34	0.35	0.14	0.15
CascadeStereoStage1	landscape5_2	36.85	1.51	64.88	1.91	0.86	0.81	0.74	0.6	0.43	0.26	0.35	0.05	27.83	1.37	61.66	1.73	0.83	0.81	0.68	0.61	0.33	0.21	0.2	0.02	38.72	1.54	65.53	1.94	0.87	0.81	0.75	0.6	0.45	0.27	0.38	0.05
CascadeStereoStage1	living_room_1_1	1.77	1.27	5.72	1.57	0.84	0.79	0.64	0.54	0.24	0.2	0.03	0.01	2.1	1.48	7.55	1.82	0.81	0.81	0.61	0.61	0.27	0.27	0.06	0.02	1.4	1.03	2.2	1.21	0.87	0.76	0.66	0.45	0.19	0.11	0	0
CascadeStereoStage1	living_room_2_3	1.33	1.3	1.53	1.53	0.83	0.8	0.66	0.61	0.17	0.2	0	0	1.58	1.4	1.75	1.64	0.94	0.82	0.77	0.63	0.26	0.24	0	0	1.27	1.28	1.48	1.5	0.8	0.8	0.63	0.61	0.15	0.19	0	0
CascadeStereoFt	abstract_bowls_1	6.11	0.29	11.2	0.94	0.67	0.1	0.49	0.03	0.38	0.01	0.32	0.01	2.88	0.46	6.72	1.37	0.59	0.19	0.36	0.06	0.23	0.03	0.16	0.02	8.9	0.15	13.96	0.21	0.74	0.03	0.6	0	0.51	0	0.45	0
CascadeStereoFt	abstract_bowls_14	10.89	0.28	17.44	0.74	0.77	0.09	0.64	0.03	0.55	0.02	0.52	0.01	6.42	0.44	13.74	1.12	0.66	0.17	0.46	0.06	0.35	0.03	0.3	0.02	13.6	0.18	19.34	0.35	0.84	0.04	0.74	0.01	0.68	0.01	0.65	0
CascadeStereoFt	bones_3	2.67	1.77	6.92	6.11	0.62	0.29	0.34	0.15	0.19	0.1	0.11	0.06	3.37	2.44	8.2	7.33	0.65	0.39	0.38	0.22	0.22	0.14	0.14	0.09	1.13	0.3	2.34	1.24	0.57	0.07	0.24	0.01	0.14	0	0.04	0
CascadeStereoFt	bones_6	3.1	1.95	8.34	6.31	0.61	0.41	0.37	0.21	0.2	0.11	0.12	0.07	3.63	2.39	9.34	7.1	0.61	0.48	0.38	0.26	0.21	0.14	0.14	0.09	1.12	0.32	1.89	0.52	0.59	0.18	0.34	0.03	0.15	0	0.04	0
CascadeStereoFt	Chairs4	1.99	0.68	3.3	1.78	0.66	0.26	0.43	0.11	0.29	0.06	0.18	0.04	2.24	0.8	3.56	1.99	0.72	0.3	0.49	0.14	0.34	0.08	0.21	0.05	1.19	0.3	2.29	0.81	0.48	0.11	0.24	0.01	0.15	0	0.09	0
CascadeStereoFt	chess_8	1.58	0.33	2.98	0.81	0.55	0.14	0.28	0.04	0.18	0.02	0.14	0.01	1.66	0.46	3.13	1.12	0.56	0.21	0.29	0.07	0.19	0.03	0.14	0.02	1.5	0.2	2.82	0.29	0.54	0.07	0.27	0.01	0.18	0	0.13	0
CascadeStereoFt	childroom_1	3.09	0.19	6.12	0.57	0.57	0.05	0.31	0.01	0.21	0.01	0.2	0	1.78	0.31	4.29	0.87	0.51	0.1	0.26	0.03	0.13	0.02	0.09	0.01	4.01	0.11	7.14	0.14	0.62	0	0.35	0	0.27	0	0.27	0
CascadeStereoFt	childroom_12	3.98	0.36	7.81	1.34	0.61	0.12	0.38	0.04	0.27	0.02	0.23	0.01	2.74	0.56	6.73	1.89	0.55	0.22	0.27	0.07	0.16	0.03	0.13	0.02	5.19	0.17	8.75	0.24	0.67	0.03	0.49	0	0.38	0	0.32	0
CascadeStereoFt	childroom_2	1.53	0.56	4.3	2.53	0.41	0.18	0.24	0.09	0.13	0.05	0.09	0.02	1.85	0.92	5.32	3.61	0.51	0.29	0.32	0.15	0.16	0.08	0.1	0.04	1.23	0.23	3.07	0.5	0.31	0.07	0.16	0.03	0.1	0.01	0.08	0
CascadeStereoFt	childroom_4	0.43	0.2	0.73	0.58	0.31	0.06	0.05	0.01	0.01	0	0	0	0.51	0.28	0.93	0.8	0.39	0.12	0.09	0.03	0.01	0.01	0	0	0.35	0.12	0.45	0.17	0.22	0.01	0.02	0	0	0	0	0
CascadeStereoFt	childroom_6	2.29	0.23	4.94	0.7	0.46	0.06	0.24	0.02	0.18	0.01	0.16	0.01	1.76	0.34	3.99	1.02	0.48	0.11	0.22	0.04	0.15	0.02	0.12	0.01	2.74	0.13	5.62	0.18	0.44	0.01	0.25	0	0.21	0	0.19	0
CascadeStereoFt	childroom_9	0.61	0.27	1.73	1.09	0.3	0.07	0.06	0.02	0.03	0.01	0.02	0.01	0.86	0.49	2.36	1.79	0.38	0.15	0.12	0.06	0.06	0.03	0.04	0.02	0.48	0.14	1.24	0.2	0.25	0.02	0.03	0	0.02	0	0.01	0
CascadeStereoFt	cloth4	1.43	0.22	3.12	0.35	0.59	0.11	0.33	0.03	0.13	0	0.06	0	1.59	0.3	3.51	0.43	0.64	0.17	0.41	0.05	0.16	0	0.05	0	1.38	0.2	3.01	0.32	0.58	0.1	0.31	0.02	0.12	0	0.06	0
CascadeStereoFt	cloth6	1.7	0.23	3.38	0.44	0.59	0.09	0.35	0.01	0.18	0	0.11	0	1.55	0.33	3.13	0.69	0.59	0.17	0.36	0.04	0.16	0.01	0.08	0.01	1.78	0.18	3.49	0.24	0.59	0.05	0.35	0	0.19	0	0.12	0
CascadeStereoFt	cloth7	4.86	0.43	7.54	1.79	0.72	0.17	0.52	0.04	0.42	0.01	0.37	0.01	3.19	0.7	5.95	2.49	0.64	0.28	0.37	0.09	0.27	0.03	0.22	0.02	6.26	0.21	8.66	0.84	0.79	0.08	0.65	0.01	0.55	0	0.5	0
CascadeStereoFt	coral6	3.84	0.22	6.03	0.72	0.67	0.05	0.5	0.02	0.4	0.01	0.34	0.01	3.62	0.39	5.45	1.14	0.75	0.13	0.59	0.06	0.44	0.03	0.33	0.02	3.98	0.12	6.36	0.16	0.61	0.01	0.44	0	0.37	0	0.34	0
CascadeStereoFt	dining_room_1_1	3.11	1.41	7.5	5.32	0.64	0.3	0.44	0.16	0.27	0.09	0.19	0.05	4.31	2.22	9.49	6.93	0.74	0.43	0.52	0.24	0.33	0.15	0.23	0.09	1.38	0.26	2.85	0.44	0.5	0.11	0.33	0.03	0.18	0.01	0.12	0
CascadeStereoFt	office_top5	3.78	0.18	6.08	0.41	0.74	0.05	0.5	0.01	0.34	0.01	0.3	0	2	0.29	3.83	0.65	0.68	0.12	0.36	0.03	0.19	0.01	0.14	0.01	4.73	0.12	6.99	0.17	0.77	0.01	0.58	0	0.41	0	0.38	0
CascadeStereoFt	park1	0.32	0.25	0.6	0.57	0.15	0.09	0.04	0.04	0.02	0.02	0	0	0.4	0.38	0.79	0.79	0.2	0.17	0.08	0.08	0.03	0.03	0.01	0.01	0.24	0.12	0.3	0.15	0.09	0.01	0	0	0	0	0	0
CascadeStereoFt	park10	0.88	0.76	2.05	2.09	0.4	0.25	0.15	0.13	0.08	0.08	0.04	0.05	1.14	1.1	2.53	2.6	0.46	0.38	0.22	0.2	0.12	0.12	0.07	0.07	0.41	0.13	0.48	0.19	0.31	0.02	0.02	0	0	0	0	0
CascadeStereoFt	park6	0.84	0.86	2.89	3.8	0.3	0.15	0.13	0.08	0.05	0.05	0.03	0.04	1.66	2.23	4.83	6.55	0.48	0.37	0.25	0.22	0.12	0.15	0.07	0.11	0.42	0.16	0.87	0.23	0.22	0.04	0.07	0.01	0.02	0	0.01	0
CascadeStereoFt	person1_1	23.94	0.25	45.18	1.39	0.76	0.07	0.58	0.02	0.51	0	0.46	0	13.69	0.62	31.64	2.81	0.7	0.16	0.47	0.05	0.38	0.02	0.33	0.02	27.2	0.14	48.69	0.21	0.78	0.04	0.61	0	0.55	0	0.5	0
CascadeStereoFt	person1_3	1.58	0.58	5.39	3.42	0.5	0.16	0.25	0.06	0.11	0.03	0.06	0.01	2.73	1.26	8.31	5.76	0.61	0.32	0.38	0.14	0.21	0.07	0.11	0.04	0.97	0.21	2.78	0.43	0.44	0.08	0.18	0.02	0.06	0.01	0.03	0
CascadeStereoFt	person1_8	13.83	0.25	29.92	0.72	0.84	0.05	0.63	0.02	0.46	0	0.43	0	11.92	0.41	28.45	1.53	0.75	0.1	0.5	0.05	0.39	0.02	0.36	0.01	14.3	0.21	30.27	0.27	0.86	0.04	0.66	0.01	0.48	0	0.45	0
CascadeStereoFt	person2_5	1.34	0.17	2.37	0.49	0.55	0.03	0.3	0.01	0.18	0	0.11	0	1.2	0.26	2.25	0.8	0.5	0.08	0.27	0.03	0.14	0.01	0.09	0.01	1.42	0.11	2.43	0.14	0.57	0	0.32	0	0.2	0	0.12	0
CascadeStereoFt	person3_10	1.54	0.22	3.88	0.74	0.4	0.06	0.25	0.03	0.15	0.01	0.11	0	1.63	0.43	3.29	1.37	0.51	0.16	0.32	0.08	0.19	0.03	0.12	0.01	1.51	0.14	4.07	0.22	0.36	0.02	0.22	0.01	0.14	0	0.1	0
CascadeStereoFt	person3_3	1.69	0.23	3.27	0.82	0.53	0.07	0.36	0.02	0.24	0	0.13	0	2.12	0.44	4.5	1.58	0.52	0.16	0.33	0.05	0.23	0.02	0.15	0.01	1.55	0.15	2.73	0.24	0.54	0.04	0.36	0.01	0.24	0	0.13	0
CascadeStereoFt	person3_4	1.62	0.37	4.63	1.83	0.33	0.07	0.17	0.02	0.12	0.01	0.09	0.01	2.43	0.75	6.39	3.02	0.43	0.15	0.23	0.06	0.15	0.04	0.12	0.03	1.16	0.15	3.24	0.2	0.28	0.02	0.14	0	0.1	0	0.08	0
CascadeStereoFt	plant_vintage12	2.4	0.77	4.78	2.47	0.66	0.21	0.37	0.11	0.22	0.07	0.16	0.04	2.28	1.11	4.71	3.08	0.63	0.3	0.36	0.17	0.21	0.1	0.15	0.07	2.61	0.18	4.91	0.27	0.7	0.04	0.38	0.01	0.23	0	0.19	0
CascadeStereoFt	plant_vintage14	10.48	0.2	13.28	0.34	0.82	0.04	0.73	0.01	0.65	0.01	0.63	0	4.84	0.29	8.43	0.56	0.64	0.12	0.48	0.05	0.34	0.02	0.3	0	12.78	0.16	14.81	0.2	0.89	0.01	0.83	0	0.77	0	0.77	0
CascadeStereoFt	plant_vintage15	10.07	0.2	13.4	0.36	0.83	0.04	0.66	0.02	0.6	0.01	0.57	0	4.29	0.3	8.27	0.6	0.66	0.12	0.41	0.05	0.29	0.03	0.23	0	12.64	0.15	15.13	0.18	0.91	0	0.77	0	0.74	0	0.73	0
CascadeStereoFt	plant_vintage2	1.92	0.21	3.32	0.3	0.53	0.06	0.34	0.01	0.23	0	0.21	0	1.55	0.29	2.87	0.43	0.51	0.14	0.31	0.03	0.17	0	0.14	0	2.13	0.17	3.56	0.2	0.54	0.02	0.36	0	0.27	0	0.24	0
CascadeStereoFt	plant_vintage4	2.29	0.23	4.26	0.46	0.47	0.06	0.32	0.02	0.26	0.01	0.22	0	1.53	0.39	3.41	0.72	0.41	0.17	0.25	0.06	0.16	0.03	0.11	0.01	2.74	0.13	4.69	0.16	0.5	0	0.36	0	0.32	0	0.29	0
CascadeStereoFt	plant_vintage7	1.92	0.57	3.76	1.83	0.58	0.19	0.28	0.08	0.19	0.04	0.16	0.03	1.73	0.9	3.61	2.48	0.53	0.3	0.26	0.14	0.17	0.08	0.14	0.06	2.14	0.17	3.93	0.25	0.64	0.05	0.3	0.01	0.21	0	0.18	0
CascadeStereoFt	roundntwist4	1.45	0.32	2.73	0.51	0.63	0.13	0.41	0.05	0.17	0.01	0.07	0	1.22	0.4	2.31	0.64	0.56	0.2	0.34	0.08	0.17	0.02	0.04	0	1.81	0.2	3.26	0.23	0.73	0.01	0.5	0	0.18	0	0.1	0
CascadeStereoFt	ScifiKnot1	1.54	0.2	3	0.48	0.53	0.05	0.3	0.02	0.19	0.01	0.13	0	1.68	0.31	2.86	0.75	0.62	0.11	0.37	0.04	0.24	0.02	0.15	0.01	1.46	0.13	3.09	0.17	0.48	0.01	0.26	0	0.16	0	0.11	0
CascadeStereoFt	ScifiKnot4	5.74	0.46	14.93	1.79	0.84	0.14	0.72	0.06	0.47	0.03	0.25	0.02	4.99	1.24	10.54	3.51	0.83	0.34	0.68	0.18	0.46	0.1	0.26	0.06	6	0.2	16.16	0.32	0.85	0.07	0.73	0.02	0.48	0	0.24	0
CascadeStereoFt	sleeping_room_1_11	2.53	0.32	7.46	0.55	0.6	0.16	0.26	0.03	0.15	0.01	0.11	0	2.33	0.5	6.74	0.92	0.6	0.31	0.28	0.09	0.16	0.02	0.11	0.01	2.61	0.25	7.71	0.33	0.6	0.11	0.25	0.01	0.14	0	0.12	0
CascadeStereoFt	living_room_3_5	1.38	0.9	3.48	3.15	0.47	0.21	0.18	0.12	0.1	0.07	0.07	0.05	1.9	0.91	4.36	3.05	0.53	0.28	0.26	0.14	0.16	0.07	0.11	0.04	0.92	0.9	2.44	3.23	0.41	0.16	0.11	0.1	0.06	0.07	0.04	0.06
CascadeStereoFt	living_room_3_9	1.08	0.17	2.39	0.37	0.33	0.03	0.17	0.01	0.1	0	0.09	0	0.9	0.25	2.06	0.59	0.36	0.09	0.17	0.03	0.07	0.01	0.05	0	1.17	0.13	2.54	0.17	0.32	0.01	0.18	0	0.12	0	0.1	0
CascadeStereoFt	mannequins_10	2.61	1.48	7.18	5.32	0.56	0.29	0.37	0.17	0.24	0.11	0.13	0.07	3.46	2.1	8.73	6.54	0.64	0.41	0.44	0.25	0.3	0.16	0.17	0.1	1.13	0.4	2.95	1.76	0.43	0.09	0.24	0.03	0.13	0.02	0.06	0.02
CascadeStereoFt	mannequins_12	5.03	0.5	8.95	2	0.64	0.13	0.5	0.05	0.43	0.03	0.37	0.02	3.73	0.83	7.37	2.83	0.56	0.22	0.39	0.1	0.3	0.05	0.25	0.04	6.3	0.18	10.26	0.23	0.72	0.03	0.61	0	0.55	0	0.49	0
CascadeStereoFt	mannequins_2	3.03	0.84	5.8	3.45	0.6	0.17	0.42	0.09	0.31	0.06	0.22	0.04	2.53	1.18	5.57	4.19	0.55	0.24	0.35	0.13	0.24	0.08	0.16	0.05	4.03	0.18	6.23	0.87	0.7	0.03	0.54	0	0.46	0	0.36	0
CascadeStereoFt	mannequins_5	1.56	0.36	3.11	0.9	0.59	0.14	0.38	0.06	0.16	0.03	0.09	0.01	1.37	0.46	2.78	1.12	0.51	0.2	0.32	0.09	0.15	0.04	0.08	0.02	1.84	0.21	3.53	0.44	0.7	0.05	0.45	0.03	0.16	0.02	0.09	0
CascadeStereoFt	mannequins_9	1.31	0.49	2.48	1.56	0.5	0.17	0.31	0.07	0.19	0.04	0.08	0.02	1.29	0.64	2.55	1.88	0.52	0.23	0.31	0.1	0.18	0.05	0.07	0.03	1.35	0.17	2.33	0.24	0.45	0.04	0.31	0.01	0.23	0	0.12	0
CascadeStereoFt	Minicubes4	5.03	0.69	7.78	2.28	0.75	0.19	0.59	0.08	0.47	0.05	0.38	0.04	4.07	0.95	6.85	2.82	0.72	0.26	0.53	0.12	0.4	0.08	0.3	0.06	6.83	0.19	9.27	0.27	0.82	0.06	0.71	0.01	0.61	0	0.53	0
CascadeStereoFt	Minicubes5	3.31	0.4	5.44	1.11	0.66	0.13	0.48	0.05	0.38	0.03	0.31	0.02	2.71	0.54	4.82	1.43	0.64	0.2	0.44	0.09	0.32	0.05	0.23	0.03	4.16	0.2	6.22	0.26	0.7	0.05	0.55	0	0.47	0	0.42	0
CascadeStereoFt	Minicubes9	7.07	0.34	10.42	1.07	0.78	0.1	0.64	0.05	0.54	0.03	0.47	0.02	4.03	0.51	7.27	1.42	0.69	0.16	0.51	0.08	0.37	0.05	0.27	0.03	10.96	0.13	13.4	0.21	0.9	0.03	0.81	0.01	0.75	0	0.72	0
CascadeStereoFt	moto3	1.51	0.26	2.71	0.49	0.6	0.09	0.35	0.02	0.2	0.01	0.11	0	1.44	0.37	2.41	0.69	0.62	0.18	0.38	0.05	0.21	0.03	0.1	0	1.56	0.17	2.93	0.21	0.59	0.02	0.32	0	0.19	0	0.12	0
CascadeStereoFt	music1_1	5.46	0.36	12.59	0.89	0.45	0.13	0.34	0.06	0.27	0.02	0.23	0.01	4.68	0.62	12.92	1.43	0.44	0.25	0.31	0.13	0.21	0.06	0.16	0.03	5.85	0.22	12.42	0.4	0.46	0.07	0.35	0.02	0.3	0	0.26	0
CascadeStereoFt	music1_6	2.56	1	8.22	3.16	0.53	0.25	0.33	0.15	0.22	0.09	0.14	0.06	3.12	1.49	9.45	4.03	0.57	0.37	0.38	0.22	0.25	0.14	0.17	0.09	1.73	0.29	5.96	0.91	0.47	0.08	0.25	0.04	0.16	0.02	0.1	0.01
CascadeStereoFt	music1_7	0.92	0.22	1.98	0.57	0.38	0.06	0.18	0.02	0.11	0.01	0.06	0.01	1.07	0.45	2.16	1	0.42	0.17	0.25	0.08	0.15	0.05	0.07	0.02	0.85	0.12	1.89	0.16	0.36	0.01	0.15	0	0.09	0	0.06	0
CascadeStereoFt	music1_9	7.74	0.33	12.51	1.01	0.73	0.11	0.61	0.05	0.51	0.02	0.45	0.01	6.05	0.77	12.66	1.94	0.56	0.28	0.39	0.15	0.27	0.08	0.23	0.04	8.22	0.21	12.47	0.51	0.77	0.06	0.67	0.03	0.58	0.01	0.51	0
CascadeStereoFt	nest5	4.1	3.04	18.85	18.66	0.7	0.33	0.47	0.22	0.27	0.15	0.19	0.11	5.37	4.26	23.8	23.65	0.74	0.46	0.52	0.31	0.34	0.21	0.24	0.15	2.59	1.6	10.18	9.82	0.64	0.19	0.42	0.11	0.2	0.08	0.12	0.07
CascadeStereoFt	office1	2.15	0.18	3.89	0.27	0.51	0.04	0.33	0.01	0.24	0	0.2	0	1.05	0.25	2.14	0.39	0.47	0.11	0.23	0.02	0.1	0.01	0.06	0	2.77	0.14	4.58	0.18	0.53	0.01	0.39	0	0.32	0	0.28	0
CascadeStereoFt	office12	3.14	0.55	5.78	2.06	0.73	0.13	0.59	0.06	0.38	0.04	0.22	0.03	4.05	1.04	6.8	3.12	0.82	0.25	0.69	0.13	0.47	0.09	0.28	0.06	2.66	0.29	5.16	1.15	0.68	0.06	0.53	0.03	0.33	0.02	0.19	0.02
CascadeStereoFt	office14	4.24	0.49	14.18	1.97	0.41	0.14	0.25	0.08	0.17	0.04	0.13	0.02	3.47	0.92	9.83	3.03	0.52	0.25	0.31	0.15	0.2	0.1	0.16	0.05	4.79	0.19	16.59	0.36	0.33	0.07	0.21	0.03	0.14	0	0.12	0
CascadeStereoFt	office2	1.76	0.19	3.2	0.25	0.47	0.04	0.26	0	0.21	0	0.2	0	1.02	0.25	2	0.35	0.47	0.12	0.2	0.01	0.09	0	0.08	0	2.03	0.17	3.54	0.21	0.46	0.01	0.28	0	0.25	0	0.24	0
CascadeStereoFt	sleeping_room_1_15	9.66	0.21	21.87	0.37	0.65	0.06	0.51	0.02	0.43	0.01	0.38	0	6.28	0.28	15.55	0.52	0.61	0.12	0.44	0.04	0.34	0.01	0.28	0	12.31	0.15	25.76	0.18	0.69	0.01	0.57	0	0.5	0	0.45	0
CascadeStereoFt	sleeping_room_1_3	1.51	0.14	3.17	0.21	0.46	0.02	0.22	0	0.14	0	0.13	0	1.95	0.2	3.77	0.32	0.52	0.08	0.28	0.01	0.19	0	0.17	0	1.36	0.11	2.95	0.15	0.44	0	0.2	0	0.12	0	0.11	0
CascadeStereoFt	sleeping_room_1_7	3.01	0.19	5.24	0.34	0.58	0.06	0.37	0.01	0.27	0	0.26	0	3.22	0.26	5.36	0.5	0.61	0.1	0.41	0.02	0.32	0.01	0.29	0	2.92	0.17	5.19	0.23	0.56	0.05	0.36	0	0.25	0	0.24	0
CascadeStereoFt	spaceStation2	0.72	0.66	2.54	2.35	0.16	0.14	0.07	0.06	0.05	0.05	0.03	0.03	1.53	1.4	4.24	3.93	0.36	0.32	0.17	0.15	0.12	0.11	0.09	0.08	0.3	0.28	0.79	0.71	0.06	0.05	0.02	0.02	0.02	0.02	0.01	0
CascadeStereoFt	stack_circles4	11.33	0.3	16.78	1.18	0.83	0.09	0.66	0.03	0.59	0.01	0.57	0.01	7.51	0.56	13.84	1.94	0.77	0.2	0.56	0.07	0.43	0.03	0.38	0.02	13.47	0.16	18.21	0.22	0.87	0.04	0.73	0	0.68	0	0.67	0
CascadeStereoFt	stack_circles9	11.16	0.29	26.02	1.04	0.71	0.09	0.59	0.04	0.52	0.01	0.46	0.01	6.47	0.5	20.63	1.64	0.56	0.18	0.4	0.07	0.32	0.03	0.27	0.02	14.12	0.17	28.91	0.3	0.8	0.04	0.72	0.02	0.64	0.01	0.58	0
CascadeStereoFt	time_travellers_10	20.92	1.54	31.27	7.78	0.72	0.17	0.62	0.09	0.57	0.05	0.55	0.04	19.65	4.28	31.11	13.55	0.72	0.38	0.58	0.24	0.48	0.14	0.44	0.1	21.44	0.43	31.33	3.23	0.72	0.08	0.64	0.03	0.61	0.01	0.6	0.01
CascadeStereoFt	time_travellers_13	4.92	0.33	8.58	1.53	0.7	0.08	0.58	0.02	0.5	0.01	0.4	0.01	4.66	0.62	8.45	2.39	0.6	0.14	0.46	0.06	0.39	0.04	0.35	0.03	5.1	0.13	8.67	0.2	0.76	0.03	0.67	0	0.57	0	0.43	0
CascadeStereoFt	time_travellers_15	8.72	0.86	12.69	4.28	0.7	0.14	0.59	0.06	0.56	0.03	0.54	0.02	7.75	1.89	13.26	6.77	0.63	0.29	0.46	0.15	0.4	0.09	0.37	0.06	9.28	0.27	12.36	1.56	0.74	0.06	0.66	0.01	0.65	0.01	0.64	0
CascadeStereoFt	time_travellers_2	5.56	0.45	8.62	1.9	0.62	0.11	0.53	0.05	0.48	0.03	0.44	0.01	4.61	0.81	8.17	2.92	0.55	0.2	0.41	0.11	0.36	0.06	0.33	0.04	6.25	0.2	8.94	0.26	0.67	0.03	0.61	0.01	0.57	0	0.51	0
CascadeStereoFt	time_travellers_20	3.58	0.2	5.3	0.81	0.74	0.03	0.61	0.01	0.5	0.01	0.35	0.01	3.25	0.38	5.19	1.37	0.64	0.09	0.49	0.04	0.42	0.03	0.31	0.02	3.75	0.1	5.35	0.14	0.79	0.01	0.67	0	0.54	0	0.37	0
CascadeStereoFt	time_travellers_24	54.69	0.88	73.31	5.79	0.87	0.14	0.74	0.08	0.68	0.03	0.66	0.02	33.2	2.95	52.22	11.47	0.78	0.35	0.62	0.22	0.52	0.12	0.48	0.06	62	0.17	79.21	0.37	0.9	0.07	0.78	0.03	0.73	0	0.72	0
CascadeStereoFt	time_travellers_25	6.68	0.59	10.72	2.91	0.61	0.12	0.52	0.05	0.49	0.03	0.48	0.03	6.79	1.23	12.07	4.6	0.61	0.24	0.46	0.12	0.4	0.08	0.38	0.06	6.6	0.16	9.73	0.33	0.61	0.04	0.56	0.01	0.55	0	0.54	0
CascadeStereoFt	time_travellers_3	15.22	0.65	28.14	3.26	0.7	0.15	0.62	0.07	0.59	0.04	0.56	0.02	10.1	1.25	20.43	4.96	0.64	0.26	0.51	0.14	0.45	0.08	0.41	0.04	19.04	0.21	32.73	0.39	0.75	0.07	0.7	0.03	0.69	0.01	0.68	0
CascadeStereoFt	twirls2	1.04	0.2	2.03	0.35	0.41	0.04	0.23	0.01	0.15	0	0.08	0	1.2	0.27	2.2	0.51	0.48	0.09	0.26	0.03	0.17	0.01	0.09	0	0.94	0.16	1.9	0.19	0.36	0.01	0.2	0	0.14	0	0.06	0
CascadeStereoFt	twirls3	1.08	0.18	2.16	0.36	0.46	0.05	0.25	0.01	0.13	0.01	0.06	0	1.18	0.28	2.35	0.58	0.49	0.11	0.27	0.03	0.14	0.02	0.08	0.01	1.03	0.14	2.07	0.18	0.44	0.01	0.24	0	0.13	0	0.05	0
CascadeStereoFt	voronoid_sphere6	5.1	1.49	11.51	4.93	0.75	0.3	0.53	0.17	0.3	0.11	0.2	0.07	5.34	2.08	11.8	5.94	0.76	0.39	0.55	0.24	0.31	0.15	0.22	0.1	4.71	0.5	11	2.42	0.72	0.15	0.49	0.06	0.27	0.03	0.18	0.02
CascadeStereoFt	voronoid_sphere9	3.67	0.92	7.36	2.45	0.54	0.22	0.39	0.14	0.33	0.1	0.27	0.07	2.49	1.05	5.23	2.65	0.48	0.25	0.32	0.17	0.25	0.12	0.19	0.08	10.49	0.18	14.48	0.23	0.88	0.02	0.8	0	0.75	0	0.7	0
CascadeStereoFt	walker4	6.67	0.36	9.01	1.2	0.8	0.09	0.74	0.03	0.67	0.02	0.59	0.02	5.35	0.67	8.26	1.9	0.63	0.19	0.55	0.08	0.5	0.06	0.46	0.05	7.49	0.17	9.45	0.3	0.91	0.03	0.86	0	0.78	0	0.67	0
CascadeStereoFt	windmills4	1.1	0.17	3.15	0.33	0.54	0.03	0.28	0.01	0.1	0	0.03	0	1.58	0.3	4.86	0.62	0.55	0.11	0.32	0.03	0.18	0.02	0.04	0.01	0.96	0.13	2.47	0.17	0.54	0.01	0.27	0	0.08	0	0.02	0
CascadeStereoFt	youngster_room10	4.62	0.31	15.92	0.79	0.5	0.11	0.34	0.02	0.23	0.01	0.17	0	3.72	0.49	14.97	1.33	0.56	0.23	0.37	0.07	0.2	0.03	0.1	0.01	5.06	0.22	16.36	0.27	0.47	0.05	0.32	0	0.24	0	0.2	0
CascadeStereoFt	youngster_room14	5.91	0.55	9.19	1.4	0.68	0.22	0.57	0.11	0.46	0.05	0.39	0.03	4.11	0.9	7.09	2.04	0.65	0.34	0.49	0.19	0.37	0.09	0.29	0.05	6.87	0.37	10.14	0.9	0.7	0.15	0.61	0.07	0.52	0.03	0.45	0.01
CascadeStereoFt	youngster_room4	2.33	0.25	4.57	0.43	0.47	0.1	0.31	0.02	0.22	0.01	0.19	0	1.46	0.38	3.25	0.66	0.47	0.21	0.26	0.05	0.13	0.02	0.09	0	2.77	0.19	5.1	0.25	0.47	0.05	0.33	0	0.26	0	0.23	0
CascadeStereoFt	youngster_room7	2.91	0.28	5.23	0.65	0.59	0.11	0.39	0.04	0.26	0.02	0.23	0	2.46	0.49	4.63	1.01	0.57	0.23	0.37	0.1	0.23	0.06	0.19	0.01	3.14	0.17	5.51	0.34	0.6	0.04	0.41	0.01	0.28	0.01	0.25	0
CascadeStereoFt	youngster_room9	3.24	0.22	5.65	0.49	0.64	0.07	0.4	0.02	0.28	0.01	0.25	0	1.28	0.38	2.88	0.82	0.45	0.17	0.24	0.06	0.12	0.02	0.08	0.01	4.07	0.15	6.49	0.23	0.73	0.02	0.46	0.01	0.34	0	0.32	0
CascadeStereoFt	dining_room_1_13	2.31	0.22	3.93	0.47	0.64	0.09	0.42	0.04	0.27	0.01	0.22	0	1.54	0.39	3.1	0.71	0.6	0.2	0.36	0.1	0.19	0.03	0.09	0	2.78	0.12	4.36	0.21	0.67	0.01	0.46	0.01	0.32	0	0.29	0
CascadeStereoFt	living_room_3_2	1.86	0.23	3.47	0.66	0.44	0.04	0.27	0.02	0.22	0.01	0.2	0.01	1.75	0.49	3.42	1.35	0.5	0.13	0.26	0.06	0.17	0.04	0.16	0.04	1.89	0.15	3.48	0.2	0.43	0.01	0.27	0	0.23	0	0.22	0
CascadeStereoFt	office_top4	1.59	0.15	3.03	0.24	0.36	0.04	0.25	0.01	0.2	0	0.18	0	1.36	0.25	2.71	0.37	0.41	0.11	0.23	0.02	0.15	0	0.13	0	1.69	0.11	3.17	0.14	0.34	0	0.25	0	0.22	0	0.2	0
CascadeStereoFt	sleeping_room_1_13	3.72	0.15	6.08	0.33	0.62	0.03	0.42	0	0.34	0	0.32	0	2.67	0.24	5.05	0.61	0.62	0.11	0.35	0.02	0.23	0.01	0.2	0	4.09	0.11	6.39	0.15	0.63	0.01	0.44	0	0.38	0	0.36	0
CascadeStereoFt	dining_room_1_5	2.57	0.62	4.86	1.65	0.66	0.22	0.43	0.11	0.28	0.06	0.22	0.03	2.18	1.01	4.36	2.3	0.67	0.37	0.44	0.2	0.23	0.11	0.14	0.06	2.94	0.25	5.3	0.51	0.64	0.08	0.42	0.03	0.32	0.02	0.3	0
CascadeStereoFt	dining_room_1_7	5.39	0.93	8.47	3.35	0.75	0.25	0.6	0.12	0.45	0.06	0.38	0.04	4.82	1.53	8.61	4.55	0.76	0.39	0.57	0.22	0.38	0.11	0.29	0.07	6.04	0.23	8.31	0.58	0.74	0.1	0.63	0.02	0.53	0	0.5	0
CascadeStereoFt	dining_room_1_9	2.46	0.32	5.06	0.9	0.46	0.12	0.25	0.05	0.19	0.02	0.17	0.01	2.12	0.5	4.44	1.23	0.51	0.22	0.28	0.1	0.18	0.04	0.15	0.02	2.83	0.12	5.66	0.16	0.4	0.01	0.22	0	0.21	0	0.21	0
CascadeStereoFt	floating_cubes1	4.24	0.27	5.79	0.69	0.74	0.09	0.61	0.02	0.55	0.01	0.47	0.01	3.74	0.38	5.26	1	0.75	0.13	0.59	0.04	0.51	0.03	0.43	0.02	4.62	0.18	6.17	0.25	0.74	0.05	0.63	0	0.57	0	0.51	0
CascadeStereoFt	fruit1	2.07	0.24	4	0.37	0.53	0.07	0.34	0.02	0.23	0	0.16	0	2.19	0.32	3.98	0.53	0.61	0.15	0.43	0.05	0.26	0.01	0.16	0	2	0.19	4	0.24	0.48	0.03	0.29	0	0.21	0	0.16	0
CascadeStereoFt	fruit6	2.91	0.28	7.2	0.82	0.52	0.09	0.29	0.03	0.17	0.02	0.14	0.01	3.21	0.57	6.84	1.48	0.63	0.23	0.43	0.1	0.29	0.06	0.2	0.03	2.79	0.16	7.34	0.24	0.48	0.04	0.23	0.01	0.13	0	0.11	0
CascadeStereoFt	fruit8	5.81	0.16	10.33	0.33	0.65	0.04	0.41	0.01	0.31	0	0.28	0	4.44	0.26	8.52	0.54	0.68	0.1	0.47	0.03	0.29	0.01	0.21	0	6.45	0.12	11.07	0.16	0.64	0.01	0.38	0	0.31	0	0.31	0
CascadeStereoFt	hacienda1	0.97	0.3	1.44	0.55	0.61	0.13	0.33	0.03	0.1	0.01	0.03	0	0.78	0.38	1.26	0.72	0.45	0.19	0.22	0.05	0.1	0.02	0.02	0	1.17	0.22	1.61	0.27	0.79	0.06	0.45	0	0.1	0	0.04	0
CascadeStereoFt	hacienda4	0.51	0.24	0.72	0.5	0.42	0.09	0.1	0.02	0	0	0	0	0.51	0.3	0.8	0.65	0.37	0.15	0.12	0.05	0.01	0.01	0	0	0.52	0.18	0.61	0.23	0.48	0.03	0.08	0	0	0	0	0
CascadeStereoFt	hacienda8	0.5	0.31	2.39	0.42	0.24	0.24	0.03	0.01	0.01	0	0.01	0	0.44	0.31	0.59	0.44	0.34	0.2	0.07	0.01	0	0	0	0	0.52	0.3	2.78	0.42	0.2	0.25	0.02	0.01	0.01	0	0.01	0
CascadeStereoFt	landscape1_5	1.03	0.66	4.25	2.41	0.27	0.22	0.11	0.09	0.06	0.05	0.04	0.02	1.32	1.02	4.93	3.69	0.36	0.28	0.15	0.12	0.08	0.08	0.05	0.05	0.84	0.43	3.75	0.86	0.22	0.18	0.08	0.06	0.05	0.04	0.03	0.01
CascadeStereoFt	landscape1_6	0.64	0.4	1.75	1.35	0.38	0.14	0.1	0.06	0.04	0.03	0.02	0.01	0.86	0.58	2.37	1.94	0.45	0.21	0.15	0.09	0.05	0.05	0.03	0.02	0.46	0.25	0.99	0.46	0.32	0.08	0.06	0.04	0.02	0.01	0	0
CascadeStereoFt	landscape3_2	0.46	0.42	2.36	2.04	0.13	0.14	0.05	0.04	0.02	0.02	0.01	0.01	0.77	0.66	3.63	3.12	0.23	0.23	0.09	0.08	0.04	0.03	0.02	0.02	0.23	0.24	0.39	0.45	0.07	0.08	0.02	0.02	0.01	0.01	0	0
CascadeStereoFt	landscape5_2	3.66	0.26	5.62	0.34	0.61	0.11	0.47	0.02	0.4	0	0.36	0	1.99	0.37	4.26	0.48	0.53	0.25	0.29	0.06	0.17	0	0.14	0	4	0.24	5.86	0.31	0.63	0.08	0.51	0.01	0.45	0	0.41	0
CascadeStereoFt	living_room_1_1	1.78	0.33	3.52	0.75	0.57	0.13	0.35	0.07	0.18	0.03	0.11	0.01	1.65	0.5	3.29	1.01	0.52	0.22	0.35	0.12	0.21	0.06	0.1	0.02	1.92	0.14	3.77	0.22	0.63	0.02	0.36	0.01	0.15	0	0.13	0
CascadeStereoFt	living_room_2_3	0.74	0.13	1.57	0.19	0.36	0.02	0.12	0	0.06	0	0.04	0	1.19	0.19	2.2	0.3	0.53	0.07	0.24	0.01	0.13	0	0.09	0	0.63	0.11	1.37	0.14	0.32	0	0.09	0	0.04	0	0.03	0
CascadeStereoFtStage2	abstract_bowls_1	6.11	0.29	11.2	0.94	0.67	0.1	0.49	0.03	0.38	0.01	0.32	0.01	2.88	0.46	6.72	1.37	0.59	0.19	0.36	0.06	0.23	0.03	0.16	0.02	8.9	0.15	13.96	0.21	0.74	0.03	0.6	0	0.51	0	0.45	0
CascadeStereoFtStage2	abstract_bowls_14	10.89	0.28	17.44	0.74	0.77	0.09	0.64	0.03	0.55	0.02	0.52	0.01	6.42	0.44	13.74	1.12	0.66	0.17	0.46	0.06	0.35	0.03	0.3	0.02	13.6	0.18	19.34	0.35	0.84	0.04	0.74	0.01	0.68	0.01	0.65	0
CascadeStereoFtStage2	bones_3	2.67	1.77	6.92	6.11	0.62	0.29	0.34	0.15	0.19	0.1	0.11	0.06	3.37	2.44	8.2	7.33	0.65	0.39	0.38	0.22	0.22	0.14	0.14	0.09	1.13	0.3	2.34	1.24	0.57	0.07	0.24	0.01	0.14	0	0.04	0
CascadeStereoFtStage2	bones_6	3.1	1.95	8.34	6.31	0.61	0.41	0.37	0.21	0.2	0.11	0.12	0.07	3.63	2.39	9.34	7.1	0.61	0.48	0.38	0.26	0.21	0.14	0.14	0.09	1.12	0.32	1.89	0.52	0.59	0.18	0.34	0.03	0.15	0	0.04	0
CascadeStereoFtStage2	Chairs4	1.99	0.68	3.3	1.78	0.66	0.26	0.43	0.11	0.29	0.06	0.18	0.04	2.24	0.8	3.56	1.99	0.72	0.3	0.49	0.14	0.34	0.08	0.21	0.05	1.19	0.3	2.29	0.81	0.48	0.11	0.24	0.01	0.15	0	0.09	0
CascadeStereoFtStage2	chess_8	1.58	0.33	2.98	0.81	0.55	0.14	0.28	0.04	0.18	0.02	0.14	0.01	1.66	0.46	3.13	1.12	0.56	0.21	0.29	0.07	0.19	0.03	0.14	0.02	1.5	0.2	2.82	0.29	0.54	0.07	0.27	0.01	0.18	0	0.13	0
CascadeStereoFtStage2	childroom_1	3.09	0.19	6.12	0.57	0.57	0.05	0.31	0.01	0.21	0.01	0.2	0	1.78	0.31	4.29	0.87	0.51	0.1	0.26	0.03	0.13	0.02	0.09	0.01	4.01	0.11	7.14	0.14	0.62	0	0.35	0	0.27	0	0.27	0
CascadeStereoFtStage2	childroom_12	3.98	0.36	7.81	1.34	0.61	0.12	0.38	0.04	0.27	0.02	0.23	0.01	2.74	0.56	6.73	1.89	0.55	0.22	0.27	0.07	0.16	0.03	0.13	0.02	5.19	0.17	8.75	0.24	0.67	0.03	0.49	0	0.38	0	0.32	0
CascadeStereoFtStage2	childroom_2	1.53	0.56	4.3	2.53	0.41	0.18	0.24	0.09	0.13	0.05	0.09	0.02	1.85	0.92	5.32	3.61	0.51	0.29	0.32	0.15	0.16	0.08	0.1	0.04	1.23	0.23	3.07	0.5	0.31	0.07	0.16	0.03	0.1	0.01	0.08	0
CascadeStereoFtStage2	childroom_4	0.43	0.2	0.73	0.58	0.31	0.06	0.05	0.01	0.01	0	0	0	0.51	0.28	0.93	0.8	0.39	0.12	0.09	0.03	0.01	0.01	0	0	0.35	0.12	0.45	0.17	0.22	0.01	0.02	0	0	0	0	0
CascadeStereoFtStage2	childroom_6	2.29	0.23	4.94	0.7	0.46	0.06	0.24	0.02	0.18	0.01	0.16	0.01	1.76	0.34	3.99	1.02	0.48	0.11	0.22	0.04	0.15	0.02	0.12	0.01	2.74	0.13	5.62	0.18	0.44	0.01	0.25	0	0.21	0	0.19	0
CascadeStereoFtStage2	childroom_9	0.61	0.27	1.73	1.09	0.3	0.07	0.06	0.02	0.03	0.01	0.02	0.01	0.86	0.49	2.36	1.79	0.38	0.15	0.12	0.06	0.06	0.03	0.04	0.02	0.48	0.14	1.24	0.2	0.25	0.02	0.03	0	0.02	0	0.01	0
CascadeStereoFtStage2	cloth4	1.43	0.22	3.12	0.35	0.59	0.11	0.33	0.03	0.13	0	0.06	0	1.59	0.3	3.51	0.43	0.64	0.17	0.41	0.05	0.16	0	0.05	0	1.38	0.2	3.01	0.32	0.58	0.1	0.31	0.02	0.12	0	0.06	0
CascadeStereoFtStage2	cloth6	1.7	0.23	3.38	0.44	0.59	0.09	0.35	0.01	0.18	0	0.11	0	1.55	0.33	3.13	0.69	0.59	0.17	0.36	0.04	0.16	0.01	0.08	0.01	1.78	0.18	3.49	0.24	0.59	0.05	0.35	0	0.19	0	0.12	0
CascadeStereoFtStage2	cloth7	4.86	0.43	7.54	1.79	0.72	0.17	0.52	0.04	0.42	0.01	0.37	0.01	3.19	0.7	5.95	2.49	0.64	0.28	0.37	0.09	0.27	0.03	0.22	0.02	6.26	0.21	8.66	0.84	0.79	0.08	0.65	0.01	0.55	0	0.5	0
CascadeStereoFtStage2	coral6	3.84	0.22	6.03	0.72	0.67	0.05	0.5	0.02	0.4	0.01	0.34	0.01	3.62	0.39	5.45	1.14	0.75	0.13	0.59	0.06	0.44	0.03	0.33	0.02	3.98	0.12	6.36	0.16	0.61	0.01	0.44	0	0.37	0	0.34	0
CascadeStereoFtStage2	dining_room_1_1	3.11	1.41	7.5	5.32	0.64	0.3	0.44	0.16	0.27	0.09	0.19	0.05	4.31	2.22	9.49	6.93	0.74	0.43	0.52	0.24	0.33	0.15	0.23	0.09	1.38	0.26	2.85	0.44	0.5	0.11	0.33	0.03	0.18	0.01	0.12	0
CascadeStereoFtStage2	office_top5	3.78	0.18	6.08	0.41	0.74	0.05	0.5	0.01	0.34	0.01	0.3	0	2	0.29	3.83	0.65	0.68	0.12	0.36	0.03	0.19	0.01	0.14	0.01	4.73	0.12	6.99	0.17	0.77	0.01	0.58	0	0.41	0	0.38	0
CascadeStereoFtStage2	park1	0.32	0.25	0.6	0.57	0.15	0.09	0.04	0.04	0.02	0.02	0	0	0.4	0.38	0.79	0.79	0.2	0.17	0.08	0.08	0.03	0.03	0.01	0.01	0.24	0.12	0.3	0.15	0.09	0.01	0	0	0	0	0	0
CascadeStereoFtStage2	park10	0.88	0.76	2.05	2.09	0.4	0.25	0.15	0.13	0.08	0.08	0.04	0.05	1.14	1.1	2.53	2.6	0.46	0.38	0.22	0.2	0.12	0.12	0.07	0.07	0.41	0.13	0.48	0.19	0.31	0.02	0.02	0	0	0	0	0
CascadeStereoFtStage2	park6	0.84	0.86	2.89	3.8	0.3	0.15	0.13	0.08	0.05	0.05	0.03	0.04	1.66	2.23	4.83	6.55	0.48	0.37	0.25	0.22	0.12	0.15	0.07	0.11	0.42	0.16	0.87	0.23	0.22	0.04	0.07	0.01	0.02	0	0.01	0
CascadeStereoFtStage2	person1_1	23.94	0.25	45.18	1.39	0.76	0.07	0.58	0.02	0.51	0	0.46	0	13.69	0.62	31.64	2.81	0.7	0.16	0.47	0.05	0.38	0.02	0.33	0.02	27.19	0.14	48.69	0.21	0.78	0.04	0.61	0	0.55	0	0.5	0
CascadeStereoFtStage2	person1_3	1.58	0.58	5.39	3.42	0.5	0.16	0.25	0.06	0.11	0.03	0.06	0.01	2.73	1.26	8.31	5.76	0.61	0.32	0.38	0.14	0.21	0.07	0.11	0.04	0.97	0.21	2.78	0.43	0.44	0.08	0.18	0.02	0.06	0.01	0.03	0
CascadeStereoFtStage2	person1_8	13.83	0.25	29.92	0.72	0.84	0.05	0.63	0.02	0.46	0	0.43	0	11.92	0.41	28.45	1.53	0.75	0.1	0.5	0.05	0.39	0.02	0.36	0.01	14.3	0.21	30.27	0.27	0.86	0.04	0.66	0.01	0.48	0	0.45	0
CascadeStereoFtStage2	person2_5	1.34	0.17	2.37	0.49	0.55	0.03	0.3	0.01	0.18	0	0.11	0	1.2	0.26	2.25	0.8	0.5	0.08	0.27	0.03	0.14	0.01	0.09	0.01	1.42	0.11	2.43	0.14	0.57	0	0.32	0	0.2	0	0.12	0
CascadeStereoFtStage2	person3_10	1.54	0.22	3.88	0.74	0.4	0.06	0.25	0.03	0.15	0.01	0.11	0	1.63	0.43	3.29	1.37	0.51	0.16	0.32	0.08	0.19	0.03	0.12	0.01	1.51	0.14	4.07	0.22	0.36	0.02	0.22	0.01	0.14	0	0.1	0
CascadeStereoFtStage2	person3_3	1.69	0.23	3.27	0.82	0.53	0.07	0.36	0.02	0.24	0	0.13	0	2.12	0.44	4.5	1.58	0.52	0.16	0.33	0.05	0.23	0.02	0.15	0.01	1.55	0.15	2.73	0.24	0.54	0.04	0.36	0.01	0.24	0	0.13	0
CascadeStereoFtStage2	person3_4	1.62	0.37	4.63	1.83	0.33	0.07	0.17	0.02	0.12	0.01	0.09	0.01	2.43	0.75	6.39	3.02	0.43	0.15	0.23	0.06	0.15	0.04	0.12	0.03	1.16	0.15	3.24	0.2	0.28	0.02	0.14	0	0.1	0	0.08	0
CascadeStereoFtStage2	plant_vintage12	2.4	0.77	4.78	2.47	0.66	0.21	0.37	0.11	0.22	0.07	0.16	0.04	2.28	1.11	4.71	3.08	0.63	0.3	0.36	0.17	0.21	0.1	0.15	0.07	2.61	0.18	4.91	0.27	0.7	0.04	0.38	0.01	0.23	0	0.19	0
CascadeStereoFtStage2	plant_vintage14	10.48	0.2	13.28	0.34	0.82	0.04	0.73	0.01	0.65	0.01	0.63	0	4.84	0.29	8.43	0.56	0.64	0.12	0.48	0.05	0.34	0.02	0.3	0	12.78	0.16	14.81	0.2	0.89	0.01	0.83	0	0.77	0	0.77	0
CascadeStereoFtStage2	plant_vintage15	10.07	0.2	13.4	0.36	0.83	0.04	0.66	0.02	0.6	0.01	0.57	0	4.29	0.3	8.27	0.6	0.66	0.12	0.41	0.05	0.29	0.03	0.23	0	12.64	0.15	15.13	0.18	0.91	0	0.77	0	0.74	0	0.73	0
CascadeStereoFtStage2	plant_vintage2	1.92	0.21	3.32	0.3	0.53	0.06	0.34	0.01	0.23	0	0.21	0	1.55	0.29	2.87	0.43	0.51	0.14	0.31	0.03	0.17	0	0.14	0	2.13	0.17	3.56	0.2	0.54	0.02	0.36	0	0.27	0	0.24	0
CascadeStereoFtStage2	plant_vintage4	2.29	0.23	4.26	0.46	0.47	0.06	0.32	0.02	0.26	0.01	0.22	0	1.53	0.39	3.41	0.72	0.41	0.17	0.25	0.06	0.16	0.03	0.11	0.01	2.74	0.13	4.69	0.16	0.5	0	0.36	0	0.32	0	0.29	0
CascadeStereoFtStage2	plant_vintage7	1.92	0.57	3.76	1.83	0.58	0.19	0.28	0.08	0.19	0.04	0.16	0.03	1.73	0.9	3.61	2.48	0.53	0.3	0.26	0.14	0.17	0.08	0.14	0.06	2.14	0.17	3.93	0.25	0.64	0.05	0.3	0.01	0.21	0	0.18	0
CascadeStereoFtStage2	roundntwist4	1.45	0.32	2.73	0.51	0.63	0.13	0.41	0.05	0.17	0.01	0.07	0	1.22	0.4	2.31	0.64	0.56	0.2	0.34	0.08	0.17	0.02	0.04	0	1.81	0.2	3.26	0.23	0.73	0.01	0.5	0	0.18	0	0.1	0
CascadeStereoFtStage2	ScifiKnot1	1.54	0.2	3	0.48	0.53	0.05	0.3	0.02	0.19	0.01	0.13	0	1.68	0.31	2.86	0.75	0.62	0.11	0.37	0.04	0.24	0.02	0.15	0.01	1.46	0.13	3.09	0.17	0.48	0.01	0.26	0	0.16	0	0.11	0
CascadeStereoFtStage2	ScifiKnot4	5.74	0.46	14.93	1.79	0.84	0.14	0.72	0.06	0.47	0.03	0.25	0.02	4.99	1.24	10.54	3.51	0.83	0.34	0.68	0.18	0.46	0.1	0.26	0.06	6	0.2	16.16	0.32	0.85	0.07	0.73	0.02	0.48	0	0.24	0
CascadeStereoFtStage2	sleeping_room_1_11	2.53	0.32	7.46	0.55	0.6	0.16	0.26	0.03	0.15	0.01	0.11	0	2.33	0.5	6.74	0.92	0.6	0.31	0.28	0.09	0.16	0.02	0.11	0.01	2.61	0.25	7.71	0.33	0.6	0.11	0.25	0.01	0.14	0	0.12	0
CascadeStereoFtStage2	living_room_3_5	1.38	0.9	3.48	3.15	0.47	0.21	0.18	0.12	0.1	0.07	0.07	0.05	1.9	0.91	4.36	3.05	0.53	0.28	0.26	0.14	0.16	0.07	0.11	0.04	0.92	0.9	2.44	3.23	0.41	0.16	0.11	0.1	0.06	0.07	0.04	0.06
CascadeStereoFtStage2	living_room_3_9	1.08	0.17	2.39	0.37	0.33	0.03	0.17	0.01	0.1	0	0.09	0	0.9	0.25	2.06	0.59	0.36	0.09	0.17	0.03	0.07	0.01	0.05	0	1.17	0.13	2.54	0.17	0.32	0.01	0.18	0	0.12	0	0.1	0
CascadeStereoFtStage2	mannequins_10	2.61	1.48	7.18	5.32	0.56	0.29	0.37	0.17	0.24	0.11	0.13	0.07	3.46	2.1	8.73	6.54	0.64	0.41	0.44	0.25	0.3	0.16	0.17	0.1	1.13	0.4	2.95	1.76	0.43	0.09	0.24	0.03	0.13	0.02	0.06	0.02
CascadeStereoFtStage2	mannequins_12	5.03	0.5	8.95	2	0.64	0.13	0.5	0.05	0.43	0.03	0.37	0.02	3.73	0.83	7.37	2.83	0.56	0.22	0.39	0.1	0.3	0.05	0.25	0.04	6.3	0.18	10.26	0.23	0.72	0.03	0.61	0	0.55	0	0.49	0
CascadeStereoFtStage2	mannequins_2	3.03	0.84	5.8	3.45	0.6	0.17	0.42	0.09	0.31	0.06	0.22	0.04	2.53	1.18	5.57	4.19	0.55	0.24	0.35	0.13	0.24	0.08	0.16	0.05	4.03	0.18	6.23	0.87	0.7	0.03	0.54	0	0.46	0	0.36	0
CascadeStereoFtStage2	mannequins_5	1.56	0.36	3.11	0.9	0.59	0.14	0.38	0.06	0.16	0.03	0.09	0.01	1.37	0.46	2.78	1.12	0.51	0.2	0.32	0.09	0.15	0.04	0.08	0.02	1.84	0.21	3.53	0.44	0.7	0.05	0.45	0.03	0.16	0.02	0.09	0
CascadeStereoFtStage2	mannequins_9	1.31	0.49	2.48	1.56	0.5	0.17	0.31	0.07	0.19	0.04	0.08	0.02	1.29	0.64	2.55	1.88	0.52	0.23	0.31	0.1	0.18	0.05	0.07	0.03	1.35	0.17	2.33	0.24	0.45	0.04	0.31	0.01	0.23	0	0.12	0
CascadeStereoFtStage2	Minicubes4	5.03	0.69	7.78	2.28	0.75	0.19	0.59	0.08	0.47	0.05	0.38	0.04	4.07	0.95	6.85	2.82	0.72	0.26	0.53	0.12	0.4	0.08	0.3	0.06	6.83	0.19	9.27	0.27	0.82	0.06	0.71	0.01	0.61	0	0.53	0
CascadeStereoFtStage2	Minicubes5	3.31	0.4	5.44	1.11	0.66	0.13	0.48	0.05	0.38	0.03	0.31	0.02	2.71	0.54	4.82	1.43	0.64	0.2	0.44	0.09	0.32	0.05	0.23	0.03	4.16	0.2	6.22	0.26	0.7	0.05	0.55	0	0.47	0	0.42	0
CascadeStereoFtStage2	Minicubes9	7.07	0.34	10.42	1.07	0.78	0.1	0.64	0.05	0.54	0.03	0.47	0.02	4.03	0.51	7.27	1.42	0.69	0.16	0.51	0.08	0.37	0.05	0.27	0.03	10.96	0.13	13.4	0.21	0.9	0.03	0.81	0.01	0.75	0	0.72	0
CascadeStereoFtStage2	moto3	1.51	0.26	2.71	0.49	0.6	0.09	0.35	0.02	0.2	0.01	0.11	0	1.44	0.37	2.41	0.69	0.62	0.18	0.38	0.05	0.21	0.03	0.1	0	1.56	0.17	2.93	0.21	0.59	0.02	0.32	0	0.19	0	0.12	0
CascadeStereoFtStage2	music1_1	5.46	0.36	12.59	0.89	0.45	0.13	0.34	0.06	0.27	0.02	0.23	0.01	4.68	0.62	12.92	1.43	0.44	0.25	0.31	0.13	0.21	0.06	0.16	0.03	5.85	0.22	12.42	0.4	0.46	0.07	0.35	0.02	0.3	0	0.26	0
CascadeStereoFtStage2	music1_6	2.56	1	8.22	3.16	0.53	0.25	0.33	0.15	0.22	0.09	0.14	0.06	3.12	1.49	9.45	4.03	0.57	0.37	0.38	0.22	0.25	0.14	0.17	0.09	1.73	0.29	5.96	0.91	0.47	0.08	0.25	0.04	0.16	0.02	0.1	0.01
CascadeStereoFtStage2	music1_7	0.92	0.22	1.98	0.57	0.38	0.06	0.18	0.02	0.11	0.01	0.06	0.01	1.07	0.45	2.16	1	0.42	0.17	0.25	0.08	0.15	0.05	0.07	0.02	0.85	0.12	1.89	0.16	0.36	0.01	0.15	0	0.09	0	0.06	0
CascadeStereoFtStage2	music1_9	7.74	0.33	12.51	1.01	0.73	0.11	0.61	0.05	0.51	0.02	0.45	0.01	6.05	0.77	12.66	1.94	0.56	0.28	0.39	0.15	0.27	0.08	0.23	0.04	8.22	0.21	12.47	0.51	0.77	0.06	0.67	0.03	0.58	0.01	0.51	0
CascadeStereoFtStage2	nest5	4.1	3.04	18.85	18.66	0.7	0.33	0.47	0.22	0.27	0.15	0.19	0.11	5.37	4.26	23.8	23.65	0.74	0.46	0.52	0.31	0.34	0.21	0.24	0.15	2.59	1.6	10.18	9.82	0.64	0.19	0.42	0.11	0.2	0.08	0.12	0.07
CascadeStereoFtStage2	office1	2.15	0.18	3.89	0.27	0.51	0.04	0.33	0.01	0.24	0	0.2	0	1.05	0.25	2.14	0.39	0.47	0.11	0.23	0.02	0.1	0.01	0.06	0	2.77	0.14	4.58	0.18	0.53	0.01	0.39	0	0.32	0	0.28	0
CascadeStereoFtStage2	office12	3.14	0.55	5.78	2.06	0.73	0.13	0.59	0.06	0.38	0.04	0.22	0.03	4.05	1.04	6.8	3.12	0.82	0.25	0.69	0.13	0.47	0.09	0.28	0.06	2.66	0.29	5.16	1.15	0.68	0.06	0.53	0.03	0.33	0.02	0.19	0.02
CascadeStereoFtStage2	office14	4.24	0.49	14.18	1.97	0.41	0.14	0.25	0.08	0.17	0.04	0.13	0.02	3.47	0.92	9.83	3.03	0.52	0.25	0.31	0.15	0.2	0.1	0.16	0.05	4.79	0.19	16.59	0.36	0.33	0.07	0.21	0.03	0.14	0	0.12	0
CascadeStereoFtStage2	office2	1.76	0.19	3.2	0.25	0.47	0.04	0.26	0	0.21	0	0.2	0	1.02	0.25	2	0.35	0.47	0.12	0.2	0.01	0.09	0	0.08	0	2.03	0.17	3.54	0.21	0.46	0.01	0.28	0	0.25	0	0.24	0
CascadeStereoFtStage2	sleeping_room_1_15	9.66	0.21	21.87	0.37	0.65	0.06	0.51	0.02	0.43	0.01	0.38	0	6.28	0.28	15.55	0.52	0.61	0.12	0.44	0.04	0.34	0.01	0.28	0	12.31	0.15	25.76	0.18	0.69	0.01	0.57	0	0.5	0	0.45	0
CascadeStereoFtStage2	sleeping_room_1_3	1.51	0.14	3.17	0.21	0.46	0.02	0.22	0	0.14	0	0.13	0	1.95	0.2	3.77	0.32	0.52	0.08	0.28	0.01	0.19	0	0.17	0	1.36	0.11	2.95	0.15	0.44	0	0.2	0	0.12	0	0.11	0
CascadeStereoFtStage2	sleeping_room_1_7	3.01	0.19	5.24	0.34	0.58	0.06	0.37	0.01	0.27	0	0.26	0	3.22	0.26	5.36	0.5	0.61	0.1	0.41	0.02	0.32	0.01	0.29	0	2.92	0.17	5.19	0.23	0.56	0.05	0.36	0	0.25	0	0.24	0
CascadeStereoFtStage2	spaceStation2	0.72	0.66	2.54	2.35	0.16	0.14	0.07	0.06	0.05	0.05	0.03	0.03	1.53	1.4	4.24	3.93	0.36	0.32	0.17	0.15	0.12	0.11	0.09	0.08	0.3	0.28	0.79	0.71	0.06	0.05	0.02	0.02	0.02	0.02	0.01	0
CascadeStereoFtStage2	stack_circles4	11.33	0.3	16.78	1.18	0.83	0.09	0.66	0.03	0.59	0.01	0.57	0.01	7.51	0.56	13.84	1.94	0.77	0.2	0.56	0.07	0.43	0.03	0.38	0.02	13.47	0.16	18.21	0.22	0.87	0.04	0.73	0	0.68	0	0.67	0
CascadeStereoFtStage2	stack_circles9	11.16	0.29	26.02	1.04	0.71	0.09	0.59	0.04	0.52	0.01	0.46	0.01	6.47	0.5	20.63	1.64	0.56	0.18	0.4	0.07	0.32	0.03	0.27	0.02	14.12	0.17	28.91	0.3	0.8	0.04	0.72	0.02	0.64	0.01	0.58	0
CascadeStereoFtStage2	time_travellers_10	20.92	1.54	31.27	7.78	0.72	0.17	0.62	0.09	0.57	0.05	0.55	0.04	19.65	4.28	31.11	13.55	0.72	0.38	0.58	0.24	0.48	0.14	0.44	0.1	21.44	0.43	31.33	3.23	0.72	0.08	0.64	0.03	0.61	0.01	0.6	0.01
CascadeStereoFtStage2	time_travellers_13	4.92	0.33	8.58	1.53	0.7	0.08	0.58	0.02	0.5	0.01	0.4	0.01	4.66	0.62	8.45	2.39	0.6	0.14	0.46	0.06	0.39	0.04	0.35	0.03	5.1	0.13	8.67	0.2	0.76	0.03	0.67	0	0.57	0	0.43	0
CascadeStereoFtStage2	time_travellers_15	8.72	0.86	12.69	4.28	0.7	0.14	0.59	0.06	0.56	0.03	0.54	0.02	7.75	1.89	13.26	6.77	0.63	0.29	0.46	0.15	0.4	0.09	0.37	0.06	9.28	0.27	12.36	1.56	0.74	0.06	0.66	0.01	0.65	0.01	0.64	0
CascadeStereoFtStage2	time_travellers_2	5.56	0.45	8.62	1.9	0.62	0.11	0.53	0.05	0.48	0.03	0.44	0.01	4.61	0.81	8.17	2.92	0.55	0.2	0.41	0.11	0.36	0.06	0.33	0.04	6.25	0.2	8.94	0.26	0.67	0.03	0.61	0.01	0.57	0	0.51	0
CascadeStereoFtStage2	time_travellers_20	3.58	0.2	5.3	0.81	0.74	0.03	0.61	0.01	0.5	0.01	0.35	0.01	3.25	0.38	5.19	1.37	0.64	0.09	0.49	0.04	0.42	0.03	0.31	0.02	3.75	0.1	5.35	0.14	0.79	0.01	0.67	0	0.54	0	0.37	0
CascadeStereoFtStage2	time_travellers_24	54.69	0.88	73.31	5.79	0.87	0.14	0.74	0.08	0.68	0.03	0.66	0.02	33.2	2.95	52.22	11.47	0.78	0.35	0.62	0.22	0.52	0.12	0.48	0.06	62	0.17	79.21	0.37	0.9	0.07	0.78	0.03	0.73	0	0.72	0
CascadeStereoFtStage2	time_travellers_25	6.68	0.59	10.72	2.91	0.61	0.12	0.52	0.05	0.49	0.03	0.48	0.03	6.79	1.23	12.07	4.6	0.61	0.24	0.46	0.12	0.4	0.08	0.38	0.06	6.6	0.16	9.73	0.33	0.61	0.04	0.56	0.01	0.55	0	0.54	0
CascadeStereoFtStage2	time_travellers_3	15.22	0.65	28.14	3.26	0.7	0.15	0.62	0.07	0.59	0.04	0.56	0.02	10.1	1.25	20.43	4.96	0.64	0.26	0.51	0.14	0.45	0.08	0.41	0.04	19.04	0.21	32.73	0.39	0.75	0.07	0.7	0.03	0.69	0.01	0.68	0
CascadeStereoFtStage2	twirls2	1.04	0.2	2.03	0.35	0.41	0.04	0.23	0.01	0.15	0	0.08	0	1.2	0.27	2.2	0.51	0.48	0.09	0.26	0.03	0.17	0.01	0.09	0	0.94	0.16	1.9	0.19	0.36	0.01	0.2	0	0.14	0	0.06	0
CascadeStereoFtStage2	twirls3	1.08	0.18	2.16	0.36	0.46	0.05	0.25	0.01	0.13	0.01	0.06	0	1.18	0.28	2.35	0.58	0.49	0.11	0.27	0.03	0.14	0.02	0.08	0.01	1.03	0.14	2.07	0.18	0.44	0.01	0.24	0	0.13	0	0.05	0
CascadeStereoFtStage2	voronoid_sphere6	5.1	1.49	11.51	4.93	0.75	0.3	0.53	0.17	0.3	0.11	0.2	0.07	5.34	2.08	11.8	5.94	0.76	0.39	0.55	0.24	0.31	0.15	0.22	0.1	4.71	0.5	11	2.42	0.72	0.15	0.49	0.06	0.27	0.03	0.18	0.02
CascadeStereoFtStage2	voronoid_sphere9	3.67	0.92	7.36	2.45	0.54	0.22	0.39	0.14	0.33	0.1	0.27	0.07	2.49	1.05	5.23	2.65	0.48	0.25	0.32	0.17	0.25	0.12	0.19	0.08	10.49	0.18	14.48	0.23	0.88	0.02	0.8	0	0.75	0	0.7	0
CascadeStereoFtStage2	walker4	6.67	0.36	9.01	1.2	0.8	0.09	0.74	0.03	0.67	0.02	0.59	0.02	5.35	0.67	8.26	1.9	0.63	0.19	0.55	0.08	0.5	0.06	0.46	0.05	7.49	0.17	9.45	0.3	0.91	0.03	0.86	0	0.78	0	0.67	0
CascadeStereoFtStage2	windmills4	1.1	0.17	3.15	0.33	0.54	0.03	0.28	0.01	0.1	0	0.03	0	1.58	0.3	4.86	0.62	0.55	0.11	0.32	0.03	0.18	0.02	0.04	0.01	0.96	0.13	2.47	0.17	0.54	0.01	0.27	0	0.08	0	0.02	0
CascadeStereoFtStage2	youngster_room10	4.62	0.31	15.92	0.79	0.5	0.11	0.34	0.02	0.23	0.01	0.17	0	3.72	0.49	14.97	1.33	0.56	0.23	0.37	0.07	0.2	0.03	0.1	0.01	5.06	0.22	16.36	0.27	0.47	0.05	0.32	0	0.24	0	0.2	0
CascadeStereoFtStage2	youngster_room14	5.91	0.55	9.19	1.4	0.68	0.22	0.57	0.11	0.46	0.05	0.39	0.03	4.11	0.9	7.09	2.04	0.65	0.34	0.49	0.19	0.37	0.09	0.29	0.05	6.87	0.37	10.14	0.9	0.7	0.15	0.61	0.07	0.52	0.03	0.45	0.01
CascadeStereoFtStage2	youngster_room4	2.33	0.25	4.57	0.43	0.47	0.1	0.31	0.02	0.22	0.01	0.19	0	1.46	0.38	3.25	0.66	0.47	0.21	0.26	0.05	0.13	0.02	0.09	0	2.77	0.19	5.1	0.25	0.47	0.05	0.33	0	0.26	0	0.23	0
CascadeStereoFtStage2	youngster_room7	2.91	0.28	5.23	0.65	0.59	0.11	0.39	0.04	0.26	0.02	0.23	0	2.46	0.49	4.63	1.01	0.57	0.23	0.37	0.1	0.23	0.06	0.19	0.01	3.14	0.17	5.51	0.34	0.6	0.04	0.41	0.01	0.28	0.01	0.25	0
CascadeStereoFtStage2	youngster_room9	3.24	0.22	5.65	0.49	0.64	0.07	0.4	0.02	0.28	0.01	0.25	0	1.28	0.38	2.88	0.82	0.45	0.17	0.24	0.06	0.12	0.02	0.08	0.01	4.07	0.15	6.49	0.23	0.73	0.02	0.46	0.01	0.34	0	0.32	0
CascadeStereoFtStage2	dining_room_1_13	2.31	0.22	3.93	0.47	0.64	0.09	0.42	0.04	0.27	0.01	0.22	0	1.54	0.39	3.1	0.71	0.6	0.2	0.36	0.1	0.19	0.03	0.09	0	2.78	0.12	4.36	0.21	0.67	0.01	0.46	0.01	0.32	0	0.29	0
CascadeStereoFtStage2	living_room_3_2	1.86	0.23	3.47	0.66	0.44	0.04	0.27	0.02	0.22	0.01	0.2	0.01	1.75	0.49	3.42	1.35	0.5	0.13	0.26	0.06	0.17	0.04	0.16	0.04	1.89	0.15	3.48	0.2	0.43	0.01	0.27	0	0.23	0	0.22	0
CascadeStereoFtStage2	office_top4	1.59	0.15	3.03	0.24	0.36	0.04	0.25	0.01	0.2	0	0.18	0	1.36	0.25	2.71	0.37	0.41	0.11	0.23	0.02	0.15	0	0.13	0	1.69	0.11	3.17	0.14	0.34	0	0.25	0	0.22	0	0.2	0
CascadeStereoFtStage2	sleeping_room_1_13	3.72	0.15	6.08	0.33	0.62	0.03	0.42	0	0.34	0	0.32	0	2.67	0.24	5.05	0.61	0.62	0.11	0.35	0.02	0.23	0.01	0.2	0	4.09	0.11	6.39	0.15	0.63	0.01	0.44	0	0.38	0	0.36	0
CascadeStereoFtStage2	dining_room_1_5	2.57	0.62	4.86	1.65	0.66	0.22	0.43	0.11	0.28	0.06	0.22	0.03	2.18	1.01	4.36	2.3	0.67	0.37	0.44	0.2	0.23	0.11	0.14	0.06	2.94	0.25	5.3	0.51	0.64	0.08	0.42	0.03	0.32	0.02	0.3	0
CascadeStereoFtStage2	dining_room_1_7	5.39	0.93	8.47	3.35	0.75	0.25	0.6	0.12	0.45	0.06	0.38	0.04	4.82	1.53	8.61	4.55	0.76	0.39	0.57	0.22	0.38	0.11	0.29	0.07	6.04	0.23	8.31	0.58	0.74	0.1	0.63	0.02	0.53	0	0.5	0
CascadeStereoFtStage2	dining_room_1_9	2.46	0.32	5.06	0.9	0.46	0.12	0.25	0.05	0.19	0.02	0.17	0.01	2.12	0.5	4.44	1.23	0.51	0.22	0.28	0.1	0.18	0.04	0.15	0.02	2.83	0.12	5.66	0.16	0.4	0.01	0.22	0	0.21	0	0.21	0
CascadeStereoFtStage2	floating_cubes1	4.24	0.27	5.79	0.69	0.74	0.09	0.61	0.02	0.55	0.01	0.47	0.01	3.74	0.38	5.26	1	0.75	0.13	0.59	0.04	0.51	0.03	0.43	0.02	4.62	0.18	6.17	0.25	0.74	0.05	0.63	0	0.57	0	0.51	0
CascadeStereoFtStage2	fruit1	2.07	0.24	4	0.37	0.53	0.07	0.34	0.02	0.23	0	0.16	0	2.19	0.32	3.98	0.53	0.61	0.15	0.43	0.05	0.26	0.01	0.16	0	2	0.19	4	0.24	0.48	0.03	0.29	0	0.21	0	0.16	0
CascadeStereoFtStage2	fruit6	2.91	0.28	7.2	0.82	0.52	0.09	0.29	0.03	0.17	0.02	0.14	0.01	3.21	0.57	6.84	1.48	0.63	0.23	0.43	0.1	0.29	0.06	0.2	0.03	2.79	0.16	7.34	0.24	0.48	0.04	0.23	0.01	0.13	0	0.11	0
CascadeStereoFtStage2	fruit8	5.81	0.16	10.33	0.33	0.65	0.04	0.41	0.01	0.31	0	0.28	0	4.44	0.26	8.52	0.54	0.68	0.1	0.47	0.03	0.29	0.01	0.21	0	6.45	0.12	11.07	0.16	0.64	0.01	0.38	0	0.31	0	0.31	0
CascadeStereoFtStage2	hacienda1	0.97	0.3	1.44	0.55	0.61	0.13	0.33	0.03	0.1	0.01	0.03	0	0.78	0.38	1.26	0.72	0.45	0.19	0.22	0.05	0.1	0.02	0.02	0	1.17	0.22	1.61	0.27	0.79	0.06	0.45	0	0.1	0	0.04	0
CascadeStereoFtStage2	hacienda4	0.51	0.24	0.72	0.5	0.42	0.09	0.1	0.02	0	0	0	0	0.51	0.3	0.8	0.65	0.37	0.15	0.12	0.05	0.01	0.01	0	0	0.52	0.18	0.61	0.23	0.48	0.03	0.08	0	0	0	0	0
CascadeStereoFtStage2	hacienda8	0.5	0.31	2.39	0.42	0.24	0.24	0.03	0.01	0.01	0	0.01	0	0.44	0.31	0.59	0.44	0.34	0.2	0.07	0.01	0	0	0	0	0.52	0.3	2.78	0.42	0.2	0.25	0.02	0.01	0.01	0	0.01	0
CascadeStereoFtStage2	landscape1_5	1.03	0.66	4.25	2.41	0.27	0.22	0.11	0.09	0.06	0.05	0.04	0.02	1.32	1.02	4.93	3.69	0.36	0.28	0.15	0.12	0.08	0.08	0.05	0.05	0.84	0.43	3.75	0.86	0.22	0.18	0.08	0.06	0.05	0.04	0.03	0.01
CascadeStereoFtStage2	landscape1_6	0.64	0.4	1.75	1.35	0.38	0.14	0.1	0.06	0.04	0.03	0.02	0.01	0.86	0.58	2.37	1.94	0.45	0.21	0.15	0.09	0.05	0.05	0.03	0.02	0.46	0.25	0.99	0.46	0.32	0.08	0.06	0.04	0.02	0.01	0	0
CascadeStereoFtStage2	landscape3_2	0.46	0.42	2.36	2.04	0.13	0.14	0.05	0.04	0.02	0.02	0.01	0.01	0.77	0.66	3.63	3.12	0.23	0.23	0.09	0.08	0.04	0.03	0.02	0.02	0.23	0.24	0.39	0.45	0.07	0.08	0.02	0.02	0.01	0.01	0	0
CascadeStereoFtStage2	landscape5_2	3.66	0.26	5.62	0.34	0.61	0.11	0.47	0.02	0.4	0	0.36	0	1.99	0.37	4.26	0.48	0.53	0.25	0.29	0.06	0.17	0	0.14	0	4	0.24	5.86	0.31	0.63	0.08	0.51	0.01	0.45	0	0.41	0
CascadeStereoFtStage2	living_room_1_1	1.78	0.33	3.52	0.75	0.57	0.13	0.35	0.07	0.18	0.03	0.11	0.01	1.65	0.5	3.29	1.01	0.52	0.22	0.35	0.12	0.21	0.06	0.1	0.02	1.92	0.14	3.77	0.22	0.63	0.02	0.36	0.01	0.15	0	0.13	0
CascadeStereoFtStage2	living_room_2_3	0.74	0.13	1.57	0.19	0.36	0.02	0.12	0	0.06	0	0.04	0	1.19	0.19	2.2	0.3	0.53	0.07	0.24	0.01	0.13	0	0.09	0	0.63	0.11	1.37	0.14	0.32	0	0.09	0	0.04	0	0.03	0
CascadeStereoFtStage1	abstract_bowls_1	4.86	0.55	9.81	1.33	0.77	0.3	0.59	0.09	0.35	0.03	0.23	0.02	3.34	0.87	7.64	1.91	0.74	0.46	0.56	0.19	0.29	0.07	0.17	0.04	6.16	0.28	11.36	0.38	0.79	0.15	0.62	0.01	0.4	0	0.29	0
CascadeStereoFtStage1	abstract_bowls_14	6.33	0.52	11.53	1.06	0.77	0.32	0.61	0.1	0.45	0.03	0.36	0.01	4.3	0.77	10.73	1.6	0.72	0.42	0.52	0.19	0.32	0.06	0.19	0.03	7.57	0.37	11.99	0.51	0.8	0.25	0.66	0.05	0.54	0.01	0.46	0
CascadeStereoFtStage1	bones_3	3.29	2.3	7.63	6.83	0.76	0.49	0.54	0.27	0.28	0.13	0.13	0.08	4.08	3.13	9.01	8.21	0.77	0.57	0.57	0.35	0.31	0.19	0.16	0.12	1.57	0.49	2.79	1.19	0.73	0.32	0.47	0.09	0.21	0.01	0.07	0
CascadeStereoFtStage1	bones_6	3.36	2.58	8.5	7.18	0.71	0.65	0.49	0.38	0.24	0.14	0.12	0.09	3.98	3.15	9.53	8.07	0.73	0.72	0.52	0.46	0.26	0.18	0.14	0.11	1.07	0.45	1.61	0.57	0.6	0.38	0.4	0.08	0.16	0	0.01	0
CascadeStereoFtStage1	Chairs4	2.91	1.21	3.77	2.18	0.89	0.61	0.77	0.32	0.54	0.15	0.27	0.06	3.1	1.42	3.95	2.44	0.9	0.67	0.8	0.4	0.58	0.19	0.29	0.08	2.32	0.54	3.13	1.01	0.84	0.43	0.67	0.08	0.42	0.01	0.18	0
CascadeStereoFtStage1	chess_8	2.04	0.54	3.67	0.98	0.76	0.35	0.52	0.12	0.22	0.04	0.13	0.01	2.03	0.76	3.61	1.32	0.77	0.48	0.55	0.2	0.23	0.07	0.12	0.02	2.05	0.33	3.72	0.47	0.76	0.22	0.48	0.04	0.21	0	0.14	0
CascadeStereoFtStage1	childroom_1	1.5	0.37	2.71	0.76	0.78	0.2	0.47	0.05	0.15	0.02	0.06	0.01	1.56	0.56	2.85	1.12	0.77	0.33	0.49	0.12	0.18	0.04	0.05	0.01	1.46	0.24	2.61	0.31	0.78	0.1	0.46	0	0.14	0	0.06	0
CascadeStereoFtStage1	childroom_12	4	0.65	7.56	1.9	0.75	0.33	0.54	0.09	0.32	0.03	0.22	0.02	3.04	0.97	6.83	2.67	0.74	0.44	0.51	0.17	0.24	0.07	0.15	0.04	4.96	0.34	8.22	0.43	0.76	0.22	0.58	0.01	0.39	0	0.29	0
CascadeStereoFtStage1	childroom_2	1.35	0.88	4.01	3.13	0.55	0.38	0.32	0.16	0.12	0.07	0.05	0.03	2.11	1.43	5.65	4.47	0.71	0.54	0.47	0.29	0.22	0.13	0.09	0.05	0.65	0.37	1.16	0.62	0.41	0.23	0.18	0.05	0.04	0.01	0.02	0
CascadeStereoFtStage1	childroom_4	0.65	0.44	0.96	0.76	0.51	0.32	0.2	0.08	0.02	0.01	0	0	0.84	0.57	1.23	1	0.65	0.43	0.32	0.15	0.04	0.02	0	0	0.46	0.3	0.57	0.38	0.36	0.2	0.07	0.01	0	0	0	0
CascadeStereoFtStage1	childroom_6	1.62	0.46	3.22	1.02	0.7	0.25	0.41	0.07	0.14	0.02	0.07	0.01	1.4	0.65	2.73	1.42	0.69	0.36	0.42	0.12	0.13	0.05	0.05	0.02	1.8	0.29	3.59	0.45	0.7	0.16	0.41	0.03	0.15	0	0.09	0
CascadeStereoFtStage1	childroom_9	0.99	0.51	1.9	1.25	0.57	0.29	0.31	0.09	0.08	0.02	0.02	0.01	1.43	0.87	2.88	2.01	0.65	0.49	0.38	0.2	0.16	0.06	0.07	0.03	0.73	0.3	0.96	0.39	0.53	0.17	0.27	0.02	0.04	0	0	0
CascadeStereoFtStage1	cloth4	1.7	0.3	3.92	0.43	0.64	0.19	0.4	0.04	0.22	0	0.06	0	2.15	0.43	5.24	0.59	0.71	0.32	0.49	0.09	0.23	0.01	0.06	0	1.58	0.26	3.49	0.37	0.62	0.16	0.38	0.03	0.21	0	0.06	0
CascadeStereoFtStage1	cloth6	1.25	0.37	1.96	0.58	0.68	0.24	0.42	0.04	0.15	0.01	0.04	0	1.62	0.49	2.57	0.84	0.75	0.31	0.53	0.11	0.22	0.02	0.08	0.01	1.07	0.31	1.58	0.4	0.65	0.21	0.37	0.01	0.12	0	0.02	0
CascadeStereoFtStage1	cloth7	5.21	0.7	7.71	2.24	0.79	0.34	0.63	0.13	0.48	0.04	0.42	0.02	3.54	1.05	6.19	2.96	0.75	0.49	0.53	0.23	0.32	0.07	0.25	0.04	6.62	0.41	8.79	1.38	0.83	0.22	0.71	0.05	0.61	0.01	0.56	0
CascadeStereoFtStage1	coral6	1.91	0.42	3.35	0.98	0.67	0.19	0.42	0.07	0.26	0.03	0.14	0.01	2.93	0.75	4.42	1.55	0.8	0.39	0.62	0.17	0.43	0.07	0.25	0.03	1.28	0.21	2.46	0.28	0.58	0.07	0.3	0	0.16	0	0.07	0
CascadeStereoFtStage1	dining_room_1_1	3.61	1.9	8.47	5.92	0.73	0.51	0.55	0.28	0.33	0.14	0.15	0.07	5.26	2.93	10.84	7.71	0.8	0.66	0.64	0.42	0.43	0.22	0.24	0.12	1.25	0.43	2.54	0.61	0.62	0.3	0.42	0.08	0.2	0.01	0.02	0
CascadeStereoFtStage1	office_top5	1.36	0.33	1.76	0.68	0.83	0.16	0.61	0.04	0.16	0.01	0.03	0.01	1.54	0.57	2.07	1.08	0.83	0.33	0.61	0.12	0.24	0.04	0.05	0.02	1.26	0.2	1.57	0.27	0.83	0.07	0.61	0	0.12	0	0.01	0
CascadeStereoFtStage1	park1	0.46	0.37	0.73	0.68	0.32	0.2	0.08	0.06	0.02	0.02	0	0	0.53	0.52	0.91	0.91	0.34	0.31	0.12	0.12	0.04	0.04	0.01	0.01	0.39	0.21	0.48	0.27	0.31	0.08	0.03	0	0	0	0	0
CascadeStereoFtStage1	park10	1.13	0.95	2.21	2.22	0.62	0.37	0.29	0.2	0.1	0.1	0.05	0.05	1.43	1.37	2.7	2.76	0.64	0.55	0.38	0.31	0.16	0.16	0.08	0.08	0.59	0.18	0.69	0.26	0.59	0.05	0.13	0	0	0	0	0
CascadeStereoFtStage1	park6	1.22	1.05	3.85	4.06	0.51	0.29	0.22	0.11	0.08	0.06	0.04	0.04	2.44	2.55	6.52	6.98	0.6	0.53	0.34	0.31	0.17	0.17	0.11	0.12	0.6	0.28	0.86	0.38	0.47	0.17	0.16	0.02	0.04	0	0	0
CascadeStereoFtStage1	person1_1	24.54	0.41	44.87	1.79	0.81	0.14	0.65	0.03	0.5	0.01	0.47	0.01	15.15	1.02	33.19	3.62	0.78	0.35	0.6	0.1	0.38	0.04	0.33	0.03	27.52	0.21	47.98	0.28	0.81	0.08	0.67	0.01	0.54	0	0.52	0
CascadeStereoFtStage1	person1_3	1.66	0.72	5.03	3.14	0.68	0.29	0.4	0.11	0.16	0.03	0.06	0.02	2.96	1.47	8.28	5.29	0.75	0.48	0.51	0.25	0.26	0.1	0.13	0.05	0.97	0.32	1.49	0.42	0.65	0.19	0.34	0.03	0.1	0	0.02	0
CascadeStereoFtStage1	person1_8	11.89	0.53	26.72	1.04	0.87	0.38	0.72	0.12	0.4	0.01	0.35	0.01	11.55	0.85	28.22	2.04	0.83	0.42	0.66	0.16	0.39	0.06	0.32	0.04	11.97	0.46	26.34	0.58	0.88	0.37	0.74	0.11	0.41	0	0.36	0
CascadeStereoFtStage1	person2_5	1.69	0.34	2.69	0.64	0.75	0.19	0.47	0.04	0.23	0.01	0.12	0	1.64	0.53	2.64	0.99	0.71	0.37	0.47	0.12	0.23	0.03	0.1	0.01	1.72	0.23	2.71	0.29	0.77	0.09	0.46	0	0.23	0	0.13	0
CascadeStereoFtStage1	person3_10	1.24	0.34	4.77	0.79	0.55	0.15	0.28	0.05	0.11	0.02	0.03	0	2.15	0.66	8.18	1.44	0.68	0.36	0.43	0.15	0.18	0.06	0.06	0.02	0.9	0.22	2.56	0.31	0.51	0.08	0.22	0.01	0.09	0	0.01	0
CascadeStereoFtStage1	person3_3	2.49	0.42	4.18	1.24	0.67	0.2	0.47	0.07	0.33	0.02	0.23	0.01	2.92	0.94	5.11	2.39	0.69	0.47	0.48	0.19	0.31	0.06	0.23	0.04	2.35	0.25	3.81	0.36	0.66	0.1	0.46	0.03	0.34	0	0.23	0
CascadeStereoFtStage1	person3_4	1.82	0.58	5.36	2.1	0.45	0.24	0.21	0.07	0.1	0.02	0.07	0.02	2.93	1.1	7.25	3.45	0.54	0.39	0.3	0.16	0.17	0.06	0.13	0.05	1.19	0.29	3.9	0.37	0.4	0.16	0.16	0.02	0.06	0	0.04	0
CascadeStereoFtStage1	plant_vintage12	2.74	1.11	4.88	2.9	0.76	0.37	0.55	0.18	0.28	0.1	0.18	0.06	2.63	1.57	4.77	3.61	0.76	0.51	0.55	0.28	0.3	0.16	0.16	0.1	2.92	0.27	5.06	0.37	0.76	0.12	0.53	0.01	0.25	0	0.21	0
CascadeStereoFtStage1	plant_vintage14	6.24	0.36	9.85	0.51	0.73	0.24	0.56	0.04	0.42	0.01	0.36	0	2.83	0.51	5.91	0.75	0.64	0.35	0.39	0.13	0.22	0.03	0.15	0	7.62	0.3	11.06	0.38	0.77	0.2	0.62	0.01	0.5	0	0.45	0
CascadeStereoFtStage1	plant_vintage15	5.32	0.32	9.36	0.51	0.77	0.17	0.53	0.03	0.34	0.01	0.26	0	2.66	0.5	6.14	0.78	0.62	0.32	0.37	0.11	0.18	0.04	0.11	0	6.5	0.25	10.47	0.31	0.83	0.1	0.6	0	0.41	0	0.33	0
CascadeStereoFtStage1	plant_vintage2	1.03	0.27	1.47	0.44	0.65	0.14	0.34	0.02	0.14	0	0.03	0	1.02	0.39	1.51	0.63	0.6	0.24	0.32	0.05	0.13	0.01	0.03	0.01	1.04	0.21	1.45	0.28	0.67	0.08	0.34	0	0.14	0	0.02	0
CascadeStereoFtStage1	plant_vintage4	0.98	0.37	1.57	0.62	0.54	0.21	0.28	0.06	0.13	0.02	0.05	0	1	0.59	1.67	0.94	0.56	0.39	0.3	0.15	0.12	0.05	0.05	0.01	0.96	0.23	1.52	0.3	0.54	0.1	0.28	0	0.13	0	0.05	0
CascadeStereoFtStage1	plant_vintage7	1.73	0.84	3	2.21	0.74	0.34	0.48	0.16	0.18	0.07	0.12	0.05	1.98	1.34	3.59	2.98	0.69	0.51	0.45	0.28	0.23	0.13	0.15	0.08	1.43	0.24	2.08	0.34	0.8	0.13	0.51	0.02	0.12	0	0.08	0
CascadeStereoFtStage1	roundntwist4	1.14	0.47	1.82	0.7	0.68	0.34	0.44	0.13	0.13	0.02	0.02	0	1.22	0.65	1.78	0.87	0.75	0.49	0.52	0.21	0.13	0.03	0.02	0	1.03	0.22	1.88	0.29	0.57	0.11	0.32	0	0.12	0	0.03	0
CascadeStereoFtStage1	ScifiKnot1	1.28	0.35	1.97	0.66	0.67	0.18	0.39	0.05	0.16	0.02	0.07	0	1.54	0.57	2.32	1	0.71	0.32	0.47	0.13	0.23	0.05	0.09	0.01	1.12	0.22	1.72	0.29	0.65	0.09	0.35	0	0.12	0	0.06	0
CascadeStereoFtStage1	ScifiKnot4	5.24	0.8	12.49	1.8	0.88	0.44	0.76	0.18	0.5	0.07	0.27	0.02	5.24	1.6	11.03	3.33	0.85	0.62	0.72	0.36	0.5	0.18	0.3	0.09	5.24	0.52	12.95	0.74	0.89	0.38	0.77	0.12	0.5	0.03	0.26	0
CascadeStereoFtStage1	sleeping_room_1_11	2.03	0.58	5.72	0.85	0.79	0.44	0.59	0.15	0.17	0.02	0.04	0	2.01	0.87	5.29	1.3	0.76	0.6	0.56	0.3	0.21	0.07	0.05	0.01	2.04	0.47	5.87	0.61	0.8	0.38	0.6	0.09	0.15	0	0.04	0
CascadeStereoFtStage1	living_room_3_5	1.42	1.34	2.59	3.43	0.68	0.4	0.41	0.22	0.17	0.12	0.06	0.08	1.93	1.56	3.3	3.58	0.78	0.52	0.54	0.31	0.26	0.16	0.1	0.09	0.97	1.15	1.73	3.3	0.6	0.3	0.3	0.15	0.08	0.09	0.03	0.08
CascadeStereoFtStage1	living_room_3_9	0.97	0.27	1.57	0.45	0.57	0.12	0.27	0.02	0.09	0	0.06	0	0.92	0.38	1.46	0.68	0.6	0.24	0.3	0.05	0.06	0.01	0.04	0	0.99	0.21	1.63	0.27	0.56	0.06	0.26	0	0.1	0	0.07	0
CascadeStereoFtStage1	mannequins_10	2.87	1.72	7.41	6.02	0.67	0.44	0.45	0.23	0.27	0.12	0.14	0.07	3.61	2.49	8.93	7.5	0.73	0.59	0.52	0.34	0.32	0.18	0.16	0.1	1.6	0.38	3.39	1.1	0.58	0.18	0.35	0.03	0.18	0.01	0.09	0.01
CascadeStereoFtStage1	mannequins_12	5.99	0.81	11.91	2.47	0.78	0.31	0.61	0.11	0.44	0.05	0.37	0.03	5.4	1.34	12.52	3.49	0.76	0.48	0.55	0.21	0.35	0.11	0.28	0.07	6.57	0.29	11.29	0.35	0.79	0.14	0.67	0.01	0.53	0	0.45	0
CascadeStereoFtStage1	mannequins_2	3.61	1.2	6.55	3.87	0.77	0.36	0.6	0.17	0.35	0.09	0.22	0.05	3.17	1.67	6.39	4.71	0.75	0.49	0.55	0.26	0.29	0.14	0.17	0.08	4.47	0.27	6.87	0.99	0.8	0.09	0.71	0	0.46	0	0.32	0
CascadeStereoFtStage1	mannequins_5	1.29	0.56	2.13	1.09	0.65	0.33	0.39	0.12	0.17	0.04	0.06	0.01	1.29	0.71	2.19	1.35	0.62	0.41	0.37	0.17	0.17	0.06	0.07	0.02	1.28	0.34	2.04	0.51	0.69	0.21	0.42	0.04	0.17	0.01	0.05	0
CascadeStereoFtStage1	mannequins_9	1.49	0.81	2.69	1.94	0.61	0.38	0.38	0.17	0.2	0.07	0.09	0.03	1.52	1.04	2.82	2.33	0.64	0.47	0.39	0.24	0.2	0.11	0.08	0.04	1.42	0.3	2.38	0.38	0.56	0.17	0.34	0.02	0.21	0	0.13	0
CascadeStereoFtStage1	Minicubes4	4.08	1	6.69	2.62	0.78	0.39	0.62	0.16	0.41	0.09	0.3	0.05	3.77	1.36	6.33	3.23	0.8	0.49	0.63	0.24	0.4	0.14	0.28	0.08	4.65	0.33	7.31	0.42	0.73	0.22	0.59	0.02	0.43	0	0.35	0
CascadeStereoFtStage1	Minicubes5	2.46	0.67	3.84	1.46	0.78	0.4	0.57	0.13	0.35	0.05	0.21	0.02	2.26	0.91	3.79	1.87	0.75	0.48	0.54	0.21	0.31	0.09	0.16	0.03	2.75	0.33	3.92	0.43	0.82	0.28	0.61	0.02	0.41	0	0.28	0
CascadeStereoFtStage1	Minicubes9	5.27	0.58	8.29	1.29	0.86	0.28	0.72	0.11	0.48	0.05	0.34	0.02	3.43	0.84	5.86	1.71	0.82	0.43	0.66	0.19	0.4	0.08	0.23	0.04	7.62	0.24	10.61	0.31	0.91	0.09	0.79	0	0.59	0	0.49	0
CascadeStereoFtStage1	moto3	0.95	0.53	1.29	0.76	0.63	0.4	0.34	0.1	0.13	0.03	0.01	0	1.13	0.65	1.55	0.98	0.64	0.43	0.41	0.18	0.19	0.06	0.02	0.01	0.81	0.43	1.04	0.52	0.61	0.37	0.28	0.04	0.08	0	0	0
CascadeStereoFtStage1	music1_1	4	0.8	10.15	2.2	0.68	0.28	0.45	0.15	0.21	0.08	0.14	0.04	4.26	1.08	11.16	2.18	0.68	0.5	0.46	0.27	0.27	0.13	0.15	0.05	3.87	0.66	9.6	2.21	0.68	0.17	0.44	0.09	0.18	0.06	0.14	0.03
CascadeStereoFtStage1	music1_6	2.44	1.38	4.73	3.65	0.78	0.46	0.55	0.24	0.28	0.12	0.15	0.08	3.03	2.08	5.77	4.71	0.79	0.63	0.59	0.38	0.35	0.2	0.2	0.13	1.57	0.35	2.5	0.55	0.77	0.21	0.49	0.04	0.18	0.01	0.08	0
CascadeStereoFtStage1	music1_7	1.26	0.37	2.3	0.72	0.59	0.2	0.4	0.05	0.15	0.02	0.05	0.01	1.43	0.72	2.56	1.24	0.61	0.41	0.41	0.18	0.22	0.08	0.07	0.03	1.19	0.23	2.18	0.3	0.58	0.11	0.4	0	0.12	0	0.04	0
CascadeStereoFtStage1	music1_9	7.38	0.96	16.8	2.46	0.78	0.34	0.61	0.14	0.45	0.09	0.33	0.07	8.09	1.62	20.35	3.76	0.74	0.52	0.55	0.24	0.35	0.13	0.23	0.09	7.18	0.78	15.67	1.95	0.79	0.28	0.63	0.11	0.48	0.08	0.35	0.06
CascadeStereoFtStage1	nest5	4.58	3.3	18.92	18.08	0.81	0.52	0.6	0.31	0.35	0.19	0.2	0.13	5.89	4.37	23.76	22.91	0.86	0.64	0.69	0.42	0.43	0.26	0.25	0.17	3.02	2.02	10.58	9.53	0.76	0.37	0.51	0.19	0.25	0.11	0.13	0.08
CascadeStereoFtStage1	office1	1.6	0.3	2.65	0.44	0.72	0.17	0.42	0.04	0.22	0	0.11	0	1.04	0.43	1.8	0.59	0.65	0.32	0.35	0.09	0.09	0.01	0.03	0	1.91	0.23	3.02	0.31	0.75	0.09	0.47	0.01	0.29	0	0.16	0
CascadeStereoFtStage1	office12	2.73	0.72	5.1	2.28	0.76	0.26	0.56	0.09	0.35	0.04	0.17	0.03	3.7	1.3	6.68	3.33	0.83	0.45	0.65	0.2	0.43	0.1	0.24	0.06	2.22	0.42	4.03	1.45	0.73	0.16	0.51	0.03	0.3	0.01	0.14	0.01
CascadeStereoFtStage1	office14	4.04	0.74	12.48	2.41	0.6	0.28	0.42	0.15	0.28	0.07	0.13	0.02	3.85	1.38	10.55	3.7	0.71	0.49	0.5	0.29	0.32	0.16	0.17	0.06	4.18	0.28	13.7	0.45	0.53	0.13	0.36	0.05	0.25	0.01	0.11	0
CascadeStereoFtStage1	office2	1.2	0.27	1.78	0.36	0.64	0.13	0.35	0.01	0.18	0	0.08	0	0.88	0.39	1.2	0.52	0.65	0.3	0.3	0.05	0.08	0.01	0.01	0	1.31	0.22	1.95	0.27	0.63	0.06	0.37	0	0.22	0	0.1	0
CascadeStereoFtStage1	sleeping_room_1_15	7.67	0.41	21.89	0.59	0.79	0.27	0.59	0.09	0.35	0.01	0.21	0	5.93	0.49	18.05	0.69	0.76	0.37	0.55	0.11	0.3	0.02	0.19	0	9.05	0.34	24.49	0.49	0.82	0.19	0.63	0.08	0.38	0	0.22	0
CascadeStereoFtStage1	sleeping_room_1_3	1.07	0.28	1.77	0.37	0.57	0.12	0.33	0.02	0.11	0	0.07	0	1.29	0.38	1.92	0.53	0.71	0.25	0.44	0.06	0.14	0.01	0.07	0	0.99	0.24	1.71	0.3	0.52	0.08	0.29	0	0.1	0	0.06	0
CascadeStereoFtStage1	sleeping_room_1_7	1.66	0.3	2.53	0.49	0.79	0.18	0.55	0.02	0.19	0.01	0.1	0	2.1	0.43	3.07	0.75	0.82	0.26	0.6	0.07	0.28	0.02	0.17	0	1.47	0.24	2.24	0.32	0.78	0.14	0.52	0	0.15	0	0.07	0
CascadeStereoFtStage1	spaceStation2	1.96	1.93	2.98	2.91	0.84	0.84	0.74	0.73	0.7	0.69	0.04	0.04	2.18	2.14	4.29	4.18	0.69	0.7	0.48	0.47	0.37	0.36	0.11	0.11	1.85	1.83	2.01	1.97	0.91	0.91	0.87	0.87	0.86	0.86	0	0
CascadeStereoFtStage1	stack_circles4	11.43	0.5	16.18	1.29	0.91	0.26	0.8	0.07	0.63	0.02	0.56	0.01	7.54	0.83	13.05	2.09	0.85	0.42	0.7	0.16	0.5	0.06	0.38	0.03	13.59	0.32	17.69	0.39	0.95	0.17	0.85	0.02	0.7	0	0.66	0
CascadeStereoFtStage1	stack_circles9	14.64	0.44	33.39	1.19	0.79	0.21	0.65	0.07	0.56	0.03	0.46	0.01	7.96	0.79	23.62	1.87	0.7	0.41	0.5	0.16	0.38	0.07	0.31	0.03	18.85	0.22	38.28	0.32	0.85	0.08	0.75	0.02	0.66	0	0.56	0
CascadeStereoFtStage1	time_travellers_10	26.92	1.85	40.01	8.43	0.83	0.29	0.7	0.11	0.6	0.05	0.57	0.04	22.78	4.87	36.06	14.41	0.79	0.55	0.65	0.31	0.53	0.16	0.47	0.11	28.61	0.62	41.52	3.92	0.85	0.18	0.72	0.04	0.62	0.01	0.61	0.01
CascadeStereoFtStage1	time_travellers_13	6.58	0.54	13.47	1.78	0.84	0.21	0.67	0.07	0.54	0.03	0.43	0.02	5.83	0.99	11.71	2.77	0.75	0.36	0.56	0.15	0.43	0.08	0.38	0.05	7.1	0.23	14.55	0.3	0.89	0.1	0.74	0.01	0.61	0	0.47	0
CascadeStereoFtStage1	time_travellers_15	13.3	1.06	18.4	4.33	0.77	0.26	0.62	0.1	0.57	0.05	0.55	0.03	9.8	2.24	16.73	6.87	0.74	0.47	0.53	0.23	0.42	0.12	0.38	0.08	15.33	0.37	19.29	1.56	0.78	0.14	0.67	0.02	0.65	0.01	0.65	0
CascadeStereoFtStage1	time_travellers_2	7.32	0.72	10.69	2.35	0.79	0.27	0.62	0.09	0.5	0.04	0.46	0.03	5.84	1.29	9.72	3.6	0.72	0.43	0.54	0.2	0.4	0.1	0.35	0.07	8.39	0.31	11.34	0.42	0.84	0.15	0.68	0.01	0.58	0	0.55	0
CascadeStereoFtStage1	time_travellers_20	4.5	0.33	6.96	1.01	0.83	0.11	0.66	0.04	0.53	0.02	0.4	0.01	4.15	0.68	7	1.71	0.8	0.27	0.61	0.12	0.47	0.06	0.36	0.04	4.68	0.15	6.93	0.2	0.85	0.02	0.68	0	0.56	0	0.42	0
CascadeStereoFtStage1	time_travellers_24	53.69	1.01	71.25	5.97	0.92	0.22	0.83	0.1	0.71	0.03	0.65	0.02	33.9	3.21	52.56	11.83	0.88	0.46	0.76	0.26	0.6	0.12	0.49	0.07	60.41	0.26	76.57	0.42	0.94	0.14	0.86	0.05	0.75	0	0.71	0
CascadeStereoFtStage1	time_travellers_25	8.98	0.95	13.05	3.78	0.86	0.3	0.67	0.1	0.51	0.05	0.49	0.03	8.29	1.92	13.76	5.96	0.8	0.47	0.6	0.23	0.45	0.11	0.4	0.08	9.44	0.3	12.57	0.41	0.91	0.18	0.71	0.01	0.56	0	0.55	0
CascadeStereoFtStage1	time_travellers_3	16.07	0.95	26.42	3.85	0.81	0.28	0.66	0.11	0.6	0.06	0.58	0.03	12.45	1.85	24.64	5.87	0.77	0.46	0.6	0.24	0.48	0.13	0.44	0.08	18.77	0.28	27.68	0.47	0.84	0.14	0.71	0.02	0.69	0	0.69	0
CascadeStereoFtStage1	twirls2	1.03	0.33	1.85	0.52	0.5	0.19	0.26	0.04	0.13	0.01	0.06	0	1.22	0.48	2.12	0.73	0.56	0.33	0.33	0.09	0.16	0.02	0.07	0	0.91	0.24	1.65	0.3	0.46	0.1	0.22	0	0.11	0	0.05	0
CascadeStereoFtStage1	twirls3	1.87	0.32	6.3	0.51	0.61	0.18	0.36	0.04	0.17	0.01	0.05	0	2.08	0.49	7.83	0.77	0.63	0.33	0.38	0.1	0.18	0.03	0.05	0	1.77	0.24	5.37	0.31	0.6	0.11	0.36	0	0.16	0	0.04	0
CascadeStereoFtStage1	voronoid_sphere6	4.78	1.92	10.35	5.54	0.85	0.49	0.68	0.27	0.35	0.13	0.18	0.08	5.27	2.72	10.62	6.74	0.84	0.63	0.67	0.39	0.37	0.21	0.22	0.12	3.96	0.57	9.88	2.43	0.86	0.26	0.7	0.08	0.3	0.02	0.11	0.01
CascadeStereoFtStage1	voronoid_sphere9	3.36	1.38	6.57	3.16	0.6	0.37	0.45	0.23	0.35	0.16	0.27	0.1	2.67	1.58	5.06	3.42	0.55	0.42	0.39	0.27	0.28	0.19	0.21	0.12	7.35	0.19	12.06	0.27	0.85	0.06	0.81	0.01	0.77	0	0.62	0
CascadeStereoFtStage1	walker4	5.87	0.67	8.2	1.64	0.83	0.29	0.75	0.11	0.63	0.05	0.54	0.03	5.39	1.24	8.31	2.57	0.7	0.48	0.59	0.25	0.49	0.13	0.45	0.09	6.17	0.32	8.13	0.52	0.92	0.18	0.84	0.03	0.72	0	0.59	0
CascadeStereoFtStage1	windmills4	2.35	0.3	11.12	0.51	0.78	0.16	0.45	0.03	0.13	0.01	0.04	0	3.11	0.54	13.35	0.91	0.75	0.32	0.5	0.13	0.23	0.05	0.06	0.01	2.14	0.24	10.42	0.31	0.79	0.11	0.43	0.01	0.1	0	0.03	0
CascadeStereoFtStage1	youngster_room10	5.15	0.62	18.78	0.96	0.67	0.5	0.41	0.14	0.21	0.03	0.11	0.01	4.32	0.85	17.56	1.44	0.7	0.55	0.46	0.27	0.21	0.07	0.09	0.02	5.55	0.51	19.34	0.62	0.65	0.47	0.39	0.07	0.2	0	0.12	0
CascadeStereoFtStage1	youngster_room14	2.48	0.77	3.55	1.43	0.79	0.42	0.62	0.2	0.41	0.08	0.22	0.03	2	1.14	3.13	2	0.76	0.55	0.54	0.31	0.3	0.16	0.13	0.05	2.73	0.58	3.75	0.99	0.8	0.35	0.67	0.14	0.47	0.04	0.26	0.01
CascadeStereoFtStage1	youngster_room4	0.98	0.48	1.91	0.69	0.52	0.35	0.25	0.11	0.1	0.02	0.04	0	1.42	0.71	2.65	0.99	0.64	0.52	0.38	0.23	0.16	0.05	0.07	0	0.75	0.37	1.4	0.48	0.46	0.27	0.19	0.05	0.07	0	0.02	0
CascadeStereoFtStage1	youngster_room7	0.96	0.46	1.53	0.87	0.62	0.26	0.33	0.09	0.08	0.03	0.03	0.01	1.13	0.74	1.9	1.24	0.64	0.47	0.36	0.21	0.11	0.07	0.05	0.02	0.87	0.31	1.31	0.6	0.61	0.16	0.31	0.04	0.07	0.01	0.02	0
CascadeStereoFtStage1	youngster_room9	1.02	0.38	1.35	0.66	0.72	0.22	0.42	0.07	0.09	0.02	0.01	0	1.09	0.62	1.65	1.02	0.64	0.43	0.38	0.16	0.14	0.04	0.02	0.01	0.98	0.28	1.19	0.43	0.75	0.12	0.43	0.03	0.06	0.01	0	0
CascadeStereoFtStage1	dining_room_1_13	1.61	0.37	2.35	0.62	0.73	0.2	0.49	0.07	0.27	0.02	0.11	0	1.41	0.59	2.12	0.87	0.69	0.41	0.48	0.16	0.23	0.04	0.06	0	1.73	0.23	2.48	0.41	0.75	0.07	0.51	0.01	0.29	0.01	0.14	0
CascadeStereoFtStage1	living_room_3_2	1.74	0.35	3.11	0.69	0.54	0.18	0.33	0.04	0.23	0.01	0.16	0.01	1.66	0.66	3.25	1.33	0.56	0.34	0.29	0.15	0.18	0.06	0.13	0.03	1.76	0.27	3.08	0.34	0.53	0.14	0.34	0.01	0.25	0	0.17	0
CascadeStereoFtStage1	office_top4	1.31	0.26	3.41	0.36	0.65	0.1	0.33	0.02	0.15	0	0.06	0	1.63	0.39	5.01	0.54	0.73	0.25	0.43	0.06	0.16	0.01	0.05	0	1.16	0.21	2.35	0.25	0.62	0.03	0.29	0	0.15	0	0.06	0
CascadeStereoFtStage1	sleeping_room_1_13	1.56	0.31	2.64	0.48	0.75	0.16	0.48	0.03	0.21	0	0.09	0	1.62	0.48	3.53	0.79	0.73	0.34	0.48	0.09	0.18	0.01	0.07	0.01	1.53	0.25	2.26	0.32	0.76	0.1	0.48	0.01	0.22	0	0.09	0
CascadeStereoFtStage1	dining_room_1_5	1.91	0.82	4.09	1.84	0.71	0.38	0.49	0.18	0.25	0.09	0.1	0.04	2.05	1.28	4.42	2.52	0.75	0.55	0.51	0.31	0.25	0.15	0.11	0.08	1.76	0.37	3.75	0.69	0.67	0.21	0.46	0.06	0.25	0.02	0.1	0.01
CascadeStereoFtStage1	dining_room_1_7	5.86	1.36	10.37	4.18	0.79	0.41	0.63	0.2	0.44	0.09	0.31	0.05	5.85	2.24	10.49	5.68	0.83	0.59	0.67	0.34	0.46	0.17	0.29	0.1	5.86	0.33	10.23	0.68	0.74	0.2	0.57	0.03	0.41	0	0.33	0
CascadeStereoFtStage1	dining_room_1_9	1.49	0.46	2.91	1.01	0.58	0.25	0.32	0.09	0.14	0.03	0.1	0.01	1.44	0.7	2.71	1.37	0.64	0.42	0.37	0.17	0.15	0.05	0.08	0.02	1.54	0.2	3.13	0.28	0.52	0.08	0.27	0.01	0.14	0	0.12	0
CascadeStereoFtStage1	floating_cubes1	2.8	0.42	3.74	0.96	0.84	0.19	0.68	0.06	0.48	0.03	0.29	0.01	2.92	0.68	3.89	1.41	0.84	0.33	0.71	0.13	0.49	0.07	0.31	0.03	2.7	0.22	3.62	0.3	0.83	0.09	0.66	0	0.47	0	0.28	0
CascadeStereoFtStage1	fruit1	1.1	0.44	1.69	0.6	0.61	0.34	0.34	0.08	0.15	0.01	0.05	0	1.23	0.62	1.84	0.82	0.65	0.48	0.42	0.18	0.18	0.03	0.04	0	1.03	0.35	1.6	0.44	0.58	0.27	0.3	0.03	0.13	0	0.05	0
CascadeStereoFtStage1	fruit6	2.87	0.43	6.47	0.97	0.78	0.21	0.53	0.07	0.2	0.03	0.12	0.01	3.29	0.85	6.29	1.71	0.81	0.44	0.63	0.2	0.35	0.08	0.2	0.04	2.69	0.25	6.54	0.37	0.77	0.11	0.49	0.02	0.13	0	0.09	0
CascadeStereoFtStage1	fruit8	4.89	0.29	8.71	0.48	0.82	0.12	0.62	0.04	0.28	0.01	0.23	0	3.51	0.45	6.8	0.75	0.79	0.27	0.59	0.1	0.28	0.03	0.16	0	5.53	0.21	9.48	0.28	0.84	0.05	0.63	0.01	0.29	0	0.27	0
CascadeStereoFtStage1	hacienda1	1.18	0.59	1.42	0.8	0.79	0.51	0.55	0.13	0.14	0.02	0	0	1.04	0.64	1.38	0.93	0.7	0.51	0.41	0.16	0.12	0.04	0.01	0	1.33	0.54	1.47	0.63	0.88	0.5	0.71	0.09	0.15	0	0	0
CascadeStereoFtStage1	hacienda4	0.68	0.34	0.87	0.59	0.6	0.2	0.23	0.05	0	0	0	0	0.62	0.4	0.87	0.73	0.53	0.25	0.17	0.09	0	0.01	0	0	0.76	0.27	0.87	0.35	0.69	0.15	0.31	0.01	0	0	0	0
CascadeStereoFtStage1	hacienda8	1.26	0.73	5.02	3.02	0.51	0.28	0.18	0.05	0.04	0.03	0.03	0.02	0.63	0.43	1.35	0.65	0.45	0.33	0.16	0.07	0.02	0.01	0.01	0	1.5	0.84	5.82	3.52	0.53	0.26	0.19	0.04	0.05	0.03	0.04	0.03
CascadeStereoFtStage1	landscape1_5	1.08	0.81	3.75	2.26	0.48	0.46	0.18	0.15	0.06	0.06	0.03	0.02	1.76	1.18	5.48	3.43	0.6	0.53	0.3	0.23	0.11	0.1	0.06	0.05	0.63	0.58	1.93	0.87	0.41	0.42	0.11	0.1	0.03	0.04	0.01	0.01
CascadeStereoFtStage1	landscape1_6	1.04	0.65	1.81	1.35	0.71	0.44	0.37	0.14	0.07	0.04	0.02	0.01	1.31	0.9	2.45	1.91	0.72	0.52	0.43	0.23	0.13	0.08	0.04	0.03	0.82	0.45	1.01	0.56	0.7	0.38	0.33	0.06	0.02	0	0.01	0
CascadeStereoFtStage1	landscape3_2	1.05	0.97	2.93	2.55	0.52	0.5	0.33	0.29	0.2	0.19	0.02	0.01	1.27	1.13	4.27	3.68	0.52	0.5	0.27	0.24	0.13	0.12	0.04	0.03	0.9	0.85	1.3	1.2	0.52	0.51	0.37	0.32	0.25	0.24	0	0
CascadeStereoFtStage1	landscape5_2	2.46	0.5	7.69	0.63	0.72	0.41	0.47	0.09	0.26	0.01	0.07	0	1.89	0.67	5.21	0.83	0.62	0.56	0.35	0.22	0.15	0.02	0.08	0	2.58	0.46	8.11	0.58	0.74	0.38	0.5	0.06	0.28	0.01	0.07	0
CascadeStereoFtStage1	living_room_1_1	1.18	0.49	1.73	0.83	0.65	0.26	0.44	0.11	0.19	0.04	0.02	0.01	1.25	0.7	1.96	1.09	0.64	0.42	0.4	0.21	0.21	0.08	0.04	0.01	1.1	0.24	1.42	0.31	0.67	0.08	0.48	0.01	0.17	0	0	0
CascadeStereoFtStage1	living_room_2_3	1.07	0.23	1.38	0.33	0.8	0.08	0.41	0.02	0.09	0	0.02	0	1.3	0.38	1.77	0.54	0.77	0.25	0.46	0.09	0.17	0	0.04	0	1.01	0.19	1.27	0.25	0.8	0.04	0.39	0	0.06	0	0.02	0
DeepPruner_Best	abstract_bowls_1	1.65	0.72	2.9	2.23	0.68	0.22	0.43	0.1	0.23	0.06	0.1	0.04	1.9	1.31	3.62	3.25	0.63	0.39	0.39	0.19	0.23	0.12	0.14	0.09	1.43	0.21	2.09	0.37	0.72	0.07	0.46	0.02	0.23	0	0.07	0
DeepPruner_Best	abstract_bowls_14	4.68	0.53	8.38	1.52	0.7	0.2	0.54	0.08	0.4	0.04	0.31	0.02	3.48	1.02	7.46	2.43	0.64	0.37	0.45	0.19	0.28	0.1	0.19	0.05	5.41	0.23	8.9	0.36	0.74	0.1	0.6	0.02	0.47	0	0.38	0
DeepPruner_Best	bones_3	4.54	3.17	10.63	8.84	0.51	0.35	0.35	0.22	0.24	0.16	0.17	0.12	4.9	4.53	10.99	10.65	0.56	0.48	0.38	0.32	0.26	0.24	0.19	0.17	3.75	0.2	9.81	0.72	0.4	0.05	0.27	0.01	0.19	0	0.12	0
DeepPruner_Best	bones_6	3.69	3.83	9.73	9.98	0.53	0.45	0.33	0.3	0.2	0.19	0.13	0.14	4.53	4.76	10.93	11.21	0.59	0.55	0.39	0.37	0.25	0.25	0.17	0.18	0.54	0.33	1.19	1.5	0.32	0.09	0.12	0.01	0.03	0	0.01	0
DeepPruner_Best	Chairs4	2.62	1.55	4.12	3.29	0.65	0.36	0.49	0.25	0.38	0.2	0.27	0.14	2.94	1.98	4.4	3.76	0.71	0.46	0.56	0.33	0.44	0.27	0.32	0.19	1.6	0.22	3.08	0.7	0.47	0.04	0.26	0.01	0.19	0	0.15	0
DeepPruner_Best	chess_8	1.67	0.45	3.28	1.35	0.4	0.14	0.26	0.06	0.22	0.04	0.17	0.03	1.82	0.78	3.37	1.92	0.5	0.26	0.31	0.12	0.24	0.08	0.17	0.05	1.53	0.13	3.19	0.17	0.29	0.01	0.21	0	0.21	0	0.17	0
DeepPruner_Best	childroom_1	0.48	0.29	0.98	0.86	0.29	0.09	0.09	0.03	0.03	0.02	0.01	0.01	0.69	0.51	1.42	1.32	0.37	0.2	0.15	0.08	0.06	0.04	0.03	0.02	0.34	0.14	0.45	0.18	0.24	0.02	0.04	0	0	0	0	0
DeepPruner_Best	childroom_12	2.04	0.73	4.93	2.93	0.45	0.13	0.28	0.06	0.16	0.05	0.11	0.04	2.1	1.3	5.12	4.11	0.43	0.23	0.26	0.12	0.16	0.09	0.12	0.07	1.97	0.16	4.73	0.58	0.48	0.02	0.3	0.01	0.17	0	0.1	0
DeepPruner_Best	childroom_2	1.93	1.06	6.33	4.61	0.55	0.22	0.36	0.13	0.18	0.07	0.07	0.04	3.01	1.97	8.91	6.63	0.62	0.41	0.45	0.24	0.24	0.14	0.12	0.09	0.93	0.21	1.91	0.55	0.48	0.05	0.28	0.03	0.12	0.01	0.02	0
DeepPruner_Best	childroom_4	0.42	0.27	0.85	0.7	0.26	0.13	0.09	0.03	0.02	0.01	0	0	0.56	0.42	1.13	0.97	0.37	0.24	0.13	0.05	0.03	0.02	0.01	0.01	0.28	0.13	0.39	0.16	0.14	0.01	0.04	0	0	0	0	0
DeepPruner_Best	childroom_6	0.59	0.41	1.56	1.41	0.24	0.12	0.09	0.04	0.05	0.03	0.03	0.02	0.86	0.68	2.12	2	0.35	0.2	0.14	0.09	0.08	0.06	0.05	0.04	0.36	0.17	0.82	0.52	0.14	0.04	0.04	0.01	0.03	0	0.01	0
DeepPruner_Best	childroom_9	0.53	0.42	1.67	1.58	0.19	0.13	0.07	0.05	0.03	0.03	0.02	0.02	1.08	0.91	2.75	2.6	0.39	0.3	0.18	0.13	0.1	0.08	0.06	0.05	0.22	0.14	0.28	0.2	0.08	0.03	0	0	0	0	0	0
DeepPruner_Best	cloth4	1.49	0.31	4.68	0.41	0.47	0.13	0.29	0.03	0.12	0	0.04	0	2.28	0.49	6.39	0.68	0.62	0.33	0.48	0.12	0.22	0.02	0.07	0	1.28	0.26	4.1	0.3	0.43	0.07	0.24	0	0.1	0	0.03	0
DeepPruner_Best	cloth6	1.54	0.33	3.43	0.8	0.58	0.13	0.33	0.04	0.21	0.02	0.08	0.01	1.92	0.62	4.43	1.36	0.63	0.29	0.4	0.11	0.26	0.06	0.1	0.02	1.36	0.19	2.84	0.24	0.55	0.05	0.3	0	0.19	0	0.07	0
DeepPruner_Best	cloth7	7.37	0.6	16.99	2.04	0.6	0.19	0.45	0.08	0.36	0.03	0.33	0.03	4.52	1.1	13.28	2.98	0.56	0.34	0.35	0.16	0.23	0.07	0.2	0.06	9.76	0.18	19.58	0.41	0.64	0.07	0.53	0.01	0.48	0	0.44	0
DeepPruner_Best	coral6	1.66	0.52	3.07	1.68	0.53	0.12	0.35	0.07	0.23	0.05	0.13	0.03	2.6	1.13	4.12	2.71	0.69	0.28	0.53	0.17	0.36	0.13	0.24	0.09	1.07	0.14	2.18	0.2	0.43	0.01	0.24	0	0.14	0	0.06	0
DeepPruner_Best	dining_room_1_1	4.29	4.62	10.69	11.41	0.58	0.51	0.39	0.36	0.24	0.22	0.17	0.18	6.23	6.91	13.33	14.26	0.66	0.62	0.48	0.47	0.33	0.33	0.25	0.27	1.52	1.37	4.88	5.08	0.47	0.36	0.26	0.22	0.1	0.07	0.06	0.04
DeepPruner_Best	office_top5	0.64	0.33	1.13	0.86	0.37	0.11	0.16	0.04	0.06	0.03	0.02	0.02	0.9	0.65	1.64	1.43	0.41	0.27	0.22	0.11	0.14	0.07	0.05	0.05	0.49	0.15	0.73	0.21	0.35	0.02	0.13	0	0.02	0	0	0
DeepPruner_Best	park1	0.44	0.45	0.81	0.8	0.21	0.22	0.09	0.09	0.03	0.03	0.01	0.01	0.62	0.63	1.09	1.08	0.34	0.35	0.17	0.17	0.06	0.06	0.02	0.01	0.25	0.26	0.31	0.31	0.07	0.08	0.01	0	0	0	0	0
DeepPruner_Best	park10	1.11	1.08	2.76	2.82	0.35	0.31	0.2	0.18	0.12	0.12	0.07	0.07	1.63	1.61	3.43	3.51	0.51	0.47	0.3	0.28	0.19	0.18	0.11	0.11	0.18	0.12	0.28	0.15	0.06	0	0.01	0	0	0	0	0
DeepPruner_Best	park6	1.42	1.14	4.7	4.33	0.38	0.18	0.21	0.11	0.08	0.07	0.06	0.05	3.44	3.04	8.05	7.46	0.59	0.45	0.41	0.31	0.24	0.22	0.16	0.16	0.39	0.17	0.64	0.24	0.27	0.05	0.1	0	0	0	0	0
DeepPruner_Best	person1_1	17.96	1.26	32.22	5.31	0.59	0.08	0.47	0.05	0.44	0.05	0.43	0.05	12.93	3.93	25.3	9.59	0.59	0.26	0.42	0.18	0.36	0.17	0.36	0.16	19.55	0.42	34.12	2.83	0.58	0.02	0.49	0.01	0.47	0.01	0.46	0.01
DeepPruner_Best	person1_3	1.84	1.43	6.79	6.82	0.41	0.26	0.26	0.1	0.11	0.06	0.06	0.04	4.17	3.52	11.35	11.43	0.56	0.42	0.4	0.25	0.24	0.17	0.17	0.12	0.59	0.31	1.33	1.27	0.34	0.18	0.18	0.02	0.04	0.01	0.01	0
DeepPruner_Best	person1_8	11.17	0.59	24	2.36	0.46	0.1	0.37	0.05	0.34	0.04	0.32	0.03	11.89	2.14	26.56	5.12	0.53	0.25	0.38	0.19	0.34	0.17	0.33	0.15	10.99	0.22	23.34	0.74	0.44	0.06	0.37	0.02	0.34	0.01	0.32	0.01
DeepPruner_Best	person2_5	1.58	0.26	4.71	0.72	0.58	0.08	0.34	0.03	0.15	0.01	0.08	0.01	1.82	0.49	5.73	1.19	0.54	0.21	0.33	0.08	0.17	0.04	0.09	0.02	1.45	0.13	4.02	0.16	0.6	0	0.34	0	0.13	0	0.07	0
DeepPruner_Best	person3_10	1.62	0.35	5.23	1.25	0.47	0.11	0.35	0.05	0.2	0.03	0.07	0.01	2.5	0.83	7.13	2.36	0.6	0.3	0.44	0.15	0.25	0.08	0.12	0.03	1.29	0.17	4.34	0.3	0.43	0.04	0.32	0.02	0.18	0	0.05	0
DeepPruner_Best	person3_3	1.74	0.47	3.79	1.98	0.48	0.13	0.3	0.04	0.18	0.02	0.12	0.02	2.6	1.32	5.29	3.92	0.62	0.32	0.39	0.15	0.23	0.09	0.15	0.07	1.46	0.18	3.13	0.27	0.44	0.07	0.27	0.01	0.16	0	0.11	0
DeepPruner_Best	person3_4	2.44	0.9	7.07	3.74	0.37	0.15	0.18	0.07	0.11	0.04	0.09	0.04	3.82	2.15	8.98	6.15	0.5	0.31	0.29	0.17	0.18	0.12	0.16	0.1	1.65	0.19	5.72	0.63	0.3	0.06	0.13	0.01	0.07	0	0.06	0
DeepPruner_Best	plant_vintage12	2.63	1.41	5.08	3.79	0.55	0.3	0.37	0.19	0.28	0.13	0.21	0.1	2.66	2.11	5.27	4.73	0.57	0.45	0.37	0.29	0.27	0.21	0.2	0.15	2.58	0.18	4.72	0.44	0.52	0.03	0.38	0.01	0.29	0.01	0.22	0
DeepPruner_Best	plant_vintage14	0.72	0.28	2.35	0.5	0.32	0.1	0.18	0.03	0.09	0.01	0.01	0	1.05	0.52	3.33	0.86	0.45	0.3	0.29	0.12	0.14	0.05	0.02	0.01	0.59	0.18	1.8	0.23	0.27	0.02	0.14	0	0.08	0	0	0
DeepPruner_Best	plant_vintage15	0.51	0.25	0.86	0.51	0.26	0.09	0.15	0.04	0.06	0.02	0	0	0.77	0.51	1.19	0.88	0.42	0.28	0.27	0.12	0.12	0.05	0.01	0.01	0.39	0.13	0.65	0.16	0.19	0.01	0.1	0	0.03	0	0	0
DeepPruner_Best	plant_vintage2	0.65	0.46	1.19	0.59	0.45	0.37	0.17	0.06	0.03	0	0.01	0	0.77	0.52	1.46	0.72	0.48	0.44	0.26	0.13	0.04	0.01	0.01	0	0.58	0.43	1.01	0.5	0.43	0.34	0.12	0.02	0.02	0	0.01	0
DeepPruner_Best	plant_vintage4	0.88	0.38	3.3	0.72	0.32	0.2	0.16	0.06	0.08	0.02	0.03	0.01	1.18	0.62	4	1.11	0.43	0.35	0.26	0.16	0.13	0.06	0.04	0.02	0.71	0.23	2.79	0.29	0.25	0.11	0.1	0	0.05	0	0.02	0
DeepPruner_Best	plant_vintage7	1.07	1.08	2.7	2.88	0.32	0.27	0.15	0.13	0.1	0.09	0.08	0.08	1.7	1.77	3.63	3.9	0.47	0.45	0.25	0.24	0.17	0.17	0.14	0.14	0.31	0.25	0.53	0.3	0.14	0.06	0.03	0	0.02	0	0	0
DeepPruner_Best	roundntwist4	1.82	1.06	2.25	1.38	0.77	0.71	0.65	0.39	0.44	0.13	0.06	0.01	1.45	1.11	1.98	1.55	0.63	0.59	0.48	0.4	0.33	0.19	0.05	0.02	2.36	0.98	2.61	1.09	0.98	0.88	0.9	0.38	0.61	0.03	0.08	0
DeepPruner_Best	ScifiKnot1	1.38	0.49	2.49	1.34	0.47	0.16	0.3	0.08	0.19	0.05	0.13	0.03	1.89	0.99	3.13	2.1	0.56	0.32	0.38	0.19	0.29	0.13	0.19	0.08	1.06	0.19	2.01	0.42	0.41	0.06	0.24	0.02	0.14	0.01	0.1	0
DeepPruner_Best	ScifiKnot4	3.27	0.77	6.78	2.77	0.69	0.2	0.55	0.12	0.39	0.06	0.17	0.03	4.78	2.31	9.2	5.43	0.8	0.49	0.64	0.34	0.45	0.21	0.25	0.13	2.75	0.24	5.72	0.47	0.66	0.1	0.51	0.04	0.38	0.01	0.14	0
DeepPruner_Best	sleeping_room_1_11	0.59	0.24	0.89	0.57	0.44	0.09	0.18	0.03	0.02	0.01	0	0	0.73	0.48	1.23	1.04	0.45	0.24	0.23	0.11	0.05	0.03	0.01	0.01	0.54	0.15	0.72	0.21	0.43	0.03	0.16	0.01	0.01	0	0	0
DeepPruner_Best	living_room_3_5	1.62	0.94	3.6	2.4	0.41	0.3	0.26	0.18	0.17	0.11	0.12	0.05	2.06	1.5	4.16	3.3	0.5	0.45	0.33	0.26	0.21	0.16	0.15	0.1	1.24	0.44	3.02	1.09	0.32	0.17	0.21	0.11	0.12	0.06	0.08	0.01
DeepPruner_Best	living_room_3_9	0.51	0.31	0.8	0.51	0.33	0.18	0.12	0.03	0.03	0	0	0	0.62	0.44	1	0.76	0.41	0.31	0.17	0.08	0.04	0.01	0.01	0	0.45	0.24	0.68	0.31	0.28	0.11	0.09	0	0.02	0	0	0
DeepPruner_Best	mannequins_10	4.89	4.43	12.23	12.61	0.59	0.37	0.44	0.25	0.33	0.18	0.22	0.14	6.47	6.69	14.82	15.7	0.67	0.52	0.5	0.38	0.38	0.28	0.26	0.21	2.14	0.5	5.21	2.6	0.46	0.1	0.32	0.03	0.24	0.02	0.14	0.01
DeepPruner_Best	mannequins_12	5.32	1.46	9.08	4.79	0.64	0.17	0.53	0.11	0.45	0.09	0.41	0.08	5.54	2.78	9.96	6.69	0.56	0.34	0.44	0.23	0.38	0.18	0.35	0.16	5.11	0.16	8.12	1.24	0.71	0.01	0.61	0	0.53	0	0.46	0
DeepPruner_Best	mannequins_2	3.91	1.63	7.13	4.81	0.61	0.26	0.51	0.17	0.41	0.13	0.28	0.09	3.65	2.38	7.2	5.87	0.55	0.38	0.45	0.26	0.35	0.19	0.23	0.14	4.42	0.16	6.98	1.01	0.71	0.01	0.63	0	0.53	0	0.38	0
DeepPruner_Best	mannequins_5	1.04	0.59	1.99	1.54	0.45	0.22	0.27	0.1	0.12	0.05	0.07	0.04	1.27	0.89	2.38	1.99	0.49	0.35	0.32	0.17	0.15	0.09	0.1	0.07	0.71	0.16	1.23	0.21	0.39	0.03	0.19	0	0.08	0	0.03	0
DeepPruner_Best	mannequins_9	2.08	1.31	4.29	3.87	0.48	0.27	0.34	0.16	0.27	0.1	0.15	0.07	2.3	1.8	4.75	4.58	0.52	0.39	0.37	0.23	0.28	0.15	0.14	0.1	1.6	0.22	3.01	1.28	0.38	0.02	0.27	0.01	0.26	0.01	0.19	0
DeepPruner_Best	Minicubes4	3.69	2.58	6.38	5.45	0.61	0.38	0.42	0.28	0.34	0.23	0.3	0.19	3.45	2.96	6.2	5.86	0.59	0.45	0.42	0.32	0.33	0.27	0.27	0.23	4.15	1.89	6.69	4.58	0.65	0.26	0.43	0.19	0.35	0.16	0.34	0.13
DeepPruner_Best	Minicubes5	3.52	1.45	6.27	3.27	0.66	0.38	0.46	0.23	0.36	0.16	0.31	0.11	2.95	1.77	5.69	3.76	0.64	0.41	0.44	0.28	0.32	0.2	0.25	0.14	4.34	0.98	7.02	2.41	0.69	0.33	0.49	0.16	0.42	0.1	0.4	0.07
DeepPruner_Best	Minicubes9	4.03	0.74	7.97	2.04	0.77	0.21	0.63	0.11	0.52	0.08	0.39	0.05	3.34	1.19	7.89	2.73	0.7	0.35	0.53	0.2	0.39	0.14	0.26	0.09	4.91	0.16	8.06	0.2	0.85	0.03	0.76	0	0.68	0	0.56	0
DeepPruner_Best	moto3	0.82	0.66	1.48	1.15	0.39	0.36	0.19	0.15	0.11	0.07	0.05	0.02	1.19	0.95	1.94	1.58	0.52	0.46	0.31	0.27	0.2	0.14	0.09	0.04	0.52	0.43	0.97	0.62	0.28	0.28	0.09	0.06	0.05	0.02	0.02	0
DeepPruner_Best	music1_1	2.19	0.52	5.76	1.25	0.39	0.21	0.25	0.12	0.18	0.05	0.12	0.02	2.99	1.05	7.3	2.07	0.51	0.42	0.37	0.25	0.25	0.14	0.14	0.07	1.78	0.26	4.81	0.45	0.34	0.11	0.19	0.05	0.14	0.01	0.1	0
DeepPruner_Best	music1_6	2.37	1.6	5.1	4.85	0.53	0.29	0.38	0.19	0.26	0.12	0.17	0.09	3.23	2.57	6.38	6.27	0.61	0.46	0.45	0.3	0.34	0.2	0.24	0.15	1.11	0.18	2.11	0.35	0.42	0.05	0.27	0.02	0.15	0.01	0.09	0
DeepPruner_Best	music1_7	0.65	0.35	1.24	0.89	0.3	0.1	0.14	0.05	0.08	0.03	0.03	0.02	1.16	0.8	1.95	1.6	0.49	0.32	0.3	0.18	0.19	0.11	0.1	0.06	0.43	0.15	0.76	0.18	0.21	0.01	0.08	0	0.04	0	0	0
DeepPruner_Best	music1_9	6.89	0.55	13.73	1.42	0.64	0.22	0.56	0.11	0.47	0.05	0.36	0.02	7.23	1.24	15.58	2.62	0.57	0.42	0.47	0.3	0.35	0.16	0.27	0.07	6.8	0.36	13.16	0.81	0.66	0.16	0.59	0.06	0.51	0.02	0.38	0.01
DeepPruner_Best	nest5	5.21	3.54	19.49	18.95	0.73	0.41	0.51	0.3	0.34	0.21	0.26	0.14	6.55	5.57	24.52	24.24	0.76	0.61	0.58	0.46	0.41	0.33	0.31	0.23	3.61	1.11	10.78	9.29	0.69	0.18	0.43	0.11	0.26	0.06	0.21	0.03
DeepPruner_Best	office1	1.72	0.34	5.63	0.47	0.53	0.16	0.3	0.04	0.17	0.01	0.05	0	1.38	0.48	4.97	0.69	0.51	0.35	0.3	0.1	0.14	0.02	0.02	0	1.92	0.26	5.97	0.29	0.55	0.05	0.3	0	0.19	0	0.06	0
DeepPruner_Best	office12	3.6	0.91	6.27	3.31	0.71	0.16	0.58	0.09	0.4	0.07	0.25	0.05	5.56	2.13	8.56	5.43	0.77	0.33	0.66	0.21	0.54	0.16	0.4	0.13	2.56	0.26	4.62	1.04	0.68	0.07	0.54	0.03	0.33	0.02	0.17	0.01
DeepPruner_Best	office14	2.56	0.94	6.52	3.73	0.46	0.2	0.29	0.12	0.19	0.07	0.13	0.04	3.18	2.01	7.36	5.75	0.61	0.38	0.38	0.24	0.25	0.16	0.17	0.11	2.12	0.19	5.85	0.6	0.35	0.08	0.22	0.03	0.14	0	0.09	0
DeepPruner_Best	office2	2.09	0.39	6.54	0.48	0.62	0.24	0.26	0.04	0.13	0	0.08	0	1.57	0.5	5.82	0.65	0.53	0.41	0.31	0.12	0.09	0	0.03	0	2.28	0.35	6.79	0.4	0.65	0.18	0.25	0.01	0.15	0	0.1	0
DeepPruner_Best	sleeping_room_1_15	0.93	0.29	1.35	0.52	0.52	0.13	0.38	0.05	0.14	0.01	0	0	1.01	0.45	1.43	0.75	0.56	0.27	0.37	0.1	0.17	0.03	0	0	0.87	0.16	1.28	0.21	0.49	0.02	0.4	0	0.12	0	0	0
DeepPruner_Best	sleeping_room_1_3	0.55	0.78	1.1	3.03	0.38	0.28	0.09	0.09	0.02	0.03	0.01	0.02	0.73	1.06	1.51	3.7	0.47	0.39	0.17	0.17	0.05	0.05	0.02	0.03	0.49	0.69	0.92	2.77	0.35	0.24	0.06	0.06	0.01	0.02	0	0.02
DeepPruner_Best	sleeping_room_1_7	0.67	0.36	1.18	0.84	0.41	0.15	0.18	0.04	0.06	0.02	0.02	0.01	0.98	0.67	1.69	1.44	0.54	0.32	0.29	0.12	0.1	0.07	0.06	0.04	0.53	0.22	0.86	0.28	0.35	0.07	0.13	0	0.04	0	0.01	0
DeepPruner_Best	spaceStation2	10.18	10.96	13.72	15.58	0.77	0.76	0.71	0.7	0.69	0.69	0.69	0.69	4.6	4.6	8.25	8.34	0.54	0.52	0.41	0.4	0.35	0.35	0.34	0.34	13.02	14.2	15.79	18.19	0.88	0.88	0.86	0.86	0.86	0.86	0.86	0.86
DeepPruner_Best	stack_circles4	14.46	0.77	22.82	3.11	0.74	0.12	0.64	0.06	0.58	0.05	0.55	0.04	8.88	1.76	18.1	4.96	0.7	0.28	0.54	0.16	0.42	0.12	0.36	0.1	17.58	0.22	25.07	1.18	0.77	0.02	0.69	0.01	0.67	0.01	0.66	0
DeepPruner_Best	stack_circles9	10.41	1.02	19.35	3.33	0.73	0.18	0.64	0.11	0.58	0.08	0.53	0.06	6.62	2.03	14.73	4.9	0.61	0.36	0.47	0.22	0.38	0.17	0.35	0.14	12.8	0.38	21.76	1.72	0.81	0.06	0.75	0.03	0.7	0.02	0.65	0.02
DeepPruner_Best	time_travellers_10	34.51	3.24	45.83	12.06	0.75	0.19	0.65	0.13	0.6	0.1	0.58	0.08	26.09	8.76	38.99	20.31	0.76	0.44	0.62	0.32	0.51	0.25	0.46	0.21	37.94	0.99	48.34	6.06	0.75	0.09	0.67	0.06	0.63	0.03	0.63	0.02
DeepPruner_Best	time_travellers_13	10.12	0.95	13.91	3.49	0.78	0.12	0.69	0.08	0.65	0.06	0.63	0.06	7.43	2.14	12.29	5.46	0.67	0.3	0.54	0.18	0.47	0.15	0.45	0.14	11.97	0.14	14.91	0.32	0.85	0	0.8	0	0.77	0	0.75	0
DeepPruner_Best	time_travellers_15	14.82	2.7	21.89	8.37	0.68	0.18	0.6	0.13	0.57	0.11	0.56	0.1	11.65	5.75	20.32	12.19	0.64	0.41	0.5	0.3	0.43	0.25	0.4	0.22	16.65	0.94	22.75	4.96	0.7	0.05	0.66	0.04	0.65	0.03	0.65	0.03
DeepPruner_Best	time_travellers_2	7	1.22	10.49	4.59	0.65	0.15	0.55	0.09	0.52	0.07	0.5	0.06	5.75	2.71	10	7.07	0.6	0.33	0.44	0.21	0.39	0.17	0.35	0.15	7.9	0.14	10.82	0.45	0.68	0.02	0.63	0.01	0.62	0	0.6	0
DeepPruner_Best	time_travellers_20	6.56	0.4	9.25	1.53	0.84	0.07	0.77	0.04	0.72	0.03	0.62	0.03	5.32	0.97	9.27	2.62	0.71	0.22	0.59	0.13	0.52	0.1	0.46	0.08	7.19	0.11	9.24	0.14	0.91	0	0.87	0	0.82	0	0.7	0
DeepPruner_Best	time_travellers_24	41.51	2.22	51.53	9.38	0.86	0.17	0.76	0.12	0.7	0.1	0.68	0.07	30.56	6.7	44.58	17.59	0.81	0.39	0.66	0.27	0.54	0.2	0.49	0.17	45.23	0.7	53.69	3.56	0.88	0.09	0.8	0.07	0.75	0.06	0.74	0.03
DeepPruner_Best	time_travellers_25	10.74	2.29	16.63	7.99	0.66	0.17	0.56	0.12	0.52	0.1	0.51	0.09	10.66	4.78	17.89	11.84	0.69	0.36	0.53	0.25	0.45	0.21	0.43	0.18	10.78	0.64	15.73	3.64	0.65	0.04	0.57	0.03	0.56	0.03	0.56	0.02
DeepPruner_Best	time_travellers_3	12.59	1.61	17.83	6.1	0.71	0.18	0.64	0.12	0.6	0.09	0.59	0.07	9.86	3.52	16.11	9.3	0.67	0.37	0.56	0.25	0.49	0.2	0.45	0.16	14.63	0.19	19.01	0.7	0.75	0.03	0.7	0.02	0.69	0.01	0.69	0
DeepPruner_Best	twirls2	1.28	0.45	2.15	0.87	0.46	0.23	0.31	0.08	0.26	0.03	0.09	0.01	1.57	0.71	2.47	1.31	0.57	0.38	0.4	0.19	0.31	0.06	0.11	0.03	1.09	0.29	1.92	0.36	0.39	0.14	0.26	0.01	0.22	0	0.08	0
DeepPruner_Best	twirls3	1.19	0.4	2.09	0.77	0.42	0.24	0.32	0.06	0.24	0.02	0.07	0.01	1.48	0.66	2.57	1.22	0.5	0.37	0.36	0.17	0.27	0.07	0.11	0.03	1.04	0.28	1.8	0.37	0.38	0.17	0.3	0.01	0.22	0	0.04	0
DeepPruner_Best	voronoid_sphere6	4.92	3.48	10.43	9.01	0.71	0.28	0.45	0.2	0.24	0.17	0.2	0.14	6.17	5.21	11.88	11.09	0.77	0.4	0.53	0.31	0.31	0.26	0.25	0.22	2.82	0.56	7.37	3.31	0.61	0.06	0.32	0.03	0.12	0.02	0.1	0.02
DeepPruner_Best	voronoid_sphere9	4.42	2.54	7.13	5.45	0.54	0.34	0.45	0.26	0.41	0.23	0.36	0.19	3.49	2.9	6.18	5.86	0.48	0.35	0.38	0.3	0.35	0.27	0.29	0.22	9.79	0.45	11.17	1.64	0.88	0.26	0.85	0.02	0.81	0.01	0.78	0.01
DeepPruner_Best	walker4	5.97	1.42	7.72	3.31	0.81	0.32	0.73	0.19	0.66	0.14	0.59	0.11	5.32	2.69	7.73	4.99	0.65	0.42	0.54	0.31	0.51	0.26	0.48	0.24	6.38	0.63	7.71	1.51	0.9	0.25	0.84	0.11	0.76	0.06	0.66	0.03
DeepPruner_Best	windmills4	0.63	0.49	1.22	0.81	0.28	0.32	0.14	0.06	0.08	0.03	0.03	0.01	1.31	0.87	2.14	1.47	0.53	0.48	0.32	0.21	0.2	0.1	0.14	0.05	0.45	0.39	0.8	0.49	0.22	0.28	0.08	0.02	0.04	0	0.01	0
DeepPruner_Best	youngster_room10	2.24	0.5	8.24	1.49	0.48	0.22	0.23	0.09	0.14	0.03	0.07	0.02	2.64	1.12	8.71	2.57	0.65	0.52	0.35	0.25	0.2	0.1	0.1	0.05	2.04	0.21	8	0.3	0.4	0.07	0.18	0.01	0.11	0	0.06	0
DeepPruner_Best	youngster_room14	2.66	0.79	4.36	2	0.66	0.31	0.52	0.14	0.36	0.07	0.23	0.04	2.12	1.36	3.74	3.02	0.64	0.48	0.44	0.25	0.27	0.13	0.16	0.08	2.94	0.48	4.66	1.11	0.67	0.21	0.56	0.08	0.4	0.04	0.26	0.01
DeepPruner_Best	youngster_room4	0.46	0.28	0.87	0.73	0.28	0.1	0.1	0.03	0.02	0.01	0.01	0.01	0.73	0.54	1.35	1.22	0.42	0.25	0.22	0.09	0.06	0.04	0.02	0.02	0.33	0.15	0.46	0.2	0.21	0.02	0.04	0	0	0	0	0
DeepPruner_Best	youngster_room7	0.77	0.49	1.69	1.31	0.37	0.18	0.17	0.07	0.07	0.04	0.04	0.02	1.18	0.89	2.37	2	0.47	0.36	0.3	0.17	0.13	0.1	0.07	0.05	0.57	0.28	1.21	0.75	0.33	0.08	0.11	0.03	0.04	0.01	0.02	0.01
DeepPruner_Best	youngster_room9	0.45	0.29	0.97	0.87	0.26	0.12	0.07	0.03	0.02	0.01	0.01	0.01	0.76	0.64	1.65	1.56	0.4	0.33	0.19	0.1	0.06	0.04	0.03	0.03	0.32	0.13	0.42	0.19	0.19	0.02	0.03	0	0	0	0	0
DeepPruner_Best	dining_room_1_13	1.14	0.34	1.97	0.92	0.43	0.14	0.32	0.07	0.21	0.02	0.07	0.01	1.19	0.65	2.13	1.46	0.5	0.34	0.34	0.17	0.22	0.06	0.06	0.01	1.1	0.15	1.86	0.25	0.39	0.02	0.31	0.01	0.21	0	0.07	0
DeepPruner_Best	living_room_3_2	0.96	0.42	1.47	0.88	0.58	0.19	0.27	0.04	0.12	0.02	0.03	0.01	1.43	0.8	2.25	1.72	0.62	0.3	0.36	0.17	0.23	0.1	0.11	0.06	0.83	0.31	1.15	0.38	0.57	0.16	0.24	0.01	0.09	0	0.01	0
DeepPruner_Best	office_top4	1.94	0.43	8.79	0.56	0.35	0.33	0.17	0.07	0.08	0	0.05	0	2.4	0.52	10.55	0.74	0.42	0.37	0.26	0.17	0.07	0.01	0.05	0	1.73	0.39	7.87	0.46	0.32	0.31	0.13	0.02	0.08	0	0.05	0
DeepPruner_Best	sleeping_room_1_13	5.13	0.3	17.01	0.75	0.52	0.1	0.35	0.03	0.2	0.01	0.14	0.01	4.41	0.62	15.69	1.42	0.56	0.29	0.36	0.12	0.18	0.05	0.12	0.03	5.38	0.19	17.44	0.26	0.5	0.04	0.35	0	0.21	0	0.14	0
DeepPruner_Best	dining_room_1_5	1.2	0.99	2.68	2.47	0.49	0.43	0.27	0.19	0.12	0.09	0.06	0.05	1.78	1.54	3.67	3.46	0.58	0.5	0.37	0.29	0.2	0.16	0.11	0.1	0.64	0.46	1.06	0.64	0.41	0.37	0.17	0.09	0.05	0.01	0.02	0
DeepPruner_Best	dining_room_1_7	5.13	2.84	10.08	7.42	0.66	0.33	0.47	0.23	0.33	0.17	0.24	0.14	5.85	4.41	10.87	9.41	0.71	0.55	0.54	0.37	0.4	0.26	0.29	0.21	4.29	1.03	9.09	4.04	0.61	0.08	0.39	0.06	0.26	0.05	0.19	0.05
DeepPruner_Best	dining_room_1_9	0.69	0.6	1.5	1.48	0.38	0.3	0.16	0.12	0.06	0.04	0.02	0.02	1	0.91	2.03	2.01	0.49	0.44	0.27	0.21	0.1	0.08	0.05	0.04	0.35	0.26	0.48	0.37	0.26	0.16	0.05	0.02	0	0	0	0
DeepPruner_Best	floating_cubes1	3.42	0.79	4.63	1.9	0.61	0.26	0.58	0.14	0.55	0.09	0.46	0.06	3.44	1.39	4.76	2.79	0.59	0.36	0.54	0.26	0.52	0.19	0.46	0.14	3.41	0.34	4.53	0.63	0.63	0.19	0.6	0.05	0.58	0.01	0.46	0
DeepPruner_Best	fruit1	1.25	0.64	2.06	1.1	0.47	0.34	0.32	0.15	0.2	0.07	0.1	0.02	1.34	0.85	1.99	1.34	0.62	0.53	0.43	0.25	0.22	0.1	0.08	0.03	1.2	0.53	2.1	0.95	0.39	0.24	0.26	0.09	0.19	0.06	0.12	0.01
DeepPruner_Best	fruit6	1.07	0.46	2.44	1.66	0.26	0.13	0.19	0.06	0.15	0.04	0.12	0.03	1.97	1.26	3.61	3.07	0.52	0.37	0.35	0.21	0.26	0.12	0.21	0.09	0.71	0.13	1.76	0.2	0.16	0.03	0.13	0	0.11	0	0.09	0
DeepPruner_Best	fruit8	0.96	0.25	2.94	0.67	0.37	0.08	0.27	0.04	0.1	0.02	0.03	0.01	1.48	0.53	4.28	1.16	0.48	0.25	0.35	0.11	0.2	0.05	0.06	0.02	0.72	0.12	2.02	0.17	0.33	0.01	0.24	0	0.06	0	0.02	0
DeepPruner_Best	hacienda1	1	0.77	1.35	1.1	0.64	0.48	0.33	0.24	0.15	0.08	0	0	0.95	0.79	1.4	1.22	0.52	0.43	0.31	0.26	0.16	0.11	0.01	0.01	1.05	0.74	1.3	0.94	0.78	0.54	0.36	0.23	0.14	0.05	0	0
DeepPruner_Best	hacienda4	0.59	0.53	0.9	0.8	0.33	0.32	0.19	0.16	0.04	0.01	0	0	0.65	0.58	1.02	0.93	0.37	0.33	0.2	0.19	0.07	0.03	0	0	0.52	0.48	0.73	0.61	0.3	0.31	0.18	0.11	0.02	0	0	0
DeepPruner_Best	hacienda8	2.73	1.64	10.29	6.21	0.46	0.49	0.15	0.13	0.08	0.05	0.07	0.04	2.99	1.74	12.17	6.72	0.52	0.51	0.23	0.21	0.06	0.05	0.05	0.04	2.64	1.6	9.5	6.01	0.43	0.48	0.13	0.1	0.09	0.05	0.08	0.04
DeepPruner_Best	landscape1_5	0.96	0.94	3.6	3.49	0.25	0.2	0.12	0.11	0.07	0.08	0.05	0.05	1.8	1.73	5.64	5.36	0.36	0.33	0.2	0.18	0.13	0.13	0.09	0.1	0.42	0.43	0.87	1.19	0.18	0.11	0.07	0.06	0.04	0.04	0.01	0.02
DeepPruner_Best	landscape1_6	0.68	0.62	2.27	2.23	0.2	0.17	0.1	0.09	0.05	0.05	0.03	0.03	1.18	1.14	3.35	3.29	0.32	0.3	0.18	0.17	0.11	0.1	0.07	0.06	0.26	0.19	0.4	0.29	0.1	0.06	0.03	0.01	0	0	0	0
DeepPruner_Best	landscape3_2	1.91	1.86	4.86	4.74	0.33	0.32	0.24	0.24	0.21	0.21	0.2	0.2	2.05	2	6.39	6.21	0.39	0.38	0.22	0.22	0.15	0.15	0.13	0.13	1.81	1.75	3.37	3.32	0.29	0.28	0.25	0.25	0.25	0.24	0.24	0.24
DeepPruner_Best	landscape5_2	3.8	0.61	9.71	0.73	0.62	0.5	0.33	0.13	0.18	0.01	0.14	0	3.73	0.97	9.7	1.13	0.7	0.75	0.44	0.41	0.18	0.07	0.1	0	3.82	0.53	9.71	0.61	0.6	0.45	0.31	0.08	0.18	0	0.14	0
DeepPruner_Best	living_room_1_1	0.83	0.51	1.28	0.95	0.45	0.27	0.27	0.13	0.13	0.06	0.01	0.01	1.08	0.79	1.57	1.28	0.57	0.45	0.37	0.23	0.2	0.1	0.03	0.02	0.53	0.19	0.82	0.27	0.3	0.07	0.16	0.01	0.06	0	0	0
DeepPruner_Best	living_room_2_3	0.48	0.28	0.67	0.42	0.38	0.16	0.12	0.03	0.02	0	0	0	0.73	0.47	1.01	0.65	0.49	0.33	0.28	0.1	0.09	0.02	0	0	0.41	0.24	0.55	0.33	0.35	0.12	0.08	0.02	0	0	0	0
DeepPruner_Fast	abstract_bowls_1	1.96	1.14	3.39	2.67	0.74	0.45	0.5	0.22	0.25	0.11	0.13	0.06	2.36	1.83	4.22	3.71	0.73	0.61	0.5	0.36	0.27	0.2	0.18	0.12	1.61	0.54	2.46	1.19	0.74	0.32	0.49	0.1	0.24	0.03	0.1	0.01
DeepPruner_Fast	abstract_bowls_14	3.44	0.86	5.29	2	0.82	0.39	0.66	0.2	0.45	0.07	0.29	0.04	3.08	1.5	5.05	3	0.82	0.58	0.64	0.35	0.39	0.16	0.21	0.08	3.66	0.47	5.43	0.98	0.82	0.27	0.67	0.11	0.49	0.02	0.35	0.01
DeepPruner_Fast	bones_3	6.84	5.69	12.59	11.55	0.77	0.68	0.59	0.5	0.4	0.34	0.28	0.24	7.79	7.13	13.71	13.22	0.79	0.75	0.63	0.57	0.43	0.4	0.32	0.3	4.78	2.53	9.7	6.5	0.73	0.52	0.52	0.35	0.34	0.21	0.19	0.12
DeepPruner_Fast	bones_6	8.3	6.03	15.55	12.85	0.82	0.69	0.66	0.47	0.48	0.31	0.33	0.23	8.97	6.61	16.31	13.62	0.83	0.74	0.67	0.53	0.48	0.34	0.35	0.25	5.76	3.86	12.28	9.45	0.8	0.49	0.64	0.28	0.46	0.21	0.26	0.16
DeepPruner_Fast	Chairs4	3.52	3.28	4.95	5	0.76	0.66	0.62	0.51	0.5	0.45	0.39	0.36	3.93	3.77	5.25	5.39	0.82	0.73	0.69	0.59	0.58	0.52	0.45	0.43	2.24	1.76	3.89	3.54	0.61	0.44	0.39	0.26	0.27	0.21	0.2	0.16
DeepPruner_Fast	chess_8	1.96	0.85	3.42	1.68	0.59	0.4	0.38	0.2	0.25	0.1	0.18	0.04	2.15	1.35	3.53	2.29	0.68	0.62	0.49	0.37	0.29	0.18	0.19	0.08	1.77	0.36	3.32	0.69	0.5	0.18	0.27	0.04	0.21	0.02	0.18	0.01
DeepPruner_Fast	childroom_1	0.93	0.45	1.89	0.98	0.47	0.23	0.21	0.07	0.08	0.03	0.05	0.01	1.15	0.72	2.2	1.46	0.53	0.39	0.3	0.16	0.13	0.06	0.06	0.03	0.78	0.26	1.64	0.35	0.43	0.11	0.14	0.01	0.05	0	0.04	0
DeepPruner_Fast	childroom_12	3.28	1.08	6.32	3.35	0.63	0.29	0.42	0.13	0.3	0.07	0.22	0.05	4.24	1.78	7.46	4.57	0.69	0.45	0.52	0.22	0.38	0.12	0.28	0.1	2.33	0.39	4.94	1.31	0.56	0.13	0.32	0.04	0.22	0.02	0.15	0.01
DeepPruner_Fast	childroom_2	2.59	1.7	7.34	6.44	0.64	0.41	0.47	0.23	0.29	0.13	0.11	0.07	3.9	3.09	10.33	9.16	0.72	0.65	0.54	0.42	0.33	0.25	0.16	0.13	1.38	0.42	2.23	1.47	0.58	0.19	0.39	0.05	0.26	0.02	0.07	0.01
DeepPruner_Fast	childroom_4	0.59	0.48	1.01	0.86	0.39	0.34	0.18	0.1	0.03	0.02	0.01	0	0.73	0.64	1.27	1.14	0.48	0.47	0.24	0.17	0.05	0.03	0.01	0.01	0.44	0.32	0.63	0.41	0.31	0.21	0.11	0.02	0.01	0	0	0
DeepPruner_Fast	childroom_6	0.88	0.53	1.55	1.31	0.6	0.24	0.23	0.08	0.06	0.04	0.03	0.02	1.13	0.8	2.09	1.87	0.64	0.34	0.3	0.14	0.11	0.07	0.05	0.04	0.66	0.29	0.85	0.46	0.57	0.14	0.17	0.02	0.02	0	0	0
DeepPruner_Fast	childroom_9	0.84	0.71	1.97	1.83	0.39	0.32	0.19	0.14	0.08	0.06	0.04	0.03	1.56	1.39	3.12	2.96	0.6	0.57	0.37	0.33	0.18	0.14	0.09	0.07	0.44	0.32	0.73	0.47	0.26	0.18	0.09	0.04	0.02	0.01	0	0
DeepPruner_Fast	cloth4	3.22	0.49	8	0.63	0.91	0.35	0.65	0.1	0.48	0.01	0.14	0	4.25	0.78	10.51	0.99	0.89	0.57	0.69	0.33	0.53	0.04	0.21	0	2.95	0.41	7.19	0.48	0.91	0.29	0.64	0.04	0.46	0	0.12	0
DeepPruner_Fast	cloth6	2.46	0.52	4.16	1.03	0.62	0.28	0.47	0.11	0.34	0.04	0.21	0.01	2.54	0.96	4.21	1.71	0.67	0.5	0.5	0.27	0.37	0.12	0.2	0.04	2.42	0.31	4.13	0.43	0.6	0.17	0.46	0.04	0.33	0	0.21	0
DeepPruner_Fast	cloth7	9.7	1.04	18.24	2.62	0.69	0.39	0.54	0.18	0.45	0.08	0.44	0.05	5.23	1.64	12.82	3.59	0.65	0.57	0.43	0.3	0.28	0.14	0.25	0.09	13.47	0.53	21.79	1.35	0.72	0.25	0.63	0.08	0.6	0.04	0.6	0.02
DeepPruner_Fast	coral6	1.92	0.9	3.41	2.02	0.56	0.32	0.39	0.17	0.27	0.1	0.17	0.05	2.96	1.73	4.53	3.14	0.72	0.57	0.55	0.36	0.42	0.23	0.29	0.13	1.27	0.39	2.47	0.7	0.47	0.17	0.29	0.05	0.17	0.02	0.09	0.01
DeepPruner_Fast	dining_room_1_1	8.19	7.41	13.88	13.58	0.82	0.72	0.7	0.6	0.55	0.47	0.43	0.35	9.03	9.4	15.42	15.96	0.85	0.8	0.73	0.68	0.56	0.52	0.42	0.41	7	4.58	11.33	9.18	0.77	0.62	0.65	0.49	0.54	0.39	0.44	0.27
DeepPruner_Fast	office_top5	1.16	0.57	1.73	1.15	0.62	0.29	0.38	0.13	0.16	0.05	0.06	0.03	1.46	1.09	2.23	1.8	0.66	0.56	0.42	0.3	0.21	0.14	0.12	0.08	1	0.3	1.39	0.53	0.59	0.15	0.36	0.03	0.13	0.01	0.02	0
DeepPruner_Fast	park1	0.73	0.53	1.05	0.89	0.57	0.3	0.19	0.13	0.05	0.04	0.01	0.01	0.87	0.76	1.31	1.19	0.54	0.47	0.29	0.23	0.1	0.08	0.02	0.01	0.58	0.29	0.66	0.37	0.6	0.13	0.09	0.02	0	0	0	0
DeepPruner_Fast	park10	1.67	1.44	3.39	3.15	0.57	0.47	0.35	0.3	0.2	0.17	0.11	0.1	2.25	2.07	4.12	3.9	0.69	0.67	0.46	0.44	0.28	0.25	0.16	0.15	0.63	0.29	1.25	0.55	0.37	0.12	0.15	0.03	0.05	0.01	0.02	0
DeepPruner_Fast	park6	2.23	2.04	5.14	5.32	0.62	0.41	0.37	0.24	0.22	0.16	0.12	0.12	4.76	5.1	8.49	9	0.8	0.72	0.62	0.55	0.46	0.42	0.3	0.33	0.94	0.49	1.82	1.28	0.53	0.25	0.24	0.08	0.1	0.03	0.03	0.01
DeepPruner_Fast	person1_1	16	1.83	25.15	6.01	0.75	0.22	0.59	0.13	0.52	0.09	0.5	0.08	13.01	5.11	21.89	10.68	0.68	0.47	0.49	0.31	0.44	0.24	0.43	0.22	16.94	0.79	26.1	3.37	0.77	0.15	0.62	0.07	0.54	0.05	0.53	0.03
DeepPruner_Fast	person1_3	3.51	2.07	10.05	7.72	0.49	0.38	0.35	0.21	0.24	0.12	0.16	0.07	6.3	4.38	14.76	12.24	0.67	0.6	0.5	0.39	0.35	0.25	0.25	0.16	2.01	0.84	6.22	3.38	0.4	0.26	0.27	0.12	0.18	0.05	0.11	0.03
DeepPruner_Fast	person1_8	9.2	2.95	17.86	8.67	0.7	0.39	0.54	0.21	0.42	0.16	0.37	0.14	9.04	4.38	18.78	10.8	0.69	0.53	0.47	0.31	0.41	0.24	0.35	0.22	9.24	2.6	17.63	8.07	0.71	0.35	0.56	0.19	0.43	0.14	0.37	0.12
DeepPruner_Fast	person2_5	1.36	0.49	1.93	0.91	0.69	0.3	0.51	0.1	0.21	0.03	0.06	0.01	1.49	0.83	2.24	1.42	0.66	0.51	0.46	0.25	0.25	0.08	0.08	0.02	1.28	0.3	1.73	0.41	0.71	0.19	0.53	0.02	0.19	0	0.04	0
DeepPruner_Fast	person3_10	1.06	0.62	2.18	1.6	0.51	0.3	0.29	0.11	0.12	0.05	0.03	0.02	1.94	1.35	3.79	2.95	0.66	0.55	0.42	0.3	0.26	0.14	0.11	0.07	0.73	0.35	1.11	0.57	0.46	0.2	0.25	0.05	0.08	0.01	0.01	0
DeepPruner_Fast	person3_3	2.7	0.66	4.98	2.04	0.62	0.25	0.44	0.11	0.29	0.04	0.21	0.02	3.96	1.71	6.86	4	0.77	0.55	0.59	0.33	0.37	0.15	0.25	0.08	2.28	0.3	4.16	0.43	0.56	0.14	0.39	0.03	0.27	0	0.2	0
DeepPruner_Fast	person3_4	3.22	1.3	7.86	4.21	0.56	0.36	0.35	0.17	0.16	0.07	0.13	0.05	4.47	2.81	9.56	6.91	0.64	0.54	0.41	0.33	0.22	0.17	0.18	0.13	2.51	0.44	6.7	0.88	0.51	0.25	0.32	0.08	0.12	0.02	0.1	0
DeepPruner_Fast	plant_vintage12	3.05	1.82	5.26	3.85	0.7	0.54	0.5	0.34	0.34	0.19	0.25	0.13	3.11	2.53	5.48	4.73	0.7	0.67	0.51	0.46	0.34	0.28	0.25	0.19	2.94	0.56	4.84	1.13	0.7	0.3	0.49	0.12	0.36	0.04	0.25	0.01
DeepPruner_Fast	plant_vintage14	5.76	0.43	13.78	0.68	0.87	0.22	0.71	0.09	0.48	0.03	0.26	0	4.09	0.78	13.46	1.13	0.78	0.51	0.58	0.26	0.36	0.08	0.13	0.01	6.44	0.28	13.91	0.37	0.9	0.1	0.76	0.01	0.52	0	0.31	0
DeepPruner_Fast	plant_vintage15	6.24	0.41	15.69	0.7	0.83	0.23	0.67	0.09	0.42	0.03	0.22	0	4.96	0.77	15.35	1.13	0.71	0.5	0.54	0.25	0.34	0.09	0.13	0.01	6.81	0.25	15.84	0.37	0.89	0.11	0.72	0.02	0.45	0	0.26	0
DeepPruner_Fast	plant_vintage2	1.47	0.49	1.89	0.63	0.85	0.38	0.58	0.09	0.22	0.01	0.05	0	1.35	0.69	1.81	0.88	0.78	0.59	0.54	0.23	0.19	0.02	0.05	0	1.55	0.37	1.92	0.44	0.89	0.25	0.6	0.01	0.24	0	0.06	0
DeepPruner_Fast	plant_vintage4	2.93	0.56	7.48	1.01	0.81	0.29	0.55	0.13	0.37	0.06	0.17	0.01	2.71	0.91	8.22	1.43	0.77	0.51	0.53	0.27	0.32	0.13	0.11	0.03	3.06	0.35	7.01	0.64	0.84	0.16	0.57	0.04	0.4	0.03	0.21	0
DeepPruner_Fast	plant_vintage7	1.77	1.44	3.54	3.3	0.66	0.45	0.36	0.23	0.18	0.14	0.12	0.1	2.48	2.31	4.59	4.43	0.69	0.64	0.45	0.38	0.27	0.24	0.19	0.18	0.93	0.41	1.51	0.72	0.63	0.23	0.25	0.04	0.08	0.01	0.04	0
DeepPruner_Fast	roundntwist4	2.92	1.52	3.74	1.88	0.87	0.76	0.76	0.59	0.6	0.32	0.24	0.02	2.06	1.29	2.84	1.73	0.79	0.66	0.61	0.44	0.42	0.28	0.12	0.02	4.21	1.85	4.78	2.07	1	0.9	0.99	0.82	0.85	0.38	0.42	0.01
DeepPruner_Fast	ScifiKnot1	1.47	0.68	2.63	1.45	0.5	0.27	0.33	0.15	0.2	0.09	0.14	0.04	2.06	1.28	3.26	2.24	0.65	0.5	0.49	0.3	0.29	0.2	0.19	0.09	1.1	0.31	2.15	0.57	0.4	0.12	0.24	0.05	0.14	0.02	0.11	0
DeepPruner_Fast	ScifiKnot4	2.9	1.04	5.18	2.88	0.67	0.39	0.51	0.19	0.37	0.1	0.22	0.05	3.96	2.69	6.87	5.52	0.75	0.64	0.58	0.45	0.44	0.3	0.28	0.17	2.54	0.48	4.46	0.85	0.65	0.3	0.49	0.1	0.35	0.03	0.19	0.01
DeepPruner_Fast	sleeping_room_1_11	0.51	0.37	0.87	0.68	0.3	0.2	0.13	0.05	0.04	0.01	0	0	0.85	0.68	1.34	1.19	0.53	0.45	0.3	0.17	0.09	0.04	0.01	0.01	0.38	0.25	0.61	0.33	0.21	0.11	0.07	0.01	0.03	0	0	0
DeepPruner_Fast	living_room_3_5	1.93	1.3	3.6	2.55	0.61	0.52	0.4	0.32	0.23	0.16	0.14	0.07	2.35	1.93	4.08	3.41	0.68	0.64	0.48	0.45	0.29	0.25	0.18	0.14	1.55	0.74	3.12	1.38	0.55	0.41	0.32	0.21	0.17	0.08	0.1	0.01
DeepPruner_Fast	living_room_3_9	0.9	0.36	1.22	0.54	0.67	0.21	0.3	0.04	0.09	0	0.01	0	1	0.5	1.36	0.8	0.67	0.38	0.37	0.11	0.11	0.01	0.01	0	0.86	0.29	1.13	0.35	0.68	0.13	0.26	0.01	0.08	0	0.01	0
DeepPruner_Fast	mannequins_10	7.21	10.22	15.78	19.77	0.67	0.59	0.51	0.43	0.39	0.36	0.3	0.32	9.56	13.83	18.96	23.54	0.75	0.74	0.59	0.58	0.46	0.47	0.36	0.41	3.1	3.94	7.49	10.3	0.53	0.33	0.37	0.17	0.27	0.16	0.18	0.16
DeepPruner_Fast	mannequins_12	6.29	2.34	9.29	5.87	0.74	0.45	0.64	0.23	0.58	0.15	0.51	0.13	5.91	4.04	9.72	7.97	0.65	0.64	0.52	0.39	0.45	0.27	0.38	0.23	6.66	0.68	8.86	2.46	0.83	0.26	0.76	0.07	0.72	0.04	0.64	0.03
DeepPruner_Fast	mannequins_2	4.53	2.01	7.6	5.02	0.67	0.51	0.57	0.31	0.5	0.18	0.34	0.1	4.07	2.8	7.65	6.08	0.63	0.64	0.52	0.42	0.41	0.26	0.26	0.15	5.44	0.45	7.48	1.43	0.75	0.25	0.69	0.08	0.66	0.01	0.49	0
DeepPruner_Fast	mannequins_5	1.37	0.85	2.29	1.74	0.56	0.4	0.39	0.2	0.19	0.09	0.09	0.05	1.57	1.21	2.63	2.21	0.58	0.55	0.42	0.31	0.22	0.14	0.12	0.08	1.07	0.33	1.68	0.59	0.53	0.19	0.33	0.04	0.14	0.01	0.05	0
DeepPruner_Fast	mannequins_9	2.92	1.87	5.33	4.43	0.6	0.51	0.45	0.31	0.38	0.17	0.21	0.09	2.97	2.46	5.6	5.19	0.63	0.62	0.46	0.42	0.36	0.24	0.19	0.13	2.8	0.56	4.68	1.84	0.53	0.25	0.45	0.08	0.42	0.03	0.27	0.01
DeepPruner_Fast	Minicubes4	4.13	3.86	6.86	6.62	0.66	0.59	0.51	0.44	0.39	0.36	0.32	0.3	3.95	3.66	6.7	6.38	0.68	0.64	0.53	0.47	0.4	0.36	0.3	0.28	4.45	4.24	7.15	7.04	0.62	0.5	0.47	0.38	0.37	0.35	0.35	0.34
DeepPruner_Fast	Minicubes5	4.19	3.63	6.85	6.23	0.73	0.62	0.56	0.45	0.41	0.36	0.33	0.31	3.31	2.97	5.58	5.3	0.7	0.65	0.55	0.45	0.38	0.32	0.27	0.25	5.45	4.59	8.36	7.37	0.76	0.57	0.57	0.44	0.45	0.41	0.41	0.39
DeepPruner_Fast	Minicubes9	4.13	1.27	5.64	2.46	0.81	0.52	0.69	0.3	0.56	0.15	0.43	0.08	3.12	1.83	4.77	3.18	0.75	0.67	0.6	0.44	0.44	0.26	0.28	0.13	5.43	0.55	6.59	0.92	0.88	0.32	0.81	0.11	0.71	0.02	0.62	0.01
DeepPruner_Fast	moto3	0.99	0.67	1.6	1.21	0.5	0.33	0.29	0.18	0.13	0.08	0.05	0.03	1.38	1.06	2.1	1.69	0.61	0.5	0.41	0.32	0.22	0.16	0.11	0.06	0.68	0.36	1.02	0.58	0.41	0.19	0.2	0.07	0.06	0.01	0.01	0
DeepPruner_Fast	music1_1	2.97	0.9	6.04	1.83	0.64	0.35	0.47	0.21	0.34	0.13	0.2	0.05	3.7	1.6	7.51	2.69	0.74	0.64	0.55	0.41	0.38	0.24	0.22	0.11	2.6	0.55	5.15	1.17	0.58	0.21	0.44	0.11	0.31	0.07	0.18	0.03
DeepPruner_Fast	music1_6	3.11	2.35	6.12	5.89	0.69	0.52	0.54	0.35	0.37	0.22	0.23	0.13	4.06	3.6	7.58	7.58	0.73	0.7	0.6	0.51	0.44	0.34	0.29	0.21	1.71	0.51	2.78	1.01	0.63	0.25	0.46	0.11	0.28	0.04	0.13	0.01
DeepPruner_Fast	music1_7	0.9	0.54	1.44	1.02	0.47	0.27	0.28	0.12	0.13	0.06	0.03	0.02	1.49	1.14	2.18	1.75	0.64	0.56	0.43	0.34	0.28	0.18	0.1	0.06	0.65	0.29	0.96	0.42	0.4	0.14	0.22	0.03	0.07	0	0	0
DeepPruner_Fast	music1_9	7.34	1.74	12.83	4.78	0.75	0.44	0.66	0.22	0.55	0.12	0.43	0.09	6.5	2.95	12.07	6.95	0.69	0.66	0.56	0.43	0.44	0.22	0.3	0.13	7.58	1.4	13.04	3.98	0.76	0.37	0.69	0.16	0.58	0.09	0.46	0.07
DeepPruner_Fast	nest5	5.91	4.49	19.56	19.27	0.78	0.6	0.63	0.42	0.47	0.31	0.32	0.22	6.92	6.48	24.41	24.47	0.78	0.78	0.65	0.6	0.5	0.44	0.35	0.31	4.7	2.12	11.29	9.99	0.79	0.39	0.61	0.22	0.43	0.16	0.29	0.11
DeepPruner_Fast	office1	2.35	0.46	5.41	0.63	0.72	0.31	0.47	0.1	0.25	0.01	0.1	0	1.29	0.67	1.91	0.87	0.63	0.52	0.44	0.21	0.21	0.04	0.04	0	2.94	0.35	6.6	0.43	0.77	0.19	0.49	0.03	0.28	0	0.14	0
DeepPruner_Fast	office12	4.69	1.44	8.21	4	0.7	0.34	0.56	0.17	0.4	0.11	0.28	0.08	7.1	2.95	10.7	6.24	0.8	0.59	0.65	0.32	0.54	0.23	0.41	0.17	3.41	0.64	6.51	1.95	0.64	0.21	0.51	0.1	0.33	0.05	0.22	0.03
DeepPruner_Fast	office14	3.01	1.72	6.92	5.13	0.62	0.43	0.41	0.25	0.25	0.15	0.15	0.08	3.68	2.97	7.8	7.05	0.75	0.66	0.55	0.44	0.33	0.27	0.2	0.16	2.54	0.82	6.22	3.13	0.52	0.26	0.32	0.12	0.19	0.07	0.12	0.02
DeepPruner_Fast	office2	3.28	0.34	8.3	0.45	0.85	0.19	0.51	0.04	0.22	0	0.11	0	1.55	0.55	3.68	0.69	0.75	0.48	0.46	0.13	0.18	0	0.04	0	3.9	0.27	9.43	0.33	0.88	0.09	0.53	0.01	0.23	0	0.13	0
DeepPruner_Fast	sleeping_room_1_15	0.89	0.47	1.25	0.73	0.53	0.3	0.35	0.13	0.12	0.03	0.01	0	1.03	0.72	1.42	1.01	0.61	0.49	0.4	0.26	0.17	0.06	0.01	0	0.77	0.27	1.11	0.39	0.46	0.16	0.32	0.03	0.09	0	0	0
DeepPruner_Fast	sleeping_room_1_3	0.81	0.61	1.08	0.9	0.58	0.43	0.32	0.19	0.05	0.03	0	0.01	1.01	0.87	1.41	1.27	0.63	0.61	0.39	0.33	0.11	0.06	0.02	0.02	0.74	0.53	0.94	0.74	0.57	0.38	0.3	0.15	0.04	0.02	0	0
DeepPruner_Fast	sleeping_room_1_7	0.94	0.81	1.55	1.46	0.54	0.47	0.25	0.18	0.11	0.08	0.04	0.03	1.39	1.36	2.23	2.31	0.63	0.6	0.37	0.31	0.2	0.21	0.1	0.1	0.75	0.56	1.12	0.82	0.5	0.41	0.19	0.12	0.07	0.03	0.02	0
DeepPruner_Fast	spaceStation2	10.84	10.9	14.01	14.22	0.81	0.82	0.73	0.73	0.7	0.7	0.69	0.69	4.84	4.92	8.41	8.53	0.66	0.69	0.46	0.46	0.37	0.37	0.34	0.35	13.89	13.94	16.13	16.37	0.89	0.89	0.86	0.87	0.86	0.86	0.86	0.86
DeepPruner_Fast	stack_circles4	15.66	1.61	24.55	4.04	0.79	0.39	0.66	0.21	0.58	0.14	0.55	0.1	8.75	2.88	17.19	5.98	0.75	0.57	0.59	0.35	0.43	0.24	0.36	0.18	19.51	0.9	27.82	2.35	0.82	0.28	0.69	0.13	0.66	0.09	0.66	0.06
DeepPruner_Fast	stack_circles9	12.92	1.92	21.14	4.63	0.79	0.34	0.71	0.24	0.67	0.17	0.61	0.12	7.51	3.21	15.11	6.25	0.66	0.51	0.51	0.37	0.43	0.28	0.39	0.22	16.32	1.12	24.18	3.22	0.87	0.24	0.83	0.16	0.81	0.09	0.76	0.06
DeepPruner_Fast	time_travellers_10	33.22	8.17	43.55	18.29	0.81	0.43	0.68	0.32	0.61	0.26	0.58	0.23	26.15	12.98	38.42	24.69	0.8	0.7	0.64	0.51	0.52	0.37	0.46	0.3	36.1	6.21	45.47	14.92	0.81	0.33	0.7	0.24	0.64	0.21	0.63	0.2
DeepPruner_Fast	time_travellers_13	9.35	1.6	12.15	4.37	0.83	0.34	0.74	0.19	0.64	0.11	0.62	0.08	6.81	3.13	10.31	6.54	0.71	0.57	0.56	0.39	0.47	0.24	0.45	0.18	11.1	0.55	13.27	1.68	0.91	0.19	0.86	0.06	0.76	0.03	0.74	0.02
DeepPruner_Fast	time_travellers_15	12.36	3.42	16.9	9.13	0.78	0.33	0.66	0.2	0.57	0.15	0.56	0.13	10.04	6.76	15.93	13	0.73	0.62	0.56	0.42	0.43	0.31	0.4	0.27	13.69	1.49	17.43	5.81	0.81	0.17	0.72	0.07	0.65	0.06	0.65	0.05
DeepPruner_Fast	time_travellers_2	7.07	2.65	10.43	6.44	0.74	0.47	0.62	0.31	0.54	0.2	0.49	0.15	6.08	4.26	10.23	8.52	0.68	0.66	0.53	0.48	0.41	0.32	0.36	0.24	7.79	1.49	10.57	4.34	0.78	0.32	0.68	0.19	0.63	0.12	0.58	0.08
DeepPruner_Fast	time_travellers_20	5.82	0.58	7.21	1.61	0.85	0.21	0.76	0.09	0.71	0.05	0.6	0.03	4.74	1.29	6.62	2.74	0.72	0.47	0.6	0.26	0.54	0.14	0.46	0.09	6.37	0.22	7.49	0.3	0.91	0.08	0.85	0.01	0.79	0	0.68	0
DeepPruner_Fast	time_travellers_24	42.05	6.52	49.72	17.02	0.93	0.39	0.87	0.27	0.8	0.21	0.75	0.17	30.26	9.22	42.55	20.85	0.86	0.62	0.75	0.46	0.64	0.34	0.56	0.26	46.07	5.6	51.93	15.5	0.96	0.31	0.91	0.2	0.85	0.16	0.81	0.15
DeepPruner_Fast	time_travellers_25	14.4	4.74	21.97	11.56	0.73	0.47	0.62	0.31	0.54	0.24	0.52	0.19	13.07	6.32	21	13.23	0.76	0.63	0.62	0.45	0.5	0.33	0.46	0.26	15.29	3.7	22.58	10.31	0.71	0.37	0.62	0.22	0.57	0.18	0.56	0.14
DeepPruner_Fast	time_travellers_3	11.98	3.81	16.85	10.76	0.8	0.46	0.7	0.29	0.62	0.21	0.59	0.15	9.57	5.59	15.53	12.57	0.76	0.65	0.63	0.48	0.51	0.35	0.45	0.25	13.78	2.49	17.77	9.19	0.84	0.32	0.75	0.16	0.71	0.1	0.69	0.07
DeepPruner_Fast	twirls2	1.66	0.64	2.5	1.12	0.62	0.36	0.41	0.19	0.31	0.05	0.15	0.02	2	1.03	2.83	1.66	0.74	0.53	0.54	0.35	0.39	0.12	0.17	0.04	1.43	0.38	2.25	0.54	0.54	0.26	0.33	0.08	0.26	0	0.13	0
DeepPruner_Fast	twirls3	1.43	0.51	1.96	0.92	0.79	0.29	0.43	0.11	0.26	0.04	0.06	0.01	1.72	0.89	2.39	1.45	0.77	0.49	0.5	0.27	0.32	0.1	0.13	0.04	1.29	0.31	1.71	0.47	0.81	0.19	0.4	0.03	0.22	0.01	0.03	0
DeepPruner_Fast	voronoid_sphere6	6.28	6.95	12.21	13.7	0.7	0.55	0.45	0.37	0.31	0.29	0.25	0.26	7.94	9.32	13.89	16.02	0.72	0.68	0.52	0.51	0.4	0.39	0.33	0.35	3.48	2.98	8.68	8.47	0.66	0.33	0.33	0.15	0.16	0.12	0.12	0.11
DeepPruner_Fast	voronoid_sphere9	4.96	3.69	7.64	6.55	0.58	0.52	0.49	0.43	0.46	0.35	0.42	0.28	4.11	3.94	6.84	6.89	0.54	0.47	0.42	0.41	0.39	0.37	0.35	0.31	9.93	2.25	11.21	4.04	0.85	0.82	0.84	0.54	0.84	0.26	0.84	0.15
DeepPruner_Fast	walker4	6.25	2.06	7.74	4.17	0.84	0.4	0.75	0.28	0.69	0.21	0.63	0.17	5.32	3.46	7.39	5.73	0.73	0.56	0.58	0.42	0.51	0.34	0.48	0.31	6.83	1.2	7.95	2.79	0.91	0.3	0.86	0.19	0.8	0.13	0.72	0.09
DeepPruner_Fast	windmills4	1.21	0.48	1.6	0.84	0.82	0.3	0.43	0.09	0.14	0.04	0.03	0.01	1.67	1.04	2.35	1.59	0.76	0.58	0.51	0.32	0.28	0.16	0.14	0.05	1.08	0.33	1.31	0.44	0.83	0.22	0.41	0.03	0.11	0	0	0
DeepPruner_Fast	youngster_room10	1.09	0.72	2.5	1.92	0.43	0.29	0.26	0.14	0.13	0.06	0.05	0.03	2.09	1.57	4.02	3.3	0.64	0.58	0.44	0.35	0.27	0.18	0.12	0.08	0.61	0.32	1.2	0.49	0.32	0.15	0.17	0.04	0.06	0.01	0.02	0
DeepPruner_Fast	youngster_room14	2.88	1.18	4.58	2.27	0.73	0.5	0.55	0.3	0.38	0.15	0.25	0.07	2.47	1.76	4.1	3.24	0.74	0.62	0.51	0.38	0.31	0.22	0.2	0.12	3.1	0.87	4.82	1.51	0.73	0.44	0.57	0.25	0.41	0.1	0.28	0.03
DeepPruner_Fast	youngster_room4	0.7	0.47	1.29	1.01	0.39	0.26	0.2	0.1	0.07	0.03	0.02	0.01	1.01	0.87	1.8	1.63	0.51	0.49	0.31	0.23	0.12	0.07	0.04	0.04	0.55	0.28	0.94	0.44	0.34	0.15	0.14	0.03	0.04	0	0.01	0
DeepPruner_Fast	youngster_room7	1.21	0.77	2.21	1.62	0.54	0.34	0.33	0.15	0.13	0.09	0.08	0.05	1.65	1.25	2.86	2.3	0.62	0.55	0.42	0.27	0.2	0.15	0.12	0.1	0.99	0.53	1.79	1.13	0.5	0.23	0.29	0.09	0.09	0.05	0.05	0.03
DeepPruner_Fast	youngster_room9	0.73	0.5	1.29	1.12	0.54	0.28	0.19	0.09	0.04	0.03	0.02	0.01	1.1	0.96	2.06	1.91	0.58	0.54	0.31	0.22	0.1	0.09	0.05	0.04	0.57	0.3	0.74	0.47	0.52	0.16	0.14	0.03	0.01	0.01	0	0
DeepPruner_Fast	dining_room_1_13	1.43	0.7	2.2	1.74	0.64	0.33	0.46	0.14	0.24	0.05	0.07	0.02	1.54	1.12	2.46	2.28	0.66	0.62	0.48	0.3	0.27	0.1	0.07	0.04	1.36	0.45	2.02	1.31	0.63	0.16	0.44	0.03	0.22	0.02	0.07	0.01
DeepPruner_Fast	living_room_3_2	1.2	0.44	1.65	0.83	0.75	0.26	0.42	0.07	0.16	0.02	0.03	0.01	1.48	0.9	2.21	1.59	0.7	0.5	0.45	0.27	0.25	0.08	0.08	0.04	1.12	0.3	1.45	0.4	0.77	0.19	0.41	0.02	0.13	0	0.02	0
DeepPruner_Fast	office_top4	1.37	0.4	2.15	0.52	0.75	0.25	0.38	0.06	0.19	0	0.08	0	1.33	0.59	2.15	0.76	0.7	0.48	0.44	0.18	0.22	0.01	0.05	0	1.39	0.31	2.16	0.37	0.77	0.14	0.35	0.01	0.17	0	0.09	0
DeepPruner_Fast	sleeping_room_1_13	2.55	0.53	5.14	0.89	0.63	0.36	0.43	0.12	0.25	0.02	0.16	0.01	2.24	0.96	5.44	1.51	0.67	0.61	0.47	0.31	0.2	0.08	0.11	0.03	2.66	0.38	5.03	0.52	0.62	0.27	0.42	0.06	0.26	0	0.18	0
DeepPruner_Fast	dining_room_1_5	1.64	1.25	2.95	2.77	0.7	0.54	0.47	0.29	0.22	0.12	0.08	0.06	2.15	1.95	3.9	3.84	0.7	0.67	0.51	0.44	0.3	0.22	0.13	0.12	1.14	0.57	1.55	0.9	0.7	0.42	0.44	0.15	0.14	0.03	0.03	0.01
DeepPruner_Fast	dining_room_1_7	7	4.12	11.74	9.1	0.8	0.56	0.67	0.38	0.5	0.25	0.36	0.19	6.89	5.77	11.7	10.77	0.82	0.77	0.68	0.57	0.53	0.39	0.35	0.28	7.14	2.21	11.79	6.66	0.79	0.32	0.64	0.15	0.46	0.1	0.37	0.09
DeepPruner_Fast	dining_room_1_9	1.1	0.84	1.93	1.68	0.6	0.46	0.38	0.23	0.11	0.08	0.03	0.03	1.43	1.19	2.5	2.23	0.65	0.58	0.47	0.36	0.19	0.13	0.06	0.05	0.73	0.45	0.97	0.69	0.54	0.33	0.28	0.09	0.03	0.02	0	0
DeepPruner_Fast	floating_cubes1	3.77	1.94	4.91	3.07	0.74	0.54	0.61	0.42	0.57	0.35	0.51	0.2	3.76	2.49	5	3.73	0.77	0.61	0.61	0.49	0.53	0.41	0.48	0.3	3.77	1.52	4.84	2.46	0.73	0.49	0.61	0.37	0.6	0.31	0.52	0.12
DeepPruner_Fast	fruit1	1.5	0.92	1.99	1.41	0.84	0.52	0.51	0.25	0.25	0.15	0.07	0.03	1.67	1.06	2.22	1.54	0.81	0.6	0.6	0.37	0.29	0.16	0.08	0.03	1.41	0.85	1.85	1.33	0.85	0.48	0.46	0.19	0.23	0.14	0.06	0.02
DeepPruner_Fast	fruit6	1.49	0.88	2.93	1.96	0.41	0.38	0.26	0.2	0.19	0.09	0.15	0.04	2.56	1.97	4.12	3.48	0.69	0.71	0.52	0.49	0.34	0.26	0.24	0.14	1.05	0.43	2.28	0.72	0.3	0.24	0.16	0.09	0.13	0.02	0.12	0
DeepPruner_Fast	fruit8	1.57	0.5	4.21	0.94	0.45	0.28	0.3	0.12	0.15	0.04	0.07	0.01	1.94	0.97	4.55	1.5	0.59	0.57	0.42	0.32	0.27	0.11	0.09	0.03	1.4	0.29	4.04	0.48	0.38	0.15	0.24	0.02	0.1	0.01	0.06	0
DeepPruner_Fast	hacienda1	1.6	1.1	1.91	1.48	0.86	0.66	0.64	0.36	0.32	0.18	0.01	0	1.38	1.11	1.8	1.52	0.77	0.66	0.46	0.37	0.26	0.19	0.01	0.01	1.84	1.1	2.03	1.44	0.96	0.67	0.82	0.36	0.38	0.18	0	0
DeepPruner_Fast	hacienda4	0.73	0.64	1.03	0.95	0.46	0.39	0.22	0.21	0.09	0.05	0	0	0.8	0.71	1.15	1.06	0.52	0.43	0.25	0.23	0.1	0.07	0	0	0.65	0.57	0.89	0.8	0.4	0.34	0.2	0.19	0.08	0.03	0	0
DeepPruner_Fast	hacienda8	9.33	11.64	24	28.65	0.88	0.68	0.43	0.37	0.18	0.2	0.16	0.18	5.21	5.8	17.62	18.73	0.84	0.86	0.47	0.53	0.12	0.17	0.08	0.11	10.87	13.82	25.99	31.57	0.89	0.61	0.42	0.31	0.2	0.21	0.19	0.21
DeepPruner_Fast	landscape1_5	1.3	1.14	4.19	3.72	0.5	0.46	0.23	0.19	0.09	0.07	0.04	0.04	2.34	2.08	6.4	5.73	0.6	0.58	0.36	0.33	0.18	0.16	0.09	0.09	0.63	0.53	1.54	1.22	0.44	0.38	0.14	0.1	0.03	0.02	0	0
DeepPruner_Fast	landscape1_6	1.02	0.89	2.73	2.46	0.42	0.35	0.19	0.16	0.08	0.08	0.05	0.04	1.75	1.55	4.01	3.62	0.57	0.52	0.34	0.31	0.17	0.16	0.1	0.09	0.42	0.34	0.58	0.46	0.3	0.22	0.06	0.03	0.01	0	0	0
DeepPruner_Fast	landscape3_2	2.91	3.52	6.96	8.24	0.49	0.51	0.31	0.32	0.25	0.25	0.21	0.21	3.44	3.62	9.14	9.32	0.61	0.62	0.36	0.38	0.23	0.24	0.16	0.17	2.53	3.45	4.82	7.37	0.41	0.43	0.28	0.28	0.26	0.26	0.25	0.25
DeepPruner_Fast	landscape5_2	28.61	0.93	43.64	1.06	0.94	0.83	0.8	0.36	0.58	0.03	0.48	0	17.44	1.09	35.37	1.34	0.87	0.73	0.68	0.47	0.41	0.14	0.25	0	30.93	0.9	45.16	0.99	0.96	0.85	0.83	0.33	0.61	0.01	0.53	0
DeepPruner_Fast	living_room_1_1	1.11	0.65	1.49	1.02	0.69	0.39	0.39	0.19	0.17	0.06	0.02	0.01	1.31	0.92	1.77	1.34	0.68	0.58	0.48	0.32	0.25	0.11	0.03	0.02	0.89	0.34	1.11	0.45	0.7	0.18	0.3	0.04	0.08	0	0	0
DeepPruner_Fast	living_room_2_3	0.85	0.36	1.04	0.46	0.66	0.2	0.29	0.03	0.06	0	0	0	1.18	0.55	1.45	0.72	0.71	0.42	0.48	0.14	0.2	0.02	0	0	0.77	0.31	0.92	0.37	0.65	0.15	0.25	0.01	0.03	0	0	0
DeepPruner_Best_norefine	abstract_bowls_1	1.64	0.71	2.87	2.08	0.67	0.23	0.43	0.11	0.24	0.06	0.1	0.04	1.89	1.28	3.55	3.02	0.62	0.41	0.4	0.21	0.24	0.13	0.14	0.09	1.42	0.22	2.1	0.37	0.7	0.08	0.46	0.02	0.24	0	0.06	0
DeepPruner_Best_norefine	abstract_bowls_14	4.54	0.51	8.04	1.47	0.71	0.18	0.55	0.09	0.41	0.04	0.31	0.02	3.44	0.99	7.21	2.34	0.65	0.35	0.46	0.19	0.29	0.11	0.19	0.05	5.21	0.22	8.5	0.36	0.74	0.08	0.6	0.02	0.48	0	0.38	0
DeepPruner_Best_norefine	bones_3	4.23	3.17	9.91	8.64	0.52	0.36	0.36	0.24	0.25	0.17	0.17	0.13	4.74	4.52	10.55	10.42	0.58	0.51	0.4	0.34	0.27	0.25	0.2	0.19	3.12	0.22	8.32	0.84	0.39	0.06	0.26	0.01	0.19	0	0.12	0
DeepPruner_Best_norefine	bones_6	3.59	3.74	9.2	9.52	0.54	0.47	0.35	0.31	0.22	0.21	0.15	0.15	4.4	4.66	10.34	10.7	0.6	0.57	0.41	0.39	0.26	0.26	0.18	0.19	0.53	0.31	0.97	1.32	0.32	0.09	0.14	0.01	0.03	0	0.01	0
DeepPruner_Best_norefine	Chairs4	2.57	1.52	4	3.09	0.66	0.39	0.5	0.28	0.38	0.22	0.27	0.14	2.89	1.93	4.28	3.53	0.73	0.5	0.57	0.37	0.44	0.29	0.31	0.18	1.56	0.23	2.97	0.75	0.46	0.03	0.27	0.01	0.19	0	0.15	0
DeepPruner_Best_norefine	chess_8	1.65	0.46	3.25	1.27	0.39	0.16	0.26	0.07	0.22	0.04	0.16	0.02	1.78	0.79	3.3	1.8	0.49	0.3	0.32	0.15	0.24	0.09	0.16	0.05	1.53	0.14	3.2	0.19	0.29	0.02	0.21	0	0.2	0	0.16	0
DeepPruner_Best_norefine	childroom_1	0.49	0.29	0.94	0.82	0.3	0.09	0.09	0.04	0.03	0.02	0.01	0.01	0.69	0.5	1.36	1.25	0.38	0.2	0.15	0.09	0.06	0.04	0.03	0.02	0.35	0.14	0.46	0.18	0.24	0.02	0.05	0	0	0	0	0
DeepPruner_Best_norefine	childroom_12	2.05	0.7	4.94	2.72	0.45	0.13	0.28	0.07	0.17	0.05	0.11	0.04	2.08	1.26	5	3.84	0.42	0.24	0.26	0.13	0.17	0.09	0.12	0.07	2.02	0.14	4.87	0.25	0.48	0.02	0.31	0	0.17	0	0.1	0
DeepPruner_Best_norefine	childroom_2	1.89	1.06	5.79	4.3	0.55	0.25	0.37	0.14	0.19	0.08	0.07	0.05	2.89	1.96	8.1	6.17	0.63	0.44	0.46	0.27	0.25	0.16	0.13	0.09	0.96	0.23	1.96	0.66	0.47	0.06	0.29	0.03	0.13	0.01	0.02	0
DeepPruner_Best_norefine	childroom_4	0.42	0.27	0.84	0.68	0.25	0.12	0.09	0.03	0.02	0.01	0	0	0.57	0.42	1.12	0.94	0.37	0.24	0.14	0.06	0.03	0.02	0.01	0.01	0.27	0.12	0.4	0.15	0.14	0	0.04	0	0	0	0	0
DeepPruner_Best_norefine	childroom_6	0.59	0.4	1.53	1.33	0.24	0.12	0.1	0.05	0.05	0.03	0.03	0.02	0.87	0.68	2.08	1.9	0.35	0.22	0.16	0.09	0.08	0.06	0.05	0.04	0.35	0.17	0.79	0.42	0.15	0.04	0.04	0.01	0.02	0	0.01	0
DeepPruner_Best_norefine	childroom_9	0.51	0.42	1.58	1.48	0.18	0.13	0.07	0.06	0.04	0.03	0.02	0.02	1.04	0.9	2.6	2.44	0.38	0.3	0.19	0.15	0.1	0.08	0.06	0.05	0.21	0.15	0.27	0.21	0.07	0.03	0	0.01	0	0	0	0
DeepPruner_Best_norefine	cloth4	1.63	0.3	5.51	0.41	0.48	0.13	0.28	0.02	0.12	0	0.04	0	2.5	0.49	7.55	0.67	0.63	0.33	0.49	0.11	0.22	0.02	0.07	0	1.4	0.25	4.83	0.3	0.44	0.07	0.23	0	0.1	0	0.04	0
DeepPruner_Best_norefine	cloth6	1.54	0.34	3.12	0.74	0.57	0.15	0.33	0.04	0.22	0.02	0.08	0.01	1.91	0.64	3.86	1.25	0.64	0.35	0.41	0.13	0.27	0.06	0.11	0.02	1.36	0.19	2.7	0.25	0.53	0.05	0.29	0	0.19	0	0.07	0
DeepPruner_Best_norefine	cloth7	7.23	0.63	16.56	2.03	0.61	0.22	0.45	0.09	0.36	0.04	0.33	0.03	4.47	1.15	13.05	2.96	0.56	0.38	0.35	0.18	0.23	0.09	0.2	0.06	9.57	0.2	19.02	0.48	0.65	0.08	0.54	0.01	0.47	0	0.44	0
DeepPruner_Best_norefine	coral6	1.63	0.52	3.03	1.6	0.53	0.14	0.35	0.08	0.22	0.05	0.13	0.03	2.55	1.14	4.05	2.57	0.68	0.33	0.53	0.2	0.36	0.14	0.23	0.09	1.05	0.14	2.15	0.2	0.43	0.02	0.24	0	0.13	0	0.06	0
DeepPruner_Best_norefine	dining_room_1_1	4.2	4.44	10.37	10.96	0.58	0.52	0.39	0.36	0.24	0.23	0.17	0.18	6.13	6.67	13	13.79	0.67	0.63	0.49	0.47	0.34	0.34	0.25	0.27	1.45	1.25	4.46	4.5	0.47	0.36	0.25	0.2	0.1	0.07	0.06	0.04
DeepPruner_Best_norefine	office_top5	0.65	0.34	1.13	0.83	0.37	0.12	0.17	0.05	0.07	0.03	0.02	0.01	0.92	0.68	1.62	1.38	0.42	0.31	0.24	0.13	0.14	0.08	0.05	0.04	0.5	0.16	0.74	0.21	0.35	0.02	0.13	0	0.02	0	0	0
DeepPruner_Best_norefine	park1	0.44	0.44	0.8	0.79	0.21	0.21	0.09	0.09	0.03	0.03	0.01	0.01	0.62	0.62	1.08	1.06	0.35	0.35	0.17	0.17	0.06	0.06	0.01	0.01	0.24	0.25	0.3	0.29	0.06	0.07	0.01	0	0	0	0	0
DeepPruner_Best_norefine	park10	1.12	1.08	2.72	2.75	0.36	0.32	0.21	0.19	0.13	0.12	0.07	0.07	1.63	1.61	3.37	3.43	0.52	0.49	0.31	0.3	0.2	0.19	0.11	0.11	0.19	0.12	0.3	0.16	0.07	0	0.01	0	0	0	0	0
DeepPruner_Best_norefine	park6	1.39	1.13	4.45	4.11	0.39	0.2	0.21	0.12	0.09	0.08	0.06	0.06	3.35	3.01	7.61	7.08	0.62	0.5	0.43	0.34	0.26	0.24	0.17	0.17	0.4	0.18	0.65	0.24	0.27	0.05	0.1	0	0	0	0	0
DeepPruner_Best_norefine	person1_1	17.69	1.22	31.8	5.05	0.6	0.09	0.48	0.06	0.45	0.05	0.43	0.05	12.7	3.76	24.8	9.04	0.61	0.32	0.42	0.21	0.37	0.18	0.36	0.17	19.27	0.42	33.72	2.78	0.6	0.02	0.5	0.01	0.47	0.01	0.46	0.01
DeepPruner_Best_norefine	person1_3	1.88	1.39	6.4	6.03	0.41	0.28	0.27	0.12	0.12	0.07	0.08	0.05	4.25	3.35	10.64	10.09	0.59	0.46	0.44	0.28	0.28	0.19	0.19	0.14	0.62	0.33	1.52	1.18	0.32	0.19	0.18	0.03	0.04	0.01	0.01	0
DeepPruner_Best_norefine	person1_8	11.04	0.6	23.63	2.3	0.48	0.11	0.38	0.06	0.35	0.05	0.33	0.04	11.8	2.1	26.36	4.89	0.54	0.29	0.39	0.21	0.34	0.18	0.33	0.15	10.85	0.24	22.92	0.86	0.46	0.06	0.38	0.03	0.35	0.01	0.32	0.01
DeepPruner_Best_norefine	person2_5	1.57	0.26	4.65	0.68	0.57	0.08	0.35	0.03	0.15	0.02	0.08	0.01	1.79	0.5	5.74	1.12	0.53	0.23	0.33	0.09	0.17	0.05	0.08	0.02	1.45	0.13	3.91	0.16	0.59	0	0.36	0	0.14	0	0.07	0
DeepPruner_Best_norefine	person3_10	1.61	0.34	4.94	1.13	0.48	0.1	0.35	0.06	0.2	0.03	0.07	0.01	2.53	0.81	6.92	2.12	0.62	0.3	0.45	0.17	0.27	0.09	0.13	0.04	1.28	0.17	3.98	0.32	0.43	0.03	0.31	0.02	0.18	0.01	0.05	0
DeepPruner_Best_norefine	person3_3	1.7	0.47	3.64	1.83	0.5	0.14	0.3	0.05	0.17	0.03	0.12	0.02	2.57	1.31	5.11	3.61	0.65	0.35	0.42	0.18	0.22	0.1	0.16	0.07	1.41	0.18	2.98	0.27	0.45	0.07	0.26	0.01	0.15	0	0.11	0
DeepPruner_Best_norefine	person3_4	2.42	0.88	6.98	3.49	0.38	0.16	0.19	0.08	0.11	0.05	0.09	0.04	3.8	2.11	8.88	5.77	0.52	0.33	0.29	0.2	0.19	0.13	0.16	0.11	1.63	0.19	5.61	0.41	0.3	0.07	0.13	0.01	0.07	0	0.06	0
DeepPruner_Best_norefine	plant_vintage12	2.61	1.39	5.03	3.69	0.55	0.31	0.37	0.19	0.28	0.14	0.2	0.1	2.64	2.07	5.19	4.6	0.57	0.46	0.37	0.3	0.27	0.21	0.2	0.15	2.57	0.19	4.74	0.49	0.52	0.04	0.38	0.01	0.29	0.01	0.21	0
DeepPruner_Best_norefine	plant_vintage14	0.75	0.28	2.44	0.49	0.34	0.1	0.19	0.04	0.1	0.01	0.01	0	1.08	0.51	3.51	0.84	0.46	0.29	0.29	0.13	0.13	0.05	0.02	0	0.61	0.18	1.83	0.22	0.29	0.02	0.15	0	0.08	0	0	0
DeepPruner_Best_norefine	plant_vintage15	0.51	0.25	0.85	0.5	0.26	0.09	0.15	0.04	0.05	0.02	0	0	0.77	0.51	1.18	0.87	0.43	0.28	0.28	0.13	0.11	0.05	0.01	0.01	0.39	0.13	0.64	0.16	0.19	0	0.1	0	0.03	0	0	0
DeepPruner_Best_norefine	plant_vintage2	0.63	0.46	1.06	0.59	0.44	0.37	0.17	0.07	0.03	0	0.01	0	0.74	0.52	1.33	0.71	0.47	0.42	0.25	0.13	0.04	0.01	0.01	0	0.56	0.43	0.88	0.51	0.43	0.34	0.12	0.03	0.02	0	0.01	0
DeepPruner_Best_norefine	plant_vintage4	0.93	0.37	3.65	0.7	0.32	0.19	0.17	0.06	0.08	0.02	0.02	0.01	1.21	0.62	4.26	1.08	0.43	0.36	0.27	0.16	0.13	0.07	0.04	0.02	0.76	0.23	3.23	0.29	0.25	0.1	0.1	0	0.06	0	0.02	0
DeepPruner_Best_norefine	plant_vintage7	1.06	1.07	2.61	2.78	0.32	0.27	0.16	0.14	0.11	0.1	0.08	0.08	1.69	1.76	3.5	3.76	0.48	0.45	0.27	0.26	0.18	0.18	0.14	0.14	0.31	0.24	0.55	0.29	0.13	0.06	0.04	0	0.02	0	0	0
DeepPruner_Best_norefine	roundntwist4	1.84	1.06	2.28	1.39	0.78	0.71	0.65	0.39	0.44	0.13	0.06	0.01	1.48	1.12	2.01	1.56	0.65	0.6	0.48	0.4	0.33	0.2	0.05	0.02	2.38	0.97	2.63	1.09	0.98	0.86	0.91	0.38	0.61	0.04	0.07	0
DeepPruner_Best_norefine	ScifiKnot1	1.4	0.5	2.52	1.29	0.47	0.17	0.3	0.09	0.2	0.06	0.13	0.03	1.91	1	3.15	2.03	0.57	0.35	0.38	0.21	0.29	0.14	0.19	0.08	1.09	0.2	2.04	0.4	0.41	0.06	0.24	0.02	0.14	0.01	0.1	0
DeepPruner_Best_norefine	ScifiKnot4	3.34	0.74	7.25	2.59	0.7	0.2	0.54	0.11	0.38	0.06	0.17	0.03	4.8	2.19	9.51	5.07	0.79	0.5	0.64	0.34	0.44	0.22	0.25	0.13	2.84	0.25	6.3	0.43	0.67	0.1	0.51	0.04	0.36	0.01	0.14	0
DeepPruner_Best_norefine	sleeping_room_1_11	0.6	0.24	0.9	0.56	0.44	0.09	0.19	0.04	0.02	0.01	0	0	0.75	0.5	1.22	1.02	0.48	0.26	0.24	0.12	0.05	0.03	0.01	0.01	0.55	0.15	0.74	0.22	0.42	0.03	0.17	0.01	0.01	0	0	0
DeepPruner_Best_norefine	living_room_3_5	1.61	0.94	3.56	2.3	0.42	0.32	0.27	0.19	0.17	0.11	0.11	0.05	2.04	1.48	4.11	3.14	0.51	0.47	0.34	0.29	0.22	0.17	0.15	0.1	1.22	0.46	2.97	1.13	0.33	0.18	0.2	0.11	0.12	0.06	0.08	0.01
DeepPruner_Best_norefine	living_room_3_9	0.51	0.31	0.82	0.5	0.32	0.18	0.12	0.03	0.03	0	0	0	0.63	0.45	1.01	0.75	0.42	0.32	0.18	0.08	0.04	0.01	0.01	0	0.45	0.23	0.7	0.31	0.27	0.11	0.09	0.01	0.03	0	0	0
DeepPruner_Best_norefine	mannequins_10	4.88	4.22	11.78	11.65	0.6	0.39	0.44	0.27	0.33	0.2	0.23	0.15	6.4	6.34	14.19	14.49	0.69	0.55	0.51	0.4	0.39	0.3	0.28	0.23	2.24	0.51	5.44	2.49	0.46	0.1	0.32	0.04	0.23	0.02	0.15	0.02
DeepPruner_Best_norefine	mannequins_12	5.24	1.44	8.9	4.57	0.64	0.2	0.53	0.13	0.45	0.1	0.4	0.09	5.48	2.7	9.8	6.34	0.57	0.38	0.45	0.25	0.38	0.2	0.35	0.17	5.01	0.21	7.93	1.44	0.71	0.02	0.61	0.01	0.52	0.01	0.45	0
DeepPruner_Best_norefine	mannequins_2	3.88	1.61	6.95	4.71	0.62	0.28	0.53	0.19	0.43	0.14	0.29	0.1	3.62	2.35	7.07	5.74	0.57	0.41	0.46	0.28	0.36	0.2	0.24	0.14	4.39	0.17	6.69	1.04	0.71	0.01	0.65	0	0.55	0	0.4	0
DeepPruner_Best_norefine	mannequins_5	1.03	0.6	1.93	1.49	0.45	0.23	0.27	0.11	0.13	0.06	0.06	0.04	1.26	0.89	2.31	1.93	0.5	0.36	0.32	0.18	0.16	0.1	0.1	0.06	0.68	0.16	1.18	0.22	0.37	0.04	0.19	0	0.08	0	0.01	0
DeepPruner_Best_norefine	mannequins_9	2.06	1.29	4.16	3.69	0.49	0.3	0.35	0.18	0.28	0.11	0.16	0.07	2.26	1.77	4.58	4.36	0.54	0.42	0.38	0.25	0.29	0.16	0.14	0.1	1.62	0.23	3.02	1.27	0.39	0.03	0.28	0.01	0.26	0.01	0.19	0
DeepPruner_Best_norefine	Minicubes4	3.68	2.57	6.35	5.4	0.61	0.39	0.42	0.29	0.34	0.24	0.3	0.19	3.45	2.94	6.2	5.81	0.59	0.47	0.42	0.33	0.34	0.28	0.27	0.22	4.1	1.89	6.63	4.56	0.64	0.24	0.41	0.2	0.35	0.17	0.34	0.14
DeepPruner_Best_norefine	Minicubes5	3.54	1.44	6.18	3.19	0.66	0.39	0.47	0.25	0.36	0.16	0.31	0.11	2.98	1.76	5.63	3.67	0.64	0.44	0.45	0.3	0.32	0.21	0.25	0.14	4.35	0.97	6.9	2.34	0.68	0.32	0.5	0.18	0.42	0.1	0.41	0.07
DeepPruner_Best_norefine	Minicubes9	4.21	0.73	8.93	1.89	0.77	0.23	0.64	0.13	0.52	0.08	0.39	0.05	3.46	1.18	8.77	2.52	0.7	0.4	0.54	0.23	0.4	0.15	0.26	0.09	5.17	0.16	9.13	0.21	0.85	0.03	0.76	0	0.68	0	0.56	0
DeepPruner_Best_norefine	moto3	0.81	0.66	1.46	1.14	0.38	0.37	0.19	0.15	0.11	0.07	0.05	0.02	1.18	0.94	1.92	1.55	0.52	0.47	0.31	0.27	0.2	0.14	0.08	0.04	0.52	0.43	0.96	0.62	0.27	0.29	0.09	0.06	0.05	0.02	0.02	0
DeepPruner_Best_norefine	music1_1	2.2	0.52	5.82	1.22	0.39	0.22	0.25	0.12	0.17	0.05	0.11	0.02	3	1.02	7.39	2	0.52	0.43	0.38	0.25	0.25	0.12	0.14	0.06	1.79	0.27	4.84	0.47	0.32	0.11	0.18	0.05	0.13	0.01	0.1	0
DeepPruner_Best_norefine	music1_6	2.38	1.58	5	4.58	0.54	0.31	0.39	0.21	0.27	0.13	0.18	0.09	3.21	2.52	6.22	5.93	0.62	0.49	0.47	0.33	0.35	0.22	0.24	0.16	1.15	0.19	2.18	0.37	0.41	0.06	0.28	0.02	0.16	0.01	0.09	0
DeepPruner_Best_norefine	music1_7	0.64	0.35	1.23	0.87	0.29	0.11	0.14	0.06	0.08	0.04	0.03	0.02	1.16	0.81	1.95	1.56	0.49	0.33	0.3	0.18	0.19	0.12	0.09	0.06	0.42	0.15	0.73	0.18	0.2	0.01	0.07	0	0.04	0	0	0
DeepPruner_Best_norefine	music1_9	6.91	0.53	13.54	1.48	0.64	0.17	0.56	0.09	0.48	0.04	0.37	0.03	7.05	1.17	15.19	2.61	0.59	0.41	0.48	0.24	0.36	0.13	0.27	0.07	6.88	0.36	13.04	0.94	0.65	0.11	0.59	0.05	0.52	0.02	0.4	0.01
DeepPruner_Best_norefine	nest5	5.21	3.44	19.47	18.81	0.73	0.41	0.5	0.3	0.34	0.21	0.26	0.14	6.56	5.49	24.47	24.14	0.76	0.61	0.57	0.46	0.41	0.34	0.31	0.24	3.61	1	10.81	8.99	0.69	0.17	0.41	0.11	0.25	0.06	0.21	0.02
DeepPruner_Best_norefine	office1	1.85	0.32	6.14	0.46	0.52	0.14	0.3	0.04	0.17	0.01	0.05	0	1.45	0.46	5.33	0.66	0.49	0.31	0.29	0.1	0.14	0.02	0.02	0	2.08	0.25	6.55	0.28	0.53	0.05	0.3	0	0.18	0	0.07	0
DeepPruner_Best_norefine	office12	3.55	0.92	6.22	3.16	0.7	0.16	0.57	0.1	0.38	0.07	0.24	0.06	5.56	2.13	8.49	5.18	0.78	0.36	0.67	0.23	0.54	0.18	0.39	0.14	2.48	0.28	4.59	1.05	0.66	0.06	0.52	0.03	0.3	0.02	0.16	0.01
DeepPruner_Best_norefine	office14	2.43	0.94	6.21	3.51	0.46	0.22	0.29	0.13	0.18	0.08	0.12	0.05	3.03	1.98	7.01	5.41	0.62	0.42	0.4	0.27	0.25	0.18	0.17	0.11	2.01	0.21	5.57	0.57	0.35	0.08	0.22	0.04	0.14	0.01	0.09	0
DeepPruner_Best_norefine	office2	2.11	0.38	6.69	0.48	0.61	0.23	0.26	0.04	0.13	0	0.08	0	1.56	0.49	5.8	0.64	0.54	0.4	0.31	0.11	0.1	0.01	0.03	0	2.31	0.34	6.99	0.4	0.63	0.18	0.25	0.01	0.15	0	0.1	0
DeepPruner_Best_norefine	sleeping_room_1_15	0.9	0.3	1.29	0.53	0.52	0.15	0.38	0.05	0.13	0.01	0	0	0.98	0.48	1.38	0.76	0.56	0.3	0.38	0.12	0.16	0.03	0	0	0.83	0.17	1.21	0.23	0.49	0.03	0.38	0.01	0.11	0	0	0
DeepPruner_Best_norefine	sleeping_room_1_3	0.53	0.63	0.8	2.15	0.41	0.28	0.09	0.09	0.02	0.02	0	0.02	0.69	0.91	1.17	2.86	0.49	0.39	0.18	0.17	0.04	0.05	0.01	0.03	0.48	0.53	0.64	1.86	0.39	0.24	0.06	0.06	0.01	0.02	0	0.01
DeepPruner_Best_norefine	sleeping_room_1_7	0.67	0.36	1.16	0.8	0.4	0.15	0.18	0.04	0.06	0.02	0.02	0.01	0.98	0.67	1.63	1.37	0.54	0.32	0.28	0.13	0.11	0.07	0.05	0.03	0.53	0.22	0.86	0.28	0.34	0.08	0.13	0	0.04	0	0.01	0
DeepPruner_Best_norefine	spaceStation2	10.38	11	14.13	15.41	0.77	0.76	0.71	0.7	0.69	0.69	0.69	0.68	4.6	4.6	8.22	8.32	0.56	0.53	0.41	0.4	0.36	0.35	0.34	0.34	13.32	14.25	16.33	17.97	0.88	0.87	0.86	0.86	0.86	0.86	0.86	0.86
DeepPruner_Best_norefine	stack_circles4	14.5	0.76	22.94	2.86	0.75	0.14	0.64	0.07	0.58	0.05	0.55	0.04	8.92	1.73	18.23	4.61	0.7	0.35	0.54	0.19	0.42	0.14	0.36	0.11	17.61	0.21	25.19	0.92	0.77	0.03	0.69	0.01	0.67	0.01	0.66	0
DeepPruner_Best_norefine	stack_circles9	10.36	1	19.13	3.2	0.74	0.17	0.65	0.11	0.58	0.08	0.54	0.06	6.55	1.99	14.38	4.68	0.62	0.37	0.47	0.24	0.38	0.18	0.35	0.14	12.76	0.38	21.59	1.7	0.82	0.05	0.75	0.03	0.7	0.02	0.65	0.02
DeepPruner_Best_norefine	time_travellers_10	34.4	3.1	45.7	11.18	0.76	0.22	0.65	0.15	0.59	0.11	0.58	0.09	26.14	8.59	39.11	19.12	0.75	0.49	0.61	0.36	0.51	0.29	0.46	0.24	37.77	0.86	48.13	5.19	0.76	0.1	0.67	0.06	0.63	0.03	0.63	0.02
DeepPruner_Best_norefine	time_travellers_13	10	0.92	13.66	3.19	0.77	0.15	0.69	0.09	0.65	0.07	0.62	0.06	7.33	2.06	11.96	4.98	0.67	0.35	0.54	0.22	0.48	0.17	0.45	0.14	11.83	0.14	14.71	0.29	0.84	0.01	0.79	0	0.77	0	0.74	0
DeepPruner_Best_norefine	time_travellers_15	14.94	2.59	22.13	7.95	0.68	0.19	0.6	0.15	0.57	0.12	0.56	0.1	11.7	5.54	20.54	11.67	0.65	0.45	0.51	0.33	0.43	0.27	0.4	0.23	16.81	0.89	23.01	4.59	0.7	0.05	0.66	0.04	0.65	0.03	0.65	0.03
DeepPruner_Best_norefine	time_travellers_2	6.94	1.2	10.4	4.26	0.65	0.18	0.56	0.11	0.52	0.08	0.5	0.07	5.72	2.6	9.89	6.52	0.6	0.39	0.45	0.25	0.39	0.19	0.35	0.16	7.82	0.18	10.75	0.74	0.68	0.03	0.63	0.01	0.62	0.01	0.6	0
DeepPruner_Best_norefine	time_travellers_20	6.5	0.41	8.92	1.4	0.83	0.1	0.77	0.05	0.72	0.04	0.61	0.03	5.24	0.98	8.71	2.39	0.7	0.29	0.58	0.16	0.52	0.11	0.46	0.08	7.15	0.12	9.03	0.15	0.9	0	0.86	0	0.82	0	0.69	0
DeepPruner_Best_norefine	time_travellers_24	41.64	2.15	51.73	8.7	0.86	0.19	0.78	0.13	0.71	0.1	0.68	0.08	30.66	6.61	44.72	16.52	0.81	0.46	0.68	0.31	0.55	0.24	0.49	0.2	45.37	0.64	53.9	2.95	0.88	0.1	0.81	0.07	0.76	0.06	0.74	0.03
DeepPruner_Best_norefine	time_travellers_25	10.82	2.11	16.67	7.11	0.66	0.2	0.56	0.13	0.52	0.11	0.51	0.09	10.87	4.51	18.06	10.8	0.69	0.41	0.53	0.28	0.46	0.23	0.44	0.2	10.78	0.52	15.68	2.6	0.65	0.06	0.58	0.04	0.56	0.03	0.56	0.02
DeepPruner_Best_norefine	time_travellers_3	12.65	1.56	17.92	5.55	0.72	0.2	0.64	0.13	0.61	0.1	0.59	0.08	9.89	3.37	16.19	8.45	0.68	0.42	0.56	0.29	0.49	0.22	0.45	0.17	14.7	0.22	19.1	0.79	0.75	0.04	0.7	0.02	0.69	0.01	0.69	0.01
DeepPruner_Best_norefine	twirls2	1.28	0.45	2.15	0.84	0.46	0.24	0.32	0.08	0.25	0.03	0.09	0.01	1.57	0.72	2.47	1.27	0.57	0.4	0.41	0.2	0.31	0.07	0.1	0.02	1.09	0.28	1.92	0.36	0.4	0.15	0.26	0.01	0.21	0	0.08	0
DeepPruner_Best_norefine	twirls3	1.19	0.41	2.1	0.75	0.43	0.24	0.32	0.07	0.23	0.02	0.07	0.01	1.5	0.68	2.59	1.2	0.52	0.39	0.37	0.18	0.27	0.07	0.11	0.03	1.03	0.27	1.8	0.37	0.39	0.17	0.3	0.01	0.21	0	0.04	0
DeepPruner_Best_norefine	voronoid_sphere6	4.96	3.41	10.41	8.82	0.71	0.3	0.46	0.22	0.25	0.17	0.2	0.15	6.25	5.12	11.89	10.88	0.78	0.44	0.54	0.33	0.33	0.26	0.26	0.23	2.8	0.53	7.28	3.06	0.6	0.07	0.33	0.04	0.13	0.02	0.1	0.01
DeepPruner_Best_norefine	voronoid_sphere9	4.37	2.5	7.05	5.27	0.56	0.36	0.45	0.27	0.41	0.23	0.36	0.2	3.43	2.87	6.06	5.7	0.5	0.38	0.38	0.31	0.34	0.27	0.29	0.23	9.82	0.41	11.2	0.9	0.88	0.28	0.84	0.04	0.81	0.01	0.78	0.01
DeepPruner_Best_norefine	walker4	6.04	1.38	7.94	3.21	0.8	0.32	0.72	0.2	0.66	0.14	0.59	0.11	5.4	2.67	8.06	4.9	0.65	0.44	0.54	0.33	0.5	0.28	0.48	0.24	6.44	0.58	7.87	1.34	0.9	0.25	0.83	0.12	0.76	0.05	0.65	0.02
DeepPruner_Best_norefine	windmills4	0.67	0.49	1.28	0.81	0.32	0.31	0.14	0.07	0.08	0.03	0.04	0.01	1.36	0.87	2.22	1.46	0.54	0.46	0.33	0.22	0.21	0.11	0.14	0.05	0.48	0.39	0.85	0.49	0.25	0.27	0.09	0.02	0.05	0	0.01	0
DeepPruner_Best_norefine	youngster_room10	2.2	0.5	7.62	1.4	0.5	0.22	0.27	0.09	0.15	0.03	0.08	0.02	2.58	1.09	8.39	2.42	0.65	0.52	0.37	0.25	0.2	0.1	0.1	0.05	2.02	0.21	7.22	0.3	0.43	0.07	0.22	0.01	0.12	0	0.07	0
DeepPruner_Best_norefine	youngster_room14	2.59	0.8	4.24	1.95	0.64	0.32	0.51	0.15	0.35	0.08	0.23	0.04	2.09	1.36	3.73	2.9	0.62	0.49	0.44	0.27	0.26	0.14	0.17	0.08	2.85	0.5	4.49	1.15	0.66	0.23	0.55	0.09	0.4	0.04	0.26	0.02
DeepPruner_Best_norefine	youngster_room4	0.48	0.29	0.86	0.69	0.29	0.11	0.12	0.03	0.03	0.01	0.01	0.01	0.76	0.55	1.32	1.16	0.44	0.28	0.24	0.1	0.07	0.04	0.02	0.02	0.34	0.15	0.49	0.2	0.21	0.03	0.06	0	0	0	0	0
DeepPruner_Best_norefine	youngster_room7	0.77	0.48	1.69	1.27	0.37	0.17	0.17	0.08	0.07	0.04	0.04	0.02	1.16	0.88	2.35	1.93	0.46	0.36	0.3	0.17	0.13	0.1	0.07	0.05	0.58	0.28	1.23	0.74	0.32	0.08	0.11	0.03	0.04	0.01	0.02	0.01
DeepPruner_Best_norefine	youngster_room9	0.47	0.28	0.94	0.8	0.27	0.11	0.09	0.03	0.02	0.01	0.01	0.01	0.74	0.61	1.55	1.43	0.38	0.31	0.19	0.1	0.07	0.04	0.02	0.02	0.35	0.14	0.48	0.19	0.22	0.02	0.05	0	0.01	0	0	0
DeepPruner_Best_norefine	dining_room_1_13	1.12	0.36	1.95	0.96	0.44	0.15	0.32	0.08	0.21	0.03	0.06	0.01	1.17	0.68	2.11	1.53	0.49	0.35	0.33	0.18	0.22	0.06	0.05	0.02	1.1	0.16	1.85	0.29	0.41	0.02	0.31	0.01	0.21	0	0.07	0
DeepPruner_Best_norefine	living_room_3_2	0.96	0.42	1.45	0.87	0.58	0.19	0.28	0.05	0.13	0.02	0.03	0.01	1.41	0.8	2.22	1.71	0.63	0.3	0.36	0.17	0.22	0.1	0.11	0.06	0.83	0.31	1.14	0.38	0.56	0.16	0.25	0.01	0.1	0	0	0
DeepPruner_Best_norefine	office_top4	1.71	0.42	7.26	0.56	0.35	0.31	0.17	0.07	0.08	0	0.05	0	2.17	0.51	9.01	0.72	0.44	0.38	0.27	0.17	0.07	0.01	0.05	0	1.51	0.38	6.31	0.46	0.31	0.28	0.13	0.03	0.08	0	0.05	0
DeepPruner_Best_norefine	sleeping_room_1_13	5.2	0.3	17.01	0.71	0.51	0.1	0.35	0.03	0.2	0.01	0.14	0.01	4.39	0.62	15.67	1.35	0.58	0.3	0.35	0.12	0.19	0.05	0.12	0.03	5.48	0.19	17.45	0.25	0.49	0.03	0.35	0	0.21	0	0.14	0
DeepPruner_Best_norefine	dining_room_1_5	1.18	0.99	2.58	2.37	0.5	0.43	0.27	0.2	0.13	0.09	0.06	0.05	1.76	1.52	3.53	3.32	0.59	0.5	0.38	0.3	0.21	0.17	0.11	0.1	0.63	0.47	1.03	0.65	0.41	0.37	0.16	0.1	0.05	0.01	0.02	0
DeepPruner_Best_norefine	dining_room_1_7	5.11	2.78	10.03	7.24	0.66	0.33	0.47	0.23	0.33	0.17	0.25	0.14	5.86	4.33	10.87	9.2	0.7	0.55	0.54	0.39	0.4	0.27	0.29	0.21	4.24	0.99	8.96	3.89	0.61	0.08	0.39	0.06	0.26	0.05	0.2	0.05
DeepPruner_Best_norefine	dining_room_1_9	0.69	0.6	1.46	1.45	0.38	0.31	0.17	0.12	0.06	0.05	0.02	0.02	1	0.92	1.96	1.98	0.5	0.45	0.28	0.22	0.11	0.09	0.04	0.04	0.36	0.25	0.49	0.37	0.26	0.15	0.05	0.02	0	0	0	0
DeepPruner_Best_norefine	floating_cubes1	3.42	0.8	4.64	1.84	0.61	0.28	0.58	0.16	0.56	0.09	0.46	0.06	3.44	1.41	4.77	2.7	0.59	0.4	0.54	0.29	0.52	0.2	0.45	0.13	3.4	0.34	4.53	0.63	0.62	0.18	0.6	0.06	0.58	0.01	0.46	0
DeepPruner_Best_norefine	fruit1	1.22	0.64	2.03	1.1	0.47	0.35	0.31	0.16	0.2	0.07	0.1	0.02	1.31	0.85	1.96	1.35	0.61	0.52	0.42	0.26	0.23	0.09	0.07	0.03	1.18	0.52	2.07	0.94	0.4	0.25	0.25	0.1	0.19	0.06	0.11	0.01
DeepPruner_Best_norefine	fruit6	1.06	0.47	2.34	1.55	0.27	0.13	0.2	0.06	0.15	0.04	0.12	0.03	1.91	1.24	3.39	2.87	0.52	0.4	0.36	0.22	0.26	0.13	0.21	0.09	0.71	0.15	1.74	0.21	0.16	0.02	0.13	0	0.11	0	0.09	0
DeepPruner_Best_norefine	fruit8	0.9	0.26	2.71	0.62	0.37	0.1	0.27	0.04	0.1	0.02	0.03	0.01	1.41	0.55	4.02	1.07	0.49	0.29	0.35	0.13	0.19	0.05	0.05	0.02	0.67	0.13	1.81	0.18	0.32	0.01	0.23	0	0.06	0	0.02	0
DeepPruner_Best_norefine	hacienda1	0.99	0.76	1.35	1.09	0.64	0.48	0.34	0.24	0.14	0.08	0	0	0.95	0.8	1.4	1.22	0.53	0.45	0.31	0.26	0.15	0.11	0.01	0	1.04	0.72	1.29	0.92	0.76	0.52	0.37	0.22	0.13	0.04	0	0
DeepPruner_Best_norefine	hacienda4	0.59	0.53	0.9	0.79	0.35	0.32	0.19	0.15	0.05	0.02	0	0	0.66	0.58	1.03	0.94	0.38	0.34	0.2	0.19	0.07	0.03	0	0	0.52	0.46	0.73	0.59	0.31	0.3	0.17	0.11	0.02	0	0	0
DeepPruner_Best_norefine	hacienda8	2.89	1.68	11.01	6.06	0.47	0.5	0.16	0.14	0.09	0.06	0.08	0.04	3.17	1.77	13.21	6.51	0.53	0.53	0.24	0.22	0.08	0.06	0.05	0.04	2.79	1.65	10.07	5.89	0.45	0.49	0.14	0.11	0.09	0.05	0.09	0.05
DeepPruner_Best_norefine	landscape1_5	0.98	0.94	3.34	3.2	0.26	0.21	0.13	0.13	0.08	0.09	0.05	0.05	1.8	1.72	5.17	4.87	0.39	0.36	0.22	0.21	0.15	0.15	0.1	0.1	0.45	0.43	0.99	1.23	0.18	0.11	0.07	0.07	0.04	0.04	0.02	0.02
DeepPruner_Best_norefine	landscape1_6	0.65	0.61	2.07	1.97	0.21	0.18	0.1	0.1	0.05	0.05	0.03	0.03	1.16	1.11	3.05	2.91	0.36	0.34	0.2	0.19	0.12	0.12	0.07	0.06	0.24	0.2	0.34	0.3	0.09	0.06	0.02	0.02	0	0	0	0
DeepPruner_Best_norefine	landscape3_2	1.91	1.85	4.59	4.49	0.35	0.33	0.25	0.24	0.21	0.21	0.2	0.2	2.06	1.99	5.93	5.75	0.41	0.4	0.25	0.24	0.17	0.16	0.14	0.14	1.8	1.75	3.32	3.3	0.31	0.29	0.26	0.25	0.25	0.25	0.24	0.24
DeepPruner_Best_norefine	landscape5_2	3.32	0.6	8.85	0.73	0.61	0.49	0.32	0.14	0.17	0.01	0.12	0	3.27	0.98	8.35	1.14	0.72	0.79	0.44	0.42	0.18	0.07	0.1	0	3.34	0.52	8.95	0.61	0.59	0.43	0.29	0.08	0.16	0	0.12	0
DeepPruner_Best_norefine	living_room_1_1	0.82	0.5	1.29	0.94	0.44	0.26	0.27	0.13	0.14	0.06	0.01	0.01	1.09	0.78	1.58	1.27	0.57	0.44	0.37	0.23	0.2	0.1	0.03	0.02	0.52	0.18	0.83	0.26	0.29	0.06	0.16	0.01	0.06	0	0	0
DeepPruner_Best_norefine	living_room_2_3	0.47	0.27	0.66	0.42	0.36	0.15	0.12	0.04	0.02	0	0	0	0.72	0.45	1	0.66	0.47	0.31	0.28	0.09	0.08	0.02	0	0	0.41	0.23	0.55	0.33	0.33	0.11	0.08	0.02	0	0	0	0
DeepPruner_Fast_norefine	abstract_bowls_1	1.86	1.11	3.26	2.5	0.72	0.44	0.47	0.23	0.24	0.12	0.13	0.07	2.33	1.8	4.06	3.45	0.72	0.6	0.5	0.38	0.29	0.22	0.18	0.13	1.46	0.52	2.36	1.16	0.71	0.3	0.45	0.1	0.2	0.03	0.08	0.01
DeepPruner_Fast_norefine	abstract_bowls_14	3.46	0.85	5.47	1.92	0.82	0.38	0.66	0.2	0.46	0.08	0.28	0.03	3.18	1.46	5.32	2.86	0.82	0.56	0.64	0.35	0.41	0.17	0.21	0.08	3.63	0.48	5.56	0.97	0.83	0.27	0.68	0.11	0.49	0.03	0.33	0.01
DeepPruner_Fast_norefine	bones_3	6.85	5.6	12.49	11.3	0.75	0.66	0.58	0.48	0.41	0.35	0.3	0.25	7.81	7.04	13.6	12.96	0.79	0.74	0.62	0.57	0.45	0.42	0.34	0.31	4.74	2.45	9.63	6.29	0.67	0.48	0.51	0.3	0.32	0.2	0.2	0.13
DeepPruner_Fast_norefine	bones_6	8.73	6.03	15.74	12.52	0.82	0.67	0.66	0.47	0.5	0.32	0.37	0.25	9.4	6.6	16.47	13.22	0.83	0.72	0.66	0.53	0.5	0.35	0.39	0.27	6.22	3.9	12.62	9.43	0.81	0.47	0.63	0.26	0.48	0.2	0.31	0.17
DeepPruner_Fast_norefine	Chairs4	3.42	3.22	4.8	4.87	0.75	0.65	0.62	0.52	0.5	0.45	0.39	0.36	3.83	3.72	5.09	5.26	0.79	0.72	0.69	0.6	0.58	0.53	0.45	0.43	2.16	1.67	3.74	3.36	0.6	0.44	0.41	0.26	0.25	0.2	0.19	0.16
DeepPruner_Fast_norefine	chess_8	1.92	0.85	3.37	1.63	0.55	0.39	0.38	0.21	0.26	0.11	0.18	0.04	2.16	1.38	3.5	2.23	0.67	0.63	0.49	0.39	0.31	0.21	0.19	0.08	1.69	0.33	3.25	0.66	0.44	0.16	0.27	0.04	0.22	0.02	0.17	0.01
DeepPruner_Fast_norefine	childroom_1	0.93	0.47	1.82	0.95	0.49	0.24	0.21	0.08	0.09	0.03	0.05	0.01	1.17	0.77	2.13	1.42	0.54	0.41	0.31	0.19	0.14	0.08	0.07	0.03	0.76	0.26	1.55	0.35	0.45	0.11	0.14	0.01	0.05	0	0.03	0
DeepPruner_Fast_norefine	childroom_12	3.35	1.1	6.31	3.24	0.62	0.29	0.43	0.14	0.31	0.08	0.23	0.06	4.23	1.81	7.25	4.39	0.69	0.47	0.53	0.24	0.39	0.15	0.3	0.11	2.47	0.4	5.2	1.34	0.55	0.12	0.32	0.04	0.23	0.02	0.16	0.01
DeepPruner_Fast_norefine	childroom_2	2.62	1.77	6.92	6.02	0.65	0.42	0.48	0.25	0.31	0.14	0.12	0.08	3.92	3.21	9.67	8.59	0.74	0.67	0.57	0.44	0.35	0.27	0.18	0.15	1.41	0.44	2.38	1.28	0.56	0.2	0.4	0.06	0.27	0.02	0.06	0.01
DeepPruner_Fast_norefine	childroom_4	0.56	0.47	0.99	0.85	0.36	0.31	0.17	0.1	0.03	0.02	0.01	0	0.71	0.64	1.25	1.14	0.45	0.46	0.23	0.17	0.05	0.03	0.01	0.01	0.41	0.29	0.6	0.39	0.27	0.15	0.1	0.02	0.01	0	0	0
DeepPruner_Fast_norefine	childroom_6	0.87	0.54	1.54	1.33	0.58	0.24	0.23	0.09	0.07	0.04	0.03	0.02	1.15	0.83	2.07	1.86	0.63	0.36	0.3	0.16	0.12	0.08	0.06	0.04	0.63	0.29	0.85	0.53	0.53	0.14	0.16	0.02	0.03	0.01	0	0
DeepPruner_Fast_norefine	childroom_9	0.79	0.67	1.86	1.73	0.36	0.27	0.17	0.13	0.07	0.06	0.04	0.03	1.49	1.37	2.96	2.82	0.58	0.55	0.34	0.31	0.17	0.16	0.1	0.08	0.4	0.27	0.65	0.42	0.23	0.1	0.07	0.03	0.02	0.01	0	0
DeepPruner_Fast_norefine	cloth4	3.56	0.47	9.55	0.61	0.9	0.33	0.64	0.09	0.43	0.01	0.14	0	4.65	0.77	12.35	0.99	0.87	0.55	0.67	0.33	0.51	0.04	0.21	0	3.27	0.4	8.66	0.46	0.91	0.28	0.63	0.03	0.41	0	0.13	0
DeepPruner_Fast_norefine	cloth6	2.38	0.52	4.07	1	0.61	0.28	0.45	0.11	0.33	0.05	0.2	0.01	2.49	0.99	4.14	1.65	0.66	0.52	0.49	0.29	0.36	0.14	0.2	0.04	2.33	0.3	4.03	0.41	0.59	0.16	0.44	0.03	0.31	0	0.21	0
DeepPruner_Fast_norefine	cloth7	9.97	1.04	18.99	2.52	0.69	0.39	0.54	0.19	0.46	0.1	0.43	0.06	5.22	1.66	13.04	3.43	0.65	0.58	0.42	0.32	0.28	0.16	0.24	0.1	13.99	0.52	22.83	1.35	0.73	0.23	0.64	0.08	0.61	0.04	0.58	0.02
DeepPruner_Fast_norefine	coral6	1.84	0.87	3.34	1.91	0.53	0.33	0.36	0.18	0.25	0.11	0.16	0.05	2.85	1.69	4.42	2.96	0.69	0.59	0.52	0.38	0.41	0.24	0.28	0.13	1.21	0.37	2.43	0.7	0.42	0.17	0.26	0.05	0.16	0.02	0.09	0.01
DeepPruner_Fast_norefine	dining_room_1_1	8.32	7.78	14.22	14	0.79	0.71	0.68	0.61	0.55	0.48	0.42	0.36	9.32	9.77	15.85	16.36	0.83	0.79	0.7	0.68	0.56	0.53	0.42	0.42	6.91	4.93	11.49	9.69	0.74	0.6	0.65	0.51	0.53	0.41	0.43	0.28
DeepPruner_Fast_norefine	office_top5	1.15	0.55	1.73	1.12	0.6	0.27	0.38	0.12	0.17	0.06	0.05	0.03	1.44	1.07	2.22	1.78	0.63	0.54	0.42	0.28	0.22	0.14	0.11	0.07	0.99	0.28	1.41	0.5	0.58	0.13	0.36	0.03	0.14	0.01	0.02	0
DeepPruner_Fast_norefine	park1	0.72	0.51	1.03	0.86	0.54	0.29	0.18	0.12	0.05	0.04	0.01	0.01	0.86	0.75	1.29	1.16	0.54	0.47	0.29	0.23	0.1	0.08	0.02	0.01	0.56	0.25	0.64	0.33	0.53	0.1	0.07	0.01	0	0	0	0
DeepPruner_Fast_norefine	park10	1.64	1.43	3.31	3.09	0.55	0.48	0.35	0.3	0.21	0.18	0.11	0.09	2.21	2.06	4.02	3.83	0.67	0.67	0.46	0.45	0.29	0.27	0.16	0.14	0.61	0.3	1.25	0.57	0.31	0.14	0.14	0.03	0.06	0.01	0.02	0
DeepPruner_Fast_norefine	park6	2.31	1.98	5	5.08	0.6	0.4	0.37	0.24	0.22	0.16	0.14	0.12	5.07	4.89	8.22	8.55	0.81	0.7	0.65	0.56	0.5	0.43	0.37	0.33	0.91	0.5	1.87	1.34	0.5	0.25	0.23	0.08	0.08	0.03	0.03	0.01
DeepPruner_Fast_norefine	person1_1	16.36	1.88	25.2	5.89	0.73	0.22	0.6	0.14	0.54	0.11	0.52	0.09	13.11	5.23	21.81	10.4	0.68	0.51	0.52	0.34	0.45	0.28	0.44	0.25	17.39	0.81	26.19	3.39	0.75	0.13	0.63	0.07	0.57	0.05	0.55	0.04
DeepPruner_Fast_norefine	person1_3	3.57	2.4	9.8	8.16	0.5	0.37	0.37	0.22	0.26	0.15	0.17	0.1	6.45	4.95	14.27	12.25	0.69	0.63	0.56	0.44	0.41	0.32	0.29	0.23	2.04	1.04	6.21	4.69	0.4	0.23	0.27	0.1	0.18	0.05	0.11	0.03
DeepPruner_Fast_norefine	person1_8	9.19	3.25	17.23	9.73	0.63	0.33	0.5	0.21	0.43	0.18	0.39	0.16	9.02	4.44	18.55	11.46	0.61	0.53	0.45	0.33	0.39	0.26	0.36	0.23	9.23	2.95	16.89	9.26	0.64	0.28	0.52	0.18	0.44	0.16	0.4	0.14
DeepPruner_Fast_norefine	person2_5	1.37	0.49	1.97	0.9	0.68	0.27	0.49	0.11	0.22	0.04	0.06	0.01	1.52	0.87	2.31	1.42	0.65	0.53	0.46	0.28	0.27	0.1	0.09	0.02	1.29	0.28	1.75	0.37	0.7	0.13	0.51	0.01	0.19	0	0.04	0
DeepPruner_Fast_norefine	person3_10	1.06	0.65	1.95	1.52	0.55	0.29	0.32	0.13	0.12	0.06	0.04	0.03	1.87	1.43	3.27	2.73	0.68	0.57	0.46	0.35	0.27	0.17	0.12	0.1	0.77	0.37	1.11	0.65	0.5	0.19	0.27	0.05	0.07	0.02	0.01	0
DeepPruner_Fast_norefine	person3_3	2.8	0.71	5.05	1.96	0.68	0.28	0.48	0.12	0.29	0.05	0.21	0.03	4.11	1.87	6.95	3.82	0.82	0.6	0.64	0.38	0.39	0.2	0.26	0.12	2.36	0.32	4.21	0.46	0.64	0.17	0.42	0.03	0.26	0.01	0.2	0
DeepPruner_Fast_norefine	person3_4	3.17	1.38	7.58	4.13	0.56	0.38	0.36	0.17	0.18	0.09	0.14	0.06	4.44	2.98	9.33	6.76	0.65	0.57	0.42	0.35	0.24	0.21	0.2	0.16	2.45	0.47	6.38	0.92	0.5	0.28	0.32	0.07	0.14	0.03	0.1	0.01
DeepPruner_Fast_norefine	plant_vintage12	3.12	1.83	5.33	3.82	0.7	0.52	0.5	0.34	0.35	0.21	0.26	0.14	3.11	2.55	5.46	4.7	0.7	0.66	0.5	0.46	0.34	0.3	0.25	0.21	3.13	0.56	5.1	1.12	0.7	0.27	0.5	0.12	0.36	0.05	0.27	0.01
DeepPruner_Fast_norefine	plant_vintage14	5.88	0.4	14.39	0.66	0.86	0.21	0.7	0.08	0.45	0.02	0.25	0	4.1	0.75	13.74	1.11	0.77	0.5	0.57	0.25	0.35	0.08	0.12	0.01	6.6	0.26	14.64	0.34	0.9	0.09	0.75	0.01	0.49	0	0.3	0
DeepPruner_Fast_norefine	plant_vintage15	6.32	0.4	15.89	0.68	0.82	0.22	0.65	0.09	0.41	0.03	0.22	0	4.98	0.76	15.49	1.12	0.71	0.5	0.53	0.25	0.33	0.08	0.13	0.01	6.91	0.23	16.06	0.34	0.87	0.09	0.7	0.02	0.45	0	0.26	0
DeepPruner_Fast_norefine	plant_vintage2	1.49	0.46	1.95	0.62	0.84	0.34	0.55	0.09	0.24	0.01	0.06	0	1.36	0.67	1.86	0.86	0.79	0.56	0.52	0.21	0.19	0.02	0.05	0	1.56	0.34	2	0.42	0.87	0.22	0.57	0.02	0.27	0	0.06	0
DeepPruner_Fast_norefine	plant_vintage4	2.91	0.53	8.14	0.99	0.79	0.26	0.52	0.12	0.34	0.06	0.16	0.01	2.78	0.89	8.87	1.41	0.77	0.49	0.51	0.26	0.31	0.13	0.11	0.03	2.99	0.31	7.67	0.6	0.8	0.12	0.52	0.04	0.36	0.02	0.19	0
DeepPruner_Fast_norefine	plant_vintage7	1.77	1.45	3.49	3.2	0.61	0.43	0.34	0.24	0.2	0.16	0.13	0.11	2.51	2.33	4.53	4.29	0.66	0.62	0.45	0.4	0.29	0.27	0.2	0.19	0.89	0.4	1.47	0.72	0.55	0.2	0.21	0.05	0.1	0.02	0.04	0.01
DeepPruner_Fast_norefine	roundntwist4	2.82	1.5	3.63	1.9	0.88	0.72	0.75	0.59	0.58	0.3	0.23	0.03	2.01	1.26	2.75	1.73	0.79	0.62	0.6	0.43	0.41	0.27	0.11	0.03	4.05	1.86	4.64	2.13	1	0.87	0.97	0.82	0.84	0.36	0.4	0.03
DeepPruner_Fast_norefine	ScifiKnot1	1.46	0.67	2.62	1.41	0.49	0.28	0.33	0.15	0.19	0.09	0.14	0.04	2.04	1.28	3.22	2.17	0.65	0.53	0.48	0.32	0.29	0.2	0.19	0.09	1.11	0.3	2.16	0.55	0.4	0.12	0.25	0.05	0.13	0.02	0.11	0
DeepPruner_Fast_norefine	ScifiKnot4	2.84	1.06	5.01	2.89	0.7	0.38	0.53	0.18	0.38	0.1	0.2	0.06	3.92	2.74	6.73	5.49	0.75	0.64	0.59	0.45	0.45	0.3	0.27	0.19	2.47	0.49	4.26	0.93	0.68	0.29	0.51	0.09	0.36	0.03	0.17	0.01
DeepPruner_Fast_norefine	sleeping_room_1_11	0.52	0.36	0.87	0.66	0.31	0.2	0.13	0.05	0.04	0.01	0	0	0.86	0.68	1.33	1.16	0.56	0.45	0.28	0.17	0.09	0.05	0.01	0.01	0.39	0.25	0.62	0.32	0.22	0.11	0.07	0.01	0.02	0	0	0
DeepPruner_Fast_norefine	living_room_3_5	1.9	1.29	3.61	2.4	0.59	0.53	0.39	0.33	0.23	0.17	0.14	0.08	2.31	1.93	4.04	3.22	0.66	0.66	0.47	0.47	0.29	0.28	0.18	0.15	1.54	0.72	3.17	1.29	0.52	0.42	0.31	0.2	0.17	0.07	0.1	0.01
DeepPruner_Fast_norefine	living_room_3_9	0.92	0.35	1.26	0.54	0.67	0.22	0.3	0.05	0.09	0	0.01	0	1.05	0.53	1.44	0.82	0.7	0.41	0.39	0.13	0.12	0.01	0.01	0	0.85	0.26	1.16	0.33	0.66	0.12	0.25	0.01	0.08	0	0.01	0
DeepPruner_Fast_norefine	mannequins_10	7.41	9.4	15.61	18.3	0.67	0.59	0.53	0.45	0.41	0.37	0.31	0.32	9.86	12.77	18.71	21.85	0.76	0.75	0.62	0.6	0.49	0.49	0.39	0.41	3.15	3.52	7.6	9.3	0.52	0.32	0.36	0.17	0.27	0.16	0.17	0.15
DeepPruner_Fast_norefine	mannequins_12	6.03	2.41	9.04	5.77	0.75	0.44	0.64	0.26	0.59	0.18	0.48	0.14	5.8	4.1	9.56	7.79	0.65	0.64	0.53	0.43	0.45	0.32	0.39	0.26	6.25	0.75	8.49	2.55	0.84	0.25	0.76	0.09	0.72	0.05	0.58	0.03
DeepPruner_Fast_norefine	mannequins_2	4.65	2.02	7.74	4.91	0.68	0.5	0.58	0.31	0.5	0.2	0.35	0.12	4.15	2.82	7.72	5.94	0.64	0.64	0.53	0.44	0.43	0.3	0.27	0.17	5.63	0.45	7.78	1.44	0.76	0.23	0.69	0.06	0.65	0.02	0.5	0.01
DeepPruner_Fast_norefine	mannequins_5	1.35	0.84	2.27	1.68	0.55	0.38	0.38	0.2	0.19	0.1	0.1	0.05	1.57	1.21	2.6	2.13	0.58	0.55	0.42	0.32	0.23	0.15	0.13	0.08	1.04	0.3	1.69	0.55	0.51	0.15	0.32	0.03	0.13	0.01	0.06	0
DeepPruner_Fast_norefine	mannequins_9	2.91	1.93	5.22	4.35	0.6	0.53	0.47	0.33	0.39	0.19	0.22	0.11	2.98	2.52	5.49	5.09	0.63	0.64	0.47	0.44	0.38	0.27	0.2	0.15	2.74	0.62	4.55	1.89	0.55	0.29	0.46	0.08	0.43	0.03	0.27	0.02
DeepPruner_Fast_norefine	Minicubes4	4.13	3.85	6.87	6.63	0.67	0.57	0.51	0.44	0.4	0.37	0.32	0.31	3.98	3.67	6.72	6.39	0.7	0.63	0.53	0.48	0.41	0.37	0.3	0.29	4.42	4.19	7.13	7.04	0.62	0.46	0.46	0.38	0.37	0.35	0.35	0.34
DeepPruner_Fast_norefine	Minicubes5	4.19	3.58	6.88	6.2	0.72	0.59	0.54	0.45	0.41	0.36	0.33	0.31	3.28	2.91	5.54	5.21	0.7	0.63	0.54	0.45	0.38	0.33	0.27	0.25	5.5	4.54	8.44	7.4	0.74	0.53	0.54	0.44	0.45	0.41	0.42	0.39
DeepPruner_Fast_norefine	Minicubes9	4.22	1.26	5.76	2.41	0.8	0.48	0.68	0.31	0.57	0.18	0.43	0.08	3.18	1.88	4.81	3.12	0.74	0.67	0.6	0.48	0.46	0.3	0.29	0.13	5.55	0.47	6.78	0.88	0.87	0.24	0.79	0.09	0.7	0.03	0.61	0.01
DeepPruner_Fast_norefine	moto3	1	0.66	1.6	1.19	0.52	0.33	0.29	0.18	0.13	0.08	0.06	0.03	1.38	1.04	2.09	1.67	0.6	0.5	0.4	0.32	0.23	0.16	0.11	0.06	0.7	0.35	1.06	0.57	0.45	0.19	0.2	0.07	0.06	0.01	0.01	0
DeepPruner_Fast_norefine	music1_1	3.02	0.85	6.12	1.82	0.63	0.33	0.48	0.2	0.36	0.12	0.19	0.04	3.67	1.66	7.55	2.88	0.7	0.62	0.54	0.4	0.39	0.25	0.22	0.11	2.7	0.45	5.27	0.9	0.59	0.19	0.45	0.1	0.34	0.06	0.18	0.01
DeepPruner_Fast_norefine	music1_6	3.16	2.49	6.22	6.01	0.67	0.51	0.52	0.35	0.37	0.24	0.24	0.15	4.06	3.69	7.56	7.58	0.73	0.69	0.59	0.52	0.45	0.36	0.3	0.23	1.83	0.71	3.37	2.18	0.58	0.25	0.43	0.11	0.26	0.05	0.14	0.03
DeepPruner_Fast_norefine	music1_7	0.89	0.51	1.42	0.99	0.46	0.23	0.28	0.12	0.13	0.06	0.03	0.02	1.5	1.12	2.15	1.72	0.65	0.54	0.45	0.34	0.28	0.19	0.1	0.06	0.63	0.25	0.95	0.38	0.38	0.09	0.21	0.03	0.06	0.01	0	0
DeepPruner_Fast_norefine	music1_9	7.73	1.71	13.14	4.85	0.76	0.38	0.67	0.2	0.56	0.12	0.43	0.09	6.44	2.98	11.83	6.96	0.71	0.67	0.6	0.45	0.47	0.24	0.31	0.14	8.09	1.35	13.49	4.07	0.77	0.3	0.68	0.14	0.59	0.09	0.46	0.07
DeepPruner_Fast_norefine	nest5	5.82	4.46	19.55	19.22	0.79	0.62	0.63	0.44	0.46	0.32	0.31	0.22	6.91	6.52	24.44	24.44	0.79	0.8	0.64	0.62	0.49	0.46	0.34	0.32	4.53	1.99	11.19	9.88	0.78	0.41	0.62	0.22	0.43	0.16	0.27	0.1
DeepPruner_Fast_norefine	office1	2.22	0.43	4.92	0.6	0.73	0.28	0.46	0.08	0.25	0.01	0.1	0	1.29	0.63	1.92	0.85	0.65	0.49	0.44	0.2	0.21	0.04	0.03	0	2.74	0.32	5.97	0.4	0.77	0.16	0.46	0.02	0.28	0	0.13	0
DeepPruner_Fast_norefine	office12	4.66	1.45	8.06	3.95	0.72	0.31	0.59	0.17	0.44	0.12	0.27	0.09	7.03	3.01	10.57	6.13	0.8	0.55	0.68	0.36	0.56	0.26	0.41	0.2	3.4	0.63	6.34	1.99	0.68	0.18	0.55	0.08	0.37	0.05	0.2	0.03
DeepPruner_Fast_norefine	office14	3.11	1.75	7.02	4.95	0.58	0.42	0.41	0.26	0.27	0.16	0.17	0.09	3.78	3.05	7.75	6.82	0.73	0.67	0.56	0.46	0.36	0.3	0.22	0.18	2.63	0.82	6.46	2.99	0.47	0.24	0.3	0.12	0.2	0.06	0.13	0.03
DeepPruner_Fast_norefine	office2	2.98	0.32	7.41	0.44	0.85	0.19	0.49	0.04	0.22	0	0.11	0	1.52	0.54	3.17	0.68	0.77	0.48	0.47	0.13	0.19	0	0.04	0	3.51	0.24	8.43	0.3	0.88	0.08	0.5	0.01	0.23	0	0.13	0
DeepPruner_Fast_norefine	sleeping_room_1_15	0.95	0.48	1.3	0.73	0.57	0.3	0.41	0.13	0.13	0.03	0.01	0	1.06	0.73	1.42	1.02	0.63	0.5	0.43	0.26	0.17	0.07	0.01	0	0.86	0.28	1.19	0.39	0.52	0.14	0.39	0.03	0.09	0	0.01	0
DeepPruner_Fast_norefine	sleeping_room_1_3	0.81	0.56	1.2	0.86	0.56	0.39	0.29	0.17	0.07	0.03	0.01	0.01	1.06	0.83	1.61	1.22	0.62	0.56	0.38	0.32	0.12	0.05	0.04	0.02	0.73	0.47	1.02	0.71	0.54	0.33	0.27	0.13	0.05	0.02	0.01	0
DeepPruner_Fast_norefine	sleeping_room_1_7	0.91	0.73	1.51	1.39	0.52	0.39	0.24	0.15	0.11	0.08	0.04	0.03	1.33	1.29	2.16	2.23	0.6	0.53	0.36	0.29	0.19	0.2	0.1	0.1	0.72	0.48	1.11	0.74	0.48	0.32	0.18	0.09	0.07	0.03	0.02	0
DeepPruner_Fast_norefine	spaceStation2	10.86	11.13	14.12	14.55	0.8	0.82	0.73	0.73	0.7	0.7	0.69	0.69	4.81	4.91	8.38	8.53	0.64	0.67	0.47	0.46	0.37	0.38	0.35	0.35	13.93	14.3	16.27	16.81	0.89	0.89	0.86	0.86	0.86	0.86	0.86	0.86
DeepPruner_Fast_norefine	stack_circles4	16.11	1.63	25.46	3.98	0.78	0.37	0.65	0.22	0.59	0.15	0.55	0.11	8.99	2.98	17.89	5.85	0.74	0.6	0.59	0.4	0.45	0.28	0.37	0.2	20.08	0.87	28.83	2.36	0.8	0.25	0.69	0.12	0.67	0.08	0.66	0.06
DeepPruner_Fast_norefine	stack_circles9	12.44	1.94	20.28	4.68	0.78	0.35	0.71	0.24	0.66	0.17	0.62	0.13	7.54	3.21	15.15	6.18	0.65	0.54	0.52	0.39	0.44	0.29	0.39	0.22	15.52	1.14	22.93	3.41	0.86	0.23	0.83	0.15	0.81	0.09	0.77	0.07
DeepPruner_Fast_norefine	time_travellers_10	33.16	8.19	43.48	18.15	0.81	0.44	0.67	0.33	0.6	0.27	0.58	0.24	26	13.47	38.23	24.65	0.78	0.72	0.63	0.53	0.52	0.41	0.46	0.34	36.07	6.04	45.44	14.69	0.81	0.32	0.69	0.24	0.64	0.21	0.63	0.19
DeepPruner_Fast_norefine	time_travellers_13	9.47	1.7	12.41	4.32	0.82	0.35	0.72	0.22	0.64	0.15	0.62	0.11	6.8	3.29	10.37	6.38	0.68	0.61	0.55	0.44	0.47	0.31	0.45	0.22	11.31	0.6	13.64	1.86	0.91	0.17	0.83	0.07	0.76	0.04	0.73	0.03
DeepPruner_Fast_norefine	time_travellers_15	12.64	3.58	17.26	9.14	0.77	0.36	0.66	0.23	0.58	0.17	0.56	0.15	10.13	6.95	15.95	12.87	0.73	0.65	0.57	0.48	0.44	0.36	0.41	0.3	14.09	1.63	17.98	6	0.8	0.19	0.71	0.09	0.65	0.07	0.65	0.06
DeepPruner_Fast_norefine	time_travellers_2	7.12	2.78	10.47	6.49	0.74	0.47	0.62	0.31	0.55	0.22	0.49	0.16	6.14	4.3	10.23	8.33	0.66	0.68	0.53	0.49	0.43	0.35	0.37	0.26	7.83	1.68	10.64	4.73	0.79	0.32	0.68	0.18	0.63	0.12	0.58	0.1
DeepPruner_Fast_norefine	time_travellers_20	5.91	0.62	7.33	1.57	0.83	0.21	0.76	0.11	0.7	0.07	0.61	0.04	4.74	1.43	6.61	2.67	0.71	0.51	0.6	0.32	0.53	0.19	0.47	0.11	6.51	0.21	7.67	0.32	0.89	0.06	0.84	0.01	0.79	0	0.68	0
DeepPruner_Fast_norefine	time_travellers_24	42.43	6.7	50.04	16.94	0.92	0.38	0.86	0.28	0.79	0.23	0.75	0.19	30.26	10.15	42.47	21.45	0.85	0.63	0.76	0.49	0.64	0.39	0.56	0.31	46.57	5.53	52.36	15.1	0.95	0.29	0.9	0.2	0.84	0.17	0.82	0.15
DeepPruner_Fast_norefine	time_travellers_25	14.31	5.07	21.81	11.79	0.71	0.48	0.6	0.34	0.54	0.27	0.52	0.22	12.91	6.66	20.75	13.28	0.74	0.66	0.6	0.5	0.49	0.37	0.45	0.3	15.24	4.02	22.49	10.7	0.69	0.36	0.61	0.24	0.56	0.2	0.56	0.16
DeepPruner_Fast_norefine	time_travellers_3	12.04	3.88	17.04	10.25	0.78	0.48	0.68	0.33	0.62	0.24	0.59	0.17	9.59	5.79	15.68	12.28	0.73	0.69	0.6	0.54	0.5	0.41	0.45	0.29	13.87	2.45	17.99	8.43	0.82	0.33	0.74	0.17	0.7	0.12	0.69	0.08
DeepPruner_Fast_norefine	twirls2	1.62	0.63	2.47	1.09	0.62	0.36	0.4	0.18	0.31	0.05	0.14	0.01	1.94	1.03	2.77	1.61	0.71	0.55	0.52	0.36	0.38	0.13	0.15	0.04	1.42	0.37	2.25	0.52	0.55	0.25	0.32	0.07	0.26	0	0.13	0
DeepPruner_Fast_norefine	twirls3	1.38	0.5	1.91	0.91	0.76	0.27	0.41	0.11	0.24	0.04	0.05	0.01	1.7	0.9	2.37	1.44	0.74	0.51	0.49	0.28	0.32	0.11	0.12	0.04	1.22	0.29	1.64	0.45	0.77	0.15	0.37	0.03	0.2	0.01	0.02	0
DeepPruner_Fast_norefine	voronoid_sphere6	5.88	6.7	11.73	13.23	0.61	0.54	0.41	0.38	0.31	0.29	0.25	0.27	7.47	8.98	13.36	15.41	0.69	0.68	0.5	0.51	0.4	0.4	0.33	0.36	3.19	2.87	8.32	8.36	0.48	0.29	0.25	0.15	0.15	0.11	0.12	0.11
DeepPruner_Fast_norefine	voronoid_sphere9	4.99	3.66	7.63	6.49	0.61	0.51	0.49	0.42	0.46	0.35	0.42	0.28	4.14	3.91	6.83	6.82	0.56	0.48	0.43	0.41	0.4	0.37	0.35	0.31	9.94	2.2	11.23	4.11	0.85	0.7	0.84	0.45	0.84	0.26	0.84	0.14
DeepPruner_Fast_norefine	walker4	6.2	2.06	7.72	4.16	0.83	0.39	0.75	0.29	0.69	0.22	0.62	0.17	5.23	3.43	7.33	5.68	0.71	0.55	0.57	0.43	0.51	0.35	0.47	0.31	6.8	1.21	7.96	2.84	0.91	0.3	0.86	0.2	0.8	0.13	0.71	0.09
DeepPruner_Fast_norefine	windmills4	1.2	0.49	1.69	0.83	0.76	0.3	0.39	0.09	0.15	0.04	0.05	0.01	1.73	1.05	2.54	1.58	0.73	0.58	0.49	0.33	0.27	0.17	0.16	0.04	1.05	0.33	1.37	0.44	0.76	0.23	0.36	0.03	0.11	0	0.02	0
DeepPruner_Fast_norefine	youngster_room10	1.24	0.73	2.67	1.85	0.44	0.29	0.29	0.15	0.15	0.07	0.07	0.03	2.16	1.58	4.05	3.17	0.62	0.58	0.45	0.36	0.29	0.2	0.15	0.09	0.8	0.32	1.64	0.5	0.36	0.15	0.22	0.05	0.09	0.01	0.04	0
DeepPruner_Fast_norefine	youngster_room14	2.89	1.23	4.6	2.3	0.72	0.52	0.55	0.31	0.37	0.16	0.26	0.07	2.49	1.79	4.23	3.16	0.7	0.62	0.5	0.41	0.3	0.25	0.2	0.12	3.1	0.92	4.79	1.66	0.73	0.47	0.57	0.26	0.41	0.11	0.29	0.04
DeepPruner_Fast_norefine	youngster_room4	0.71	0.5	1.3	1.04	0.38	0.27	0.2	0.12	0.07	0.03	0.02	0.01	1.04	0.91	1.83	1.66	0.53	0.49	0.32	0.26	0.12	0.08	0.04	0.04	0.55	0.3	0.92	0.5	0.31	0.16	0.15	0.05	0.04	0.01	0.01	0
DeepPruner_Fast_norefine	youngster_room7	1.17	0.75	2.19	1.64	0.52	0.29	0.32	0.14	0.12	0.09	0.07	0.05	1.63	1.24	2.87	2.32	0.6	0.5	0.41	0.26	0.2	0.15	0.12	0.09	0.94	0.5	1.75	1.16	0.48	0.19	0.27	0.07	0.08	0.05	0.05	0.03
DeepPruner_Fast_norefine	youngster_room9	0.72	0.48	1.33	1.12	0.48	0.22	0.17	0.08	0.05	0.04	0.02	0.02	1.13	0.97	2.13	1.93	0.55	0.5	0.32	0.22	0.12	0.1	0.06	0.05	0.55	0.27	0.77	0.45	0.45	0.11	0.1	0.02	0.02	0.01	0	0
DeepPruner_Fast_norefine	dining_room_1_13	1.39	0.68	2.22	1.71	0.61	0.31	0.43	0.13	0.23	0.05	0.07	0.02	1.51	1.1	2.49	2.25	0.65	0.6	0.45	0.29	0.24	0.09	0.07	0.04	1.32	0.42	2.03	1.27	0.59	0.14	0.42	0.03	0.22	0.02	0.07	0.01
DeepPruner_Fast_norefine	living_room_3_2	1.17	0.43	1.6	0.81	0.73	0.25	0.41	0.07	0.16	0.02	0.03	0.01	1.47	0.9	2.17	1.57	0.72	0.52	0.45	0.26	0.25	0.08	0.07	0.03	1.08	0.29	1.4	0.38	0.73	0.18	0.39	0.01	0.13	0	0.02	0
DeepPruner_Fast_norefine	office_top4	1.34	0.37	2.1	0.5	0.69	0.23	0.39	0.06	0.19	0	0.07	0	1.34	0.58	2.16	0.75	0.7	0.48	0.46	0.17	0.19	0.01	0.04	0	1.34	0.27	2.07	0.34	0.68	0.12	0.36	0	0.19	0	0.09	0
DeepPruner_Fast_norefine	sleeping_room_1_13	2.91	0.51	6.57	0.87	0.62	0.33	0.42	0.1	0.24	0.03	0.16	0.01	2.42	0.92	6.67	1.49	0.65	0.58	0.42	0.28	0.21	0.09	0.11	0.03	3.07	0.36	6.53	0.51	0.6	0.24	0.42	0.04	0.25	0.01	0.18	0
DeepPruner_Fast_norefine	dining_room_1_5	1.62	1.24	2.9	2.66	0.68	0.53	0.45	0.29	0.22	0.13	0.08	0.07	2.17	1.96	3.82	3.7	0.71	0.67	0.51	0.45	0.3	0.24	0.14	0.13	1.09	0.54	1.54	0.85	0.66	0.39	0.4	0.13	0.13	0.03	0.03	0
DeepPruner_Fast_norefine	dining_room_1_7	7.08	4.08	11.92	9.02	0.76	0.53	0.64	0.36	0.49	0.26	0.36	0.19	6.8	5.71	11.61	10.64	0.79	0.74	0.67	0.56	0.52	0.39	0.35	0.28	7.41	2.2	12.26	6.66	0.72	0.3	0.61	0.14	0.46	0.1	0.38	0.09
DeepPruner_Fast_norefine	dining_room_1_9	1.07	0.84	1.87	1.65	0.57	0.46	0.37	0.22	0.12	0.08	0.03	0.03	1.41	1.19	2.42	2.18	0.63	0.59	0.45	0.35	0.2	0.14	0.06	0.05	0.71	0.44	0.97	0.71	0.5	0.32	0.27	0.09	0.04	0.02	0	0
DeepPruner_Fast_norefine	floating_cubes1	3.74	1.92	4.89	3.03	0.74	0.53	0.6	0.42	0.57	0.36	0.51	0.2	3.73	2.48	4.98	3.65	0.75	0.62	0.59	0.51	0.54	0.43	0.48	0.29	3.74	1.5	4.82	2.46	0.72	0.46	0.61	0.36	0.6	0.31	0.53	0.13
DeepPruner_Fast_norefine	fruit1	1.51	0.88	2.04	1.38	0.8	0.49	0.48	0.24	0.25	0.13	0.07	0.03	1.67	1.04	2.29	1.54	0.79	0.61	0.56	0.33	0.29	0.15	0.09	0.03	1.41	0.79	1.9	1.29	0.8	0.43	0.44	0.18	0.23	0.13	0.06	0.03
DeepPruner_Fast_norefine	fruit6	1.47	0.87	2.93	1.88	0.39	0.38	0.25	0.2	0.18	0.1	0.15	0.04	2.56	1.95	4.12	3.32	0.69	0.71	0.49	0.48	0.33	0.27	0.25	0.14	1.03	0.44	2.27	0.73	0.27	0.25	0.16	0.08	0.13	0.03	0.12	0
DeepPruner_Fast_norefine	fruit8	1.95	0.51	6.1	0.93	0.4	0.28	0.27	0.12	0.15	0.04	0.07	0.01	2.25	0.99	6.2	1.49	0.57	0.59	0.43	0.34	0.26	0.12	0.09	0.03	1.81	0.28	6.06	0.5	0.32	0.13	0.2	0.02	0.09	0.01	0.07	0
DeepPruner_Fast_norefine	hacienda1	1.59	1.06	1.94	1.45	0.85	0.63	0.61	0.34	0.32	0.17	0.03	0.01	1.4	1.07	1.87	1.49	0.75	0.64	0.45	0.35	0.26	0.17	0.04	0.01	1.81	1.04	2.03	1.41	0.96	0.61	0.79	0.33	0.38	0.17	0.02	0.01
DeepPruner_Fast_norefine	hacienda4	0.74	0.66	1.07	0.97	0.48	0.41	0.22	0.2	0.1	0.06	0	0	0.82	0.72	1.18	1.08	0.55	0.45	0.25	0.22	0.1	0.07	0	0	0.65	0.59	0.93	0.82	0.4	0.36	0.19	0.17	0.1	0.04	0	0
DeepPruner_Fast_norefine	hacienda8	9.05	11.81	23.67	28.85	0.85	0.65	0.44	0.37	0.19	0.21	0.16	0.19	5.01	5.79	17.01	18.34	0.83	0.86	0.48	0.53	0.15	0.19	0.07	0.12	10.56	14.05	25.72	31.89	0.86	0.58	0.43	0.32	0.21	0.22	0.19	0.21
DeepPruner_Fast_norefine	landscape1_5	1.32	1.22	3.65	3.56	0.5	0.44	0.24	0.21	0.12	0.09	0.05	0.05	2.43	2.29	5.63	5.46	0.62	0.6	0.41	0.38	0.24	0.21	0.13	0.12	0.6	0.52	1.18	1.23	0.42	0.33	0.13	0.09	0.04	0.02	0	0
DeepPruner_Fast_norefine	landscape1_6	1.05	0.93	2.55	2.26	0.43	0.37	0.21	0.18	0.11	0.1	0.05	0.05	1.84	1.65	3.74	3.31	0.6	0.57	0.38	0.36	0.22	0.2	0.12	0.11	0.4	0.33	0.59	0.47	0.29	0.21	0.06	0.04	0.01	0.01	0	0
DeepPruner_Fast_norefine	landscape3_2	2.94	3.4	6.66	7.53	0.5	0.51	0.32	0.33	0.26	0.26	0.22	0.22	3.51	3.43	8.72	8.3	0.62	0.62	0.37	0.39	0.25	0.25	0.18	0.18	2.53	3.38	4.64	6.91	0.42	0.43	0.29	0.29	0.27	0.27	0.25	0.25
DeepPruner_Fast_norefine	landscape5_2	28.42	0.94	43.89	1.1	0.92	0.78	0.77	0.35	0.58	0.06	0.47	0	17.28	1.11	35.55	1.35	0.84	0.74	0.63	0.5	0.38	0.14	0.23	0	30.73	0.91	45.43	1.04	0.94	0.79	0.8	0.32	0.62	0.05	0.53	0
DeepPruner_Fast_norefine	living_room_1_1	1.11	0.63	1.52	1.01	0.67	0.37	0.39	0.19	0.18	0.06	0.02	0.01	1.32	0.92	1.79	1.33	0.69	0.57	0.47	0.31	0.25	0.12	0.03	0.02	0.88	0.31	1.14	0.43	0.64	0.15	0.29	0.04	0.09	0	0	0
DeepPruner_Fast_norefine	living_room_2_3	0.81	0.34	0.99	0.45	0.64	0.19	0.27	0.03	0.05	0	0	0	1.12	0.55	1.38	0.74	0.69	0.43	0.46	0.14	0.17	0.02	0	0	0.73	0.28	0.87	0.35	0.63	0.13	0.22	0	0.03	0	0	0
GANet	abstract_bowls_1	2.4	1.22	5.04	3.88	0.69	0.29	0.44	0.15	0.25	0.09	0.15	0.07	2.6	1.89	5.6	4.97	0.64	0.44	0.4	0.25	0.26	0.15	0.17	0.12	2.23	0.63	4.49	2.6	0.74	0.16	0.48	0.05	0.24	0.03	0.13	0.03
GANet	abstract_bowls_14	3.99	0.95	7.78	3.02	0.73	0.27	0.56	0.14	0.42	0.08	0.29	0.05	3.67	1.72	8.19	4.41	0.67	0.44	0.49	0.26	0.33	0.16	0.22	0.1	4.18	0.48	7.52	1.68	0.77	0.17	0.6	0.06	0.47	0.03	0.34	0.02
GANet	bones_3	3.3	2.85	8.24	7.8	0.6	0.42	0.35	0.25	0.21	0.16	0.13	0.12	4.23	3.92	9.69	9.34	0.62	0.53	0.41	0.34	0.25	0.23	0.18	0.17	1.25	0.5	3.3	1.71	0.56	0.18	0.22	0.05	0.13	0.03	0.04	0.02
GANet	bones_6	3.67	3.98	9.45	10.71	0.71	0.55	0.39	0.3	0.21	0.18	0.13	0.13	4.34	4.91	10.6	12.01	0.7	0.61	0.41	0.37	0.23	0.22	0.16	0.17	1.15	0.52	1.86	1.85	0.75	0.29	0.33	0.03	0.14	0.01	0.03	0.01
GANet	Chairs4	3.41	2.22	6.5	6.67	0.59	0.37	0.47	0.27	0.4	0.21	0.32	0.15	3.84	2.71	6.98	7.17	0.68	0.47	0.54	0.35	0.46	0.27	0.36	0.19	2.06	0.7	4.7	4.76	0.32	0.07	0.26	0.03	0.22	0.02	0.17	0.01
GANet	chess_8	2.11	1.12	4.69	4.66	0.46	0.19	0.3	0.1	0.23	0.07	0.18	0.05	2.41	1.71	5.36	5.76	0.51	0.31	0.35	0.16	0.26	0.12	0.19	0.09	1.82	0.56	3.94	3.28	0.4	0.07	0.25	0.04	0.21	0.03	0.18	0.02
GANet	childroom_1	0.97	0.45	2.07	1.11	0.56	0.19	0.25	0.05	0.06	0.03	0.03	0.01	1.26	0.68	2.77	1.65	0.57	0.3	0.31	0.12	0.11	0.06	0.06	0.03	0.77	0.29	1.39	0.43	0.55	0.12	0.21	0.01	0.02	0	0.01	0
GANet	childroom_12	2.13	1.04	5.24	3.72	0.56	0.21	0.3	0.09	0.12	0.06	0.1	0.05	2.18	1.54	5.29	4.53	0.65	0.33	0.35	0.16	0.12	0.1	0.1	0.08	2.09	0.54	5.19	2.69	0.47	0.08	0.25	0.03	0.12	0.02	0.11	0.02
GANet	childroom_2	3.03	2.44	8.37	8.71	0.66	0.27	0.48	0.17	0.32	0.12	0.11	0.09	3.88	3.56	10.44	10.61	0.66	0.45	0.47	0.28	0.3	0.18	0.15	0.13	2.25	1.41	5.83	6.47	0.67	0.11	0.48	0.07	0.33	0.06	0.07	0.05
GANet	childroom_4	0.95	1.02	3.18	5.95	0.36	0.18	0.18	0.07	0.05	0.04	0.03	0.03	1.21	1.37	3.81	6.28	0.43	0.3	0.23	0.12	0.07	0.06	0.04	0.04	0.68	0.67	2.36	5.58	0.28	0.05	0.13	0.02	0.02	0.02	0.02	0.01
GANet	childroom_6	1.15	0.59	2.59	1.65	0.54	0.25	0.22	0.07	0.09	0.04	0.06	0.02	1.39	0.86	3.12	2.3	0.53	0.36	0.25	0.13	0.12	0.07	0.08	0.04	0.95	0.35	2.02	0.71	0.55	0.17	0.19	0.02	0.06	0.01	0.03	0
GANet	childroom_9	2.24	2.62	8.06	9.76	0.35	0.19	0.15	0.11	0.1	0.09	0.07	0.08	1.87	2.65	5.54	8.68	0.47	0.35	0.24	0.19	0.15	0.13	0.1	0.1	2.46	2.61	9.2	10.32	0.28	0.1	0.09	0.07	0.07	0.07	0.06	0.06
GANet	cloth4	1.3	0.37	1.84	0.53	0.67	0.19	0.52	0.04	0.2	0	0.04	0	1.7	0.62	2.43	0.92	0.72	0.46	0.57	0.18	0.32	0.02	0.08	0	1.2	0.31	1.65	0.36	0.65	0.12	0.5	0.01	0.17	0	0.03	0
GANet	cloth6	1.56	0.58	2.79	1.67	0.69	0.29	0.48	0.08	0.22	0.03	0.06	0.02	2.04	0.95	3.62	2.47	0.71	0.44	0.53	0.19	0.31	0.08	0.11	0.03	1.34	0.41	2.29	1.1	0.68	0.22	0.45	0.03	0.18	0.01	0.04	0.01
GANet	cloth7	4.67	1	9.35	3.69	0.7	0.26	0.53	0.1	0.43	0.05	0.36	0.04	3.39	1.48	6.2	4.37	0.64	0.43	0.42	0.18	0.28	0.09	0.25	0.07	5.74	0.6	11.34	2.98	0.74	0.12	0.63	0.03	0.55	0.02	0.45	0.02
GANet	coral6	2.51	1.38	4.56	5.7	0.7	0.18	0.54	0.11	0.35	0.08	0.18	0.06	3.57	2.3	6.13	6.99	0.74	0.38	0.58	0.23	0.44	0.16	0.3	0.11	1.86	0.81	3.22	4.73	0.67	0.05	0.51	0.03	0.29	0.02	0.1	0.02
GANet	dining_room_1_1	5.19	4.83	11.89	11.54	0.6	0.52	0.43	0.36	0.28	0.27	0.21	0.2	6.8	6.35	13.88	13.28	0.68	0.63	0.52	0.49	0.37	0.36	0.28	0.27	2.9	2.67	8.25	8.46	0.48	0.36	0.3	0.19	0.15	0.14	0.12	0.11
GANet	office_top5	1.01	0.49	2.09	1.18	0.56	0.2	0.23	0.07	0.09	0.03	0.05	0.02	1.42	0.85	2.92	1.93	0.56	0.36	0.3	0.17	0.17	0.09	0.1	0.05	0.8	0.3	1.46	0.39	0.57	0.11	0.19	0.01	0.06	0	0.02	0
GANet	park1	0.6	0.42	0.94	0.8	0.4	0.2	0.12	0.08	0.04	0.03	0.01	0.01	0.73	0.61	1.2	1.08	0.44	0.36	0.21	0.16	0.07	0.06	0.02	0.02	0.45	0.21	0.52	0.26	0.35	0.04	0.03	0	0	0	0	0
GANet	park10	1.4	1.71	3.3	6.24	0.48	0.36	0.24	0.22	0.14	0.14	0.09	0.09	1.94	2.54	4.09	7.74	0.56	0.54	0.33	0.33	0.21	0.22	0.13	0.14	0.42	0.2	0.59	1.01	0.34	0.03	0.05	0	0	0	0	0
GANet	park6	1.92	2.32	5.14	9.17	0.57	0.25	0.29	0.14	0.15	0.1	0.08	0.08	4.08	4.88	8.6	13.17	0.66	0.51	0.45	0.34	0.3	0.25	0.21	0.2	0.82	1.03	1.53	6.22	0.52	0.12	0.22	0.04	0.08	0.03	0.02	0.03
GANet	person1_1	15.18	1.19	29.48	4.56	0.63	0.11	0.48	0.07	0.45	0.06	0.42	0.05	8.61	3.48	14.23	8.4	0.57	0.32	0.41	0.2	0.38	0.17	0.36	0.16	17.26	0.46	32.87	2.24	0.65	0.05	0.51	0.02	0.47	0.02	0.44	0.02
GANet	person1_3	1.81	2.56	6.16	9.24	0.39	0.35	0.27	0.22	0.17	0.12	0.09	0.08	3.78	4.27	10.11	11.92	0.58	0.48	0.42	0.31	0.29	0.21	0.17	0.15	0.76	1.65	1.92	7.43	0.29	0.28	0.19	0.17	0.1	0.07	0.04	0.04
GANet	person1_8	5.96	0.7	11.85	2.14	0.63	0.24	0.43	0.07	0.36	0.04	0.34	0.04	5.31	1.87	8.62	4.42	0.55	0.31	0.44	0.22	0.4	0.16	0.38	0.14	6.12	0.42	12.51	0.96	0.65	0.22	0.43	0.04	0.35	0.01	0.33	0.01
GANet	person2_5	2.53	1.01	5.69	4.96	0.59	0.18	0.39	0.08	0.25	0.05	0.17	0.04	2.76	1.43	6.19	5.39	0.6	0.35	0.4	0.16	0.26	0.09	0.18	0.06	2.41	0.77	5.39	4.69	0.58	0.08	0.39	0.03	0.25	0.03	0.16	0.02
GANet	person3_10	1.77	2.04	4.92	7.91	0.55	0.21	0.36	0.11	0.21	0.07	0.07	0.06	3.4	3.35	8.32	10.14	0.66	0.47	0.43	0.27	0.26	0.14	0.18	0.1	1.17	1.56	2.77	6.91	0.51	0.12	0.33	0.05	0.19	0.05	0.04	0.04
GANet	person3_3	2.63	1.83	6.84	8.43	0.64	0.18	0.46	0.1	0.22	0.06	0.09	0.05	4.71	3.12	10.07	9.62	0.67	0.41	0.46	0.22	0.3	0.14	0.2	0.11	1.94	1.39	5.33	7.98	0.63	0.1	0.47	0.06	0.19	0.03	0.05	0.03
GANet	person3_4	3.15	1.65	7.75	5.88	0.52	0.23	0.32	0.12	0.19	0.08	0.15	0.07	4.28	2.73	9.52	7.5	0.57	0.37	0.34	0.21	0.22	0.15	0.18	0.13	2.51	1.03	6.53	4.72	0.49	0.14	0.32	0.07	0.17	0.04	0.12	0.03
GANet	plant_vintage12	2.7	1.85	5.74	4.95	0.57	0.39	0.4	0.21	0.27	0.14	0.18	0.1	3.04	2.62	6.3	5.99	0.58	0.51	0.41	0.32	0.28	0.22	0.2	0.15	2.09	0.48	4.57	2.09	0.56	0.17	0.39	0.02	0.25	0.01	0.14	0.01
GANet	plant_vintage14	1.02	0.37	2.07	0.75	0.48	0.19	0.23	0.05	0.11	0.02	0.05	0	1.6	0.69	3.01	1.32	0.63	0.44	0.39	0.16	0.22	0.05	0.08	0.01	0.78	0.25	1.52	0.3	0.42	0.09	0.17	0	0.06	0	0.03	0
GANet	plant_vintage15	0.93	0.37	1.8	0.73	0.47	0.15	0.22	0.05	0.11	0.02	0.03	0	1.36	0.67	2.41	1.24	0.58	0.39	0.38	0.17	0.21	0.06	0.05	0.02	0.73	0.24	1.45	0.28	0.43	0.04	0.16	0	0.06	0	0.02	0
GANet	plant_vintage2	1.21	0.42	3.73	1	0.6	0.18	0.29	0.05	0.09	0.01	0.05	0.01	1.91	0.68	5.98	1.6	0.65	0.38	0.41	0.14	0.15	0.04	0.09	0.03	0.82	0.27	1.25	0.31	0.57	0.06	0.23	0	0.06	0	0.03	0
GANet	plant_vintage4	0.74	0.42	1.19	0.72	0.46	0.23	0.21	0.07	0.08	0.03	0.02	0.01	1.07	0.69	1.63	1.11	0.57	0.44	0.35	0.18	0.16	0.07	0.05	0.02	0.54	0.25	0.81	0.31	0.39	0.1	0.12	0	0.03	0	0.01	0
GANet	plant_vintage7	1.24	0.99	2.81	2.62	0.45	0.29	0.24	0.13	0.11	0.09	0.09	0.07	1.82	1.63	3.71	3.54	0.52	0.45	0.32	0.25	0.19	0.16	0.15	0.13	0.56	0.22	0.97	0.29	0.36	0.09	0.14	0	0.03	0	0.01	0
GANet	roundntwist4	1.89	0.68	4.88	1.02	0.76	0.41	0.6	0.21	0.4	0.08	0.05	0.01	1.67	0.84	5.92	1.25	0.65	0.47	0.46	0.31	0.3	0.13	0.03	0.01	2.23	0.43	2.61	0.54	0.92	0.32	0.8	0.06	0.55	0	0.08	0
GANet	ScifiKnot1	1.69	0.52	3.2	1.26	0.53	0.18	0.33	0.09	0.23	0.05	0.14	0.03	2.29	0.99	4.07	1.98	0.6	0.37	0.42	0.21	0.32	0.13	0.21	0.08	1.32	0.23	2.51	0.38	0.49	0.06	0.28	0.01	0.17	0	0.1	0
GANet	ScifiKnot4	3.75	2.99	6.87	11.26	0.82	0.22	0.66	0.13	0.48	0.09	0.3	0.08	4.43	5.01	8.58	13.4	0.78	0.52	0.64	0.32	0.47	0.21	0.29	0.17	3.51	2.3	6.17	10.43	0.83	0.11	0.66	0.06	0.48	0.05	0.31	0.05
GANet	sleeping_room_1_11	0.96	2.2	3.66	9.65	0.45	0.2	0.16	0.08	0.04	0.06	0.02	0.05	1.64	3.97	5.79	13.14	0.44	0.35	0.23	0.18	0.11	0.12	0.06	0.09	0.71	1.55	2.46	7.99	0.46	0.15	0.13	0.04	0.02	0.04	0.01	0.03
GANet	living_room_3_5	2.95	1.76	7.26	5.97	0.5	0.35	0.31	0.21	0.2	0.13	0.15	0.07	3.26	2.55	7.55	6.93	0.59	0.49	0.41	0.31	0.26	0.2	0.18	0.13	2.67	1.05	6.99	4.97	0.41	0.23	0.23	0.12	0.15	0.07	0.13	0.02
GANet	living_room_3_9	0.6	0.32	1.7	0.66	0.35	0.13	0.13	0.03	0.03	0.01	0.01	0	0.93	0.5	2.8	1.07	0.46	0.28	0.21	0.08	0.06	0.03	0.03	0.01	0.44	0.23	0.64	0.3	0.29	0.06	0.09	0	0.01	0	0	0
GANet	mannequins_10	5.77	4.2	13.24	12.01	0.66	0.4	0.52	0.25	0.39	0.19	0.24	0.15	7.35	5.8	15.98	14.22	0.69	0.53	0.53	0.36	0.41	0.27	0.28	0.21	3.01	1.42	5.94	6.56	0.62	0.16	0.49	0.06	0.36	0.05	0.18	0.05
GANet	mannequins_12	5.16	1.4	8.4	4.25	0.64	0.25	0.57	0.13	0.48	0.1	0.38	0.08	4.89	2.49	8.68	5.95	0.55	0.41	0.46	0.24	0.38	0.18	0.32	0.16	5.42	0.33	8.12	1.07	0.73	0.09	0.67	0.02	0.58	0.01	0.44	0.01
GANet	mannequins_2	4.13	1.69	7.54	5.35	0.61	0.32	0.52	0.18	0.43	0.13	0.29	0.08	3.83	2.4	7.87	6.52	0.57	0.42	0.46	0.28	0.37	0.19	0.23	0.13	4.7	0.29	6.86	1.17	0.69	0.12	0.64	0	0.56	0	0.41	0
GANet	mannequins_5	1.62	0.8	3.56	2.39	0.56	0.26	0.39	0.14	0.22	0.07	0.12	0.05	1.77	1.12	3.84	2.89	0.55	0.37	0.4	0.21	0.24	0.11	0.13	0.08	1.39	0.33	3.11	1.39	0.58	0.1	0.37	0.03	0.19	0.01	0.09	0
GANet	mannequins_9	2.58	1.58	5.21	4.82	0.54	0.31	0.42	0.19	0.32	0.12	0.17	0.09	2.74	2.06	5.66	5.42	0.57	0.43	0.42	0.26	0.32	0.17	0.16	0.12	2.24	0.51	4.04	3.1	0.5	0.06	0.42	0.02	0.32	0.02	0.19	0.01
GANet	Minicubes4	3.88	3.11	6.7	6.2	0.61	0.44	0.46	0.34	0.37	0.27	0.3	0.23	3.67	3.24	6.58	6.39	0.61	0.49	0.46	0.36	0.36	0.29	0.28	0.24	4.26	2.86	6.92	5.82	0.6	0.35	0.46	0.28	0.39	0.24	0.34	0.21
GANet	Minicubes5	3.28	2.16	5.39	4.39	0.67	0.44	0.5	0.32	0.39	0.25	0.31	0.19	2.77	2.12	4.85	4.42	0.66	0.46	0.47	0.32	0.33	0.23	0.25	0.17	4.02	2.21	6.08	4.35	0.68	0.41	0.54	0.33	0.46	0.27	0.4	0.22
GANet	Minicubes9	4.12	1.2	6.31	3.83	0.73	0.26	0.61	0.14	0.52	0.1	0.41	0.07	3.23	1.85	5.95	4.95	0.65	0.39	0.52	0.24	0.41	0.17	0.28	0.12	5.26	0.38	6.75	1.44	0.83	0.1	0.74	0.02	0.66	0.01	0.57	0.01
GANet	moto3	0.9	0.48	1.83	0.94	0.42	0.21	0.24	0.09	0.13	0.05	0.04	0.01	1.28	0.77	2.52	1.35	0.53	0.38	0.34	0.19	0.21	0.11	0.08	0.03	0.6	0.26	0.96	0.34	0.32	0.07	0.16	0.01	0.06	0	0.01	0
GANet	music1_1	4	2.09	8.47	7.27	0.54	0.27	0.41	0.19	0.3	0.14	0.23	0.1	4.72	2.62	10.19	7.22	0.61	0.48	0.44	0.31	0.32	0.2	0.22	0.13	3.64	1.83	7.46	7.29	0.51	0.16	0.39	0.14	0.29	0.12	0.23	0.09
GANet	music1_6	3.5	3.45	7.95	10.2	0.64	0.38	0.5	0.24	0.36	0.17	0.22	0.14	4.49	4.71	9.6	11.2	0.68	0.56	0.52	0.37	0.39	0.26	0.28	0.21	2.04	1.58	4.5	8.51	0.59	0.11	0.46	0.05	0.31	0.03	0.13	0.03
GANet	music1_7	1.29	1.15	3.42	5.67	0.47	0.17	0.26	0.1	0.14	0.06	0.06	0.04	1.85	1.79	4.32	5.9	0.62	0.44	0.39	0.26	0.23	0.15	0.11	0.09	1.05	0.88	2.94	5.57	0.41	0.06	0.2	0.04	0.1	0.03	0.03	0.02
GANet	music1_9	6.7	1.62	11.97	5.14	0.72	0.29	0.53	0.17	0.42	0.13	0.37	0.09	7.29	3.23	14.6	7.69	0.66	0.5	0.51	0.33	0.35	0.24	0.28	0.19	6.53	1.18	11.13	4.16	0.74	0.24	0.54	0.13	0.44	0.1	0.4	0.06
GANet	nest5	7.05	5.27	22.38	20.75	0.77	0.49	0.61	0.35	0.42	0.27	0.31	0.2	8.25	7.49	27.83	26.15	0.78	0.63	0.63	0.48	0.46	0.38	0.35	0.29	5.63	2.61	13.18	11.31	0.76	0.33	0.58	0.2	0.37	0.14	0.26	0.1
GANet	office1	0.87	0.4	2.74	0.8	0.51	0.21	0.23	0.05	0.08	0.01	0.03	0	1.24	0.6	4.38	1.26	0.6	0.43	0.32	0.14	0.12	0.03	0.05	0.01	0.66	0.29	1.01	0.34	0.47	0.09	0.17	0	0.05	0	0.02	0
GANet	office12	5.53	1.51	9.69	5.43	0.79	0.22	0.67	0.13	0.48	0.1	0.3	0.08	7.66	3.15	11.72	8.52	0.82	0.39	0.71	0.25	0.6	0.2	0.44	0.16	4.41	0.64	8.43	2.6	0.77	0.13	0.65	0.07	0.41	0.05	0.23	0.03
GANet	office14	3.87	2.49	9.99	8.07	0.45	0.27	0.28	0.16	0.21	0.12	0.16	0.09	3.95	3.25	9.48	8.87	0.59	0.44	0.38	0.27	0.27	0.19	0.2	0.15	3.81	1.94	10.33	7.45	0.35	0.15	0.21	0.09	0.16	0.07	0.13	0.05
GANet	office2	0.74	0.32	1.21	0.52	0.5	0.14	0.21	0.03	0.05	0	0.02	0	1.1	0.52	1.79	0.88	0.61	0.36	0.37	0.11	0.13	0.02	0.06	0.01	0.61	0.25	0.91	0.3	0.46	0.07	0.15	0	0.02	0	0.01	0
GANet	sleeping_room_1_15	2.07	1.11	5.66	4.83	0.53	0.24	0.38	0.1	0.22	0.05	0.06	0.03	2.74	1.55	6.87	5.67	0.64	0.41	0.47	0.2	0.28	0.08	0.09	0.05	1.54	0.76	4.49	4.06	0.45	0.11	0.3	0.03	0.17	0.02	0.04	0.02
GANet	sleeping_room_1_3	0.78	0.66	1.69	2.12	0.5	0.37	0.16	0.1	0.04	0.03	0.02	0.02	1.38	1.31	3.01	3.86	0.61	0.51	0.33	0.23	0.1	0.09	0.07	0.07	0.58	0.45	0.89	1.01	0.47	0.33	0.1	0.05	0.02	0.01	0.01	0
GANet	sleeping_room_1_7	1.38	0.79	3.05	2.57	0.55	0.35	0.31	0.1	0.15	0.05	0.07	0.03	1.81	1.38	3.89	3.68	0.63	0.49	0.38	0.24	0.17	0.12	0.12	0.07	1.18	0.52	2.58	1.86	0.52	0.29	0.28	0.03	0.14	0.02	0.04	0.01
GANet	spaceStation2	11.26	7.32	19.05	14.28	0.82	0.8	0.73	0.72	0.69	0.64	0.65	0.44	4.87	4.47	8.7	8.06	0.68	0.63	0.45	0.42	0.35	0.35	0.34	0.33	14.51	8.76	22.55	16.57	0.89	0.88	0.86	0.86	0.86	0.78	0.81	0.49
GANet	stack_circles4	10.66	1.49	15.7	5.16	0.71	0.18	0.6	0.11	0.56	0.08	0.55	0.07	6.48	2.46	10.81	6.6	0.67	0.33	0.48	0.21	0.39	0.16	0.35	0.13	12.99	0.95	17.85	4.15	0.74	0.1	0.67	0.05	0.66	0.04	0.66	0.03
GANet	stack_circles9	13.65	1.5	22.12	4.01	0.79	0.27	0.71	0.17	0.67	0.12	0.65	0.09	6.65	2.68	11.5	5.71	0.65	0.42	0.53	0.28	0.43	0.22	0.4	0.18	18.05	0.75	26.72	2.39	0.88	0.18	0.83	0.09	0.82	0.06	0.8	0.04
GANet	time_travellers_10	25.67	3.06	36.95	11.94	0.78	0.24	0.64	0.12	0.55	0.08	0.52	0.06	20.47	8.07	32.34	19.81	0.78	0.5	0.61	0.32	0.48	0.21	0.44	0.18	27.8	1.02	38.67	6.37	0.77	0.14	0.65	0.04	0.57	0.02	0.55	0.02
GANet	time_travellers_13	9.84	1.43	12.98	5.04	0.79	0.16	0.72	0.1	0.65	0.08	0.62	0.07	7.02	2.59	10.64	6.47	0.65	0.34	0.54	0.21	0.48	0.17	0.45	0.15	11.78	0.63	14.37	3.76	0.89	0.04	0.84	0.02	0.76	0.02	0.73	0.02
GANet	time_travellers_15	16.37	3.21	26.78	12.07	0.77	0.23	0.65	0.11	0.57	0.1	0.56	0.09	10.64	7.11	18.17	18.18	0.68	0.39	0.53	0.27	0.43	0.23	0.41	0.21	19.68	0.96	30.66	6.25	0.82	0.13	0.71	0.02	0.65	0.02	0.65	0.02
GANet	time_travellers_2	6.88	1.55	10.09	6.26	0.68	0.18	0.59	0.11	0.53	0.08	0.5	0.07	5.53	2.48	9.41	6.92	0.6	0.36	0.47	0.22	0.4	0.16	0.36	0.14	7.86	0.88	10.56	5.74	0.73	0.05	0.68	0.03	0.62	0.03	0.6	0.02
GANet	time_travellers_20	5.66	0.85	7.68	3.27	0.79	0.12	0.7	0.07	0.62	0.06	0.55	0.05	4.74	1.69	7.19	4.48	0.67	0.28	0.57	0.18	0.5	0.14	0.42	0.12	6.13	0.43	7.92	2.42	0.85	0.03	0.76	0.02	0.69	0.02	0.61	0.01
GANet	time_travellers_24	30.27	2.92	45.05	11.81	0.84	0.2	0.74	0.13	0.64	0.1	0.54	0.07	21.23	7.93	33.87	19.64	0.81	0.46	0.68	0.33	0.56	0.27	0.47	0.21	33.35	1.22	48.27	7.48	0.86	0.11	0.76	0.06	0.67	0.04	0.57	0.03
GANet	time_travellers_25	10.48	2.11	16.78	7.69	0.7	0.19	0.58	0.12	0.5	0.09	0.49	0.08	9.27	3.7	16.33	9.56	0.66	0.38	0.52	0.24	0.43	0.19	0.4	0.16	11.28	1.06	17.07	6.16	0.73	0.07	0.61	0.04	0.55	0.03	0.55	0.03
GANet	time_travellers_3	13.19	2.09	19.32	8.32	0.77	0.2	0.66	0.13	0.61	0.1	0.58	0.08	9.59	3.29	15.88	9.48	0.71	0.36	0.58	0.25	0.49	0.18	0.45	0.15	15.87	1.2	21.53	7.34	0.81	0.08	0.72	0.04	0.69	0.03	0.69	0.03
GANet	twirls2	1.46	0.41	3.33	0.8	0.49	0.21	0.34	0.06	0.25	0.02	0.08	0.01	1.95	0.65	4.54	1.21	0.61	0.37	0.43	0.15	0.32	0.05	0.12	0.02	1.14	0.25	2.22	0.32	0.42	0.1	0.28	0	0.21	0	0.06	0
GANet	twirls3	1.2	0.34	2.38	0.68	0.5	0.14	0.34	0.05	0.24	0.02	0.05	0.01	1.7	0.61	3.46	1.12	0.6	0.34	0.4	0.13	0.3	0.06	0.11	0.03	0.95	0.2	1.58	0.26	0.44	0.05	0.31	0	0.2	0	0.02	0
GANet	voronoid_sphere6	5.33	5.02	10.98	14.47	0.7	0.28	0.5	0.22	0.34	0.18	0.24	0.16	6.05	6.47	11.7	15.93	0.71	0.41	0.52	0.31	0.4	0.26	0.29	0.22	4.11	2.59	9.64	11.6	0.68	0.07	0.45	0.06	0.26	0.06	0.16	0.06
GANet	voronoid_sphere9	4.41	2.59	7.22	6.01	0.52	0.33	0.45	0.27	0.43	0.23	0.38	0.19	3.71	2.97	6.61	6.49	0.46	0.37	0.39	0.31	0.36	0.26	0.32	0.22	8.46	0.4	10.07	1.07	0.85	0.12	0.84	0.02	0.83	0.01	0.76	0.01
GANet	walker4	6.13	1.22	7.67	3.23	0.8	0.22	0.73	0.14	0.68	0.11	0.6	0.09	5.13	2.49	7.26	4.87	0.69	0.38	0.56	0.29	0.51	0.24	0.46	0.2	6.76	0.43	7.92	1.48	0.87	0.11	0.84	0.04	0.79	0.03	0.69	0.02
GANet	windmills4	1.58	0.4	6.6	0.73	0.6	0.2	0.26	0.04	0.12	0.02	0.06	0.01	3.83	0.81	13.56	1.42	0.66	0.46	0.43	0.18	0.28	0.08	0.16	0.05	0.96	0.28	2.13	0.35	0.58	0.12	0.21	0	0.07	0	0.03	0
GANet	youngster_room10	2.14	1.23	5.92	4.48	0.47	0.26	0.26	0.13	0.16	0.07	0.1	0.05	3	2.11	7.16	5.81	0.64	0.47	0.41	0.25	0.24	0.15	0.14	0.1	1.73	0.81	5.22	3.68	0.38	0.16	0.19	0.07	0.12	0.03	0.08	0.02
GANet	youngster_room14	2.95	0.7	5.85	1.55	0.68	0.38	0.49	0.17	0.26	0.04	0.17	0.02	2.26	1.17	4.84	2.43	0.65	0.51	0.44	0.29	0.25	0.11	0.13	0.06	3.33	0.45	6.32	0.72	0.69	0.31	0.51	0.11	0.27	0.01	0.19	0
GANet	youngster_room4	1.13	0.49	2.41	1.07	0.64	0.25	0.29	0.07	0.1	0.03	0.04	0.02	1.52	0.79	3.49	1.66	0.64	0.38	0.36	0.17	0.17	0.08	0.07	0.04	0.94	0.34	1.63	0.57	0.64	0.18	0.26	0.01	0.06	0.01	0.02	0
GANet	youngster_room7	1.08	1	2.75	3.6	0.56	0.3	0.24	0.12	0.07	0.07	0.04	0.04	1.8	1.83	4.41	5.19	0.61	0.45	0.35	0.26	0.16	0.15	0.09	0.09	0.72	0.58	1.25	2.42	0.53	0.21	0.18	0.06	0.03	0.02	0.01	0.01
GANet	youngster_room9	1.26	0.57	4.35	2.43	0.42	0.2	0.17	0.07	0.06	0.03	0.04	0.02	2.17	1.29	6.24	4.36	0.49	0.39	0.3	0.18	0.14	0.08	0.08	0.05	0.87	0.27	3.22	0.56	0.39	0.12	0.11	0.03	0.03	0.01	0.02	0
GANet	dining_room_1_13	2.17	1.08	4.28	4.46	0.58	0.19	0.44	0.12	0.31	0.07	0.13	0.05	2.17	1.61	4.59	5.27	0.6	0.4	0.43	0.23	0.28	0.13	0.1	0.08	2.18	0.76	4.08	3.88	0.57	0.07	0.45	0.05	0.33	0.04	0.15	0.04
GANet	living_room_3_2	1.46	0.39	3.8	0.9	0.45	0.18	0.26	0.04	0.19	0.02	0.12	0.01	2.31	0.81	5.33	1.79	0.6	0.31	0.4	0.16	0.27	0.09	0.2	0.06	1.22	0.27	3.23	0.35	0.41	0.14	0.22	0	0.17	0	0.1	0
GANet	office_top4	1.33	0.39	3.86	0.62	0.65	0.19	0.24	0.05	0.08	0.01	0.05	0	1.77	0.61	5.23	0.98	0.65	0.41	0.39	0.15	0.12	0.04	0.08	0.01	1.13	0.3	3.05	0.34	0.65	0.1	0.17	0	0.06	0	0.04	0
GANet	sleeping_room_1_13	5.68	0.64	19.14	2.52	0.65	0.16	0.43	0.06	0.26	0.03	0.18	0.03	2.59	1.4	5.35	4.12	0.71	0.39	0.47	0.17	0.24	0.09	0.15	0.07	6.75	0.38	21.98	1.64	0.63	0.08	0.42	0.02	0.27	0.01	0.19	0.01
GANet	dining_room_1_5	2.11	1.61	5.27	5.44	0.58	0.38	0.39	0.2	0.2	0.12	0.11	0.09	2.54	2.34	5.81	6.65	0.6	0.53	0.42	0.32	0.26	0.19	0.15	0.13	1.69	0.9	4.69	3.92	0.55	0.25	0.35	0.08	0.14	0.06	0.08	0.04
GANet	dining_room_1_7	5.45	2.43	10.16	6.45	0.77	0.48	0.59	0.25	0.4	0.15	0.26	0.11	5.6	3.79	10.33	8.36	0.74	0.59	0.59	0.41	0.44	0.26	0.28	0.19	5.28	0.85	9.96	3	0.8	0.34	0.59	0.07	0.35	0.03	0.24	0.03
GANet	dining_room_1_9	1.2	0.74	2.79	1.81	0.45	0.33	0.24	0.14	0.11	0.06	0.06	0.03	1.54	1.09	3.27	2.42	0.52	0.46	0.33	0.24	0.17	0.1	0.09	0.06	0.83	0.35	2.15	0.63	0.38	0.18	0.14	0.02	0.04	0.01	0.03	0
GANet	floating_cubes1	4.01	0.91	9.43	2.78	0.76	0.34	0.59	0.16	0.55	0.09	0.43	0.06	3.92	1.55	8.12	4.14	0.76	0.44	0.57	0.28	0.51	0.18	0.44	0.12	4.08	0.43	10.32	0.77	0.75	0.26	0.6	0.07	0.57	0.02	0.42	0
GANet	fruit1	1	0.55	2.03	1.54	0.49	0.3	0.27	0.1	0.11	0.03	0.04	0.01	1.35	0.87	2.65	2.48	0.59	0.45	0.38	0.23	0.18	0.08	0.06	0.03	0.82	0.38	1.6	0.56	0.44	0.22	0.22	0.03	0.07	0.01	0.02	0
GANet	fruit6	2.31	1.91	6.39	7.73	0.36	0.18	0.26	0.11	0.21	0.08	0.18	0.07	4.13	3.64	9.46	10.24	0.65	0.46	0.47	0.28	0.35	0.2	0.28	0.15	1.57	1.21	4.6	6.44	0.24	0.07	0.18	0.04	0.15	0.04	0.13	0.03
GANet	fruit8	1.66	0.79	3.87	2.96	0.45	0.15	0.36	0.08	0.25	0.05	0.06	0.04	2.03	1.44	4.29	4.04	0.56	0.36	0.42	0.19	0.3	0.1	0.1	0.07	1.49	0.49	3.67	2.29	0.4	0.06	0.33	0.03	0.22	0.02	0.05	0.02
GANet	hacienda1	0.97	0.81	1.49	1.21	0.48	0.48	0.32	0.27	0.17	0.09	0.02	0.01	1.03	0.88	1.59	1.37	0.53	0.49	0.31	0.29	0.17	0.12	0.02	0.01	0.89	0.73	1.37	1	0.43	0.47	0.32	0.25	0.16	0.07	0.01	0
GANet	hacienda4	0.84	0.92	1.29	1.55	0.5	0.65	0.24	0.26	0.13	0.11	0.01	0.01	0.88	0.95	1.46	1.88	0.49	0.56	0.26	0.27	0.15	0.14	0.01	0.01	0.8	0.88	1.05	1.06	0.5	0.74	0.21	0.25	0.11	0.08	0	0
GANet	hacienda8	0.5	1.7	0.59	8.3	0.41	0.33	0.08	0.08	0	0.04	0	0.03	0.6	0.58	0.74	1.18	0.51	0.41	0.14	0.12	0	0.01	0	0.01	0.46	2.12	0.52	9.7	0.38	0.3	0.05	0.07	0	0.05	0	0.04
GANet	landscape1_5	1.83	3.37	7.49	14.42	0.43	0.27	0.21	0.14	0.11	0.1	0.06	0.08	3.26	5.08	11.11	18.01	0.48	0.4	0.27	0.21	0.15	0.15	0.11	0.12	0.9	2.26	3.51	11.51	0.39	0.19	0.16	0.09	0.08	0.07	0.02	0.06
GANet	landscape1_6	1.27	2.19	4.71	9.73	0.38	0.25	0.14	0.12	0.08	0.08	0.05	0.06	1.83	2.18	5.77	7.91	0.45	0.38	0.23	0.18	0.14	0.12	0.09	0.08	0.81	2.2	3.6	11.01	0.31	0.14	0.08	0.06	0.04	0.05	0.02	0.04
GANet	landscape3_2	2.18	2.28	5.87	6.03	0.47	0.41	0.27	0.28	0.22	0.23	0.2	0.21	2.29	2.52	7.21	7.57	0.43	0.46	0.24	0.27	0.17	0.19	0.14	0.15	2.1	2.11	4.67	4.63	0.49	0.38	0.3	0.28	0.26	0.27	0.25	0.25
GANet	landscape5_2	21.47	0.73	46.6	2.21	0.89	0.37	0.69	0.11	0.45	0.03	0.34	0.02	8.68	1.72	23.17	4.26	0.92	0.66	0.72	0.33	0.39	0.09	0.26	0.08	24.12	0.53	50.09	1.46	0.88	0.31	0.69	0.06	0.46	0.02	0.36	0.01
GANet	living_room_1_1	1.07	0.57	1.89	1.04	0.5	0.3	0.3	0.14	0.17	0.06	0.05	0.02	1.33	0.84	2.24	1.38	0.59	0.46	0.4	0.24	0.24	0.11	0.06	0.03	0.77	0.27	1.39	0.37	0.4	0.11	0.19	0.01	0.09	0	0.04	0
GANet	living_room_2_3	0.91	0.31	2.62	0.47	0.33	0.12	0.19	0.02	0.09	0.01	0.04	0	1.98	0.51	4.27	0.84	0.58	0.34	0.36	0.09	0.25	0.02	0.13	0.01	0.65	0.26	2.02	0.31	0.27	0.06	0.14	0	0.04	0	0.01	0
GANetLvl1	abstract_bowls_1	2.62	1.45	5.46	4.37	0.68	0.3	0.46	0.16	0.27	0.1	0.17	0.08	2.74	2.08	5.87	5.31	0.64	0.46	0.42	0.27	0.27	0.17	0.19	0.13	2.51	0.91	5.07	3.34	0.72	0.16	0.49	0.07	0.27	0.05	0.15	0.05
GANetLvl1	abstract_bowls_14	4.25	0.96	8.7	2.92	0.73	0.26	0.57	0.13	0.44	0.08	0.3	0.05	4.03	1.68	9.43	4.15	0.68	0.44	0.5	0.26	0.35	0.16	0.24	0.1	4.38	0.52	8.22	1.79	0.76	0.15	0.61	0.06	0.5	0.03	0.34	0.02
GANetLvl1	bones_3	3.61	3.06	8.62	8.12	0.61	0.44	0.36	0.26	0.23	0.17	0.15	0.13	4.56	4.16	10.08	9.65	0.62	0.55	0.41	0.36	0.27	0.24	0.2	0.18	1.53	0.66	3.82	2.48	0.6	0.18	0.25	0.04	0.15	0.03	0.06	0.03
GANetLvl1	bones_6	3.83	3.82	9.6	10.31	0.69	0.54	0.41	0.3	0.22	0.18	0.14	0.13	4.54	4.68	10.74	11.53	0.69	0.63	0.43	0.37	0.25	0.23	0.17	0.17	1.15	0.6	2.3	2.67	0.67	0.22	0.3	0.04	0.11	0.02	0.04	0.01
GANetLvl1	Chairs4	3.48	2.24	6	5.99	0.58	0.39	0.5	0.3	0.45	0.24	0.36	0.17	3.93	2.72	6.44	6.43	0.67	0.48	0.57	0.38	0.51	0.3	0.42	0.22	2.06	0.75	4.34	4.36	0.31	0.09	0.26	0.06	0.23	0.03	0.19	0.02
GANetLvl1	chess_8	1.91	0.95	3.84	3.54	0.49	0.2	0.31	0.1	0.23	0.07	0.17	0.05	2.14	1.5	4.17	4.59	0.54	0.32	0.37	0.17	0.26	0.12	0.19	0.09	1.69	0.42	3.5	2.07	0.45	0.08	0.26	0.02	0.2	0.02	0.15	0.01
GANetLvl1	childroom_1	0.99	0.53	2.2	1.55	0.5	0.16	0.23	0.06	0.07	0.04	0.04	0.02	1.35	0.87	2.87	2.29	0.55	0.31	0.32	0.14	0.13	0.08	0.07	0.05	0.74	0.29	1.56	0.65	0.46	0.06	0.16	0.01	0.03	0	0.02	0
GANetLvl1	childroom_12	2.16	1.24	5.23	4.35	0.55	0.21	0.3	0.11	0.13	0.07	0.12	0.06	2.21	1.7	5.27	4.85	0.64	0.34	0.36	0.18	0.13	0.11	0.1	0.09	2.11	0.79	5.19	3.79	0.46	0.09	0.23	0.04	0.14	0.03	0.13	0.03
GANetLvl1	childroom_2	3.07	2.73	8.89	9.28	0.65	0.31	0.47	0.18	0.3	0.13	0.11	0.1	3.82	3.85	10.52	11.43	0.65	0.47	0.48	0.29	0.31	0.19	0.15	0.14	2.37	1.69	7.05	6.7	0.64	0.16	0.45	0.08	0.29	0.07	0.08	0.06
GANetLvl1	childroom_4	0.8	0.72	2.44	3	0.33	0.18	0.17	0.07	0.04	0.04	0.02	0.03	0.97	1.09	2.67	3.84	0.4	0.3	0.24	0.12	0.07	0.06	0.03	0.04	0.63	0.35	2.19	1.75	0.26	0.06	0.11	0.02	0.02	0.01	0.01	0.01
GANetLvl1	childroom_6	1.15	0.69	2.64	2.21	0.51	0.22	0.22	0.08	0.1	0.05	0.06	0.03	1.4	1.03	3.14	2.99	0.52	0.35	0.26	0.14	0.13	0.09	0.08	0.06	0.94	0.39	2.12	1.17	0.5	0.12	0.18	0.03	0.07	0.01	0.04	0.01
GANetLvl1	childroom_9	2.07	2.52	7.47	9.42	0.28	0.19	0.15	0.11	0.1	0.09	0.08	0.08	2.06	2.54	5.99	8.59	0.45	0.36	0.25	0.19	0.16	0.12	0.11	0.1	2.07	2.52	8.2	9.86	0.18	0.09	0.09	0.07	0.07	0.07	0.06	0.06
GANetLvl1	cloth4	1.45	0.42	2.26	0.71	0.69	0.21	0.52	0.05	0.21	0.01	0.06	0	2	0.74	3	1.35	0.74	0.47	0.59	0.2	0.35	0.04	0.11	0.02	1.31	0.33	2.02	0.4	0.68	0.15	0.5	0.01	0.18	0	0.05	0
GANetLvl1	cloth6	1.68	0.56	3	1.59	0.7	0.29	0.49	0.08	0.26	0.03	0.09	0.01	2.12	0.91	3.94	2.22	0.71	0.45	0.54	0.21	0.33	0.08	0.14	0.03	1.46	0.39	2.42	1.18	0.69	0.21	0.47	0.02	0.23	0	0.06	0
GANetLvl1	cloth7	6.78	1.21	12.11	4.1	0.75	0.31	0.58	0.12	0.47	0.06	0.42	0.05	3.58	1.8	6.53	4.97	0.67	0.45	0.45	0.21	0.28	0.11	0.24	0.09	9.48	0.71	15.32	3.18	0.82	0.19	0.69	0.04	0.62	0.02	0.57	0.02
GANetLvl1	coral6	2.38	1.35	4.03	4.62	0.69	0.2	0.52	0.13	0.34	0.09	0.19	0.07	3.38	2.32	5.4	5.85	0.74	0.42	0.57	0.28	0.44	0.19	0.32	0.13	1.76	0.74	2.87	3.65	0.66	0.07	0.49	0.04	0.28	0.03	0.11	0.03
GANetLvl1	dining_room_1_1	5.01	4.54	11.52	11.1	0.61	0.52	0.44	0.35	0.27	0.24	0.21	0.18	6.88	6.52	13.84	13.56	0.69	0.65	0.53	0.48	0.38	0.35	0.29	0.27	2.35	1.71	7.01	6.07	0.49	0.35	0.3	0.16	0.12	0.09	0.09	0.06
GANetLvl1	office_top5	0.98	0.55	1.89	1.45	0.54	0.19	0.23	0.07	0.1	0.04	0.05	0.02	1.43	1.02	2.71	2.38	0.56	0.38	0.32	0.19	0.19	0.11	0.1	0.07	0.75	0.29	1.24	0.43	0.52	0.1	0.18	0.01	0.05	0	0.02	0
GANetLvl1	park1	0.6	0.44	0.99	0.89	0.39	0.21	0.13	0.09	0.04	0.03	0.01	0.01	0.76	0.66	1.29	1.21	0.44	0.36	0.22	0.17	0.08	0.07	0.02	0.02	0.43	0.2	0.5	0.26	0.32	0.04	0.03	0	0	0	0	0
GANetLvl1	park10	1.43	1.56	3.47	4.22	0.46	0.36	0.23	0.21	0.14	0.14	0.09	0.1	2	2.29	4.31	5.23	0.56	0.54	0.34	0.32	0.22	0.22	0.14	0.15	0.38	0.23	0.53	0.69	0.28	0.05	0.03	0.01	0	0	0	0
GANetLvl1	park6	1.98	2.13	5.35	7.63	0.55	0.27	0.28	0.15	0.15	0.11	0.09	0.09	4.11	4.42	8.64	10.72	0.66	0.52	0.45	0.35	0.31	0.26	0.21	0.2	0.9	0.96	2.31	5.42	0.49	0.14	0.19	0.04	0.06	0.03	0.02	0.03
GANetLvl1	person1_1	13.31	1.29	21.84	4.61	0.7	0.15	0.53	0.07	0.48	0.06	0.46	0.05	9.36	3.53	15.19	8.33	0.58	0.35	0.44	0.21	0.4	0.18	0.38	0.16	14.56	0.58	23.56	2.46	0.73	0.09	0.56	0.02	0.5	0.02	0.49	0.02
GANetLvl1	person1_3	2.12	2.32	7.5	8.39	0.43	0.31	0.28	0.2	0.17	0.12	0.1	0.08	4.34	4.2	11.97	12.05	0.6	0.46	0.44	0.3	0.31	0.21	0.2	0.15	0.94	1.31	3.14	5.51	0.34	0.23	0.2	0.14	0.1	0.07	0.04	0.04
GANetLvl1	person1_8	8.42	0.83	16.89	2.49	0.71	0.25	0.47	0.09	0.38	0.06	0.36	0.05	5.49	2.19	9.02	4.9	0.6	0.33	0.48	0.25	0.4	0.19	0.37	0.16	9.13	0.5	18.3	1.36	0.73	0.23	0.47	0.06	0.38	0.02	0.36	0.02
GANetLvl1	person2_5	2.77	1.03	6.14	4.31	0.56	0.16	0.39	0.08	0.26	0.05	0.18	0.04	2.66	1.56	5.83	5.19	0.6	0.34	0.41	0.17	0.26	0.1	0.17	0.07	2.83	0.74	6.31	3.73	0.55	0.07	0.38	0.03	0.26	0.03	0.18	0.03
GANetLvl1	person3_10	2.48	1.71	6.35	7.03	0.56	0.19	0.38	0.1	0.24	0.07	0.11	0.05	4.31	3.1	9.5	9.67	0.68	0.43	0.47	0.24	0.3	0.14	0.21	0.09	1.81	1.2	4.69	5.77	0.52	0.1	0.35	0.05	0.22	0.04	0.08	0.04
GANetLvl1	person3_3	3.67	1.53	8.43	6.88	0.62	0.18	0.46	0.1	0.28	0.06	0.15	0.05	5.09	2.61	10.24	7.63	0.72	0.38	0.53	0.21	0.36	0.14	0.24	0.11	3.2	1.17	7.73	6.6	0.59	0.12	0.44	0.06	0.26	0.03	0.12	0.03
GANetLvl1	person3_4	3.41	1.46	8.61	5.33	0.5	0.21	0.3	0.11	0.18	0.08	0.15	0.06	4.96	2.33	10.94	6.56	0.55	0.36	0.33	0.2	0.23	0.14	0.2	0.11	2.53	0.97	6.95	4.48	0.46	0.12	0.28	0.06	0.16	0.04	0.12	0.03
GANetLvl1	plant_vintage12	3.02	1.78	5.95	4.74	0.57	0.37	0.4	0.22	0.29	0.15	0.22	0.1	3.16	2.58	6.25	5.8	0.59	0.5	0.41	0.33	0.29	0.22	0.22	0.16	2.77	0.37	5.37	1.65	0.55	0.13	0.4	0.03	0.29	0.01	0.21	0.01
GANetLvl1	plant_vintage14	1.13	0.43	2.05	1	0.62	0.2	0.29	0.06	0.13	0.02	0.05	0.01	1.66	0.85	2.93	1.78	0.64	0.45	0.42	0.2	0.25	0.08	0.09	0.03	0.92	0.26	1.55	0.32	0.61	0.1	0.24	0	0.08	0	0.03	0
GANetLvl1	plant_vintage15	1.04	0.45	2.23	1.05	0.52	0.19	0.26	0.07	0.12	0.03	0.04	0.01	1.56	0.89	3.15	1.84	0.61	0.44	0.41	0.21	0.23	0.09	0.07	0.04	0.81	0.26	1.67	0.31	0.49	0.08	0.19	0	0.08	0	0.02	0
GANetLvl1	plant_vintage2	1	0.48	2	1.44	0.55	0.18	0.29	0.06	0.09	0.02	0.05	0.02	1.33	0.83	2.76	2.15	0.64	0.38	0.4	0.14	0.14	0.05	0.07	0.04	0.81	0.28	1.4	0.8	0.5	0.07	0.23	0.01	0.07	0.01	0.03	0
GANetLvl1	plant_vintage4	0.78	0.44	1.31	0.81	0.44	0.22	0.21	0.09	0.1	0.03	0.02	0.01	1.16	0.77	1.83	1.26	0.56	0.44	0.35	0.22	0.19	0.09	0.06	0.02	0.55	0.24	0.86	0.31	0.36	0.08	0.13	0	0.05	0	0.01	0
GANetLvl1	plant_vintage7	1.33	1.07	2.82	2.76	0.47	0.3	0.27	0.15	0.13	0.1	0.09	0.08	1.87	1.75	3.67	3.72	0.54	0.45	0.35	0.27	0.21	0.18	0.15	0.14	0.67	0.26	1.19	0.39	0.39	0.13	0.19	0.01	0.04	0	0.02	0
GANetLvl1	roundntwist4	1.66	0.67	2.16	1.03	0.73	0.39	0.57	0.21	0.38	0.08	0.05	0.01	1.36	0.83	1.93	1.25	0.62	0.45	0.45	0.3	0.29	0.13	0.04	0.01	2.11	0.42	2.46	0.54	0.88	0.3	0.76	0.07	0.51	0	0.08	0
GANetLvl1	ScifiKnot1	1.68	0.54	3.2	1.37	0.52	0.19	0.32	0.09	0.23	0.05	0.14	0.03	2.28	1.06	4.1	2.18	0.61	0.38	0.42	0.21	0.32	0.14	0.21	0.08	1.31	0.23	2.5	0.33	0.47	0.07	0.26	0.01	0.17	0	0.1	0
GANetLvl1	ScifiKnot4	3.67	2.19	6.35	8.13	0.8	0.24	0.65	0.13	0.47	0.09	0.3	0.08	4.89	3.87	9.27	10.12	0.77	0.54	0.63	0.34	0.49	0.23	0.32	0.17	3.25	1.61	4.98	7.32	0.81	0.13	0.66	0.06	0.47	0.05	0.3	0.04
GANetLvl1	sleeping_room_1_11	0.89	1.88	3.23	8.22	0.43	0.19	0.15	0.08	0.05	0.06	0.02	0.05	1.48	3.52	4.96	11.36	0.47	0.35	0.25	0.17	0.12	0.11	0.05	0.1	0.68	1.28	2.29	6.7	0.42	0.13	0.12	0.04	0.03	0.04	0.01	0.03
GANetLvl1	living_room_3_5	2.59	1.74	6.59	5.38	0.48	0.37	0.3	0.22	0.18	0.13	0.13	0.08	2.97	2.61	6.95	6.67	0.58	0.51	0.39	0.33	0.24	0.21	0.16	0.13	2.25	0.97	6.25	3.87	0.39	0.25	0.22	0.12	0.13	0.07	0.1	0.03
GANetLvl1	living_room_3_9	0.61	0.33	1.08	0.81	0.37	0.13	0.16	0.04	0.04	0.01	0.01	0.01	0.87	0.56	1.58	1.34	0.48	0.29	0.24	0.1	0.08	0.04	0.04	0.02	0.47	0.21	0.71	0.29	0.31	0.05	0.12	0	0.02	0	0	0
GANetLvl1	mannequins_10	5.97	4.25	13.65	11.72	0.65	0.4	0.51	0.27	0.39	0.21	0.25	0.16	7.7	5.93	16.53	14.25	0.68	0.55	0.53	0.38	0.42	0.29	0.29	0.21	2.94	1.33	5.87	4.78	0.6	0.15	0.47	0.08	0.34	0.07	0.17	0.06
GANetLvl1	mannequins_12	5.88	1.46	9.57	4.26	0.65	0.25	0.59	0.13	0.5	0.1	0.43	0.09	5.24	2.49	9.18	5.83	0.55	0.4	0.47	0.24	0.39	0.18	0.34	0.16	6.5	0.45	9.94	1.63	0.75	0.1	0.71	0.02	0.61	0.02	0.53	0.02
GANetLvl1	mannequins_2	4.29	1.68	7.7	5.33	0.61	0.32	0.52	0.19	0.43	0.13	0.31	0.08	3.94	2.39	7.86	6.48	0.57	0.43	0.47	0.28	0.37	0.19	0.24	0.13	4.97	0.3	7.36	1.31	0.68	0.1	0.64	0	0.54	0	0.43	0
GANetLvl1	mannequins_5	1.71	0.89	3.35	2.38	0.55	0.28	0.39	0.14	0.25	0.08	0.13	0.06	1.92	1.26	3.86	2.9	0.55	0.39	0.4	0.23	0.27	0.13	0.15	0.09	1.39	0.35	2.41	1.29	0.56	0.12	0.36	0.03	0.21	0.01	0.11	0.01
GANetLvl1	mannequins_9	2.73	1.63	5.3	4.57	0.54	0.32	0.42	0.2	0.33	0.13	0.19	0.09	2.86	2.08	5.64	5.01	0.56	0.43	0.43	0.27	0.33	0.17	0.18	0.12	2.45	0.64	4.44	3.38	0.48	0.08	0.4	0.03	0.33	0.03	0.22	0.02
GANetLvl1	Minicubes4	3.91	3.16	6.71	6.13	0.65	0.45	0.47	0.35	0.37	0.29	0.31	0.24	3.75	3.26	6.59	6.25	0.65	0.5	0.48	0.38	0.37	0.3	0.29	0.25	4.22	2.97	6.94	5.9	0.65	0.36	0.46	0.3	0.36	0.26	0.34	0.22
GANetLvl1	Minicubes5	3.61	2.74	6.35	5.5	0.68	0.45	0.5	0.34	0.39	0.28	0.32	0.22	3.06	2.4	6.06	5	0.67	0.47	0.47	0.34	0.34	0.26	0.26	0.19	4.4	3.22	6.75	6.15	0.69	0.42	0.55	0.35	0.45	0.31	0.4	0.26
GANetLvl1	Minicubes9	4.76	1.29	8.24	3.94	0.74	0.27	0.64	0.16	0.54	0.11	0.42	0.08	3.39	1.97	6	5.02	0.67	0.42	0.55	0.26	0.43	0.18	0.3	0.13	6.51	0.42	10.43	1.81	0.84	0.07	0.77	0.02	0.67	0.02	0.58	0.01
GANetLvl1	moto3	0.91	0.52	1.82	0.97	0.42	0.27	0.25	0.1	0.13	0.05	0.04	0.01	1.28	0.8	2.5	1.39	0.53	0.42	0.34	0.2	0.21	0.11	0.08	0.03	0.61	0.29	0.98	0.4	0.33	0.15	0.17	0.01	0.06	0	0.01	0
GANetLvl1	music1_1	3.67	2.14	8.01	6.14	0.58	0.27	0.45	0.21	0.29	0.16	0.19	0.12	4.44	2.71	9.49	6.88	0.64	0.46	0.48	0.32	0.33	0.22	0.21	0.14	3.29	1.85	7.16	5.74	0.55	0.18	0.43	0.15	0.27	0.13	0.18	0.11
GANetLvl1	music1_6	3.46	3.3	7.88	9.8	0.66	0.39	0.51	0.25	0.36	0.17	0.22	0.13	4.44	4.56	9.48	10.97	0.69	0.57	0.54	0.38	0.41	0.26	0.28	0.2	2.01	1.44	4.59	7.74	0.6	0.12	0.45	0.05	0.29	0.04	0.13	0.03
GANetLvl1	music1_7	1.32	1.1	3.49	4.3	0.5	0.19	0.25	0.11	0.13	0.08	0.06	0.06	2.04	1.8	4.85	5.39	0.61	0.45	0.39	0.26	0.24	0.16	0.13	0.1	1.01	0.81	2.71	3.75	0.46	0.08	0.19	0.05	0.09	0.04	0.03	0.04
GANetLvl1	music1_9	7.68	1.53	14.1	4.54	0.74	0.28	0.57	0.17	0.46	0.13	0.38	0.09	7.64	2.98	16.48	7.08	0.64	0.48	0.5	0.31	0.37	0.24	0.28	0.19	7.69	1.12	13.36	3.52	0.76	0.23	0.59	0.13	0.49	0.11	0.41	0.07
GANetLvl1	nest5	6.51	4.91	23	19.84	0.77	0.48	0.6	0.35	0.44	0.27	0.3	0.21	7.71	7.13	28.5	25.23	0.78	0.64	0.62	0.49	0.48	0.39	0.34	0.29	5.07	2.25	13.8	10.18	0.75	0.3	0.58	0.18	0.4	0.14	0.25	0.11
GANetLvl1	office1	1.09	0.41	4.11	0.87	0.51	0.21	0.26	0.06	0.12	0.02	0.04	0.01	1.63	0.66	6.66	1.39	0.58	0.44	0.33	0.17	0.14	0.05	0.07	0.02	0.79	0.27	1.27	0.32	0.47	0.08	0.22	0	0.1	0	0.02	0
GANetLvl1	office12	5.84	1.19	10.22	4.08	0.78	0.17	0.68	0.11	0.48	0.08	0.31	0.07	8.06	2.46	12.23	6.4	0.82	0.33	0.73	0.23	0.6	0.17	0.44	0.14	4.67	0.52	8.97	1.96	0.75	0.09	0.66	0.05	0.42	0.04	0.23	0.03
GANetLvl1	office14	3.66	2.45	9.57	7.99	0.44	0.27	0.29	0.16	0.2	0.12	0.15	0.1	3.89	3.36	9.41	9.16	0.58	0.45	0.38	0.28	0.25	0.2	0.18	0.15	3.51	1.8	9.67	7.05	0.34	0.15	0.22	0.08	0.16	0.06	0.13	0.06
GANetLvl1	office2	0.74	0.3	1.25	0.56	0.45	0.14	0.2	0.03	0.07	0.01	0.02	0	1.13	0.57	1.89	1	0.58	0.38	0.36	0.12	0.16	0.03	0.06	0.01	0.6	0.2	0.92	0.27	0.4	0.05	0.14	0	0.04	0	0.01	0
GANetLvl1	sleeping_room_1_15	2.6	1.02	6.82	4.29	0.55	0.22	0.4	0.1	0.26	0.05	0.1	0.03	3.21	1.49	7.55	5.25	0.66	0.38	0.51	0.19	0.33	0.08	0.13	0.05	2.12	0.64	6.19	3.33	0.47	0.09	0.32	0.03	0.2	0.02	0.07	0.02
GANetLvl1	sleeping_room_1_3	0.9	0.73	1.78	1.8	0.6	0.41	0.22	0.12	0.05	0.04	0.03	0.03	1.48	1.29	2.99	3.2	0.64	0.52	0.38	0.25	0.12	0.09	0.08	0.08	0.71	0.54	1.11	0.96	0.59	0.37	0.17	0.08	0.02	0.02	0.01	0.01
GANetLvl1	sleeping_room_1_7	1.48	0.88	3.17	2.61	0.56	0.34	0.31	0.11	0.16	0.06	0.08	0.04	1.96	1.5	4.02	3.81	0.64	0.5	0.38	0.25	0.2	0.13	0.13	0.09	1.27	0.59	2.7	1.82	0.52	0.27	0.28	0.05	0.15	0.03	0.06	0.02
GANetLvl1	spaceStation2	11.64	5.71	20	9.25	0.81	0.79	0.72	0.71	0.69	0.68	0.66	0.42	4.74	4.52	8.43	8.17	0.64	0.6	0.44	0.42	0.36	0.36	0.34	0.33	15.15	6.32	23.81	9.75	0.89	0.89	0.87	0.86	0.86	0.84	0.82	0.47
GANetLvl1	stack_circles4	11.2	1.53	17.27	5.06	0.73	0.24	0.61	0.12	0.56	0.08	0.54	0.07	6.6	2.3	11.1	6.15	0.69	0.37	0.52	0.22	0.4	0.15	0.35	0.12	13.76	1.1	19.89	4.33	0.74	0.17	0.67	0.06	0.65	0.04	0.64	0.04
GANetLvl1	stack_circles9	12.62	1.62	19.65	4.25	0.8	0.28	0.72	0.17	0.67	0.12	0.64	0.1	7.37	2.85	13.54	5.94	0.65	0.43	0.53	0.29	0.45	0.22	0.4	0.19	15.93	0.84	22.66	2.68	0.89	0.19	0.84	0.1	0.81	0.06	0.8	0.04
GANetLvl1	time_travellers_10	28.12	3.18	39.57	11.9	0.78	0.26	0.64	0.13	0.57	0.09	0.55	0.07	20.92	8.3	32.69	19.74	0.76	0.51	0.6	0.34	0.49	0.24	0.46	0.2	31.06	1.1	42.05	6.38	0.78	0.16	0.66	0.04	0.6	0.03	0.59	0.02
GANetLvl1	time_travellers_13	10.05	1.43	13.38	4.51	0.79	0.19	0.71	0.11	0.65	0.09	0.62	0.08	7.02	2.59	10.77	6.29	0.66	0.35	0.54	0.21	0.47	0.17	0.44	0.15	12.12	0.63	14.91	2.67	0.89	0.08	0.83	0.03	0.77	0.03	0.74	0.02
GANetLvl1	time_travellers_15	16.44	2.66	26.01	9.17	0.75	0.21	0.63	0.12	0.57	0.1	0.56	0.09	10.42	5.84	17.44	13.78	0.69	0.41	0.53	0.28	0.43	0.24	0.4	0.22	19.92	0.82	29.86	4.79	0.78	0.09	0.69	0.03	0.65	0.02	0.65	0.02
GANetLvl1	time_travellers_2	7.08	1.59	10.56	5.7	0.67	0.22	0.59	0.11	0.53	0.09	0.5	0.08	5.73	2.53	9.83	6.8	0.6	0.38	0.48	0.22	0.41	0.16	0.36	0.14	8.06	0.91	11.06	4.75	0.72	0.11	0.67	0.03	0.63	0.03	0.6	0.03
GANetLvl1	time_travellers_20	6.48	0.89	9.5	3.13	0.82	0.14	0.74	0.07	0.66	0.06	0.57	0.05	5.27	1.75	8.13	4.51	0.68	0.3	0.58	0.18	0.52	0.14	0.44	0.12	7.1	0.45	10.13	2.1	0.88	0.05	0.82	0.02	0.73	0.02	0.63	0.02
GANetLvl1	time_travellers_24	30.93	2.78	44.67	10.71	0.84	0.24	0.74	0.15	0.65	0.1	0.59	0.08	24.1	7.51	37.25	17.87	0.82	0.52	0.7	0.37	0.58	0.28	0.51	0.22	33.26	1.17	46.93	6.72	0.84	0.14	0.75	0.07	0.67	0.04	0.61	0.03
GANetLvl1	time_travellers_25	11.12	2.19	17.87	7.49	0.68	0.23	0.56	0.12	0.5	0.1	0.49	0.09	10.05	3.85	17.52	9.6	0.66	0.41	0.52	0.25	0.43	0.19	0.41	0.17	11.82	1.09	18.11	5.68	0.69	0.11	0.59	0.04	0.55	0.03	0.55	0.03
GANetLvl1	time_travellers_3	13.44	2.11	19.65	7.05	0.74	0.26	0.66	0.15	0.61	0.11	0.58	0.09	10.06	3.46	16.66	8.74	0.7	0.41	0.58	0.28	0.49	0.2	0.45	0.17	15.96	1.11	21.62	5.46	0.78	0.14	0.71	0.05	0.69	0.04	0.69	0.04
GANetLvl1	twirls2	1.37	0.44	2.63	0.89	0.5	0.22	0.33	0.07	0.26	0.03	0.09	0.01	1.8	0.71	3.46	1.35	0.62	0.38	0.43	0.17	0.33	0.07	0.13	0.03	1.1	0.27	1.91	0.34	0.43	0.12	0.27	0.01	0.21	0	0.06	0
GANetLvl1	twirls3	1.15	0.4	1.83	0.82	0.5	0.18	0.35	0.06	0.23	0.03	0.05	0.01	1.57	0.72	2.47	1.35	0.61	0.37	0.42	0.16	0.31	0.08	0.11	0.04	0.94	0.24	1.4	0.33	0.45	0.09	0.31	0.01	0.19	0	0.01	0
GANetLvl1	voronoid_sphere6	5.17	4.48	10.81	11.99	0.63	0.32	0.45	0.23	0.32	0.19	0.23	0.17	5.98	5.93	11.54	13.55	0.63	0.44	0.48	0.32	0.38	0.27	0.29	0.24	3.82	2.05	9.45	8.77	0.64	0.13	0.38	0.08	0.21	0.07	0.15	0.06
GANetLvl1	voronoid_sphere9	5.48	2.68	10.42	5.82	0.54	0.35	0.46	0.28	0.44	0.24	0.39	0.2	4.15	3.06	7.88	6.28	0.49	0.39	0.4	0.32	0.37	0.28	0.33	0.23	13.22	0.48	19.47	1.22	0.85	0.16	0.84	0.04	0.83	0.02	0.75	0.01
GANetLvl1	walker4	6.11	1.34	7.77	3.36	0.79	0.27	0.73	0.16	0.67	0.12	0.6	0.1	5.18	2.66	7.49	5.06	0.66	0.41	0.56	0.31	0.51	0.27	0.46	0.22	6.69	0.53	7.94	1.56	0.87	0.18	0.83	0.06	0.77	0.04	0.68	0.03
GANetLvl1	windmills4	1.22	0.47	2.32	1.02	0.63	0.26	0.29	0.05	0.12	0.03	0.06	0.02	1.97	1.09	3.38	2.04	0.66	0.55	0.43	0.22	0.28	0.12	0.17	0.08	1.02	0.3	1.92	0.41	0.63	0.17	0.25	0.01	0.08	0	0.03	0
GANetLvl1	youngster_room10	2.51	1.16	7.58	4.14	0.42	0.25	0.26	0.13	0.17	0.07	0.1	0.05	3.18	1.97	7.58	5.38	0.66	0.45	0.42	0.26	0.27	0.14	0.14	0.1	2.19	0.77	7.59	3.39	0.31	0.15	0.18	0.07	0.12	0.04	0.08	0.03
GANetLvl1	youngster_room14	4.91	1	11.8	3.33	0.68	0.38	0.5	0.18	0.31	0.07	0.22	0.04	5.25	1.57	13.76	4.13	0.65	0.5	0.45	0.3	0.29	0.15	0.19	0.09	4.72	0.69	10.61	2.81	0.69	0.31	0.52	0.12	0.32	0.02	0.23	0.01
GANetLvl1	youngster_room4	1.24	0.56	2.98	1.47	0.63	0.22	0.33	0.08	0.12	0.04	0.05	0.02	1.82	0.99	4.63	2.3	0.64	0.41	0.4	0.2	0.2	0.09	0.09	0.06	0.96	0.34	1.62	0.78	0.63	0.13	0.29	0.02	0.07	0.01	0.03	0.01
GANetLvl1	youngster_room7	1.24	0.97	3.08	3.3	0.6	0.28	0.3	0.13	0.09	0.08	0.05	0.04	1.84	1.83	4.32	5.03	0.63	0.46	0.38	0.26	0.18	0.16	0.1	0.1	0.93	0.53	2.19	1.89	0.58	0.19	0.26	0.07	0.04	0.03	0.02	0.02
GANetLvl1	youngster_room9	1.17	0.5	3.73	1.97	0.47	0.2	0.18	0.07	0.06	0.03	0.04	0.01	1.71	1.11	4.62	3.55	0.53	0.4	0.3	0.18	0.14	0.08	0.07	0.05	0.94	0.24	3.28	0.38	0.44	0.11	0.12	0.02	0.03	0	0.02	0
GANetLvl1	dining_room_1_13	2.55	1.19	4.93	4.52	0.59	0.21	0.45	0.12	0.35	0.08	0.18	0.06	2.26	1.7	4.92	5.03	0.6	0.41	0.43	0.23	0.3	0.13	0.11	0.08	2.73	0.89	4.93	4.18	0.59	0.1	0.46	0.05	0.38	0.05	0.22	0.05
GANetLvl1	living_room_3_2	1.46	0.44	3.31	1.02	0.44	0.18	0.26	0.05	0.18	0.03	0.11	0.02	2.7	0.98	5.47	2.03	0.62	0.36	0.44	0.2	0.3	0.12	0.22	0.08	1.1	0.29	2.36	0.4	0.39	0.13	0.21	0.01	0.15	0	0.07	0
GANetLvl1	office_top4	1.01	0.39	1.59	0.69	0.65	0.17	0.29	0.06	0.09	0.02	0.04	0.01	1.34	0.66	2.14	1.12	0.65	0.39	0.44	0.16	0.14	0.06	0.09	0.02	0.86	0.27	1.27	0.34	0.65	0.07	0.23	0.01	0.06	0	0.02	0
GANetLvl1	sleeping_room_1_13	5.42	0.78	14.73	3.23	0.67	0.18	0.44	0.06	0.28	0.04	0.19	0.03	4.12	1.61	10.63	5.28	0.71	0.39	0.5	0.18	0.28	0.1	0.18	0.08	5.87	0.5	15.9	2.11	0.66	0.11	0.42	0.02	0.28	0.02	0.2	0.02
GANetLvl1	dining_room_1_5	1.92	1.68	4.31	4.94	0.59	0.41	0.38	0.21	0.21	0.13	0.12	0.09	2.5	2.28	5.46	5.65	0.62	0.54	0.44	0.33	0.27	0.19	0.16	0.13	1.36	1.1	2.78	4.14	0.56	0.29	0.32	0.09	0.15	0.06	0.08	0.05
GANetLvl1	dining_room_1_7	5.74	2.57	10.63	6.67	0.77	0.47	0.59	0.25	0.41	0.17	0.27	0.13	5.8	3.94	10.64	8.52	0.75	0.62	0.59	0.42	0.44	0.27	0.29	0.2	5.68	0.99	10.62	3.49	0.79	0.29	0.58	0.07	0.38	0.05	0.25	0.04
GANetLvl1	dining_room_1_9	1.24	0.87	2.78	2.31	0.48	0.36	0.25	0.15	0.11	0.07	0.07	0.04	1.58	1.24	3.26	3.04	0.54	0.49	0.35	0.25	0.17	0.11	0.09	0.07	0.87	0.45	2.11	1.03	0.41	0.22	0.15	0.03	0.05	0.01	0.04	0.01
GANetLvl1	floating_cubes1	3.63	1.02	5.03	2.24	0.75	0.37	0.59	0.18	0.57	0.11	0.45	0.07	3.84	1.72	5.58	3.25	0.76	0.48	0.57	0.31	0.54	0.23	0.47	0.16	3.47	0.49	4.57	0.89	0.74	0.29	0.6	0.08	0.59	0.02	0.43	0.01
GANetLvl1	fruit1	1.13	0.62	1.87	1.15	0.6	0.42	0.33	0.12	0.15	0.05	0.05	0.02	1.38	0.91	2.31	1.69	0.61	0.48	0.41	0.25	0.2	0.09	0.07	0.04	0.99	0.47	1.58	0.71	0.59	0.38	0.28	0.06	0.12	0.02	0.04	0.01
GANetLvl1	fruit6	2	1.71	4.49	6.23	0.37	0.21	0.27	0.12	0.21	0.09	0.18	0.07	3.44	3.26	6.5	8.35	0.65	0.48	0.49	0.3	0.36	0.21	0.3	0.16	1.41	1.08	3.35	5.13	0.25	0.1	0.17	0.05	0.15	0.04	0.13	0.04
GANetLvl1	fruit8	1.78	0.89	3.99	3.24	0.46	0.17	0.37	0.09	0.25	0.06	0.08	0.04	2.39	1.6	4.9	4.36	0.59	0.39	0.45	0.22	0.35	0.12	0.13	0.08	1.5	0.56	3.49	2.56	0.39	0.06	0.34	0.03	0.21	0.03	0.06	0.03
GANetLvl1	hacienda1	0.97	0.81	1.49	1.22	0.5	0.49	0.31	0.26	0.17	0.1	0.02	0.01	1.06	0.9	1.61	1.4	0.57	0.51	0.31	0.29	0.18	0.12	0.02	0.02	0.88	0.7	1.35	0.97	0.43	0.47	0.3	0.24	0.16	0.07	0.01	0
GANetLvl1	hacienda4	0.86	0.85	1.53	1.46	0.54	0.58	0.23	0.24	0.13	0.09	0.01	0.01	0.93	0.91	1.87	1.79	0.5	0.52	0.27	0.27	0.15	0.13	0.01	0.01	0.78	0.77	1	0.94	0.59	0.66	0.19	0.2	0.11	0.05	0	0
GANetLvl1	hacienda8	0.71	3.35	1.79	12.33	0.43	0.35	0.16	0.18	0.04	0.1	0.02	0.08	0.82	0.84	2.51	2.77	0.5	0.41	0.19	0.17	0.03	0.04	0.02	0.02	0.67	4.29	1.43	14.35	0.4	0.32	0.14	0.18	0.04	0.13	0.02	0.1
GANetLvl1	landscape1_5	2.7	5.01	11.41	19.11	0.41	0.29	0.19	0.15	0.11	0.11	0.07	0.09	4.43	5.65	15.1	19.42	0.5	0.41	0.28	0.22	0.17	0.15	0.12	0.12	1.59	4.59	8.16	18.91	0.35	0.22	0.13	0.1	0.07	0.09	0.03	0.07
GANetLvl1	landscape1_6	2.15	2.22	8.46	9.4	0.39	0.25	0.16	0.12	0.1	0.08	0.07	0.06	2.18	2.27	6.85	8.37	0.47	0.38	0.25	0.19	0.16	0.12	0.1	0.08	2.12	2.19	9.59	10.18	0.32	0.13	0.08	0.06	0.05	0.05	0.04	0.05
GANetLvl1	landscape3_2	2.36	2.47	6.91	6.98	0.33	0.4	0.25	0.26	0.22	0.23	0.2	0.2	2.61	2.84	8.32	8.67	0.36	0.42	0.22	0.25	0.17	0.19	0.13	0.15	2.19	2.2	5.69	5.45	0.31	0.38	0.27	0.28	0.26	0.26	0.24	0.24
GANetLvl1	landscape5_2	8.29	0.79	15.21	2.17	0.9	0.43	0.71	0.11	0.47	0.03	0.39	0.03	7.03	1.67	14.16	3.91	0.91	0.65	0.7	0.3	0.4	0.1	0.27	0.08	8.56	0.61	15.42	1.59	0.9	0.38	0.71	0.07	0.49	0.02	0.41	0.02
GANetLvl1	living_room_1_1	1.13	0.61	2.14	1.18	0.51	0.3	0.31	0.15	0.18	0.07	0.05	0.02	1.44	0.92	2.61	1.59	0.61	0.48	0.42	0.26	0.26	0.13	0.07	0.04	0.78	0.25	1.42	0.34	0.39	0.1	0.19	0.01	0.1	0	0.03	0
GANetLvl1	living_room_2_3	0.84	0.32	1.65	0.63	0.36	0.12	0.21	0.02	0.11	0.01	0.05	0	1.71	0.62	2.84	1.27	0.6	0.39	0.39	0.11	0.28	0.04	0.15	0.02	0.62	0.24	1.18	0.32	0.3	0.05	0.17	0	0.07	0	0.03	0
GANetLvl0	abstract_bowls_1	3.55	1.63	6.81	4.3	0.69	0.39	0.49	0.2	0.36	0.13	0.26	0.1	3.25	2.56	6.27	5.57	0.67	0.54	0.46	0.34	0.32	0.23	0.23	0.17	3.81	0.82	7.25	2.77	0.7	0.26	0.51	0.08	0.39	0.04	0.28	0.03
GANetLvl0	abstract_bowls_14	8.24	1.55	18.02	5.69	0.8	0.37	0.64	0.18	0.5	0.1	0.37	0.07	4.89	2.52	9.86	7.3	0.75	0.52	0.57	0.32	0.42	0.21	0.26	0.13	10.28	0.96	21.52	4.43	0.83	0.28	0.68	0.09	0.55	0.04	0.43	0.03
GANetLvl0	bones_3	5.64	4.15	12.02	10.2	0.64	0.49	0.42	0.3	0.29	0.22	0.23	0.17	6.3	5.66	12.97	12.18	0.65	0.58	0.45	0.39	0.32	0.28	0.26	0.23	4.2	0.83	9.64	2.62	0.62	0.29	0.35	0.11	0.22	0.07	0.16	0.04
GANetLvl0	bones_6	6.98	6.07	14.89	14.02	0.72	0.6	0.52	0.39	0.34	0.26	0.26	0.21	8.06	7.2	16.32	15.38	0.73	0.67	0.55	0.46	0.37	0.31	0.29	0.25	2.95	1.81	7.35	6.85	0.7	0.33	0.43	0.12	0.22	0.07	0.13	0.05
GANetLvl0	Chairs4	3.7	3.21	6.22	6.51	0.66	0.53	0.53	0.43	0.46	0.35	0.37	0.28	4.15	3.87	6.71	7.21	0.71	0.61	0.61	0.51	0.53	0.43	0.42	0.34	2.29	1.15	4.32	3.54	0.52	0.28	0.3	0.15	0.25	0.1	0.2	0.07
GANetLvl0	chess_8	2.48	1.45	4.79	4.34	0.65	0.41	0.4	0.18	0.27	0.1	0.21	0.07	2.77	2.06	5.49	5.43	0.65	0.54	0.47	0.3	0.31	0.17	0.21	0.11	2.2	0.85	4	2.92	0.65	0.29	0.34	0.06	0.24	0.04	0.2	0.03
GANetLvl0	childroom_1	1.4	0.7	2.78	2.09	0.7	0.25	0.44	0.09	0.14	0.05	0.05	0.03	1.73	1.16	3.68	3.03	0.63	0.38	0.41	0.19	0.2	0.1	0.09	0.07	1.17	0.37	1.89	1	0.75	0.16	0.46	0.02	0.1	0.01	0.02	0.01
GANetLvl0	childroom_12	3.31	2.6	7.99	8.77	0.6	0.37	0.37	0.15	0.24	0.11	0.18	0.1	4.29	4.22	10.11	11.69	0.57	0.47	0.34	0.25	0.24	0.18	0.21	0.16	2.35	0.99	5.1	4.2	0.63	0.27	0.41	0.05	0.23	0.04	0.15	0.03
GANetLvl0	childroom_2	6.1	4.21	14.34	12.45	0.69	0.39	0.54	0.21	0.38	0.16	0.23	0.13	6.83	5.28	15.93	13.98	0.69	0.53	0.53	0.34	0.38	0.23	0.24	0.17	5.41	3.23	12.69	10.85	0.7	0.26	0.55	0.1	0.38	0.09	0.23	0.09
GANetLvl0	childroom_4	1.31	0.9	3.49	3.15	0.53	0.29	0.28	0.1	0.12	0.05	0.04	0.03	1.66	1.29	4.43	4.11	0.55	0.38	0.32	0.16	0.14	0.07	0.06	0.05	0.95	0.51	2.17	1.67	0.5	0.19	0.23	0.03	0.09	0.02	0.02	0.02
GANetLvl0	childroom_6	1.48	0.89	3.64	3	0.62	0.26	0.34	0.1	0.12	0.06	0.07	0.04	1.78	1.36	4.33	3.92	0.59	0.35	0.33	0.18	0.15	0.11	0.1	0.08	1.22	0.47	2.92	1.87	0.63	0.18	0.35	0.04	0.1	0.02	0.04	0.01
GANetLvl0	childroom_9	2.78	2.5	9.36	8.71	0.33	0.28	0.17	0.13	0.12	0.1	0.1	0.09	3.76	3.29	10.49	9.95	0.52	0.45	0.31	0.24	0.21	0.17	0.16	0.13	2.23	2.05	8.65	7.92	0.22	0.18	0.09	0.07	0.07	0.06	0.06	0.06
GANetLvl0	cloth4	3.15	0.74	6.92	2.8	0.76	0.36	0.54	0.08	0.31	0.03	0.15	0.02	4.46	1.85	9.82	5.98	0.74	0.55	0.61	0.28	0.43	0.11	0.22	0.07	2.8	0.44	5.92	0.64	0.77	0.32	0.53	0.03	0.28	0	0.13	0
GANetLvl0	cloth6	3.88	0.89	9.86	2.45	0.74	0.51	0.55	0.17	0.37	0.06	0.2	0.03	5.62	1.65	12.92	4.19	0.78	0.61	0.6	0.34	0.44	0.17	0.28	0.08	3.05	0.52	7.99	0.68	0.72	0.46	0.52	0.09	0.33	0	0.16	0
GANetLvl0	cloth7	8.63	1.3	14.77	3.9	0.74	0.37	0.58	0.14	0.49	0.08	0.46	0.06	5.66	2.09	12.04	5.3	0.66	0.5	0.44	0.25	0.3	0.14	0.27	0.11	11.13	0.64	16.73	2.1	0.81	0.25	0.7	0.05	0.64	0.02	0.62	0.02
GANetLvl0	coral6	2.73	1.6	4.96	4.2	0.72	0.5	0.5	0.19	0.32	0.12	0.22	0.08	4.09	2.88	6.75	6.04	0.76	0.63	0.59	0.4	0.45	0.26	0.35	0.19	1.88	0.81	3.39	2.42	0.7	0.43	0.44	0.06	0.24	0.03	0.13	0.02
GANetLvl0	dining_room_1_1	7.98	8.18	15.54	16.59	0.7	0.56	0.51	0.43	0.38	0.35	0.3	0.29	8.89	9.31	16.36	17.41	0.74	0.68	0.58	0.53	0.44	0.43	0.35	0.35	6.69	6.57	14.3	15.34	0.65	0.4	0.42	0.29	0.3	0.23	0.23	0.2
GANetLvl0	office_top5	1.61	0.81	3.2	2.3	0.74	0.34	0.47	0.12	0.17	0.06	0.08	0.04	2.21	1.58	4.41	3.83	0.66	0.5	0.45	0.3	0.26	0.18	0.17	0.11	1.29	0.4	2.3	0.54	0.79	0.26	0.49	0.03	0.12	0	0.04	0
GANetLvl0	park1	0.82	0.63	1.72	1.93	0.55	0.27	0.2	0.12	0.06	0.05	0.02	0.02	1.05	0.97	2.3	2.66	0.56	0.43	0.29	0.22	0.12	0.1	0.04	0.04	0.58	0.27	0.68	0.36	0.54	0.1	0.1	0.02	0.01	0	0	0
GANetLvl0	park10	1.93	1.84	4.09	4.28	0.59	0.49	0.36	0.26	0.2	0.17	0.13	0.12	2.54	2.59	4.99	5.25	0.61	0.6	0.41	0.39	0.28	0.26	0.19	0.19	0.82	0.49	1.4	1.21	0.56	0.29	0.27	0.02	0.04	0.01	0.01	0.01
GANetLvl0	park6	3	2.48	7.12	6.79	0.64	0.44	0.4	0.21	0.22	0.15	0.14	0.12	5.89	5.57	11.03	10.99	0.74	0.65	0.56	0.46	0.4	0.36	0.31	0.29	1.53	0.91	3.83	2.86	0.59	0.33	0.32	0.08	0.13	0.05	0.06	0.04
GANetLvl0	person1_1	14.84	2.25	25.39	6.63	0.73	0.28	0.59	0.13	0.53	0.11	0.48	0.1	12.37	6.75	18.72	12.31	0.65	0.49	0.52	0.37	0.48	0.32	0.47	0.31	15.62	0.83	27.17	3.15	0.75	0.22	0.62	0.05	0.54	0.04	0.49	0.03
GANetLvl0	person1_3	5.59	4.07	14.95	11.65	0.53	0.4	0.38	0.25	0.28	0.18	0.21	0.15	8.51	7.71	17.97	16.6	0.68	0.59	0.56	0.45	0.43	0.35	0.33	0.28	4.03	2.13	13.05	7.82	0.45	0.3	0.28	0.15	0.2	0.1	0.14	0.08
GANetLvl0	person1_8	6.87	1.29	12.36	4.05	0.77	0.35	0.6	0.14	0.4	0.07	0.33	0.06	6.48	4.18	10.8	8.66	0.65	0.45	0.52	0.32	0.43	0.28	0.39	0.26	6.96	0.58	12.71	1.45	0.8	0.33	0.62	0.09	0.39	0.02	0.31	0.01
GANetLvl0	person2_5	2.58	1.14	5.45	3.71	0.64	0.37	0.45	0.12	0.27	0.06	0.18	0.05	2.94	1.88	6.44	5.21	0.65	0.52	0.46	0.26	0.28	0.13	0.18	0.08	2.38	0.72	4.8	2.51	0.64	0.29	0.45	0.04	0.27	0.03	0.18	0.02
GANetLvl0	person3_10	3.03	2.01	7.45	7.21	0.65	0.3	0.49	0.12	0.31	0.08	0.14	0.07	5.12	3.76	11.59	10.81	0.72	0.5	0.54	0.28	0.36	0.15	0.21	0.12	2.27	1.37	5.16	5.31	0.63	0.23	0.47	0.06	0.29	0.05	0.11	0.05
GANetLvl0	person3_3	5.62	1.79	11.92	5.82	0.71	0.33	0.56	0.15	0.42	0.09	0.26	0.07	7.38	3.93	13.62	9.42	0.77	0.53	0.62	0.33	0.43	0.22	0.32	0.18	5.03	1.08	11.29	3.91	0.69	0.27	0.54	0.09	0.42	0.04	0.24	0.04
GANetLvl0	person3_4	4.59	2.54	10.37	7.46	0.58	0.33	0.38	0.17	0.25	0.12	0.18	0.11	6.67	4.67	13.22	10.8	0.64	0.47	0.44	0.29	0.3	0.22	0.25	0.18	3.41	1.32	8.34	4.58	0.55	0.25	0.34	0.1	0.22	0.07	0.15	0.06
GANetLvl0	plant_vintage12	4.09	2.44	7.4	5.55	0.64	0.52	0.47	0.31	0.35	0.2	0.28	0.15	4.02	3.37	7.51	6.75	0.63	0.58	0.46	0.41	0.35	0.29	0.27	0.22	4.19	0.79	7.21	2.16	0.66	0.4	0.47	0.12	0.37	0.05	0.3	0.03
GANetLvl0	plant_vintage14	1.64	0.59	3.74	1.25	0.62	0.34	0.39	0.08	0.22	0.03	0.06	0.01	2.57	1.07	5.46	2.21	0.72	0.5	0.48	0.26	0.3	0.11	0.13	0.05	1.26	0.4	2.76	0.46	0.59	0.27	0.36	0.01	0.18	0	0.04	0
GANetLvl0	plant_vintage15	1.22	0.61	2.51	1.31	0.55	0.35	0.3	0.09	0.16	0.04	0.05	0.01	1.82	1.08	3.26	2.26	0.63	0.49	0.45	0.28	0.28	0.12	0.1	0.04	0.95	0.4	2.09	0.45	0.51	0.28	0.24	0.01	0.1	0	0.03	0
GANetLvl0	plant_vintage2	2.86	0.68	9.24	2.57	0.73	0.29	0.44	0.08	0.18	0.03	0.08	0.02	3.59	1.14	11.49	3.61	0.72	0.48	0.45	0.2	0.19	0.07	0.11	0.05	2.45	0.43	7.67	1.7	0.74	0.19	0.44	0.02	0.18	0.01	0.07	0
GANetLvl0	plant_vintage4	1.6	0.65	4.44	1.88	0.6	0.3	0.37	0.12	0.18	0.06	0.06	0.02	2.09	1.15	5.45	3.01	0.61	0.49	0.42	0.28	0.26	0.14	0.1	0.05	1.31	0.35	3.7	0.48	0.6	0.19	0.34	0.02	0.14	0.01	0.04	0
GANetLvl0	plant_vintage7	3.49	1.6	7.47	4.16	0.65	0.41	0.42	0.21	0.28	0.14	0.22	0.11	3.8	2.64	8.09	5.62	0.66	0.57	0.46	0.37	0.32	0.26	0.25	0.2	3.13	0.35	6.66	0.49	0.63	0.23	0.38	0.02	0.23	0	0.18	0
GANetLvl0	roundntwist4	2.8	1.1	5.28	3.21	0.75	0.6	0.63	0.34	0.51	0.11	0.18	0.01	1.87	1.26	4.67	4.06	0.63	0.49	0.46	0.34	0.33	0.17	0.07	0.02	4.22	0.86	6.09	0.99	0.94	0.76	0.89	0.35	0.76	0.03	0.34	0
GANetLvl0	ScifiKnot1	1.84	1.03	3.61	2.6	0.55	0.42	0.33	0.17	0.24	0.09	0.17	0.06	2.55	1.95	4.46	4.13	0.64	0.59	0.44	0.36	0.33	0.22	0.24	0.15	1.4	0.46	2.97	0.69	0.49	0.32	0.27	0.06	0.18	0.01	0.13	0
GANetLvl0	ScifiKnot4	7.62	4	14.47	11.31	0.84	0.6	0.71	0.26	0.56	0.16	0.38	0.13	9.15	7.14	17.39	15.68	0.81	0.75	0.68	0.52	0.55	0.35	0.4	0.27	7.09	2.93	13.32	9.36	0.86	0.54	0.72	0.17	0.56	0.09	0.38	0.08
GANetLvl0	sleeping_room_1_11	2.08	2.3	7.35	8.18	0.34	0.24	0.17	0.11	0.1	0.08	0.07	0.07	3.84	4.42	10.91	12.21	0.55	0.47	0.33	0.25	0.18	0.15	0.12	0.13	1.43	1.52	5.5	6.07	0.26	0.16	0.11	0.06	0.07	0.05	0.05	0.05
GANetLvl0	living_room_3_5	2.5	2.12	6.2	5.4	0.52	0.54	0.34	0.31	0.21	0.18	0.13	0.11	3.48	3.31	7.8	7.28	0.6	0.62	0.44	0.44	0.29	0.29	0.2	0.19	1.63	1.06	4.3	2.84	0.44	0.47	0.26	0.19	0.15	0.09	0.08	0.04
GANetLvl0	living_room_3_9	1.8	0.7	7.15	2.71	0.51	0.34	0.24	0.08	0.09	0.03	0.05	0.02	2.55	1.33	9.02	4.65	0.61	0.49	0.35	0.21	0.13	0.08	0.07	0.05	1.42	0.39	5.98	0.47	0.46	0.27	0.18	0.01	0.07	0	0.04	0
GANetLvl0	mannequins_10	8.16	5.28	17.87	13.25	0.65	0.52	0.5	0.32	0.38	0.24	0.3	0.2	10.87	7.72	21.5	16.37	0.7	0.64	0.56	0.46	0.44	0.35	0.36	0.29	3.45	1.05	8.35	3.81	0.55	0.32	0.4	0.08	0.28	0.05	0.2	0.04
GANetLvl0	mannequins_12	8.5	2.75	15.32	6.88	0.69	0.43	0.61	0.23	0.55	0.18	0.48	0.15	6.74	4.69	12.21	9.43	0.6	0.51	0.5	0.39	0.43	0.31	0.38	0.28	10.22	0.84	17.85	2.57	0.78	0.35	0.72	0.08	0.67	0.05	0.57	0.04
GANetLvl0	mannequins_2	5.39	2.29	9.44	6.21	0.64	0.45	0.55	0.25	0.48	0.17	0.35	0.12	4.91	3.21	9.62	7.55	0.59	0.51	0.49	0.37	0.41	0.26	0.28	0.18	6.34	0.49	9.07	1.54	0.72	0.32	0.67	0.03	0.63	0.01	0.5	0
GANetLvl0	mannequins_5	2.39	1.21	6.43	3.63	0.57	0.36	0.4	0.2	0.28	0.11	0.16	0.07	2.92	1.79	7.83	4.68	0.58	0.47	0.43	0.3	0.31	0.18	0.18	0.12	1.62	0.37	3.51	0.67	0.56	0.2	0.36	0.04	0.24	0.01	0.12	0
GANetLvl0	mannequins_9	3.36	2.03	6.42	4.9	0.58	0.47	0.44	0.26	0.36	0.17	0.24	0.12	3.44	2.67	6.78	5.75	0.59	0.54	0.45	0.36	0.36	0.23	0.21	0.16	3.18	0.63	5.54	1.99	0.55	0.32	0.42	0.04	0.36	0.02	0.29	0.02
GANetLvl0	Minicubes4	4.86	4.03	8.37	7.49	0.74	0.61	0.56	0.43	0.42	0.34	0.33	0.28	4.45	3.99	7.87	7.46	0.72	0.61	0.56	0.46	0.43	0.36	0.32	0.28	5.62	4.11	9.24	7.54	0.77	0.61	0.58	0.37	0.4	0.3	0.36	0.27
GANetLvl0	Minicubes5	6.67	4.98	13.73	12.46	0.76	0.6	0.6	0.41	0.43	0.33	0.34	0.27	4.04	4.02	8.77	11.24	0.73	0.58	0.55	0.42	0.39	0.3	0.28	0.23	10.46	6.35	18.7	14.04	0.8	0.61	0.66	0.41	0.49	0.37	0.43	0.31
GANetLvl0	Minicubes9	9.04	1.6	17.63	3.86	0.81	0.53	0.7	0.26	0.59	0.15	0.46	0.09	4.51	2.4	8.54	5.06	0.74	0.62	0.6	0.42	0.48	0.26	0.34	0.16	14.84	0.58	24.78	1.11	0.89	0.42	0.82	0.07	0.73	0.02	0.61	0.01
GANetLvl0	moto3	1.46	1.42	3.7	5.94	0.57	0.45	0.32	0.18	0.19	0.1	0.08	0.05	1.96	1.62	5.02	5.51	0.6	0.54	0.37	0.29	0.24	0.16	0.13	0.07	1.06	1.26	2.12	6.26	0.54	0.38	0.28	0.1	0.15	0.04	0.05	0.03
GANetLvl0	music1_1	3.71	1.61	8.48	5.13	0.58	0.3	0.41	0.2	0.28	0.13	0.19	0.07	4.39	2.8	9.62	7.18	0.63	0.51	0.49	0.36	0.34	0.23	0.21	0.14	3.37	1.01	7.85	3.7	0.55	0.19	0.37	0.13	0.25	0.08	0.18	0.04
GANetLvl0	music1_6	5.74	4.4	11.48	11.5	0.71	0.51	0.58	0.32	0.45	0.22	0.33	0.18	6.87	5.97	13.18	13.11	0.75	0.66	0.61	0.47	0.48	0.34	0.37	0.27	4.08	2.08	8.36	8.57	0.65	0.29	0.54	0.1	0.41	0.06	0.26	0.05
GANetLvl0	music1_7	2.11	1.32	5.87	4.94	0.49	0.23	0.27	0.12	0.17	0.08	0.1	0.06	3.88	2.6	8.9	7.35	0.65	0.49	0.46	0.32	0.32	0.2	0.2	0.12	1.35	0.77	3.92	3.43	0.42	0.12	0.19	0.04	0.11	0.03	0.06	0.03
GANetLvl0	music1_9	6.49	1.51	11.6	4.59	0.77	0.4	0.6	0.17	0.48	0.11	0.37	0.07	7.91	3.69	14.85	8.25	0.69	0.57	0.56	0.39	0.44	0.27	0.33	0.2	6.09	0.9	10.52	2.82	0.79	0.35	0.62	0.11	0.5	0.06	0.39	0.04
GANetLvl0	nest5	8.97	7.17	26.12	24.84	0.78	0.61	0.62	0.41	0.48	0.32	0.37	0.25	10.68	10.55	32.06	31.3	0.79	0.7	0.63	0.56	0.5	0.45	0.39	0.36	6.94	3.14	16.41	13.58	0.78	0.5	0.61	0.23	0.47	0.16	0.36	0.12
GANetLvl0	office1	2.58	0.67	7.19	2.66	0.72	0.36	0.44	0.1	0.19	0.03	0.1	0.01	2.5	1.18	8.71	4.41	0.7	0.51	0.41	0.26	0.17	0.08	0.07	0.04	2.63	0.38	6.18	0.45	0.73	0.27	0.46	0.02	0.2	0	0.12	0
GANetLvl0	office12	6.54	2.52	11.46	7.41	0.76	0.29	0.63	0.16	0.52	0.13	0.36	0.11	8.57	4.77	14.22	10.52	0.81	0.44	0.68	0.31	0.56	0.26	0.43	0.22	5.46	1.33	9.69	5.04	0.73	0.22	0.61	0.08	0.5	0.06	0.32	0.05
GANetLvl0	office14	4.34	2.79	9.72	7.81	0.69	0.52	0.43	0.22	0.27	0.15	0.21	0.12	5.49	4.28	11.54	10.13	0.71	0.62	0.54	0.38	0.36	0.26	0.26	0.2	3.52	1.73	8.17	5.61	0.68	0.45	0.36	0.11	0.21	0.08	0.17	0.06
GANetLvl0	office2	1.82	0.57	4.56	2.56	0.71	0.22	0.43	0.06	0.23	0.02	0.08	0.02	2.66	1.23	7.76	4.59	0.68	0.47	0.44	0.2	0.25	0.07	0.11	0.05	1.52	0.33	2.55	1.13	0.72	0.13	0.43	0.01	0.22	0	0.07	0
GANetLvl0	sleeping_room_1_15	3.41	1.38	9.07	5.31	0.63	0.28	0.45	0.14	0.29	0.07	0.14	0.05	4.3	1.98	11.27	6.49	0.69	0.44	0.49	0.25	0.3	0.12	0.14	0.07	2.71	0.91	6.85	4.15	0.58	0.16	0.42	0.04	0.29	0.04	0.14	0.03
GANetLvl0	sleeping_room_1_3	2.69	2.38	7.12	7.75	0.78	0.45	0.45	0.2	0.17	0.12	0.11	0.1	4.09	3.41	10.66	10.91	0.77	0.57	0.51	0.32	0.26	0.18	0.16	0.12	2.23	2.04	5.46	6.36	0.78	0.41	0.43	0.15	0.14	0.1	0.09	0.09
GANetLvl0	sleeping_room_1_7	2.47	1.03	6.62	3.44	0.7	0.44	0.42	0.15	0.24	0.07	0.13	0.05	3.9	2.23	9.76	6.06	0.72	0.56	0.5	0.33	0.3	0.2	0.2	0.14	1.82	0.48	4.54	0.77	0.7	0.39	0.38	0.06	0.21	0.01	0.09	0
GANetLvl0	spaceStation2	16.09	12.62	23.84	18.58	0.84	0.83	0.75	0.73	0.7	0.68	0.68	0.65	5.32	5.22	9.24	9.06	0.71	0.69	0.5	0.48	0.39	0.38	0.35	0.35	21.57	16.39	28.53	21.89	0.9	0.9	0.87	0.86	0.85	0.83	0.84	0.8
GANetLvl0	stack_circles4	14.66	2.29	21.11	5.74	0.76	0.51	0.66	0.22	0.59	0.14	0.56	0.12	9.05	4.45	15.76	8.71	0.72	0.58	0.57	0.39	0.46	0.29	0.39	0.25	17.8	1.08	23.58	2.98	0.78	0.48	0.72	0.13	0.66	0.06	0.65	0.05
GANetLvl0	stack_circles9	17.19	2.8	27.67	6.62	0.8	0.59	0.73	0.27	0.68	0.19	0.65	0.15	9.29	4.73	17.93	9.29	0.65	0.64	0.53	0.42	0.46	0.31	0.4	0.27	22.16	1.59	32.33	4.12	0.9	0.55	0.86	0.17	0.82	0.1	0.8	0.08
GANetLvl0	time_travellers_10	29.01	5.14	41.35	15.67	0.78	0.32	0.65	0.16	0.56	0.13	0.53	0.11	22.85	12.15	34.74	24.4	0.79	0.58	0.63	0.42	0.51	0.33	0.46	0.28	31.51	2.29	43.76	10.16	0.78	0.22	0.65	0.06	0.59	0.05	0.56	0.05
GANetLvl0	time_travellers_13	11.85	2.1	16.81	5.39	0.78	0.49	0.7	0.17	0.65	0.13	0.62	0.11	7.92	4.12	12.54	8.13	0.65	0.58	0.54	0.35	0.49	0.28	0.45	0.24	14.56	0.71	19.2	1.91	0.87	0.43	0.81	0.04	0.76	0.03	0.74	0.02
GANetLvl0	time_travellers_15	16.83	3.57	24.16	9.23	0.76	0.37	0.65	0.19	0.6	0.16	0.58	0.15	11.77	7.7	18.96	13.95	0.69	0.58	0.55	0.43	0.48	0.36	0.45	0.33	19.75	1.19	26.71	4.7	0.8	0.25	0.71	0.06	0.67	0.05	0.66	0.04
GANetLvl0	time_travellers_2	9.68	2.71	15.7	7.34	0.7	0.44	0.6	0.2	0.55	0.15	0.52	0.13	7.26	5.13	13	10.74	0.64	0.57	0.51	0.38	0.43	0.29	0.38	0.25	11.43	0.96	17.39	3.1	0.75	0.35	0.67	0.07	0.63	0.05	0.62	0.04
GANetLvl0	time_travellers_20	10.55	1.28	19.08	3.13	0.85	0.54	0.78	0.14	0.72	0.09	0.65	0.07	8.06	2.55	16.29	5.11	0.71	0.59	0.61	0.35	0.55	0.23	0.49	0.18	11.82	0.64	20.36	1.22	0.92	0.51	0.87	0.04	0.81	0.02	0.74	0.02
GANetLvl0	time_travellers_24	39.12	3.32	54.31	9.9	0.87	0.47	0.79	0.21	0.72	0.16	0.66	0.13	26.09	8.56	38.62	17.95	0.84	0.63	0.74	0.41	0.64	0.32	0.56	0.28	43.56	1.53	58.69	4.66	0.88	0.41	0.81	0.13	0.75	0.1	0.69	0.08
GANetLvl0	time_travellers_25	13.41	3.83	21.99	10.26	0.69	0.45	0.56	0.22	0.51	0.17	0.5	0.15	11.35	7.34	19.8	14.72	0.67	0.6	0.52	0.42	0.44	0.33	0.42	0.29	14.77	1.51	23.33	5.62	0.71	0.36	0.6	0.09	0.55	0.07	0.55	0.06
GANetLvl0	time_travellers_3	14.86	2.99	21.99	8.18	0.81	0.45	0.69	0.21	0.62	0.16	0.59	0.14	10.76	5.55	17.82	11.77	0.74	0.58	0.59	0.39	0.5	0.3	0.46	0.26	17.91	1.08	24.64	3.69	0.86	0.35	0.77	0.08	0.71	0.06	0.69	0.04
GANetLvl0	twirls2	2.13	1.16	5.6	4.62	0.58	0.48	0.39	0.18	0.29	0.07	0.13	0.04	3.05	2.08	8.3	7.27	0.66	0.58	0.48	0.33	0.36	0.15	0.17	0.09	1.53	0.56	2.66	1	0.53	0.41	0.33	0.07	0.26	0.02	0.11	0.01
GANetLvl0	twirls3	2.04	0.92	6.32	3.46	0.59	0.44	0.39	0.15	0.27	0.07	0.1	0.03	3.1	1.76	9.86	5.88	0.68	0.59	0.48	0.32	0.34	0.16	0.16	0.09	1.51	0.5	3.33	0.76	0.54	0.37	0.35	0.06	0.24	0.02	0.07	0.01
GANetLvl0	voronoid_sphere6	6.15	4.72	12.09	10.63	0.7	0.66	0.5	0.35	0.35	0.23	0.27	0.19	7.22	6.3	13.36	12.44	0.73	0.74	0.56	0.48	0.41	0.32	0.32	0.26	4.37	2.08	9.6	6.55	0.65	0.54	0.4	0.11	0.25	0.07	0.19	0.07
GANetLvl0	voronoid_sphere9	8.38	4.49	17.18	9.96	0.58	0.52	0.49	0.38	0.46	0.32	0.42	0.28	6.32	5.03	14.41	10.7	0.53	0.5	0.43	0.41	0.39	0.36	0.35	0.32	20.37	1.35	28.35	3.11	0.87	0.64	0.84	0.22	0.84	0.09	0.84	0.07
GANetLvl0	walker4	9.28	2.43	16.16	5.71	0.83	0.42	0.75	0.26	0.69	0.2	0.63	0.18	8.99	4.34	18.72	8.34	0.72	0.53	0.59	0.42	0.51	0.36	0.48	0.33	9.47	1.25	14.34	3.12	0.9	0.35	0.85	0.16	0.8	0.1	0.72	0.08
GANetLvl0	windmills4	2.12	1.01	5.44	3.49	0.75	0.47	0.49	0.12	0.21	0.06	0.11	0.04	3.63	2.72	8.42	7.2	0.74	0.66	0.54	0.38	0.35	0.22	0.25	0.15	1.71	0.53	4.26	1.08	0.75	0.42	0.48	0.05	0.17	0.01	0.07	0.01
GANetLvl0	youngster_room10	4.29	1.82	12.7	5.3	0.59	0.4	0.37	0.18	0.23	0.12	0.16	0.08	4.05	3.46	9.08	7.89	0.68	0.54	0.47	0.34	0.33	0.24	0.21	0.17	4.41	1.04	14.11	3.4	0.54	0.33	0.32	0.11	0.18	0.06	0.14	0.04
GANetLvl0	youngster_room14	6.24	4.48	14.32	13.4	0.71	0.53	0.56	0.29	0.41	0.17	0.27	0.12	5.39	4.67	14.57	14.27	0.69	0.56	0.49	0.34	0.32	0.2	0.21	0.14	6.69	4.38	14.18	12.91	0.72	0.51	0.59	0.26	0.45	0.15	0.31	0.11
GANetLvl0	youngster_room4	1.64	0.98	3.3	2.92	0.71	0.4	0.43	0.15	0.18	0.06	0.08	0.04	2.38	1.92	4.91	4.83	0.69	0.52	0.46	0.32	0.24	0.15	0.14	0.11	1.28	0.51	2.06	1.06	0.72	0.33	0.42	0.06	0.15	0.02	0.05	0.01
GANetLvl0	youngster_room7	2.4	1.74	5.6	5.55	0.75	0.37	0.49	0.18	0.22	0.12	0.11	0.08	3.67	3.12	8.28	8.02	0.69	0.51	0.5	0.31	0.29	0.22	0.18	0.16	1.75	1.04	3.53	3.72	0.77	0.29	0.49	0.11	0.19	0.06	0.07	0.05
GANetLvl0	youngster_room9	1.74	1.18	4.63	4.15	0.69	0.33	0.35	0.12	0.11	0.06	0.06	0.05	2.75	2.4	6.82	6.71	0.65	0.49	0.41	0.27	0.19	0.15	0.12	0.11	1.3	0.66	3.28	2.31	0.7	0.27	0.33	0.06	0.08	0.03	0.03	0.02
GANetLvl0	dining_room_1_13	2.54	1.08	4.57	3.13	0.62	0.39	0.45	0.15	0.34	0.08	0.21	0.05	2.31	1.76	4.53	4.4	0.65	0.54	0.45	0.3	0.32	0.15	0.13	0.08	2.67	0.68	4.59	2	0.6	0.3	0.45	0.05	0.35	0.03	0.26	0.03
GANetLvl0	living_room_3_2	5.64	0.74	13.51	2.32	0.71	0.37	0.42	0.08	0.29	0.04	0.21	0.03	5.87	1.95	14.43	4.86	0.74	0.56	0.51	0.33	0.38	0.2	0.24	0.13	5.57	0.39	13.24	0.46	0.7	0.32	0.4	0.01	0.26	0	0.2	0
GANetLvl0	office_top4	2.57	0.86	7.33	5.04	0.84	0.25	0.52	0.07	0.21	0.03	0.1	0.02	3.12	2.1	9.02	9	0.79	0.46	0.53	0.22	0.22	0.08	0.11	0.06	2.31	0.3	6.41	0.36	0.86	0.16	0.51	0	0.21	0	0.09	0
GANetLvl0	sleeping_room_1_13	3.46	0.84	6.88	2.95	0.77	0.35	0.55	0.1	0.37	0.04	0.23	0.03	3.53	1.91	7.6	5.52	0.73	0.47	0.53	0.25	0.32	0.14	0.21	0.1	3.44	0.47	6.61	1.11	0.79	0.3	0.56	0.05	0.39	0.01	0.24	0.01
GANetLvl0	dining_room_1_5	2.85	2.48	6.46	7.18	0.68	0.52	0.48	0.27	0.3	0.17	0.16	0.12	3.26	3.04	7.26	8.02	0.68	0.6	0.47	0.38	0.3	0.23	0.19	0.16	2.45	1.93	5.59	6.27	0.68	0.45	0.48	0.17	0.3	0.11	0.13	0.08
GANetLvl0	dining_room_1_7	7.12	3.45	12.68	8.48	0.78	0.55	0.63	0.3	0.47	0.2	0.32	0.16	6.6	5.31	12.24	10.86	0.76	0.67	0.61	0.48	0.46	0.33	0.31	0.25	7.73	1.31	13.17	4.31	0.81	0.42	0.65	0.1	0.48	0.06	0.33	0.05
GANetLvl0	dining_room_1_9	1.88	1.03	5.87	2.75	0.7	0.51	0.38	0.2	0.17	0.08	0.07	0.04	2.6	1.5	7.81	3.76	0.67	0.57	0.45	0.33	0.24	0.14	0.12	0.08	1.08	0.52	2.32	0.62	0.74	0.45	0.3	0.06	0.08	0.01	0.02	0
GANetLvl0	floating_cubes1	6.39	2.07	12.67	5.28	0.8	0.55	0.62	0.35	0.57	0.23	0.51	0.15	5.99	3.44	11.76	7.58	0.81	0.62	0.61	0.46	0.54	0.39	0.49	0.29	6.7	1.03	13.33	2.31	0.79	0.49	0.63	0.26	0.59	0.1	0.52	0.04
GANetLvl0	fruit1	1.52	1	3.28	3.24	0.73	0.49	0.4	0.19	0.22	0.08	0.06	0.04	2.13	1.65	4.95	5.27	0.71	0.59	0.48	0.32	0.28	0.14	0.11	0.07	1.2	0.64	1.82	1.08	0.74	0.44	0.35	0.13	0.18	0.05	0.03	0.02
GANetLvl0	fruit6	3.01	1.82	6.64	5.67	0.53	0.37	0.33	0.16	0.25	0.11	0.2	0.08	5.18	3.94	9.62	8.97	0.71	0.6	0.56	0.39	0.42	0.27	0.34	0.2	2.14	0.96	4.95	3.55	0.46	0.28	0.24	0.07	0.18	0.04	0.15	0.03
GANetLvl0	fruit8	3.11	0.89	7.33	2.61	0.68	0.34	0.42	0.14	0.36	0.07	0.17	0.04	3.38	1.77	7.08	4.24	0.73	0.53	0.52	0.33	0.41	0.16	0.19	0.09	2.98	0.48	7.45	1.27	0.65	0.25	0.38	0.05	0.34	0.02	0.16	0.01
GANetLvl0	hacienda1	1.39	1.11	3.63	2.45	0.65	0.64	0.39	0.37	0.18	0.13	0.04	0.02	1.62	1.21	4.79	3.19	0.62	0.58	0.36	0.33	0.2	0.16	0.06	0.03	1.14	1	1.55	1.23	0.68	0.71	0.42	0.41	0.17	0.11	0.03	0
GANetLvl0	hacienda4	1.64	1.24	3.67	2.3	0.62	0.66	0.32	0.34	0.22	0.18	0.06	0.03	1.43	1.27	3.22	2.48	0.6	0.64	0.31	0.34	0.2	0.18	0.05	0.04	1.88	1.21	4.12	2.07	0.65	0.69	0.34	0.34	0.24	0.19	0.08	0.03
GANetLvl0	hacienda8	6.92	10.49	16.87	24.2	0.67	0.55	0.34	0.28	0.21	0.23	0.18	0.21	3.57	5.7	10.76	17.13	0.58	0.55	0.32	0.3	0.14	0.15	0.11	0.13	8.18	12.28	18.64	26.36	0.71	0.56	0.35	0.27	0.23	0.25	0.21	0.24
GANetLvl0	landscape1_5	6.42	7.45	19.63	22.59	0.55	0.43	0.28	0.2	0.16	0.15	0.13	0.13	6.75	6.84	20.11	21	0.58	0.49	0.37	0.29	0.23	0.19	0.17	0.16	6.2	7.85	19.31	23.56	0.53	0.39	0.22	0.14	0.12	0.11	0.11	0.11
GANetLvl0	landscape1_6	3.62	3.7	11.78	12.42	0.52	0.39	0.25	0.17	0.14	0.12	0.1	0.1	3.53	3.28	11.12	11.23	0.59	0.46	0.35	0.25	0.2	0.16	0.13	0.11	3.69	4.04	12.3	13.32	0.46	0.33	0.18	0.11	0.09	0.09	0.08	0.09
GANetLvl0	landscape3_2	9.31	8.92	24.8	23.55	0.48	0.5	0.3	0.3	0.24	0.25	0.23	0.23	4.52	4.44	12.83	12.35	0.5	0.55	0.3	0.31	0.21	0.22	0.18	0.19	12.73	12.13	30.62	29.03	0.47	0.47	0.29	0.29	0.27	0.27	0.26	0.26
GANetLvl0	landscape5_2	6.17	0.82	13.38	1.86	0.91	0.59	0.77	0.18	0.45	0.02	0.27	0.02	7.52	1.68	15.91	3.92	0.95	0.75	0.79	0.36	0.44	0.1	0.29	0.07	5.89	0.65	12.8	1.01	0.9	0.55	0.76	0.14	0.45	0.01	0.27	0.01
GANetLvl0	living_room_1_1	1.51	0.84	3.68	1.66	0.62	0.46	0.37	0.19	0.21	0.09	0.06	0.03	2.01	1.2	4.73	2.22	0.68	0.59	0.46	0.33	0.29	0.16	0.09	0.05	0.93	0.42	1.88	0.51	0.54	0.31	0.26	0.03	0.11	0	0.02	0
GANetLvl0	living_room_2_3	1.37	0.75	4.45	3.02	0.68	0.43	0.37	0.07	0.12	0.02	0.03	0.02	3.3	2	9.76	6.72	0.71	0.6	0.48	0.27	0.33	0.12	0.14	0.08	0.9	0.44	1.13	0.51	0.68	0.39	0.34	0.02	0.07	0	0	0
HighResStereo	abstract_bowls_1	1.38	0.7	2.2	1.51	0.65	0.36	0.43	0.17	0.23	0.07	0.07	0.03	1.43	1.13	2.5	2.16	0.64	0.55	0.41	0.29	0.2	0.13	0.07	0.06	1.35	0.33	1.9	0.51	0.66	0.2	0.45	0.06	0.25	0.01	0.07	0
HighResStereo	abstract_bowls_14	4.19	0.71	7.85	1.39	0.69	0.39	0.55	0.19	0.39	0.07	0.28	0.02	2.93	1.15	6.43	2.06	0.64	0.61	0.45	0.33	0.28	0.13	0.17	0.04	4.95	0.45	8.6	0.73	0.72	0.26	0.61	0.11	0.46	0.04	0.34	0
HighResStereo	bones_3	2.43	2.61	6.49	7.25	0.58	0.51	0.37	0.31	0.2	0.18	0.1	0.1	3.21	3.61	7.78	8.74	0.66	0.63	0.44	0.42	0.25	0.25	0.14	0.14	0.74	0.4	1.24	0.72	0.39	0.25	0.23	0.08	0.1	0.02	0.01	0
HighResStereo	bones_6	2.52	2.91	6.99	7.92	0.61	0.59	0.37	0.35	0.17	0.17	0.09	0.11	3.02	3.56	7.85	8.89	0.65	0.67	0.41	0.43	0.19	0.21	0.12	0.13	0.64	0.49	0.98	1.34	0.44	0.3	0.2	0.07	0.06	0	0	0
HighResStereo	Chairs4	2.58	1.6	3.72	2.59	0.77	0.62	0.64	0.43	0.45	0.27	0.22	0.11	2.77	1.96	3.84	2.91	0.83	0.73	0.7	0.55	0.5	0.35	0.24	0.14	1.98	0.48	3.33	1.05	0.6	0.26	0.44	0.07	0.31	0.02	0.15	0.01
HighResStereo	chess_8	1.49	0.55	2.76	1	0.52	0.32	0.3	0.13	0.2	0.05	0.13	0.01	1.55	0.86	2.75	1.39	0.58	0.52	0.35	0.26	0.21	0.1	0.12	0.02	1.43	0.26	2.78	0.35	0.47	0.13	0.25	0.01	0.18	0	0.13	0
HighResStereo	childroom_1	0.42	0.44	0.8	0.85	0.24	0.26	0.08	0.08	0.02	0.03	0.01	0.01	0.65	0.7	1.16	1.25	0.39	0.43	0.17	0.17	0.06	0.07	0.01	0.02	0.27	0.26	0.37	0.35	0.14	0.14	0.02	0.01	0	0	0	0
HighResStereo	childroom_12	0.66	0.65	1.86	1.99	0.31	0.27	0.1	0.1	0.04	0.04	0.02	0.02	1.01	1.05	2.61	2.8	0.45	0.45	0.19	0.17	0.08	0.08	0.05	0.05	0.31	0.26	0.44	0.4	0.18	0.1	0.02	0.02	0	0	0	0
HighResStereo	childroom_2	1.21	1.02	3.07	3.75	0.55	0.39	0.34	0.2	0.12	0.08	0.04	0.03	1.65	1.74	4.1	5.37	0.65	0.63	0.44	0.38	0.18	0.17	0.07	0.07	0.81	0.34	1.62	0.62	0.46	0.17	0.25	0.05	0.06	0.01	0.02	0
HighResStereo	childroom_4	0.45	0.43	0.79	0.78	0.31	0.29	0.1	0.08	0.01	0.01	0	0	0.56	0.6	1.01	1.04	0.41	0.46	0.14	0.16	0.03	0.03	0	0	0.33	0.26	0.47	0.34	0.2	0.12	0.05	0.01	0	0	0	0
HighResStereo	childroom_6	0.51	0.45	0.94	0.95	0.3	0.23	0.11	0.09	0.03	0.03	0.01	0.01	0.67	0.66	1.25	1.32	0.39	0.34	0.16	0.16	0.06	0.07	0.02	0.02	0.37	0.27	0.53	0.4	0.21	0.13	0.07	0.03	0.01	0	0	0
HighResStereo	childroom_9	0.52	0.51	1.37	1.43	0.23	0.22	0.1	0.1	0.03	0.04	0.02	0.02	0.96	1.04	2.21	2.35	0.43	0.48	0.23	0.26	0.09	0.1	0.04	0.05	0.27	0.2	0.41	0.28	0.12	0.07	0.02	0.01	0	0	0	0
HighResStereo	cloth4	1.01	0.37	1.31	0.52	0.6	0.24	0.47	0.06	0.17	0.01	0	0	1.15	0.63	1.48	0.84	0.62	0.49	0.52	0.19	0.2	0.03	0	0	0.97	0.3	1.26	0.4	0.59	0.17	0.45	0.03	0.16	0	0	0
HighResStereo	cloth6	0.9	0.44	1.33	0.73	0.51	0.26	0.29	0.08	0.14	0.03	0.01	0	1.12	0.73	1.62	1.15	0.61	0.46	0.38	0.22	0.19	0.08	0.03	0.01	0.79	0.3	1.16	0.39	0.46	0.16	0.25	0.02	0.12	0	0.01	0
HighResStereo	cloth7	4.14	0.83	6.51	2.33	0.65	0.34	0.47	0.14	0.39	0.05	0.37	0.03	2.92	1.27	5.49	2.99	0.62	0.54	0.37	0.25	0.23	0.1	0.21	0.06	5.17	0.46	7.27	1.58	0.68	0.17	0.56	0.05	0.53	0.02	0.5	0.01
HighResStereo	coral6	1.42	0.89	2.7	1.72	0.48	0.41	0.3	0.22	0.2	0.11	0.1	0.04	2.25	1.64	3.59	2.6	0.69	0.7	0.51	0.47	0.34	0.25	0.19	0.1	0.9	0.43	1.95	0.76	0.35	0.23	0.18	0.07	0.11	0.03	0.05	0.01
HighResStereo	dining_room_1_1	2.67	3.07	6.71	7.6	0.62	0.63	0.45	0.48	0.28	0.3	0.15	0.15	3.71	4.3	8.55	9.57	0.73	0.76	0.54	0.59	0.33	0.36	0.2	0.21	1.19	1.31	2.23	3.05	0.47	0.44	0.31	0.31	0.2	0.21	0.08	0.06
HighResStereo	office_top5	0.62	0.49	1.09	0.88	0.37	0.29	0.14	0.11	0.06	0.03	0.02	0.01	0.95	0.91	1.54	1.4	0.52	0.58	0.29	0.29	0.11	0.09	0.05	0.03	0.45	0.27	0.75	0.4	0.29	0.14	0.07	0.02	0.03	0	0.01	0
HighResStereo	park1	0.45	0.45	0.77	0.78	0.27	0.28	0.1	0.12	0.03	0.03	0	0	0.67	0.7	1.03	1.05	0.44	0.48	0.19	0.2	0.06	0.06	0.01	0.01	0.21	0.19	0.3	0.3	0.09	0.06	0.01	0.02	0	0	0	0
HighResStereo	park10	1.22	1.31	2.74	2.9	0.45	0.48	0.27	0.3	0.14	0.16	0.07	0.07	1.74	1.88	3.39	3.59	0.63	0.68	0.4	0.44	0.21	0.24	0.11	0.11	0.28	0.29	0.51	0.47	0.12	0.12	0.03	0.03	0.01	0.01	0	0
HighResStereo	park6	1.11	1.12	3.1	3.66	0.56	0.4	0.24	0.18	0.07	0.08	0.03	0.05	2.19	2.58	5.26	6.27	0.68	0.64	0.43	0.41	0.21	0.22	0.1	0.14	0.56	0.38	0.71	0.52	0.5	0.28	0.15	0.06	0	0	0	0
HighResStereo	person1_1	7.85	1.05	12.45	4.51	0.64	0.14	0.55	0.05	0.47	0.04	0.42	0.04	7.67	2.75	13.37	7.63	0.54	0.36	0.41	0.18	0.34	0.13	0.32	0.11	7.9	0.51	12.15	2.89	0.67	0.08	0.59	0.01	0.51	0.01	0.45	0.01
HighResStereo	person1_3	2.83	2.78	7.88	8.25	0.46	0.36	0.3	0.24	0.2	0.17	0.15	0.15	3	3.18	8.71	9.98	0.6	0.52	0.41	0.34	0.28	0.22	0.16	0.16	2.74	2.57	7.4	7.16	0.38	0.27	0.24	0.19	0.16	0.14	0.14	0.14
HighResStereo	person1_8	4.28	0.52	7.04	1.34	0.58	0.24	0.47	0.1	0.41	0.04	0.33	0.01	4.23	1.13	7.43	2.77	0.57	0.38	0.4	0.2	0.33	0.11	0.28	0.05	4.29	0.38	6.94	0.59	0.59	0.2	0.49	0.07	0.43	0.02	0.35	0
HighResStereo	person2_5	1.35	0.48	2.28	0.83	0.53	0.3	0.34	0.11	0.21	0.03	0.11	0	1.29	0.83	2.17	1.28	0.57	0.56	0.36	0.27	0.18	0.08	0.09	0.01	1.39	0.28	2.33	0.4	0.51	0.15	0.32	0.03	0.23	0	0.13	0
HighResStereo	person3_10	0.67	0.47	1.14	1.01	0.44	0.28	0.18	0.11	0.06	0.02	0.01	0.01	1.03	0.94	1.77	1.82	0.55	0.53	0.3	0.29	0.13	0.09	0.04	0.03	0.54	0.3	0.79	0.43	0.39	0.18	0.14	0.05	0.03	0	0	0
HighResStereo	person3_3	0.93	0.4	1.61	1.23	0.47	0.16	0.3	0.07	0.14	0.02	0.02	0.01	1.36	1.04	2.39	2.4	0.67	0.49	0.41	0.26	0.18	0.1	0.06	0.04	0.79	0.18	1.23	0.26	0.4	0.05	0.26	0.01	0.13	0	0.01	0
HighResStereo	person3_4	0.76	0.75	2.11	2.68	0.36	0.3	0.15	0.09	0.05	0.03	0.03	0.02	1.29	1.54	3.33	4.42	0.51	0.51	0.26	0.2	0.1	0.09	0.06	0.07	0.46	0.31	0.85	0.41	0.28	0.18	0.09	0.02	0.02	0	0.01	0
HighResStereo	plant_vintage12	1.94	1.29	3.65	3.14	0.58	0.41	0.39	0.23	0.26	0.14	0.17	0.07	2.17	1.87	4.15	3.91	0.61	0.58	0.41	0.36	0.26	0.21	0.18	0.11	1.53	0.26	2.52	0.45	0.52	0.1	0.37	0.02	0.25	0.01	0.16	0
HighResStereo	plant_vintage14	0.57	0.33	0.86	0.53	0.34	0.18	0.18	0.07	0.05	0.01	0	0	0.79	0.64	1.13	0.88	0.47	0.46	0.29	0.22	0.11	0.04	0	0	0.48	0.21	0.73	0.28	0.29	0.06	0.14	0.01	0.03	0	0	0
HighResStereo	plant_vintage15	0.54	0.34	0.86	0.58	0.3	0.19	0.15	0.08	0.08	0.02	0	0	0.73	0.66	1.1	0.94	0.41	0.44	0.26	0.21	0.12	0.06	0	0	0.45	0.21	0.72	0.3	0.26	0.07	0.1	0.02	0.06	0	0	0
HighResStereo	plant_vintage2	0.74	0.57	0.97	0.73	0.57	0.5	0.28	0.15	0.04	0	0	0	0.77	0.68	1.08	0.91	0.54	0.57	0.3	0.25	0.05	0.01	0.01	0.01	0.72	0.5	0.9	0.61	0.59	0.46	0.27	0.09	0.03	0	0	0
HighResStereo	plant_vintage4	0.64	0.43	0.97	0.69	0.36	0.26	0.22	0.1	0.09	0.02	0	0	0.76	0.69	1.13	1	0.44	0.45	0.28	0.23	0.11	0.06	0.01	0	0.57	0.28	0.86	0.39	0.31	0.15	0.18	0.03	0.08	0	0	0
HighResStereo	plant_vintage7	0.97	0.98	2.14	2.31	0.42	0.37	0.21	0.19	0.1	0.1	0.06	0.06	1.51	1.59	2.87	3.12	0.59	0.56	0.34	0.34	0.18	0.18	0.1	0.11	0.32	0.26	0.45	0.36	0.22	0.14	0.04	0.02	0	0	0	0
HighResStereo	roundntwist4	2.19	1.7	2.72	2.05	0.77	0.78	0.67	0.61	0.5	0.47	0.19	0	1.45	1.34	1.97	1.76	0.63	0.7	0.47	0.46	0.33	0.31	0.05	0.01	3.32	2.24	3.56	2.43	0.99	0.91	0.96	0.85	0.77	0.71	0.41	0
HighResStereo	ScifiKnot1	1.06	0.84	1.8	1.49	0.49	0.44	0.26	0.2	0.17	0.11	0.07	0.04	1.46	1.33	2.31	2.12	0.6	0.64	0.37	0.36	0.25	0.2	0.11	0.08	0.82	0.54	1.4	0.92	0.43	0.32	0.2	0.11	0.12	0.05	0.04	0.01
HighResStereo	ScifiKnot4	3.58	0.98	5.31	2.55	0.82	0.41	0.62	0.2	0.47	0.09	0.33	0.05	3.71	2.23	5.86	4.65	0.8	0.65	0.65	0.47	0.48	0.25	0.3	0.13	3.54	0.56	5.11	1.16	0.83	0.33	0.61	0.1	0.46	0.03	0.34	0.02
HighResStereo	sleeping_room_1_11	1.87	0.46	3.18	0.84	0.61	0.24	0.4	0.09	0.26	0.03	0.17	0.01	1.16	0.78	2.02	1.28	0.59	0.49	0.34	0.23	0.13	0.07	0.05	0.02	2.13	0.34	3.51	0.6	0.62	0.15	0.43	0.05	0.31	0.02	0.21	0
HighResStereo	living_room_3_5	1.48	1.11	3.19	2.09	0.5	0.52	0.29	0.31	0.15	0.14	0.09	0.05	1.63	1.65	3.22	2.81	0.61	0.69	0.38	0.45	0.19	0.24	0.09	0.1	1.34	0.63	3.17	1.12	0.41	0.37	0.22	0.19	0.12	0.06	0.08	0.01
HighResStereo	living_room_3_9	0.6	0.45	0.82	0.7	0.46	0.31	0.2	0.1	0.02	0.02	0	0	0.69	0.63	0.99	0.94	0.52	0.48	0.23	0.18	0.04	0.04	0	0	0.56	0.36	0.72	0.54	0.43	0.23	0.18	0.06	0.01	0.01	0	0
HighResStereo	mannequins_10	4.73	5.53	12.34	14.27	0.64	0.54	0.47	0.34	0.31	0.23	0.17	0.16	6.28	7.29	14.76	16.79	0.71	0.69	0.53	0.48	0.37	0.31	0.23	0.21	2.02	2.45	6.16	8.2	0.52	0.29	0.35	0.11	0.19	0.09	0.07	0.08
HighResStereo	mannequins_12	4.08	1.03	6.27	3.12	0.71	0.31	0.6	0.14	0.47	0.08	0.37	0.06	3.57	1.82	6.36	4.39	0.63	0.51	0.48	0.27	0.36	0.16	0.27	0.11	4.58	0.26	6.18	0.59	0.8	0.12	0.71	0.01	0.58	0.01	0.47	0
HighResStereo	mannequins_2	4.01	1.51	6.88	4.19	0.67	0.48	0.56	0.26	0.42	0.13	0.29	0.07	3.13	2.1	6.05	5.09	0.65	0.63	0.5	0.38	0.33	0.2	0.2	0.1	5.74	0.34	8.28	1.04	0.73	0.18	0.66	0.03	0.58	0	0.45	0
HighResStereo	mannequins_5	1.1	0.68	1.76	1.28	0.54	0.39	0.34	0.16	0.17	0.06	0.06	0.02	1.19	0.93	1.89	1.63	0.59	0.55	0.37	0.25	0.18	0.09	0.06	0.04	0.97	0.3	1.55	0.41	0.47	0.17	0.29	0.02	0.15	0	0.05	0
HighResStereo	mannequins_9	1.51	1.34	2.77	3.28	0.54	0.48	0.38	0.29	0.25	0.13	0.09	0.06	1.63	1.75	3.01	3.83	0.6	0.62	0.4	0.4	0.25	0.18	0.09	0.08	1.24	0.41	2.13	1.5	0.42	0.18	0.32	0.04	0.24	0.01	0.1	0.01
HighResStereo	Minicubes4	3.73	3.04	6.39	5.7	0.66	0.55	0.47	0.4	0.36	0.3	0.28	0.23	3.41	3.09	6.06	5.77	0.66	0.59	0.49	0.43	0.36	0.31	0.25	0.23	4.31	2.94	6.95	5.56	0.64	0.48	0.45	0.34	0.37	0.28	0.35	0.23
HighResStereo	Minicubes5	3.07	1.91	4.94	3.27	0.63	0.53	0.47	0.38	0.36	0.3	0.3	0.2	2.42	1.82	4.16	3.21	0.63	0.59	0.44	0.38	0.3	0.26	0.22	0.16	4	2.04	5.89	3.35	0.64	0.45	0.52	0.37	0.44	0.35	0.41	0.28
HighResStereo	Minicubes9	2.42	0.8	3.32	1.69	0.75	0.37	0.62	0.2	0.43	0.09	0.28	0.04	2.01	1.23	3.04	2.22	0.68	0.56	0.52	0.34	0.34	0.16	0.18	0.06	2.95	0.25	3.63	0.44	0.85	0.12	0.76	0.03	0.54	0	0.41	0
HighResStereo	moto3	1.03	1.03	1.64	1.56	0.48	0.53	0.31	0.33	0.18	0.16	0.05	0.03	1.15	1.23	1.77	1.83	0.53	0.59	0.35	0.38	0.2	0.2	0.06	0.06	0.93	0.87	1.52	1.3	0.44	0.49	0.27	0.29	0.16	0.12	0.04	0.01
HighResStereo	music1_1	1.97	0.67	5.27	1.31	0.36	0.32	0.22	0.18	0.16	0.09	0.11	0.03	2.78	1.27	6.71	2.05	0.58	0.58	0.38	0.36	0.23	0.2	0.13	0.07	1.56	0.37	4.38	0.69	0.25	0.19	0.14	0.09	0.12	0.03	0.1	0
HighResStereo	music1_6	2.1	2.2	4.8	6.07	0.61	0.44	0.43	0.29	0.27	0.18	0.14	0.11	2.83	3.15	6.05	7.25	0.69	0.66	0.52	0.46	0.35	0.28	0.2	0.16	1.02	0.81	1.72	3.7	0.48	0.13	0.29	0.05	0.16	0.03	0.06	0.03
HighResStereo	music1_7	0.55	0.43	0.99	0.83	0.3	0.2	0.15	0.11	0.06	0.04	0.01	0.01	1.07	0.96	1.63	1.45	0.52	0.52	0.33	0.32	0.18	0.15	0.05	0.02	0.33	0.2	0.51	0.31	0.2	0.06	0.07	0.02	0.01	0	0	0
HighResStereo	music1_9	4.85	1.28	8.55	3.74	0.65	0.34	0.54	0.17	0.43	0.1	0.29	0.07	5.23	2.39	10.12	5.83	0.66	0.58	0.49	0.34	0.33	0.18	0.23	0.11	4.75	0.98	8.05	2.91	0.65	0.27	0.56	0.13	0.46	0.08	0.31	0.06
HighResStereo	nest5	3.85	3.79	20.18	19.74	0.65	0.54	0.48	0.38	0.31	0.26	0.18	0.17	5.29	5.17	25.74	25	0.74	0.71	0.58	0.53	0.4	0.37	0.24	0.23	2.13	2.15	10.13	10.42	0.54	0.35	0.36	0.19	0.21	0.12	0.11	0.09
HighResStereo	office1	0.79	0.44	1.1	0.61	0.48	0.31	0.32	0.1	0.11	0.01	0	0	0.76	0.67	1.04	0.84	0.5	0.54	0.29	0.22	0.08	0.02	0	0	0.81	0.31	1.13	0.42	0.47	0.19	0.34	0.04	0.13	0	0	0
HighResStereo	office12	4.18	0.93	7.09	2.75	0.75	0.3	0.61	0.13	0.44	0.08	0.27	0.05	6.13	1.92	9.14	4.39	0.84	0.54	0.71	0.28	0.56	0.18	0.4	0.12	3.15	0.4	5.71	1.17	0.7	0.17	0.56	0.05	0.37	0.02	0.21	0.01
HighResStereo	office14	1.24	1.14	2.89	3.2	0.47	0.46	0.3	0.28	0.16	0.12	0.07	0.04	1.78	2.12	3.99	4.88	0.64	0.69	0.41	0.5	0.21	0.25	0.1	0.11	0.86	0.45	1.72	0.75	0.36	0.29	0.22	0.12	0.11	0.03	0.05	0
HighResStereo	office2	0.82	0.43	1.07	0.54	0.58	0.3	0.31	0.06	0.09	0	0	0	0.75	0.6	1.04	0.75	0.51	0.53	0.29	0.16	0.06	0.01	0	0	0.85	0.37	1.09	0.44	0.61	0.22	0.32	0.03	0.1	0	0	0
HighResStereo	sleeping_room_1_15	1.11	0.5	1.57	0.72	0.58	0.36	0.39	0.14	0.21	0.02	0.01	0	1.08	0.77	1.53	0.99	0.6	0.59	0.38	0.28	0.19	0.05	0.01	0	1.13	0.29	1.6	0.4	0.56	0.17	0.39	0.03	0.23	0	0.01	0
HighResStereo	sleeping_room_1_3	0.36	0.38	0.51	0.54	0.24	0.26	0.05	0.07	0	0.01	0	0	0.53	0.59	0.72	0.8	0.41	0.46	0.12	0.18	0.01	0.02	0	0	0.3	0.32	0.41	0.42	0.19	0.19	0.03	0.04	0	0	0	0
HighResStereo	sleeping_room_1_7	0.63	0.39	0.98	0.67	0.41	0.22	0.17	0.07	0.05	0.02	0.01	0	0.8	0.69	1.28	1.08	0.48	0.43	0.21	0.19	0.09	0.07	0.03	0.01	0.56	0.25	0.81	0.35	0.38	0.12	0.15	0.02	0.03	0	0	0
HighResStereo	spaceStation2	8.1	7.73	11.65	12.04	0.79	0.79	0.72	0.69	0.66	0.62	0.59	0.51	4.13	4.05	7.51	7.48	0.61	0.59	0.44	0.43	0.36	0.35	0.32	0.32	10.11	9.59	13.27	13.79	0.88	0.88	0.86	0.83	0.82	0.76	0.73	0.6
HighResStereo	stack_circles4	9.87	0.71	13.25	1.81	0.78	0.3	0.63	0.16	0.58	0.07	0.55	0.03	6.23	1.36	10	2.91	0.75	0.53	0.54	0.32	0.42	0.16	0.35	0.07	11.89	0.34	14.75	0.64	0.8	0.17	0.68	0.07	0.66	0.02	0.66	0
HighResStereo	stack_circles9	6.07	0.79	8.29	2.05	0.81	0.33	0.72	0.16	0.63	0.08	0.56	0.03	4.36	1.43	7.18	3.06	0.72	0.54	0.56	0.31	0.41	0.16	0.33	0.07	7.15	0.38	8.91	0.99	0.87	0.2	0.82	0.06	0.76	0.02	0.7	0.01
HighResStereo	time_travellers_10	27.37	8.31	36.82	19.86	0.72	0.48	0.62	0.3	0.58	0.22	0.56	0.19	21.84	13.35	33.03	25.83	0.74	0.66	0.58	0.49	0.5	0.36	0.44	0.28	29.62	6.26	38.26	16.82	0.71	0.41	0.63	0.21	0.62	0.16	0.61	0.15
HighResStereo	time_travellers_13	7.53	0.87	9.5	2.37	0.79	0.32	0.68	0.16	0.64	0.07	0.63	0.04	5.71	1.7	8.47	3.68	0.66	0.57	0.52	0.34	0.47	0.18	0.44	0.1	8.78	0.3	10.15	0.43	0.88	0.15	0.79	0.03	0.77	0	0.76	0
HighResStereo	time_travellers_15	11.69	2.79	15.81	8.32	0.71	0.27	0.6	0.16	0.56	0.12	0.56	0.1	8.73	5.29	13.96	11.57	0.67	0.55	0.5	0.36	0.41	0.24	0.39	0.2	13.39	1.34	16.78	5.66	0.74	0.11	0.66	0.05	0.65	0.04	0.65	0.04
HighResStereo	time_travellers_2	6.96	1.09	10.05	3.19	0.65	0.38	0.57	0.2	0.53	0.09	0.5	0.05	5.19	2.05	8.69	4.87	0.6	0.6	0.46	0.36	0.39	0.19	0.35	0.11	8.24	0.39	10.93	0.67	0.7	0.22	0.64	0.08	0.63	0.02	0.61	0
HighResStereo	time_travellers_20	5.2	0.54	6.37	1.37	0.86	0.22	0.78	0.11	0.71	0.05	0.56	0.02	3.92	1.2	5.51	2.32	0.71	0.51	0.59	0.3	0.51	0.15	0.41	0.07	5.85	0.21	6.76	0.3	0.94	0.07	0.88	0.01	0.81	0	0.63	0
HighResStereo	time_travellers_24	35.4	6.89	43.32	19.33	0.86	0.45	0.79	0.27	0.73	0.18	0.7	0.14	25	10.56	36.69	23.91	0.82	0.67	0.69	0.46	0.56	0.31	0.48	0.24	38.93	5.64	45.35	17.5	0.88	0.37	0.82	0.2	0.79	0.13	0.77	0.11
HighResStereo	time_travellers_25	7.69	1.57	11.21	5.71	0.65	0.38	0.54	0.17	0.5	0.08	0.49	0.06	6.74	3.38	11.03	8.98	0.66	0.59	0.5	0.35	0.41	0.19	0.39	0.14	8.32	0.37	11.33	0.88	0.65	0.25	0.57	0.05	0.56	0	0.56	0
HighResStereo	time_travellers_3	12.76	2.93	17.77	8.76	0.73	0.41	0.64	0.25	0.6	0.15	0.59	0.12	9.54	4.23	15.43	10.69	0.68	0.61	0.56	0.39	0.48	0.24	0.44	0.17	15.15	1.97	19.34	6.98	0.76	0.27	0.7	0.15	0.69	0.08	0.69	0.08
HighResStereo	twirls2	1.23	0.81	2.08	1.17	0.43	0.49	0.32	0.31	0.24	0.11	0.08	0.01	1.5	1.13	2.33	1.5	0.58	0.69	0.41	0.46	0.28	0.17	0.08	0.02	1.05	0.6	1.91	0.89	0.34	0.35	0.25	0.21	0.21	0.06	0.07	0
HighResStereo	twirls3	1.07	0.71	1.63	1.04	0.43	0.43	0.33	0.27	0.26	0.05	0.03	0.01	1.16	0.99	1.78	1.38	0.49	0.58	0.35	0.38	0.24	0.12	0.06	0.02	1.02	0.57	1.56	0.82	0.39	0.36	0.32	0.21	0.27	0.02	0.01	0
HighResStereo	voronoid_sphere6	3.16	3.3	7.65	7.96	0.52	0.45	0.29	0.3	0.19	0.21	0.14	0.16	3.88	4.5	8.63	9.48	0.58	0.58	0.36	0.4	0.25	0.29	0.17	0.22	1.95	1.29	5.6	4.36	0.42	0.24	0.16	0.12	0.1	0.08	0.08	0.07
HighResStereo	voronoid_sphere9	3.39	2.84	5.54	5.3	0.56	0.56	0.45	0.42	0.38	0.3	0.32	0.2	2.63	3.09	4.73	5.66	0.51	0.54	0.38	0.41	0.3	0.33	0.24	0.23	7.83	1.35	8.88	2.35	0.84	0.7	0.83	0.48	0.82	0.16	0.77	0.03
HighResStereo	walker4	6.1	2.29	7.61	3.87	0.81	0.57	0.74	0.44	0.68	0.33	0.61	0.2	5.15	2.98	7.18	4.8	0.65	0.62	0.55	0.48	0.51	0.37	0.49	0.27	6.7	1.86	7.87	3.15	0.9	0.53	0.85	0.41	0.78	0.3	0.69	0.16
HighResStereo	windmills4	0.95	0.68	1.37	0.93	0.56	0.53	0.36	0.21	0.12	0.05	0.02	0	1.21	1.11	1.79	1.45	0.6	0.68	0.39	0.44	0.19	0.17	0.07	0.01	0.88	0.57	1.22	0.73	0.55	0.49	0.35	0.14	0.1	0.01	0.01	0
HighResStereo	youngster_room10	0.63	0.42	1.83	1.1	0.32	0.21	0.12	0.08	0.04	0.03	0.01	0.01	1.16	0.92	2.9	1.89	0.55	0.51	0.29	0.24	0.11	0.1	0.04	0.03	0.37	0.19	0.96	0.27	0.21	0.06	0.04	0.01	0	0	0	0
HighResStereo	youngster_room14	2.51	0.85	4.16	1.64	0.67	0.38	0.5	0.21	0.33	0.11	0.21	0.05	2.18	1.26	4.04	2.29	0.59	0.55	0.39	0.29	0.24	0.16	0.17	0.1	2.68	0.63	4.22	1.15	0.7	0.29	0.55	0.16	0.38	0.09	0.24	0.02
HighResStereo	youngster_room4	0.65	0.35	1.02	0.62	0.43	0.21	0.18	0.06	0.06	0.01	0.01	0	0.86	0.66	1.32	1	0.57	0.48	0.25	0.17	0.08	0.04	0.03	0.01	0.54	0.2	0.82	0.28	0.36	0.07	0.14	0.01	0.05	0	0	0
HighResStereo	youngster_room7	0.82	0.46	1.6	0.94	0.44	0.23	0.2	0.08	0.08	0.04	0.04	0.01	1.19	0.84	2.14	1.51	0.6	0.46	0.31	0.2	0.13	0.1	0.06	0.03	0.63	0.27	1.24	0.4	0.36	0.12	0.14	0.02	0.05	0.01	0.02	0
HighResStereo	youngster_room9	0.63	0.38	1.02	0.72	0.39	0.21	0.19	0.06	0.07	0.02	0	0	0.85	0.71	1.37	1.22	0.54	0.47	0.26	0.19	0.1	0.05	0.01	0.02	0.53	0.24	0.83	0.33	0.32	0.1	0.16	0.01	0.06	0	0	0
HighResStereo	dining_room_1_13	1.34	0.67	2.29	1.87	0.47	0.31	0.34	0.14	0.22	0.04	0.12	0.02	1.23	1.11	2.02	2.47	0.57	0.6	0.37	0.31	0.19	0.08	0.07	0.03	1.4	0.41	2.45	1.37	0.41	0.13	0.32	0.04	0.24	0.02	0.16	0.01
HighResStereo	living_room_3_2	1.04	0.77	1.45	1.09	0.63	0.59	0.41	0.29	0.14	0.03	0.02	0.01	1.36	1.06	2.08	1.65	0.57	0.62	0.41	0.35	0.25	0.13	0.06	0.04	0.95	0.69	1.21	0.87	0.64	0.58	0.41	0.28	0.1	0.01	0	0
HighResStereo	office_top4	0.68	0.47	0.96	0.61	0.44	0.41	0.24	0.1	0.07	0	0	0	0.67	0.57	0.92	0.73	0.46	0.46	0.25	0.18	0.04	0	0	0	0.69	0.43	0.98	0.55	0.44	0.39	0.24	0.07	0.08	0	0	0
HighResStereo	sleeping_room_1_13	1.47	0.38	2.36	0.62	0.63	0.25	0.42	0.06	0.19	0.01	0.12	0	1.26	0.71	2.13	1.07	0.62	0.5	0.39	0.23	0.12	0.04	0.09	0.01	1.55	0.27	2.44	0.36	0.63	0.17	0.43	0.01	0.21	0	0.14	0
[truncated: 3,930 more rows]

## Sheet: References
Bibtex Entries
[truncated: 18 more rows]
